# Supplementary material for: Differences in the inflammatory proteome of East African and Western European adults and associations with environmental and dietary factors
Source: eLife. 2023 Aug 9;12:e82297. doi: 10.7554/eLife.82297 (PMC10473835; doi:10.7554/eLife.82297)
Supplement: Source data 1. [file elife-82297-data1.xlsx]

## Sheet: Sheet 1
Cohort	4E-BP1	ADA	AXIN1	CASP-8	CCL11	CCL19	CCL20	CCL23	CCL25	CCL28	CCL3	CCL4	CD244	CD40	CD5	CD6	CD8A	CDCP1	CSF-1	CST5	CX3CL1	CXCL1	CXCL10	CXCL11	CXCL5	CXCL6	CXCL9	DNER	EN-RAGE	FGF-19	FGF-21	FGF-23	Flt3L	HGF	IFN-gamma	IL-10RA	IL-10RB	IL-12B	IL-15RA	IL-17A	IL-17C	IL-18R1	IL10	IL18	IL6	IL7	IL8	LAP.TGF-beta-1	LIF-R
Dutch	6.61264	4.93394	2.77684	2.57231	5.77386	8.06344	8.68959	9.92493	5.36536	1.8404	3.985	4.72362	7.29957	11.441	4.9729	5.06428	9.52098	2.30522	9.53556	4.48871	5.09046	7.47355	8.36986	7.44738	8.91505	8.36201	6.02191	9.0924	2.81722	8.46021	4.63758	2.24176	7.65929	7.45595	5.7252	1.06787	5.41021	4.93538	1.13189	1.81859	1.63536	7.89978	3.23391	7.55146	2.65429	2.5358	3.63611	6.69739	3.46028
Dutch	6.74916	5.22062	3.66664	3.22599	6.51212	9.12329	6.22762	10.2656	5.76616	1.78795	3.70746	5.41243	7.34675	11.1981	5.28309	5.41467	10.4912	1.97309	9.72443	5.10471	5.44641	9.08937	8.15846	7.27919	10.3095	8.41839	6.03007	9.25694	1.729	8.02951	3.70363	1.99815	8.65902	8.16201	5.42391	0.744	5.61986	5.77945	1.38672	1.84999	1.41665	8.1938	2.70168	7.64364	2.0141	3.16577	4.31364	7.63274	3.85049
Dutch	6.33458	5.1592	3.70209	3.19766	5.55417	8.56785	6.15381	9.80081	5.16156	1.76763	4.54673	5.14522	7.46174	12.0276	5.26294	5.05236	9.57446	2.28619	10.3747	4.87128	6.08994	7.94705	10.0962	7.45611	9.07993	7.43648	6.76316	8.87839	1.37762	7.65126	7.05744	1.93495	8.88764	7.55306	10.563	0.60188	6.27955	5.66924	1.3898	1.44555	1.25387	8.46239	3.27508	7.89369	3.37359	2.91413	4.06539	7.45751	3.89163
Dutch	2.75355	5.74346	1.56274	2.42345	5.29562	7.75186	5.66952	9.64735	6.31634	1.16293	3.23627	4.94503	6.33368	10.8859	4.81308	4.47254	7.8678	2.22472	10.2555	4.36756	5.59638	7.75155	9.0997	6.10018	9.96545	6.79013	6.16359	8.74964	2.02954	8.3226	3.72988	2.0385	9.27015	7.94693	5.68717	1.32464	6.02143	4.99231	0.87349	1.45627	0.56019	7.63389	3.01896	7.58199	3.32486	2.29093	3.20146	6.53851	3.78745
Dutch	7.88408	5.37253	3.64076	3.95433	6.63208	8.87229	7.1897	10.138	5.81332	2.21728	4.45239	5.53965	7.93486	11.6095	5.20401	5.70906	11.6383	2.26651	9.85607	4.92726	6.07405	10.0077	8.56685	7.04801	11.5783	8.91464	6.38919	9.32465	2.4019	9.36573	6.35939	2.75353	8.85949	8.2492	5.46636	1.10696	5.87356	5.61915	1.71321	2.15293	1.22346	8.69412	3.69806	8.04025	2.64213	3.32575	4.28828	7.58017	3.89601
Dutch	6.16169	5.17577	2.43512	2.93375	6.31277	11.3104	6.45433	9.86818	5.0283	1.79223	3.86743	5.29594	7.29801	11.0269	5.23988	5.35262	11.1769	2.53762	9.98597	5.22351	6.00473	7.71727	9.55948	7.32848	8.1299	7.29581	6.85715	9.37794	1.97421	7.21941	4.15819	2.62182	9.03874	8.02961	7.66413	1.42566	5.97407	5.67296	1.13964	1.55273	0.89897	8.41404	3.55094	7.78241	2.97745	2.96055	4.21672	6.9448	3.83369
Dutch	7.30116	5.66749	3.03688	3.76536	6.30903	8.60812	5.7529	10.3507	5.76715	1.92727	3.91786	5.74572	7.09132	11.6076	5.18336	5.19964	9.61374	2.21797	9.77376	5.03564	5.90063	8.65154	8.34588	7.28996	9.3866	7.9634	6.15326	9.31934	2.98217	7.82688	4.4347	2.27504	9.04731	8.07955	6.04443	0.93644	6.03778	4.53304	1.05271	1.31006	1.20426	8.30671	3.39442	8.30871	2.17288	2.93733	4.04665	7.66399	3.9378
Dutch	4.981	5.11918	2.07313	2.88074	7.36168	8.76996	7.08756	9.4709	7.34709	1.50661	3.92137	5.08206	6.72146	10.9881	5.33631	5.08271	10.4477	3.25715	9.98145	4.91565	6.71631	7.21421	8.6918	6.28275	7.94144	7.74395	5.97423	9.27232	2.05745	9.40255	4.75456	2.26704	9.4182	8.53542	6.24465	0.61925	5.94291	4.64176	1.40777	0.86487	1.52123	7.96261	3.17589	8.10684	2.52092	2.93492	4.42765	6.62658	3.92559
Dutch	6.99731	5.26799	3.57057	3.9961	6.85106	8.57107	6.47231	10.3681	6.46197	2.1342	4.55564	5.84731	6.98891	11.5425	5.17293	4.80565	10.6706	2.294	9.79409	5.206	6.15225	9.12779	8.46866	7.39332	10.2614	8.73978	6.35276	9.14374	2.33799	8.95277	5.79383	2.38365	8.73501	8.30301	5.76221	0.59578	5.71186	5.4673	1.06137	1.13954	1.34405	8.24566	3.39029	8.23097	2.51627	3.317	4.33119	7.1397	3.68891
Dutch	6.41545	5.10904	2.86544	2.89058	5.81639	8.85384	6.10588	9.56784	5.67283	1.89235	4.33725	5.35327	6.88023	11.0551	4.85336	4.81733	9.47837	2.74686	10.0038	4.48243	5.12	8.20186	8.68626	6.85627	9.5491	7.98713	6.16776	8.95239	1.95843	9.01622	6.92435	2.2254	9.04811	8.23103	6.29337	1.02117	5.98366	5.45635	0.96735	1.23543	1.27874	8.49512	3.22927	8.08589	3.31922	2.70514	3.30522	7.07343	3.73808
Dutch	2.6955	5.05923	2.73191	3.66795	5.08389	7.91067	5.53204	9.66054	5.30638	1.23757	3.31041	4.78892	7.02519	11.2529	5.4371	5.20394	7.41605	1.92602	9.87276	5.19029	6.2735	6.94859	8.49315	6.42143	9.08241	7.93799	5.4485	8.79577	2.28051	8.30964	3.13149	2.462	9.2762	7.61685	5.35101	2.56592	5.94051	5.3307	1.03356	4.48955	0.86271	7.56451	3.07225	7.28511	2.36076	2.39098	4.11181	6.88994	3.57504
Dutch	7.11848	5.28775	4.05081	4.29681	6.1015	8.99374	6.22009	9.77971	4.88528	1.89421	3.98009	5.24313	7.10182	11.3512	4.80612	4.82197	10.0596	2.1198	9.691	4.79402	5.77612	9.69821	9.73013	9.12685	10.1252	9.17534	6.63997	8.71579	1.87881	8.06633	5.54714	2.30592	8.39763	7.8784	6.84681	0.91607	5.53102	5.83083	1.01917	1.51953	1.05335	8.24952	3.65949	8.19347	2.74998	3.82083	4.55	7.39872	3.4583
Dutch	6.58201	5.25624	2.99525	3.73091	6.94935	8.27164	6.18947	9.64591	7.44628	1.83699	5.63555	6.40174	6.98143	11.8178	5.52389	5.41731	10.85	4.77224	9.94225	4.80776	6.24272	7.70362	9.89399	9.15908	8.53252	7.83875	8.61964	9.03216	2.4011	8.16264	4.09271	3.13481	8.90453	7.7877	7.26776	1.11065	6.05673	5.75816	1.75255	1.74735	1.31275	8.3504	4.31799	9.09104	3.46518	2.64487	5.02969	7.34533	3.90212
Dutch	7.55681	5.23068	3.36081	3.55255	6.41627	8.08397	6.23185	10.388	5.7541	1.58007	3.9245	5.26505	7.23589	11.6109	4.99726	5.21801	10.3538	1.85928	9.74586	4.72094	5.91294	7.87827	8.99048	6.91942	9.65549	8.9363	6.468	8.91787	1.51704	9.15779	2.3875	1.90464	9.06372	7.86861	5.58465	1.15484	5.65161	5.25806	1.68788	1.6673	1.561	7.88454	3.05369	7.96625	2.26075	3.0976	4.37438	7.82164	3.65772
Dutch	8.82703	5.11368	4.43525	4.19036	6.29506	8.87747	6.51692	10.1236	6.87669	1.92568	4.47182	5.3541	7.85144	12.456	5.68629	5.56963	10.295	2.23785	9.80524	5.03383	5.75117	9.87375	8.22565	8.34616	11.6104	9.41181	6.40023	8.63848	1.63777	8.74017	4.61624	2.15223	9.15054	8.05694	6.00186	1.39265	5.6535	5.88441	1.01368	1.54041	1.07499	7.47938	3.26861	8.14672	3.09777	3.69244	4.50324	8.12468	3.76001
Dutch	7.23469	5.03422	3.21351	3.44161	6.23642	9.04853	5.94852	10.5339	5.31698	1.78603	4.72218	6.20178	7.3026	11.655	5.45348	5.86355	10.5252	2.75152	9.96209	5.01931	6.02917	9.38744	9.05399	7.2295	11.1179	8.51152	6.66946	9.22042	2.64691	7.85905	3.56325	2.10293	8.94791	7.76432	5.62712	0.91238	5.75384	5.58674	1.54615	0.96193	1.57345	7.93329	3.59228	7.90635	3.65872	3.20012	4.53709	7.48961	3.94688
Dutch	3.60616	5.2136	3.97257	3.85373	5.7787	9.29812	6.18872	9.66226	5.96315	1.77704	4.36074	5.49258	7.33854	11.42	5.5986	5.62164	7.51227	2.86713	9.95026	5.14889	6.58533	9.78013	10.5746	8.02236	11.4749	8.33711	6.98658	9.01536	1.4214	7.16503	4.25703	5.35327	9.36259	8.22494	7.70133	0.68948	6.13459	5.49645	1.2314	0.90152	0.81235	7.9558	3.11449	8.43546	3.35955	4.19941	4.63852	7.16005	3.87414
Dutch	8.09458	5.48183	3.83818	3.82219	6.28016	9.19957	6.08868	9.58508	5.75471	2.00105	3.87016	5.45877	6.96542	11.62	5.23402	5.41172	9.44311	2.27984	9.8014	5.60332	5.55955	9.00527	8.3108	6.60749	11.229	8.48579	5.87492	9.07341	1.82983	8.23934	4.45572	2.50877	9.10218	8.57008	5.80325	0.95962	5.92427	5.54162	1.28567	1.67771	1.43115	8.0576	3.82404	7.85529	1.78949	3.40881	4.43493	7.38576	3.72281
Dutch	8.74098	5.63462	6.15845	4.57058	7.0731	8.74148	7.02195	9.99551	6.11977	2.17203	5.19044	6.17313	7.91787	12.5158	4.97928	5.22087	9.86692	4.00935	9.70787	5.71141	6.1303	9.64887	9.98772	8.02745	10.8476	8.63453	7.00518	8.99416	1.90582	8.23016	4.36337	2.39559	9.39042	8.18895	5.25336	0.68207	5.7652	5.36467	1.37863	2.02105	1.59799	8.44881	4.16376	7.98355	5.1703	3.34722	5.04012	8.45406	3.29593
Dutch	2.66206	5.14904	2.03016	3.51402	5.35274	10.0781	5.89201	9.4683	6.08429	1.14137	3.9631	5.52634	6.7285	11.2211	5.04775	5.38605	6.89997	2.11374	9.75789	5.00162	6.39723	8.30739	8.5108	6.80562	9.36245	7.48238	6.43819	9.21414	2.3895	8.66452	5.92142	2.06685	9.46619	8.07078	6.74797	0.35127	6.03814	4.76557	1.18294	0.99636	0.81042	7.86766	2.84358	7.61246	2.79763	2.30269	4.4601	6.86993	3.96987
Dutch	7.70186	5.19893	4.37411	3.83401	6.50199	8.2857	5.88735	9.97586	6.26339	1.76979	3.77736	5.43086	7.22617	11.5291	4.64532	5.55449	9.39631	1.74971	9.61158	4.74277	5.77208	9.69255	8.9035	8.91381	12.3161	9.09405	6.32292	9.3528	2.3508	8.32888	4.73369	2.18268	9.504	8.38435	5.02002	2.36777	5.62905	5.48168	1.10515	1.1077	1.13103	8.84955	2.9757	7.17294	2.37591	3.41884	4.77562	7.96823	3.83002
Dutch	7.98299	5.82225	3.68466	4.10116	6.95275	8.53603	6.59627	9.87958	5.88127	2.241	4.09514	5.66256	7.28337	11.4123	5.40644	5.19974	9.84909	2.3481	9.90986	4.78629	6.17971	9.26144	9.80008	8.86516	12.3654	9.27747	9.86391	8.91614	2.05066	7.28034	3.9125	2.50196	9.48031	8.03154	7.54047	0.93554	5.95278	5.9115	1.54861	2.64442	0.842	8.25698	3.42846	8.31033	2.35664	2.9458	4.93488	7.5046	4.14306
Dutch	8.37018	4.65409	4.74977	4.46984	7.15796	8.03474	5.76796	9.84445	5.46804	2.11463	4.09056	5.778	7.15285	11.7437	4.52492	3.76748	8.47934	2.98927	9.39296	5.59846	5.34833	9.78541	9.07058	8.10595	11.8557	8.28688	6.89705	9.2392	1.63862	7.87263	4.34379	2.42361	8.82037	8.19329	5.87436	4.92551	5.36129	4.62691	1.372	1.52017	1.34758	7.54764	2.59433	7.79567	2.56165	3.65191	4.61544	7.98641	3.59435
Dutch	6.54678	4.96851	2.65407	2.12415	5.6122	8.28656	6.22014	10.1542	6.17094	1.45236	4.16095	5.8439	7.16006	11.4338	5.27274	4.68304	9.6487	2.23496	10.1699	4.98691	5.80679	6.71394	8.40109	6.46823	7.86018	6.94052	6.1562	8.99313	1.52818	8.58949	3.27594	2.83269	8.53434	7.97783	5.69256	0.96759	6.08103	5.50553	1.29077	1.10119	1.25841	8.22883	3.12871	7.82153	3.10783	2.41101	3.55742	7.06542	3.61524
Dutch	7.67586	5.3401	4.02862	3.76541	6.10283	8.32241	6.01588	10.0986	6.04586	1.35502	4.18781	5.30502	7.61284	11.7933	5.16685	4.80304	10.2411	1.65775	9.71095	4.70429	5.78014	9.73211	8.61366	6.9393	11.4098	8.21917	6.05302	8.91904	1.03234	7.70722	7.24775	2.45445	9.36606	7.82752	6.04158	1.3594	5.78382	4.34128	1.4813	1.74449	1.65988	8.05732	2.93869	7.75867	2.3965	3.31486	4.18399	7.41393	4.47729
Dutch	5.81297	5.25883	2.76018	3.10875	6.22802	9.33134	6.49288	10.8532	5.77812	1.78347	4.38049	5.85453	7.36067	11.9404	5.37751	6.26318	10.5711	2.43206	9.85238	6.98799	6.04537	8.122	8.89195	7.59661	9.97898	8.14321	6.90082	9.19269	1.51359	8.85063	5.01883	2.55758	9.06678	7.84022	6.69295	1.28896	6.0442	5.34331	1.18951	1.75348	1.42491	7.86992	3.65532	8.11157	2.26163	2.81045	4.05922	7.558	3.71662
Dutch	6.19233	4.42918	4.21357	3.02747	5.46647	8.81719	7.9835	9.98003	5.21391	1.3339	4.72595	5.86806	7.52078	12.0414	5.29996	4.283	9.143	2.46437	9.48422	5.06029	4.71342	7.6781	9.24017	6.95459	9.28466	7.92942	7.18492	8.23611	1.22077	7.84095	4.5799	2.15194	8.55334	7.19152	8.47843	2.10366	5.1819	5.17569	0.83219	2.12183	1.19061	8.03378	2.23547	8.15251	2.71868	2.39006	3.53973	7.01725	2.86328
Dutch	5.14981	5.93734	2.46635	2.6028	5.70482	8.67729	5.55877	9.85922	6.18765	2.01732	4.54456	5.65369	6.93934	11.2295	5.2488	5.29645	10.4686	2.87902	10.4819	4.74803	6.06907	7.09471	9.3834	7.30503	7.71018	7.32718	7.42341	9.13434	1.96591	7.2711	2.80845	2.17533	8.69431	7.75191	8.005	1.76594	6.18463	5.62589	1.36823	1.78893	0.77356	8.39115	3.59978	8.00372	3.14813	2.19773	3.77788	6.98851	3.45095
Dutch	4.00562	4.79326	2.601	2.6527	5.22094	8.57968	5.17707	9.75392	5.17799	1.48685	3.8162	4.48315	6.78708	10.716	5.14952	4.63099	8.6947	1.75579	10.0096	4.75678	5.68757	9.01138	8.7444	6.82348	10.6103	7.25581	6.68451	8.75726	1.63059	7.69893	5.79946	2.07272	8.7212	7.42102	5.97526	0.61843	6.08281	5.61472	0.81438	1.15896	0.70528	8.04172	2.99039	7.47371	2.31694	3.1305	3.75453	7.26341	3.35368
Dutch	6.82599	5.49143	3.54159	2.83707	5.93878	7.95416	4.9951	10.4408	6.26561	1.68535	4.10356	5.20202	6.77466	11.2193	5.12411	5.07789	9.86416	2.0339	9.60828	4.26232	5.29875	9.24598	8.42583	6.81043	10.8042	8.59476	5.87285	9.02494	1.84685	7.32878	6.04302	1.88346	8.67541	7.9774	5.39374	0.58872	5.47155	5.32419	1.44629	1.21116	1.27812	8.4409	3.34788	7.39045	3.43512	3.26453	4.64318	7.34122	3.54064
Dutch	6.25961	5.50073	4.41101	3.3882	6.34752	8.81729	6.34778	9.90407	5.64116	1.28946	4.21403	5.31092	7.04399	11.6711	5.25344	5.35077	9.23228	1.7534	9.74502	5.03352	5.66593	9.03846	9.20067	7.94514	10.8067	8.04824	6.84139	8.82134	1.35875	7.81407	5.11309	2.62147	9.2212	7.79145	7.65607	1.85824	5.52728	5.48291	0.68737	1.80187	1.20713	7.96799	3.36564	7.38557	3.16705	2.6914	4.33967	7.98886	3.59142
Dutch	5.83559	5.03456	2.3843	2.81968	6.16804	9.9987	6.99971	10.3626	6.07505	1.63517	4.11642	5.10634	7.53859	11.1088	5.36388	6.73994	11.099	2.47264	9.77143	5.07791	6.02722	7.16817	10.6116	8.4782	9.56165	8.46287	9.11137	8.75675	1.43723	8.36113	3.70781	2.28144	8.29434	7.91439	6.3278	0.78399	5.77734	6.99458	1.60306	1.90234	0.91297	7.85182	3.41181	8.24548	2.55733	2.03428	4.18301	7.03512	3.93337
Dutch	6.88351	5.10589	2.34125	2.87474	5.97125	8.77703	5.71792	10.0153	6.75194	1.77414	4.3523	5.43969	7.23602	10.9555	5.14206	5.50302	11.0312	1.83952	9.69478	4.73066	5.78769	7.56151	8.8278	6.8852	7.96666	8.45183	6.28653	8.77811	2.65906	7.64615	4.31044	2.24172	8.59853	7.92048	6.04693	0.69337	6.03177	5.75069	1.25291	1.54317	1.15048	8.24001	3.49159	7.64404	2.76679	1.96978	3.9454	7.10294	3.56409
Dutch	8.48657	5.46213	4.35388	3.95387	6.51997	9.14599	6.80077	9.90262	6.1078	2.32001	4.75512	5.32181	7.26145	11.9018	4.94726	5.46239	10.4803	2.05092	9.566	4.59598	5.23912	8.7834	8.97174	7.38064	9.79165	8.27591	7.03223	9.06854	3.08915	9.31273	6.04681	2.60352	8.74206	8.1832	7.76152	1.04417	5.48168	5.77128	1.15508	2.5457	1.45121	8.30655	3.7451	8.53652	2.91225	2.73822	4.58314	8.37006	3.83205
Dutch	6.47829	5.29855	3.60315	3.86855	6.52868	9.15507	6.02193	8.89065	5.88749	1.60206	4.48835	5.50406	7.28822	12.2706	4.60717	4.41568	8.60186	3.36141	9.49864	4.69785	5.1155	9.9063	9.81824	7.5805	10.6455	9.11281	7.46287	8.53052	2.01246	8.28956	5.52647	2.32198	9.04096	8.28506	7.51219	0.98192	5.88688	5.37021	1.0951	3.43448	1.17867	8.37737	2.82465	8.04669	3.86852	3.13564	5.25088	7.71563	3.49931
Dutch	5.26398	5.15041	3.2467	4.02909	5.52167	8.76586	5.06356	9.79162	4.92225	1.33595	4.08705	5.75937	7.30688	11.5513	4.8531	4.71312	9.82204	2.0656	10.4236	4.69647	5.67513	8.86698	8.99843	7.70959	9.95408	9.78036	6.77775	8.50407	1.20529	7.85083	5.4506	2.51777	9.36006	7.90626	8.40251	0.74711	5.90329	5.6845	1.1133	1.03748	0.84222	8.47315	3.03713	8.47782	3.25056	3.69375	4.18045	7.41107	3.35764
Dutch	6.43671	5.35943	2.34356	2.61426	5.80482	8.72447	7.18215	10.1081	5.19036	1.53167	3.7896	5.09073	6.68034	10.65	4.69466	4.51628	9.6886	1.83085	9.5407	4.65457	5.69771	7.60286	9.34215	6.60989	9.60904	8.15041	5.67303	9.06728	1.78248	7.98954	4.70206	2.35459	8.94287	8.34326	5.14432	0.61744	5.63967	4.82526	0.94417	1.80357	1.07198	8.39277	3.09812	7.61376	2.09482	2.30305	4.44056	6.63981	3.58769
Dutch	6.1528	5.07753	3.48952	3.25613	5.46442	8.94967	7.07204	9.91982	5.29642	1.63127	3.84275	5.33063	6.65792	11.2626	5.09014	5.5015	9.20452	1.73774	9.72424	4.99404	5.69196	7.74756	9.27108	7.40718	9.81976	7.88198	7.03879	8.81941	1.44407	7.29646	5.24392	2.06833	9.42041	7.99422	6.4782	0.71472	5.75481	6.28227	1.20176	2.53085	0.70621	7.87377	3.66835	7.67759	2.83175	2.56402	3.66941	7.32163	3.26185
Dutch	5.36772	5.20771	2.13601	2.26328	5.65978	9.26299	6.2345	9.5143	5.48767	1.82482	3.36369	4.86931	6.69375	10.7968	5.13487	4.07531	10.3679	1.65413	10.0518	5.01377	5.36683	7.60311	9.05868	6.35143	8.22582	6.99426	5.85356	9.09981	2.07018	8.60147	3.7505	1.86658	9.17579	7.74205	5.86264	0.4743	5.89693	5.82484	0.7539	1.94474	1.2315	7.66758	3.48648	7.28608	2.41895	2.34112	3.62063	6.63299	3.67419
Dutch	6.84096	5.05066	2.95479	2.52987	6.20221	8.3929	6.37092	8.92213	5.24642	1.65185	3.9111	4.98127	6.54455	10.9676	4.88226	5.12282	9.04687	3.25743	9.99579	5.52704	5.66812	7.00547	8.37147	6.48976	8.93383	7.34662	6.18019	9.02339	1.75832	7.12938	5.83963	1.98367	8.81442	8.06239	6.45173	0.61863	4.98075	4.55763	0.85861	1.39438	0.71948	7.44374	3.26358	7.7957	2.21991	2.19504	5.38149	6.93339	3.51095
Dutch	6.4895	6.03728	4.61141	3.04101	5.94839	9.90867	7.60067	10.6166	6.12631	2.24509	4.20599	5.33273	6.89865	11.4007	5.06912	5.15468	9.55882	2.18638	10.6547	5.03779	6.41926	8.64742	9.63938	7.86859	10.0931	7.66509	6.55176	9.50466	1.38832	10.3948	7.2277	2.39138	9.6523	8.50985	8.49342	0.40058	5.73508	5.53102	1.17948	2.13284	1.17029	9.06102	3.62253	8.31957	4.67929	2.98922	3.66021	7.61943	3.86234
Dutch	6.38351	5.06679	2.37277	2.29765	5.82585	9.0263	5.66471	10.5065	5.37892	1.37199	3.7767	5.65799	6.52335	10.7108	4.60663	4.66023	9.86689	1.39948	9.70793	5.04866	5.30835	7.96807	8.17304	6.40439	8.92581	7.60912	5.92168	9.12406	2.35756	7.87876	4.88785	2.52897	8.44737	7.78116	5.65251	0.66865	5.78946	5.24257	1.11164	1.27504	1.26028	7.91378	3.32645	7.76864	1.94438	2.64309	3.98419	7.02194	3.58871
Dutch	7.84976	5.41945	4.25843	3.5448	6.34874	8.77481	7.4659	10.405	5.73244	1.93782	4.45065	6.04795	7.20146	11.3836	5.25158	5.26321	10.4553	1.63781	9.55022	5.40597	5.59574	9.43434	8.47355	8.13248	11.6122	8.47919	7.0234	9.05478	1.82835	8.41805	4.60518	2.36815	8.58032	7.96936	5.74069	0.7739	5.28196	5.95915	1.28762	3.10335	1.44474	7.88841	3.33129	7.77735	1.92267	3.26382	4.43737	7.96328	3.74816
Dutch	7.41672	5.30962	4.38345	4.2407	6.2747	9.74145	6.56516	9.69982	5.57102	2.24274	4.8085	5.84678	7.40252	11.8887	5.20064	5.05949	10.906	2.11324	10.7508	5.19418	6.18797	9.40044	11.9805	9.28037	10.8632	9.70205	7.93324	9.18365	2.48616	7.65053	6.59616	6.87622	9.42073	8.11713	9.56785	0.54694	5.94862	6.07703	1.60963	1.89999	1.22538	8.85076	5.44652	7.78525	5.19402	3.94911	4.70051	8.30915	3.68994
Dutch	5.84171	4.68598	2.49218	3.05445	5.63681	8.38967	6.15089	9.73922	5.13826	1.41262	4.3041	5.17776	6.75594	11.0799	4.77945	4.73484	9.93752	1.57719	9.84036	5.33094	5.53831	9.13018	8.87231	7.48134	12.0968	7.20721	5.87126	8.76498	1.67689	7.94864	4.76621	1.67196	8.67926	7.55216	5.35611	0.67675	5.64733	5.82769	0.89767	1.57741	1.19505	8.19682	2.73501	7.62453	2.65982	2.965	4.16357	7.27676	3.52498
Dutch	2.37984	4.99399	1.80969	3.32892	4.93786	7.91345	4.94962	9.84216	5.07062	1.254	3.51339	5.10724	6.51239	10.5406	4.77899	4.97574	6.60739	1.57638	9.38115	4.31805	5.56719	8.30658	9.14241	6.71591	8.98275	8.23825	7.08745	9.14473	1.50611	6.56027	5.25092	1.87753	8.35491	7.7283	7.29129	0.62112	5.52318	4.47292	0.81586	0.98434	0.85883	7.69661	1.71122	6.33493	2.53654	2.58621	3.96084	6.11527	3.67697
Dutch	5.43173	4.6419	4.3645	2.83663	5.16626	8.4614	6.15412	9.36834	5.08692	1.75302	3.7838	4.74286	7.53167	11.8407	4.90295	3.83054	8.27246	1.45024	10.0199	4.54627	5.50637	8.07406	9.07181	7.47744	10.0995	7.43515	6.29666	8.68977	1.63263	7.82993	4.90504	2.03986	8.50217	7.23096	5.99313	0.79632	5.76236	5.14161	0.85586	1.8291	0.92897	7.52573	2.32727	7.16348	2.741	2.4521	3.47382	6.81789	3.24729
Dutch	6.66995	5.1521	2.98092	2.44228	6.12153	9.00812	6.18451	10.1883	6.10113	1.77821	4.21956	5.98693	7.03651	11.0675	5.16266	5.31712	11.1566	1.82714	10.2369	5.06519	5.68976	8.08182	8.71678	7.2363	11.2139	8.71755	7.08997	8.98117	1.15661	9.08983	6.32032	2.4346	9.22626	7.92776	7.49177	0.99681	5.92665	5.95541	1.43227	2.52714	0.85229	8.32577	3.46268	7.25883	3.22087	2.97386	4.2157	7.43927	3.6512
Dutch	8.22372	5.831	4.19565	3.5861	6.58706	9.45925	8.18922	10.5418	6.20131	1.86271	4.23716	5.98062	7.51864	11.5454	5.3191	5.72324	10.3353	2.38359	9.87598	5.09036	5.91166	9.86715	9.25251	8.39773	10.5221	9.711	6.82933	9.59283	1.50533	9.44582	5.38241	2.48224	9.13707	8.16587	6.55443	1.02114	5.93053	5.21921	1.29095	4.07781	1.35535	8.23645	3.62139	8.59784	3.00072	3.84589	4.79452	7.40302	4.05363
Dutch	6.58818	5.35547	3.62119	2.86011	6.3573	8.78949	6.31199	9.83119	6.61925	1.72923	4.09504	5.48827	7.11356	11.5506	5.02642	5.24125	10.0648	2.04955	9.6665	5.42559	5.92036	7.7743	9.30646	7.53216	10.1685	8.23457	6.58467	9.08937	4.50395	6.7791	5.01969	2.97617	9.10733	8.16265	6.38922	0.68443	6.05757	5.11739	1.66326	1.4395	1.19695	8.05243	3.29885	7.89118	2.70776	2.73896	3.78406	8.04085	3.62596
Dutch	7.17204	4.67547	2.33009	2.97408	6.71952	8.12786	5.40501	10.037	5.49728	1.41754	3.90069	5.58976	6.68114	10.5588	4.98141	4.56369	9.82428	1.19043	9.47339	4.84971	5.73962	8.80027	8.22376	6.17007	9.89345	8.6859	6.02875	8.76472	1.64184	9.41494	5.03666	2.32636	8.7242	7.67692	4.90202	1.74543	5.57381	5.34936	0.95612	1.64537	1.08471	7.83864	3.46849	7.43098	2.33364	2.42456	4.41656	7.21593	3.6225
Dutch	7.62505	5.41173	2.94216	3.44538	6.55677	8.39211	6.45779	10.483	5.37876	1.40761	3.25209	4.90759	6.62598	10.6996	4.70467	4.6376	10.4625	1.49788	9.57623	4.62819	5.48679	8.9407	8.10636	6.4786	9.72496	7.66037	5.80874	9.02702	1.16431	8.78748	4.61402	2.27786	8.4908	7.98922	5.08191	0.80616	5.41922	4.94739	0.99642	0.81832	0.94796	7.35407	2.84745	7.43321	2.47499	2.84759	3.472	7.49117	3.62857
Dutch	6.45173	5.11422	2.12945	2.52173	6.23751	8.61351	7.63817	10.174	5.91446	1.84564	4.2862	5.68002	6.8053	11.0286	4.90138	5.21209	9.1755	1.85555	9.70624	5.06904	5.60283	8.28726	10.5849	5.88871	9.33585	7.88074	5.57622	9.07913	1.4241	8.05296	7.40948	2.36569	9.19254	7.92031	5.85509	0.8096	6.31016	5.09057	1.20034	1.77915	1.43901	8.43432	3.24304	7.27085	2.15476	2.83071	3.98615	7.22234	3.9582
Dutch	7.01799	5.03395	1.8183	2.94631	6.13645	8.60122	5.56705	10.116	5.76841	1.35288	4.20848	5.9135	7.09252	10.8957	4.93249	4.97866	11.2771	1.9389	9.70173	5.0575	5.50456	6.38798	8.53657	7.01499	7.3379	7.85086	6.01141	8.84044	1.92959	9.21779	5.19516	2.21134	8.67781	8.05945	5.50088	0.73353	5.66306	4.83361	1.05893	1.39238	1.26008	8.45359	3.96103	7.70231	2.44824	2.7073	3.29708	6.76261	3.61088
Dutch	6.07562	4.9881	3.40574	3.43	5.12902	8.13917	5.38953	9.74023	5.97173	1.41803	4.17327	4.98634	7.32749	11.4037	5.33315	5.08931	9.17263	1.83266	9.65806	4.31274	5.1032	9.6959	9.24794	8.34806	10.352	7.85349	8.19052	8.5725	1.66062	7.68823	3.08963	1.92127	8.74889	7.32288	6.25829	1.33281	5.48462	5.92332	0.99876	1.5515	1.13665	8.0402	3.69691	7.27179	1.97892	3.10518	3.74713	7.21626	3.11412
Dutch	6.86789	5.60282	3.56456	3.5551	7.61308	8.72991	7.64575	10.2156	6.89378	2.49716	4.25259	5.93762	7.23232	11.852	5.35152	5.39821	8.89387	2.30322	9.75833	5.06016	5.89686	7.75336	9.17598	7.94473	8.45693	7.84473	7.76088	9.28622	3.21858	5.84031	5.36394	2.59545	9.51841	8.57452	5.97454	0.98355	5.89557	5.4368	1.31347	2.61956	1.61885	7.89545	3.76266	8.49122	3.30345	2.65758	3.74871	7.60251	3.66362
Dutch	7.44429	5.65419	3.74292	3.68452	6.76804	9.43128	5.59201	10.4492	5.24875	1.6347	4.21224	5.13545	7.88757	12.2198	5.56495	7.52195	10.9554	2.55785	9.77114	4.82758	6.77916	7.43091	9.80306	8.11931	9.44358	8.40052	8.24711	8.62618	1.5842	8.45999	3.74789	2.40673	9.00306	7.84765	6.58833	0.80174	5.82264	6.10365	1.59425	1.85935	1.43487	8.51785	3.66399	8.94392	2.17536	2.55538	4.3018	7.61928	3.64256
Dutch	7.00742	5.05349	3.40832	2.78553	6.44154	8.29166	5.17988	9.45195	5.66241	1.61634	3.49102	5.29049	6.73673	11.1915	4.85731	5.32804	9.7427	1.73035	9.6137	4.92591	5.6528	7.90889	8.64875	6.54136	10.1577	8.03519	5.58284	8.92436	1.62805	7.19788	3.74723	3.15455	8.77735	7.79264	6.07726	0.78183	5.86593	5.81141	0.91347	0.91529	1.21759	7.71897	3.26617	7.27677	2.11423	2.54476	3.14127	6.94651	3.53821
Dutch	8.16578	5.33128	3.76086	3.43362	6.84233	9.66709	7.13206	10.2325	5.4236	1.90168	4.65339	5.87577	7.4457	11.0664	5.54514	5.58341	10.5668	2.54566	9.89585	4.68589	5.72419	8.6721	9.25284	7.78865	9.71184	8.64404	7.02695	9.59942	1.84875	8.0235	6.28853	2.11097	8.75553	8.52935	6.60126	1.08698	6.26247	6.25623	1.61315	1.51189	0.95922	8.0694	3.94141	8.06738	2.47696	3.18076	4.56735	7.53343	3.84422
Dutch	6.82657	5.17264	4.36057	2.82169	6.48057	8.63888	6.47578	10.846	5.88115	1.94655	3.81715	4.81331	7.32305	11.9951	5.20569	5.14187	10.8129	1.88502	9.89232	5.36103	5.7333	8.02546	9.13122	7.52823	10.873	8.29643	6.42083	9.25839	2.12147	7.75464	4.54886	2.15592	9.47839	7.73327	5.43123	0.89825	5.79483	5.16608	1.08216	1.64517	1.15307	7.79872	3.36614	8.348	2.72722	2.55515	5.62155	7.95609	3.56829
Dutch	4.56065	5.01593	2.28522	2.29261	5.73679	8.40091	5.48741	9.697	4.92591	1.37007	3.62427	4.64709	6.33299	10.7242	4.79462	4.82123	8.78583	1.29121	9.41696	4.63853	5.55549	7.64498	8.13917	6.28091	8.90554	7.92095	7.15801	8.72869	1.17687	8.53027	7.39248	2.69883	8.51935	8.04252	5.8778	1.00259	5.69644	5.76103	1.06397	1.56421	0.84551	7.19331	2.79627	7.32146	2.703	2.04297	3.75337	6.62412	3.57444
Dutch	7.9163	5.26531	3.91071	4.0318	6.9277	7.82571	7.25296	10.0919	6.40564	1.92108	4.35126	5.99882	6.77958	11.3887	4.61304	4.73774	9.56499	2.54348	9.69467	5.13331	5.80117	9.80128	8.77057	6.62176	11.0276	8.26925	6.13975	8.99378	1.17258	8.3165	7.47762	2.32706	9.51851	8.49933	5.21297	0.60075	5.97251	4.40364	1.18143	1.20202	1.09369	8.0086	3.1044	8.15589	2.54035	3.29411	4.75035	7.80131	3.84039
Dutch	7.36916	5.48924	4.84862	4.19601	6.12783	8.58663	7.55352	9.43406	4.99475	1.92862	4.25412	5.9135	7.09698	11.4078	5.1169	4.89403	10.7849	1.43758	9.59516	5.08478	5.82565	8.81081	9.10782	6.70568	10.2945	8.53995	6.18466	9.31386	2.3652	6.70448	4.26789	2.44484	8.99996	8.258	5.1934	0.55825	5.5704	5.30293	1.17701	1.61062	1.33469	7.65289	3.23974	7.89738	1.89853	3.36369	4.20546	7.86564	3.61883
Dutch	6.42567	4.7905	1.63186	2.54936	5.80678	8.27885	5.35556	10.158	5.22269	1.62444	3.69865	5.25918	6.64721	10.2955	4.81972	4.04971	9.59679	1.64662	9.99768	5.32608	5.46354	7.35614	8.19036	6.15092	8.80012	7.91156	6.36067	8.81799	1.9588	6.90162	4.09959	2.2921	9.28246	7.9202	6.16784	0.84906	5.83617	5.33118	1.05976	1.56873	1.31003	7.67368	3.08458	7.2601	2.21945	2.1644	3.90092	6.89951	3.53623
Dutch	5.16252	5.02404	2.37208	3.04427	5.48647	7.98503	6.23577	10.3029	5.16227	1.89126	3.76853	5.2738	6.46768	10.6201	4.58349	4.47991	9.33129	2.04616	9.87571	4.82321	5.5051	8.13081	8.38671	6.79949	9.38533	8.10983	5.77914	8.97561	2.16456	8.40458	3.49756	2.05622	8.8743	7.64383	4.95863	0.70165	5.57353	5.4814	0.7335	1.15832	1.10167	7.54187	3.16399	7.06201	1.99013	2.36206	3.96602	6.97234	3.74402
Dutch	6.48268	5.19014	0.65295	2.20495	6.12465	7.90191	5.04574	9.95995	6.50224	1.75553	3.74459	4.81639	6.40063	10.8057	4.66018	4.77453	10.0346	2.04075	9.7163	5.60727	5.57462	5.94441	8.87996	6.46975	6.69185	7.16424	6.7065	9.08284	1.5164	9.08968	3.26111	2.15847	8.8464	7.72436	6.33729	0.67878	5.59479	5.53922	0.98216	1.17703	1.14624	7.93505	3.54595	7.49419	2.15076	1.70811	3.85539	6.33336	3.69658
Dutch	7.63456	5.29895	2.82405	2.94846	6.58008	8.78917	7.06147	9.87127	5.29997	1.48935	3.96676	5.27179	7.16029	11.2868	5.47808	5.74001	10.453	2.21636	9.60094	5.19266	5.62835	8.27116	8.96579	7.0244	9.35903	7.75379	6.77042	8.6836	1.15852	8.25112	6.50065	2.29086	8.34498	7.79364	6.59405	1.20486	5.77877	5.94501	1.55599	1.80153	1.35038	7.55061	3.40672	7.53203	2.80607	2.5669	4.2096	7.03797	3.78028
Dutch	5.40927	5.74958	3.41844	3.50919	5.21958	8.42276	6.48119	9.81963	5.07249	2.02518	4.35103	5.68237	6.38759	11.0273	4.95094	5.34068	10.0736	1.91888	10.365	4.54903	5.38201	9.08161	9.00063	7.59946	10.6942	7.73975	6.82581	8.54259	1.83599	7.88992	5.92035	2.07207	9.18608	7.88161	7.50038	1.13928	5.86681	6.05433	1.02945	2.3284	1.38881	7.98838	3.60214	7.88765	3.22214	2.98968	3.79791	6.67479	3.29451
Dutch	6.57762	5.71352	1.60211	2.65267	6.4675	8.83452	7.08231	9.95594	6.18162	1.88477	4.00179	5.74665	7.03182	11.0718	5.71395	6.02998	9.64072	2.45022	9.91189	5.54546	6.26837	7.65808	8.51081	6.57443	8.46054	8.05153	6.55481	9.66547	2.48824	9.72828	6.10662	2.40549	9.10772	8.34635	6.01731	2.0925	6.46648	5.56504	1.42006	1.6342	1.37768	7.8029	3.38228	7.86729	3.1934	2.0616	4.6273	7.15754	4.03616
Dutch	6.92249	4.7853	2.18008	2.8591	5.97482	11.1319	5.87939	9.60718	5.09931	1.73046	3.48537	5.20988	6.62623	10.8586	5.07388	5.18259	9.42917	1.85896	9.54005	5.0381	5.38094	7.4872	7.75045	6.78249	8.3858	7.83093	5.68638	8.63254	2.10709	8.18032	4.44123	2.1426	8.63049	7.57128	4.31944	0.70432	5.64922	4.7368	1.43208	2.01517	1.23505	7.45767	3.02559	7.77532	2.09125	2.18527	3.81906	6.63251	3.58404
Dutch	7.58811	5.18748	3.47643	3.5273	6.60641	8.3379	5.9288	10.3095	4.80034	2.08842	3.96012	5.49885	6.887	10.9546	5.18743	5.19963	9.52275	2.46932	10.3047	5.19742	5.86327	8.95886	9.18754	8.40945	11.1446	8.07848	6.55911	9.07075	0.86855	7.7542	3.97162	2.37668	9.58664	8.40948	6.46492	0.74488	6.07794	6.13337	1.24215	1.69062	1.18214	8.84172	3.09628	7.51538	2.47152	3.26734	4.22096	7.56739	3.55054
Dutch	6.58816	5.0882	3.16396	3.28347	6.34632	9.78796	5.82527	10.1201	6.19679	1.83708	4.09742	5.71564	6.60857	10.7235	4.71774	4.64365	8.72047	2.12224	9.65642	4.98679	6.13142	8.82809	8.17982	6.95407	10.8946	8.08477	6.51915	9.45446	1.308	9.29653	2.95631	2.63174	9.54061	7.75129	5.81337	1.20025	5.92515	5.04841	1.28454	1.64986	1.01088	7.40075	3.32597	8.37931	2.22857	2.81473	4.68001	7.03946	4.00542
Dutch	7.99033	5.15558	4.05582	3.47936	5.64913	10.1942	6.71153	9.46248	5.45515	1.79597	3.91184	5.16422	7.24161	11.4723	5.3768	5.25081	10.7248	1.7561	9.62313	4.6483	5.3549	9.48415	9.05848	8.09644	10.8054	8.91657	6.99292	8.62671	1.78093	6.63584	3.33227	2.38003	8.50247	8.10888	6.05478	1.0827	5.61669	4.86691	1.30941	2.19224	1.63038	7.46853	4.51482	7.78669	2.31665	3.26716	4.21594	7.19721	3.47685
Dutch	6.68282	4.90607	3.25919	3.41663	5.61353	8.32994	5.40457	10.0669	5.19017	1.42338	3.77196	5.04656	7.25442	11.2542	5.07899	5.03912	9.76483	2.21569	10.4184	5.90089	6.19763	9.20577	8.67701	7.58313	10.5169	8.95826	6.27531	9.26885	1.69824	7.70201	6.07726	2.56252	8.96383	8.23331	5.3586	1.0847	6.0582	5.29185	1.02095	1.29295	1.11199	8.86418	3.17438	7.64809	3.75445	3.37095	4.43705	7.24107	3.58899
Dutch	6.7165	5.01704	2.06493	2.18637	6.23803	9.24335	6.58199	9.90315	6.27568	1.63837	3.87638	4.68712	6.88572	11.0709	5.52523	5.31719	10.7642	2.34495	9.92291	5.67106	5.4919	7.30032	9.12741	7.76671	10.157	7.44162	6.67909	9.12593	1.98085	7.10493	6.13766	3.06531	8.9589	8.11361	6.46245	0.75393	6.07951	6.00167	1.53912	3.01112	0.97277	7.82911	3.22833	8.17254	3.3246	2.65701	3.81916	7.1873	3.81938
Dutch	7.91843	5.22008	3.41268	4.17742	6.56302	8.38246	7.48636	9.60658	5.82808	1.85738	4.28169	5.46186	7.36575	11.1135	5.30679	5.28173	10.5756	3.33446	9.87736	5.25855	5.59541	10.099	8.52865	7.09411	11.6195	8.1891	5.93107	9.35709	2.6639	7.92221	4.72887	1.95334	8.77126	8.25564	6.16981	0.64136	5.99119	5.1433	1.38281	2.1535	1.26537	8.74812	3.03656	7.96763	2.42219	3.89886	4.88025	7.75381	3.85303
Dutch	4.5182	5.62775	2.82054	2.8792	5.33738	7.96112	5.39373	10.2513	5.1645	1.53285	3.29663	4.92307	6.29895	10.7473	4.81649	5.0212	8.39089	2.02414	9.90778	4.9946	5.99572	9.02268	8.5295	7.46485	10.406	9.0818	6.37419	9.04422	1.47083	6.44045	6.03783	2.50233	9.50366	7.32109	5.55519	0.6189	5.29995	5.15552	0.87727	1.89432	1.58068	7.51772	3.41559	7.06379	2.07451	2.72407	3.87855	6.65524	3.40598
Dutch	8.1891	5.91765	2.69873	3.67645	7.06522	9.93896	7.03812	9.36504	5.92955	2.2068	4.88691	6.09821	7.55777	11.342	6.49227	7.57787	11.1777	3.30795	10.1376	5.2203	5.60634	8.81986	10.2282	9.89483	10.1693	8.45909	9.45836	9.10533	2.06595	8.26675	7.12232	2.21813	9.76073	8.73225	7.04941	1.71133	6.0135	5.67513	1.9332	1.18301	1.25161	8.76484	4.14149	9.06788	3.00198	3.01423	4.65216	7.95911	3.70001
Dutch	7.08758	5.3156	3.57083	3.94945	5.8353	9.16309	5.92955	10.3149	6.03548	1.56672	4.46181	5.34102	7.12612	11.3715	4.83987	5.03591	9.15275	2.40586	10.5321	4.76581	5.80817	10.2224	10.4979	8.57778	11.4811	9.75302	7.97736	8.7264	2.44021	6.58533	3.54034	2.74037	9.08502	7.97519	7.19937	0.47408	5.92133	6.20106	1.25601	3.21176	0.94338	8.66975	3.43916	8.05157	4.7643	3.99942	4.69903	7.75838	3.53756
Dutch	6.94782	5.19199	2.91105	3.4068	5.88852	8.57025	5.88032	10.8766	6.14586	1.7771	3.5535	4.69075	7.41816	10.9158	5.12712	5.25376	10.1644	2.18368	10.2385	4.87814	6.47039	9.65332	9.08952	7.61094	11.8653	8.65283	6.57213	9.10309	0.4692	7.26224	5.02645	2.19228	9.48927	8.01113	5.80115	1.38165	5.9518	6.06172	0.89865	1.23088	1.13705	8.48017	3.0433	7.96993	2.26573	3.39931	5.08567	7.39158	3.93584
Dutch	7.19235	4.90606	3.01922	3.33119	6.40758	8.68281	7.31771	9.98023	5.83689	1.66694	3.99197	4.85523	6.39179	10.7391	4.85485	4.88856	9.6314	1.70469	9.80225	4.37673	5.58727	8.59898	8.35782	8.18998	10.7347	7.70299	5.97325	9.15989	1.06248	7.99268	6.121	1.895	9.2154	7.99407	8.53472	1.21356	5.42449	4.77054	0.80186	1.53009	1.12611	7.6101	3.59617	7.52414	4.77088	2.73323	3.87578	7.20453	3.83448
Dutch	6.91249	5.71411	2.11252	2.73418	6.07331	8.71356	5.82722	10.4983	5.59835	1.9644	4.59374	5.75535	7.43646	11.1667	5.50733	5.76189	11.4339	2.63227	10.0767	5.4653	5.76223	9.06983	8.77838	7.23084	10.5382	8.4161	6.57866	9.30709	1.83528	7.9703	3.34308	2.68299	9.64374	8.3897	6.34341	1.06066	6.32156	6.02587	1.42112	1.51659	1.05734	8.61362	3.17992	8.31305	2.81128	2.6745	4.06369	7.58282	4.0323
Dutch	6.12632	5.53682	3.57929	3.69242	5.47709	8.93761	5.80568	10.6135	4.98017	1.70261	3.88649	5.0157	6.77753	11.3309	4.9921	4.9022	9.94287	1.86949	9.75869	4.553	5.47158	8.89813	8.59947	7.35727	10.8228	7.76117	6.60278	8.6887	1.40266	7.61372	6.24402	1.8052	9.50849	7.62096	6.28602	0.99972	5.58656	5.56875	0.95057	1.48198	1.17216	8.1491	3.29428	7.4716	2.07429	2.75207	3.80401	7.64466	3.18669
Dutch	7.01881	5.11128	3.23944	3.71417	5.81325	8.92499	6.49909	10.4071	6.34982	1.73257	4.29259	5.37263	7.60446	11.6121	5.41171	5.49952	10.6326	2.02337	10.0442	5.74234	5.77918	8.34897	8.39895	6.78242	9.17618	8.06229	6.56199	8.92994	2.29554	9.26273	4.49702	2.51959	8.91092	8.08681	7.28241	0.86286	6.08254	5.97557	1.15537	2.63662	1.47493	8.08979	3.18993	7.78214	3.97627	2.20218	4.02023	7.18215	3.6073
Dutch	5.46232	5.40521	3.79768	3.59935	7.02778	8.65922	7.28246	8.65739	6.28216	3.29613	4.56636	6.07381	7.28345	11.5219	5.21554	5.25411	10.3315	2.27279	10.1546	4.9934	6.65745	9.62807	9.41381	9.70655	12.6158	9.99537	7.84079	9.23644	1.34255	7.49039	4.78186	6.03728	9.48727	7.96151	6.84187	1.95163	6.11873	5.85575	1.0684	2.68375	1.77906	8.25927	3.52598	7.37634	2.62862	3.80649	5.50817	7.97325	3.71711
Dutch	6.42308	5.74915	1.529	3.14768	7.04174	8.82529	6.46203	9.85707	6.16477	2.01096	4.39547	6.31779	6.91546	10.8894	5.35698	5.59855	10.0528	2.61936	10.1393	5.02885	6.06535	6.85906	8.54103	6.51037	8.18676	7.48205	6.37683	9.31651	2.35356	9.01648	4.75534	2.07032	9.56138	8.67232	6.4667	1.6269	6.07234	4.6264	1.43227	2.907	1.37723	7.63668	4.21185	8.02615	3.62494	2.44134	4.14595	7.01589	3.93928
Dutch	7.75243	4.78412	6.18148	4.34312	6.19336	9.1436	6.81906	10.8341	6.33574	2.0918	4.56484	5.45509	8.16244	13.0929	5.54219	5.33603	9.65587	2.06682	9.9534	5.10157	6.15364	10.0325	9.61164	8.57297	11.9216	9.14481	6.55726	8.83546	2.8375	8.08589	4.65226	2.06928	8.86102	7.81609	6.16827	0.76622	5.75857	6.07871	1.25652	1.50977	1.11528	7.51411	3.23312	7.92915	3.6378	3.29684	4.40889	9.07077	3.70413
Dutch	7.03944	5.34616	4.57065	3.46053	6.31198	9.28611	6.55172	9.57324	5.77383	1.71408	5.34365	7.20559	7.19642	11.614	5.46171	5.5588	10.6128	2.59912	9.82872	4.78405	5.53058	8.30909	9.54986	7.92385	9.29509	7.2724	7.71624	9.37636	3.23803	7.52804	7.14968	2.17705	9.05543	8.54485	6.66612	1.12341	5.83357	5.79397	1.3425	1.71335	1.67982	8.46771	3.59808	8.52456	3.62342	4.87129	3.86851	7.64277	4.0233
Dutch	5.94662	5.26048	4.69661	4.24128	5.45844	10.011	5.53221	10.2133	5.05212	1.73248	3.62771	4.89395	7.07927	11.8015	4.99221	5.09797	9.1651	1.70545	9.8709	4.76062	5.40842	8.89902	10.393	7.94146	11.4761	8.1176	7.46252	8.77458	1.62012	7.67663	3.3142	2.21145	9.51801	7.9888	5.94489	0.78367	6.06165	5.73647	0.67866	1.74392	1.04963	7.80481	3.39411	7.16686	2.54331	3.09479	3.69559	7.73959	3.48024
Dutch	7.12458	5.61803	3.13495	3.39763	6.13485	8.8831	7.11385	9.26657	6.58645	1.6113	3.83114	4.78105	6.57709	11.0596	5.01535	6.28586	9.35863	2.15827	9.82263	4.661	5.78119	8.3121	8.21802	6.66059	8.99572	8.37293	8.34759	9.14841	3.07592	6.93219	6.17403	2.1963	9.11783	7.62855	6.30744	0.85567	5.62996	5.54279	1.25971	1.118	1.74867	7.93604	4.26465	7.55742	2.17723	2.69612	4.20063	7.09153	3.75746
Dutch	6.77826	5.8353	1.70343	2.8848	6.61387	10.8431	6.68797	10.4554	6.6651	2.05732	4.65665	5.89828	7.17907	11.2041	5.39488	5.39338	10.1669	2.36119	10.02	4.95702	5.79304	7.03317	9.44962	7.02138	7.28374	7.59093	7.24057	9.18402	2.11631	10.6824	5.74592	2.24282	9.30531	10.0723	7.03628	0.63761	5.87812	6.11168	1.48452	1.57966	0.94669	8.3519	3.60635	8.0834	3.50906	5.33104	3.8617	7.02469	3.87635
Dutch	8.45368	5.27747	5.56304	4.14992	6.78449	9.0788	6.74202	10.0838	5.48691	2.00878	4.81799	5.4441	7.63348	12.0826	5.02788	5.54406	10.4999	2.21284	9.73411	5.49344	5.57574	9.56045	8.83781	8.05169	10.1268	9.00119	6.81682	9.09694	2.73425	8.55409	4.80819	2.12317	9.17862	8.32696	6.40952	1.85108	5.89701	4.4333	1.25064	1.69893	1.33766	8.10544	3.31985	8.36299	2.62401	3.21751	4.57456	8.53075	3.65139
Dutch	8.90315	5.67795	4.66492	4.26203	6.33229	8.76058	8.92373	10.4754	6.84337	2.56479	4.67133	6.24678	7.41676	11.8155	5.55072	6.63418	10.5133	2.28196	10.2319	4.88063	5.49571	8.87212	10.5561	9.64256	10.4819	9.37824	9.50542	8.78622	1.27116	9.35852	3.88526	2.6309	9.61802	8.46087	7.00254	1.42177	5.83556	6.13596	1.12066	2.98324	1.996	8.18033	3.76149	8.4544	2.96617	3.87389	5.03775	8.25962	3.3714
Dutch	2.70728	4.89027	2.79704	2.84266	5.1402	8.56804	6.48773	11.2381	6.60052	1.01658	4.35712	5.44698	6.95667	11.1297	5.06263	4.39783	9.26372	2.21049	10.0203	5.58362	6.41712	7.75969	9.57046	7.93906	9.21183	7.36108	8.10134	8.3432	1.32596	8.70474	4.66424	1.96249	9.16615	7.85586	7.64026	0.71282	6.46931	6.27565	1.0414	2.88539	0.46728	8.40902	2.80496	8.08925	3.02442	3.02014	4.2404	6.74853	3.47356
Dutch	5.93693	4.71827	2.69961	2.59936	4.99527	7.79812	4.79766	9.59831	4.73639	1.4779	3.90349	5.28812	6.49194	10.8321	4.66035	4.61062	9.11461	1.53621	9.96646	4.47338	4.91628	7.74475	8.18507	6.07392	9.18756	7.28364	5.39361	8.69551	1.76736	7.44118	3.97937	2.19053	8.82333	7.25389	4.82855	0.75677	5.21378	5.31154	0.73404	1.64881	0.99053	7.2939	2.48871	7.31709	2.18418	2.31496	3.5418	6.41985	3.15129
Dutch	6.82827	5.15586	3.92814	3.0271	5.74061	8.62291	6.03425	9.9361	6.06003	1.41496	3.85154	5.44459	6.90856	11.6185	5.02562	5.18857	9.76718	1.79287	9.56932	5.30736	5.56122	9.2394	8.71316	7.59154	10.5701	8.2584	6.6625	8.87182	1.60213	7.48273	3.76479	2.53236	8.99427	7.80258	6.80589	1.19239	5.9234	5.8025	1.07628	1.40436	1.4224	8.0356	3.28861	7.2749	2.1974	3.18789	4.14077	7.57154	3.2186
Dutch	4.85667	4.75531	3.79329	3.258	5.67779	9.26491	5.9501	10.2644	5.64006	1.82649	3.53227	4.1581	6.83338	11.0285	4.78267	5.2877	10.3	1.44727	9.93483	4.93767	6.20083	8.24221	8.1244	7.49462	10.9024	7.69351	5.95256	9.13583	1.20382	7.39097	2.73508	2.20834	9.35664	7.42101	5.25316	1.20191	5.7119	5.07038	0.85729	1.78464	1.02149	8.37442	3.25453	7.06641	2.02807	2.54128	3.68935	6.67079	3.52905
Dutch	7.11291	5.91744	4.99809	4.50314	7.76218	8.66783	7.45059	10.2982	7.11463	2.85245	5.07635	5.95924	7.7945	12.0747	5.62446	5.22707	10.3459	2.58847	10.2955	5.54101	6.2432	10.0801	10.6518	10.6125	11.5328	9.35049	9.98851	8.98741	1.34297	6.41558	2.80412	4.85215	9.44008	8.24782	8.48791	0.88455	6.00797	6.65178	1.69345	3.27543	1.70025	8.57163	4.44703	8.36709	3.11692	4.1318	5.83145	8.34785	3.78702
Dutch	7.88974	5.19375	4.73338	4.10356	6.01648	8.89191	6.10152	10.4283	6.36115	1.75037	5.0021	5.20084	7.1841	11.9728	5.36888	5.83348	10.4643	2.16009	9.65081	4.61185	5.71676	8.91083	9.72332	7.84799	10.0453	8.04185	7.78531	8.87919	1.96452	7.08585	5.30077	2.52906	8.64323	7.96876	6.18447	0.63884	5.72388	4.89412	1.24464	1.83551	1.71042	8.04656	3.49425	7.68949	3.13365	3.1808	4.38519	7.91334	3.49789
Dutch	6.2902	4.91376	1.87631	2.54784	5.61005	8.98316	5.84288	10.0622	4.87676	1.77033	3.86652	5.1325	6.64225	11.2273	5.14623	4.87559	10.0267	2.00322	9.79574	4.60156	5.26714	7.08444	8.57866	8.18664	7.93517	7.70625	6.66047	9.01025	2.2489	8.06288	4.55172	2.28104	8.68371	7.68456	6.32357	1.15376	5.84434	6.48254	0.94698	1.00203	1.08297	7.18417	3.57865	7.84578	2.48548	2.6591	3.4823	6.7922	3.69888
Dutch	7.41409	5.20329	3.03451	3.56937	6.54547	8.49453	5.60633	9.4745	6.10593	1.95531	4.37613	5.6228	6.92127	11.0324	5.52132	5.79356	11.3672	2.33384	9.792	5.12497	5.41663	9.07022	9.051	7.80949	9.85821	8.60146	6.68257	8.95462	3.02835	8.46081	4.04197	2.64228	8.83232	7.91129	7.93517	1.26647	5.78049	5.72388	1.39327	1.8939	1.84785	9.88985	3.67289	8.09591	3.43204	2.72241	3.94885	7.25993	3.76084
Dutch
Dutch	7.30576	5.0859	3.39113	3.50621	6.24723	9.25766	7.29289	10.7409	5.36922	1.72233	3.84371	5.28303	7.22079	11.1498	5.35282	4.89597	9.76248	2.10336	9.74045	4.57338	5.38045	8.93157	9.65544	7.66396	10.7271	8.54644	7.54388	9.05722	1.80818	7.67441	5.58172	2.22671	8.75642	8.17723	6.69834	2.3296	5.84505	5.87113	0.9868	2.10361	1.50914	8.79296	3.26125	7.92415	2.58903	2.75874	3.75121	7.21587	4.00666
Dutch	7.55331	4.73574	5.13756	4.38306	6.29241	8.59024	6.30797	9.86429	5.85946	1.86309	3.77892	5.36782	7.65232	11.8028	4.95528	5.15546	9.20471	1.9476	9.55513	5.16074	5.63695	9.23781	8.19833	6.75611	11.565	8.39265	6.06269	9.1602	2.2954	8.211	6.0419	2.22204	8.6631	8.01558	5.96148	0.63172	5.71277	5.09861	1.0914	1.84225	1.05561	7.66528	3.2761	7.2861	2.6014	3.04729	4.5133	8.77302	3.809
Dutch	7.1007	4.96529	3.15174	3.07694	6.01451	8.55032	6.0057	9.58687	6.00886	1.65464	3.65003	5.36756	6.81292	11.2208	5.13983	5.67766	9.45999	1.7312	9.58857	4.6205	5.70907	7.88853	8.785	7.33692	8.78371	8.36825	6.62901	9.29353	1.68275	7.29353	5.37212	2.17588	8.57534	7.92889	5.62118	3.01597	5.66031	5.52642	1.44626	1.9997	1.55653	7.39673	3.44307	8.07055	2.1048	2.87646	3.81968	7.23337	4.69644
Dutch	6.89616	5.16508	4.88136	4.11558	6.54213	7.31421	5.55076	9.12592	6.12938	1.91746	3.85749	5.32836	7.03821	11.8545	4.16735	4.0845	8.53216	3.9913	9.61075	5.36722	5.74407	10.416	8.63383	7.59594	11.9208	8.53255	6.48492	8.937	2.25937	6.73251	4.84827	2.74999	9.49173	8.02687	5.80223	0.99034	5.40496	3.56696	1.05785	1.41022	1.25561	7.41449	2.94941	7.78836	3.72066	3.62196	4.47399	7.88716	3.36356
Dutch	7.06263	5.26999	3.14363	3.44793	6.44762	8.30831	6.18365	10.0509	5.87291	2.1189	3.89486	5.35346	6.65488	11.0028	4.91528	5.4822	9.20184	1.70602	9.57678	5.04211	5.4902	7.52316	8.02992	6.9138	9.5107	8.31915	6.35863	9.02172	1.91109	8.86265	3.62061	2.10325	9.04391	8.07682	5.42341	0.9151	5.83579	5.0321	1.51431	1.75464	1.52309	7.3768	3.20578	7.7232	2.4186	2.5169	3.97413	7.51325	3.79745
Dutch	5.07815	4.90398	1.46803	2.28939	5.59745	9.37421	5.52821	8.92994	5.31593	1.69306	3.24963	4.51039	6.69268	10.9863	4.54723	4.41067	9.04514	2.01447	9.7269	5.52065	5.56728	9.43777	8.8529	6.94281	9.33047	8.18354	5.81815	8.9202	1.82139	9.17981	3.07804	2.0363	9.20358	7.78763	7.48717	0.87329	6.11371	5.14953	0.98185	1.2649	0.93051	7.51126	3.59406	7.51066	2.32346	2.70864	4.01894	6.94904	3.6885
Dutch	5.97335	4.9351	2.41131	2.66609	6.2671	8.53274	6.77534	10.0246	6.76196	1.36346	4.12286	4.22199	6.82768	11.2858	5.10661	4.96583	9.51929	2.29845	9.7621	6.26118	5.89056	7.04047	8.9347	5.32323	7.55684	7.77251	6.41209	9.05761	1.60768	8.00079	5.71923	2.68995	9.2186	8.10171	5.9301	3.08817	6.28382	5.55835	1.21822	1.33511	1.07042	7.71505	3.72529	7.68124	2.47799	2.00133	4.37365	6.79241	3.67802
Dutch	7.14853	5.0296	3.19369	3.40548	6.08322	8.77243	6.68495	10.3687	5.83844	1.57205	4.01299	5.39663	6.97252	11.3539	5.47698	5.77284	9.87853	1.91343	9.72431	5.93365	5.31931	9.07172	8.53537	6.80955	10.4451	8.6553	6.83981	8.87197	2.12651	8.63626	6.75662	2.70738	8.94361	8.25118	5.57833	0.95399	6.11388	5.51955	1.25846	2.30206	1.46792	7.87228	4.20047	6.32304	3.88375	2.65195	4.31572	7.21598	3.69566
Dutch	6.60625	5.81053	2.80917	2.32486	6.08367	8.41999	5.64317	10.0253	5.947	1.71382	3.96258	5.23062	6.85848	11.1454	5.1356	4.72137	10.3974	1.80926	9.81992	5.00828	5.66368	7.44974	8.05142	6.92451	9.09521	7.40963	6.306	9.35496	1.59873	9.46117	5.00505	2.28974	9.42513	7.81217	6.26517	0.98091	5.7112	5.28867	1.02253	1.48457	1.09912	8.64963	3.95517	8.28619	2.41409	2.26113	3.75807	7.40704	3.60377
Dutch	6.18799	4.69794	1.50317	2.39803	6.12958	8.06409	6.29026	9.59564	5.1205	1.76379	3.3884	4.79132	6.48504	10.47	5.20853	4.91014	9.55989	1.78194	9.68059	5.45933	5.55555	5.59381	8.29214	6.31252	6.26778	6.816	5.75042	8.91122	1.86764	6.89275	3.99317	2.10772	8.89129	7.53907	5.71215	0.60638	5.45609	5.375	0.83758	1.40935	2.24645	7.39056	3.47254	7.81704	2.12129	1.6981	3.79848	6.87427	3.54049
Dutch	6.94934	4.9454	4.03608	3.66489	6.44258	9.08579	5.9375	10.79	5.35933	2.42601	4.19624	4.91736	7.09479	11.8659	5.17956	5.0653	10.2911	2.4463	9.85771	4.78245	5.49171	9.23204	8.96946	8.51585	9.97515	8.82213	6.47737	9.23161	2.71055	6.28448	4.5151	2.53532	8.4525	8.1683	6.1579	1.42087	5.87021	6.20536	1.5332	1.85237	1.26546	7.96438	3.4605	8.04294	4.81459	3.14085	4.29755	7.53283	3.48322
Dutch	6.15653	5.09093	2.14975	2.87777	6.81413	9.61879	5.99532	9.95132	5.54244	2.08942	3.784	4.91347	6.85962	11.3475	5.14735	5.03028	9.83485	2.78138	9.86447	5.91336	5.9083	9.11771	8.19789	6.97465	10.7351	8.23987	6.40333	9.17049	1.92643	10.2897	4.9163	2.41018	9.4826	8.18265	5.59272	0.91705	6.01888	4.84864	1.64583	1.63393	1.36756	7.69858	3.56548	7.62465	2.87482	2.52216	4.26786	7.01809	3.97585
Dutch	6.55938	5.06787	3.17619	3.09577	6.37617	8.926	6.48077	9.89253	5.89867	1.84477	4.69545	5.81532	7.29446	11.6993	5.27321	5.43957	10.1818	1.81367	9.39525	5.20543	5.50855	7.52871	8.08141	6.45773	8.02943	7.80951	6.86384	9.12011	2.50433	8.12789	5.09489	2.5937	8.48289	7.92369	6.31029	1.01366	5.5551	5.11459	1.26093	1.46157	1.38055	8.03917	3.7468	7.59727	2.39901	2.65004	4.30505	7.28468	3.54981
Dutch	5.58406	4.64606	3.47834	3.01881	5.86192	8.27306	6.2802	9.52449	5.24216	1.92366	4.06893	5.23536	6.59522	11.0899	5.09666	5.07457	9.27522	1.65863	9.80542	4.68283	5.57016	7.58051	8.38494	6.62889	10.5646	7.21885	6.12052	8.78624	1.51666	7.7366	3.89678	2.29446	8.65365	7.40027	5.56438	0.87761	5.78311	5.25237	0.96257	0.90645	1.18089	7.96082	3.22364	7.39113	2.53477	2.61938	3.81928	6.91758	3.37351
Dutch	6.1109	5.24379	2.253	3.00571	5.85093	8.37052	5.59774	10.0054	4.54858	1.67017	3.70507	5.49896	6.66112	10.6403	5.01059	5.27922	10.7297	1.39625	9.38135	4.83463	5.42442	6.78248	8.10422	6.82174	8.06236	7.1448	5.76872	8.53205	1.8019	7.13764	1.78897	2.29682	8.62705	7.58719	5.41151	0.5465	5.39853	5.21255	0.99972	0.91957	0.77739	7.37441	3.32905	7.12552	2.14124	1.77709	3.35274	7.50287	3.30285
Dutch	7.67579	4.71559	4.58499	4.02162	5.89395	9.0779	6.17043	10.1877	5.09	1.99214	4.22186	5.58544	7.68928	12.0881	5.52957	5.30451	10.2496	1.91827	9.71122	4.61508	5.42784	9.88486	9.06316	8.58228	12.4559	9.68942	6.6536	8.86199	1.34459	7.95242	5.95516	2.48931	8.70213	7.94837	7.29551	1.2455	5.84754	6.32577	1.20128	1.64154	1.65761	7.79538	3.55507	7.87986	3.26646	3.12413	4.24491	7.76764	3.67653
Dutch	6.57025	5.05195	3.64364	2.89143	6.38208	8.73999	5.94524	10.3586	5.67905	1.51262	4.08126	4.31079	7.59506	11.553	5.28465	5.178	10.3699	2.37608	9.6414	5.0434	5.44648	8.5524	8.13419	6.67093	10.844	7.49192	6.44822	9.07421	2.25941	8.09692	5.64752	3.01164	9.13517	7.75212	5.64197	0.82565	5.45892	5.35803	1.33586	1.42821	1.88728	7.87137	3.26568	7.834	3.13667	2.14328	4.45932	7.40934	3.69794
Dutch	6.4861	5.07851	2.7435	2.46701	6.32912	7.66939	5.61755	9.24149	5.01555	1.40605	3.54303	6.00469	6.60363	10.9326	4.56436	4.34396	8.75457	2.1516	9.60131	4.53062	5.06708	8.64676	8.14742	6.67432	9.92038	8.05585	5.46371	9.05627	1.73285	7.87134	2.88856	2.0977	8.61421	7.79328	5.69705	0.77558	5.53196	3.70709	1.00698	1.10498	1.47392	7.89077	2.58006	7.77257	2.44373	2.8232	4.262	6.87437	3.44967
Dutch	7.1176	4.85337	3.75499	3.52187	5.62483	8.93963	6.75527	10.2088	5.03731	1.57856	4.75432	6.11109	7.73614	11.395	5.42997	5.9504	10.5708	2.35519	9.91219	4.63411	5.72864	9.85789	9.43682	8.03698	12.2697	8.56538	7.16333	8.81912	1.60594	7.91796	5.10391	2.40948	8.40719	8.01041	6.79774	1.18638	5.83117	5.48006	1.28117	1.88901	2.41018	8.00785	3.65391	7.87385	2.6783	3.63045	4.35684	7.78155	3.54369
Dutch	7.13166	5.30171	3.96002	3.0714	6.34113	9.00794	5.65631	9.83084	5.73559	1.55409	4.24696	6.10619	7.14425	11.8256	4.89803	4.33184	9.89171	2.18174	9.69198	6.05403	5.63469	8.94491	8.72298	7.6114	10.1288	8.30947	6.50505	9.28604	1.80448	8.55061	2.65998	2.18667	9.2772	7.94666	6.43805	2.03156	6.02313	5.64078	1.28852	1.16292	1.37192	7.48846	3.10255	8.23114	2.52844	3.24804	4.87422	7.43926	3.44683
Dutch	5.78314	5.16773	3.56856	3.57525	6.17617	8.29348	6.10668	10.3296	5.38875	2.08937	3.75112	5.13584	7.39946	12.5249	4.8014	4.44323	9.91091	1.73251	10.2524	4.32252	5.74358	8.54077	8.8819	7.5341	9.39386	8.02426	6.51282	8.9144	0.9022	7.72121	5.38582	1.98906	9.7434	7.75293	6.12613	0.68069	6.16395	5.48717	1.17851	1.23303	0.65442	8.19796	2.51323	7.32268	2.57313	2.99243	4.65958	8.13298	3.79543
Dutch	7.66708	5.28989	4.09128	3.50843	5.91153	9.122	6.272	9.30028	5.40294	1.60722	3.94121	5.35133	6.95092	11.4386	5.20074	5.44119	9.36006	1.97044	9.78086	5.2538	5.85327	7.52351	8.90656	6.84913	9.10374	8.5306	6.5015	9.11135	2.94737	8.22942	4.71204	2.38571	9.05599	8.1967	5.59886	0.82425	5.77513	5.08251	0.96962	1.77918	1.38663	8.01424	3.27811	7.55191	3.30432	2.65304	4.53365	7.21789	3.42354
Dutch	8.65812	5.11142	4.51761	4.03606	6.42362	9.03799	6.68828	10.5001	6.05145	1.77725	4.68211	6.36901	7.34304	11.7774	5.09337	4.8349	9.8394	2.4318	10.236	5.39214	5.71965	10.5598	10.5688	9.70404	11.3782	8.1284	8.17658	9.27771	2.63351	8.11732	4.12991	2.82806	8.67508	9.33496	7.55999	1.29147	5.98056	6.06805	1.29642	2.32159	1.13648	8.91811	4.74734	8.3572	4.89072	4.26156	4.30283	8.86741	3.65621
Dutch	6.95062	4.92334	4.0135	3.66816	6.45873	9.92102	5.84965	10.255	5.61229	1.50633	3.50761	4.90393	7.09357	11.1984	4.60817	4.78939	9.43572	1.74292	9.48133	4.93157	5.24138	8.60618	8.42571	6.92702	9.97613	7.72184	6.50067	8.69194	1.62908	6.75089	4.19672	2.20133	8.89827	7.82176	5.32904	0.82508	5.63743	5.03736	0.9272	1.17194	1.19061	8.06949	3.18038	7.79862	2.66009	2.70567	4.10813	7.35558	3.41113
Dutch	7.91811	5.73171	4.42412	3.43799	6.11445	9.66253	6.60886	10.1005	5.21994	2.00602	3.86312	4.9494	7.27086	11.6786	4.59637	4.13048	9.27676	2.07048	9.43594	4.97046	5.61455	9.76227	9.22355	7.03338	11.8237	8.15802	6.32553	8.92624	2.51957	6.93837	5.41568	2.73695	9.30571	7.96123	6.71633	0.96825	5.82017	5.4649	0.8724	1.16512	0.8249	7.59255	3.07703	7.09544	2.39362	3.1308	4.39329	7.73436	3.67741
Dutch	7.56669	5.50958	4.00519	4.14041	6.08727	9.02941	6.44584	9.9469	6.34181	1.67254	4.63282	5.98701	7.78452	11.6667	5.58662	6.1678	9.89543	3.36291	10.0222	5.47727	6.10522	10.1353	8.93801	7.3134	11.0656	8.74513	5.90036	9.1995	2.38754	9.54409	6.0677	2.28369	9.16955	8.59877	6.05609	1.70783	6.30565	5.49485	1.25514	1.8772	1.18033	8.77797	3.33838	8.55021	3.22813	5.33622	4.72536	8.05949	4.10949
Dutch	5.65806	5.12006	3.70853	4.23434	6.40995	8.18919	6.4453	9.63291	6.54581	1.77891	4.16786	5.54552	7.56793	11.8747	5.30552	5.47979	10.3929	2.19028	9.79856	5.28779	6.49326	9.74648	9.46797	7.925	10.6569	8.96848	6.97531	9.22229	1.84244	8.98033	2.88536	2.60119	8.85758	8.12281	5.86641	0.47502	6.04109	5.46923	1.38698	1.65242	0.53958	8.74254	3.26447	7.18547	2.83819	3.09891	4.64161	7.71177	4.11304
Dutch	7.91689	5.11436	3.50333	3.19794	6.72376	9.53537	5.92283	10.2356	6.44626	2.33779	5.29431	5.56504	7.32555	11.8034	5.81467	5.40626	9.30979	3.3683	9.96067	5.85721	5.74624	8.19192	9.18834	7.14626	9.33643	8.01408	7.27038	8.83174	2.05543	10.3581	6.61285	3.03245	8.81841	8.68366	6.44794	1.40021	6.61446	5.22435	1.90201	1.93759	1.40209	8.95764	3.98597	8.41889	5.21361	2.46626	5.05714	7.63764	3.54228
Dutch	8.07442	5.47123	3.08343	3.3663	6.68516	9.30067	6.39069	9.77727	5.93924	1.64974	5.09049	5.68073	6.99697	11.3694	5.33726	4.51347	9.21919	2.18247	9.49023	4.65837	5.59246	9.55164	9.5786	7.79117	10.7384	8.51376	7.08655	8.97229	2.12002	9.92438	4.89913	2.5335	8.93884	8.08836	7.05948	1.02385	5.72352	5.18369	1.35477	1.80898	1.19061	8.55047	3.3229	7.8317	3.23689	3.23466	5.12045	7.5733	3.68942
Dutch	5.97081	5.51631	2.14086	2.28659	6.24578	9.17389	5.65477	9.80603	5.47515	1.93767	4.21749	5.80264	6.3758	10.7571	5.17169	5.27197	10.2922	2.55067	9.91264	5.10685	5.29991	8.07091	9.32417	7.54792	8.3327	7.68721	6.70019	9.08887	2.1314	6.14685	1.97573	2.23392	9.0784	7.73036	6.06925	0.87943	5.70869	6.45827	1.38471	1.41687	1.1152	7.71173	4.09733	8.27217	2.46306	2.57027	3.59555	6.98683	3.65872
Dutch	4.45632	4.85241	2.38163	2.57047	6.28468	9.1115	6.27699	10.1751	6.02069	1.83851	4.30918	6.0971	6.97405	11.1501	5.29623	5.04578	10.1391	1.69876	9.86324	4.68771	6.36753	7.1185	9.40147	7.36997	9.38931	7.27999	7.97806	9.01617	1.31559	7.72547	7.04079	2.45612	9.73473	7.92561	6.11531	0.89859	6.13458	6.07824	1.13396	1.71473	1.16427	7.83488	2.9549	8.12455	3.07303	2.42258	3.87288	7.20005	3.98422
Dutch	4.42114	4.41775	1.72945	2.33258	5.84699	8.67729	5.55594	8.89722	5.88479	1.42823	3.81784	4.53056	6.35736	10.6377	4.9332	4.1843	8.99654	1.61983	9.93049	4.58217	6.22623	6.97216	8.47323	6.42967	9.38174	6.64093	6.43854	8.68041	1.03402	8.01536	5.99536	1.9814	9.66351	7.02546	5.94886	0.57211	6.25253	5.45448	1.18892	1.58743	0.8127	8.00935	3.27502	7.41981	2.15489	1.84346	3.70092	6.4809	3.6284
Dutch	6.66324	5.6928	1.56817	2.88699	6.62282	8.80549	7.11415	9.74639	6.17395	1.59584	4.35988	5.36983	7.05319	11.3546	5.78042	5.28065	9.57068	2.43088	10.0064	5.20664	6.24636	6.47757	8.90045	6.4387	7.14447	8.01593	6.65188	8.93222	3.37587	9.12405	5.77219	2.6322	9.09523	8.27699	5.97709	1.05862	6.05444	6.6298	1.52508	1.23243	0.76499	8.26405	3.52812	7.85696	3.48932	2.55546	4.08742	6.87982	3.86729
Dutch	3.82275	4.71991	1.98269	2.41757	5.25685	8.21489	5.7789	9.95995	4.66008	1.61842	3.20951	4.46783	5.64343	10.9514	5.04845	4.67566	8.71834	1.84686	10.0292	5.35443	5.94723	7.52087	8.59763	6.64731	9.06744	6.69034	6.05633	8.38095	1.06197	7.72329	3.65921	1.80864	8.9064	7.55722	6.19853	0.7152	5.86165	5.01085	1.13057	1.69519	1.02645	7.83219	2.92487	7.42923	2.62595	2.28499	3.4067	6.57846	3.32435
Dutch	7.51356	5.232	4.03666	3.84294	6.74188	8.28826	7.12182	9.77861	5.64932	1.67517	4.26575	5.72979	7.19884	11.3155	5.37799	5.65763	9.64056	2.02175	9.72095	5.62168	5.7295	9.06616	8.60732	7.48627	10.0715	8.31247	6.33683	9.2708	1.70834	7.53169	4.84767	2.27297	9.0336	8.16196	6.41419	0.74755	5.97829	5.24127	1.35144	1.75436	1.71746	7.74748	3.46964	8.01962	2.35612	2.80626	4.19906	7.69209	3.61279
Dutch	4.83039	4.80253	2.69328	2.95967	5.62751	9.98675	6.17597	9.91376	5.6446	2.2987	3.88144	4.92227	6.35539	11.1351	4.83962	5.08745	8.4001	2.33392	10.2209	5.49173	5.88328	8.47475	8.50682	7.3511	9.58193	7.31788	6.72154	8.70681	1.79056	6.58375	3.21997	1.69734	9.39626	7.72948	6.10527	1.43359	5.78638	5.88857	1.06287	1.58759	1.10058	8.48817	3.07186	7.38367	3.44612	2.35182	3.77436	6.84704	3.08128
Dutch	5.50078	5.58603	3.31215	3.34611	6.69081	8.89919	7.65196	10.6213	5.65745	1.85679	3.99113	5.32049	6.90996	11.3561	5.10309	5.13901	9.64977	2.48178	9.9074	5.73553	6.50308	8.656	9.96879	7.83711	9.97101	8.18425	6.50233	9.28226	1.58358	8.5201	4.06653	2.58205	9.61687	8.05107	6.80219	0.91287	5.99669	6.13813	0.97828	1.97445	0.84682	8.12377	4.01604	7.90546	2.69226	2.58186	4.28096	6.81798	3.97568
Dutch	7.42815	5.35213	4.00274	3.64799	6.08753	9.10693	5.84369	9.99844	5.94612	1.89168	4.18404	5.23603	7.18789	11.4722	5.22978	5.96449	10.5073	2.19597	9.79908	5.07267	5.93969	8.99841	8.67639	6.85667	11.041	8.2046	6.21211	8.91325	1.49191	7.77679	4.24119	2.3487	9.09706	8.0712	5.4678	1.12209	5.8138	5.54755	1.40655	1.36234	1.08483	8.21994	2.92456	7.69448	2.53525	2.60215	3.93976	7.54384	3.69747
Dutch	4.54646	4.6721	2.34045	3.0864	5.94324	7.77611	5.0936	9.64199	5.37656	1.47997	4.57903	5.45534	6.65511	11.1216	4.69357	5.56907	7.92651	3.33331	9.66029	4.65396	5.96299	7.93576	10.2178	7.86227	9.24842	7.68645	7.80243	9.01166	1.55208	7.30921	3.69173	1.73076	9.66613	8.11654	6.55901	0.73328	5.81119	4.51462	1.27939	3.13963	0.95234	8.05592	2.67288	7.6533	2.97821	2.68265	4.57636	6.64541	3.9598
Dutch	6.36418	5.31288	3.38862	3.72267	5.81368	8.36714	5.91075	10.3962	4.93862	2.0431	3.88818	4.9951	6.7881	11.5348	5.23091	5.21069	9.61854	2.45519	10.2373	4.7901	5.95048	9.03548	9.06124	7.76449	10.759	8.81775	6.55236	9.05233	1.65007	7.63843	3.70314	1.82342	9.34855	7.97083	5.72698	0.60443	6.23408	6.37129	1.01555	1.67338	1.30211	8.18536	3.86873	7.80146	3.21866	3.21903	4.23076	7.24748	3.84179
Dutch	6.67667	4.7836	2.07688	2.86834	6.98815	7.4669	6.08778	9.13604	6.28104	2.1709	4.27242	5.53846	6.46282	11.1029	4.43651	4.50163	9.23314	2.89655	9.75963	5.11968	5.45085	6.90766	8.78147	6.44961	7.11021	7.22385	6.58782	8.6984	1.68017	8.45406	6.14544	4.29344	9.24151	8.35105	6.05754	0.76366	5.89224	5.20903	1.33304	1.37991	1.47383	8.48162	3.4399	7.8774	3.05304	2.08489	4.00089	7.17943	3.51639
Dutch	6.07315	5.98782	3.07457	3.04182	6.13743	8.7439	5.83013	9.89911	5.89964	1.59153	3.92009	4.95166	6.6535	11.1834	4.69119	4.87989	9.65268	1.69008	9.57039	4.6008	5.61298	8.0466	8.09739	6.86503	10.0935	8.07588	6.41034	9.05156	2.28191	8.961	5.73796	2.35812	8.78091	7.71881	5.66219	0.66078	5.71329	4.9835	1.12513	0.98809	1.51509	7.96463	3.45094	7.96405	2.58276	3.08187	3.69727	6.83201	3.59397
Dutch	7.52778	5.48399	3.28397	3.53003	5.71934	8.39771	5.85375	10.1215	5.87661	1.51034	4.14643	5.03526	6.88121	11.2916	5.03496	4.95182	10.0797	2.11844	9.55679	4.98861	5.63473	8.48416	9.13673	7.14615	10.1122	8.31843	6.92221	9.12153	2.40607	7.97829	4.84378	2.56225	8.61739	8.29797	5.65845	0.65169	5.49247	6.09302	0.85619	1.3309	1.28569	7.96705	3.37637	7.23033	2.63453	4.22644	3.90879	7.13569	3.59632
Dutch	7.53627	5.11018	2.81888	3.4238	5.96253	8.67728	6.99555	9.56642	5.12954	1.6371	4.33645	5.76021	6.62365	11.037	4.68281	5.0665	9.23798	2.54194	9.56151	4.78116	5.00102	8.32298	9.08771	6.69207	10.7286	7.67205	6.26708	9.0896	1.30188	7.51323	6.28442	2.78144	8.36303	8.08046	6.66034	1.4384	5.46291	5.13793	0.84241	1.68226	1.15415	8.41308	3.33885	7.32056	2.67917	2.8591	4.26977	7.133	3.35485
Dutch	6.30621	5.03723	1.35898	2.40815	5.91136	8.2522	6.49952	9.42739	5.56764	1.44536	4.05481	4.82584	6.96981	10.903	5.17206	5.17064	10.3229	2.39738	9.5955	4.97335	5.21087	6.79342	8.38439	7.33093	7.45373	7.77577	6.84121	8.99592	1.64653	7.42714	5.87518	2.57648	8.70745	7.83496	5.72906	1.47286	5.9363	5.04395	1.1749	1.28021	1.36941	8.12302	3.45788	8.55587	2.8704	2.27694	3.57654	6.62663	3.68398
Dutch	3.07556	5.81689	3.70679	3.28586	5.61369	7.97965	7.32508	9.99962	5.46637	1.1163	4.48355	5.56779	7.04978	11.1977	5.32151	5.23313	9.3528	2.39355	9.68011	5.21767	6.08645	8.59178	9.35517	6.88255	9.86652	8.34194	6.18067	9.21118	1.71091	8.36207	5.55749	2.26053	8.48376	8.27642	5.45785	0.70011	5.93487	5.27794	1.15555	1.4898	0.56498	8.20121	2.82457	7.91669	2.80586	3.80892	3.9007	6.59925	3.59192
Dutch	5.84509	5.27846	3.08374	3.23414	5.61974	8.39816	5.90788	10.057	5.54631	1.62392	4.10882	5.38659	7.11763	11.523	5.29168	5.15836	9.65819	2.63796	10.0666	4.97212	5.84303	10.1306	8.61327	7.20821	13.17	8.71829	6.03593	9.13499	1.94556	8.89391	4.15874	2.1906	9.30596	7.96506	6.11915	1.81809	6.02147	6.0726	1.05224	1.46344	0.78479	8.40679	3.2739	7.76371	2.49793	3.77697	4.16894	7.38402	3.7443
Dutch	6.7803	4.64051	3.23092	2.95417	6.4561	8.45746	5.12558	9.68024	6.36826	1.98861	3.83878	5.10037	7.07562	11.152	4.93546	5.17881	10.2429	2.78363	9.8	5.62801	5.92634	7.18112	9.50966	7.07835	8.35466	7.25769	6.64507	9.08985	2.00039	8.43814	5.60013	2.54554	8.99513	8.3751	6.19056	3.04779	5.81847	5.49307	1.47605	1.37073	1.32599	8.10321	3.64614	6.9867	2.63818	2.25507	3.92568	7.46172	4.00283
Dutch	3.60045	5.2959	1.41672	2.89566	6.53659	8.91891	5.89024	9.04298	6.06308	1.52099	4.49693	5.01133	7.17141	11.122	5.22534	5.11591	9.2613	3.10465	9.88369	4.90041	6.30299	8.22566	9.96413	7.51684	9.15845	7.78043	7.2605	8.86542	1.86783	8.95918	3.54068	4.47745	9.01096	8.049	8.08606	0.74274	6.24385	5.15571	1.42977	1.8848	0.96335	8.27424	3.40743	8.01858	2.60992	2.65494	4.5254	6.62586	3.67543
Dutch	6.41059	5.31143	2.59026	2.75084	6.4631	7.23183	6.20338	10.4096	6.11147	1.84854	4.07189	5.1444	7.01579	11.03	4.62554	4.50452	9.79088	2.17015	9.79667	4.73872	5.7197	9.70845	8.50108	7.423	10.5903	8.60262	6.29265	9.20266	1.81722	9.01298	4.2916	2.05222	8.84734	7.74034	5.06961	0.7509	6.06059	4.70805	1.19709	1.31351	1.25561	8.35307	3.63317	7.38052	2.06526	2.90972	4.5279	7.2281	4.57286
Dutch	5.39609	5.43606	2.84282	2.88821	5.6115	8.46301	6.27363	9.97687	4.97899	1.95922	4.02033	4.52822	6.6975	11.0732	5.05698	4.74843	9.51673	1.83523	10.0928	4.91952	5.9914	8.57977	9.31577	6.91134	10.4831	7.91333	6.20179	9.03571	1.23402	8.91564	4.17024	2.1185	9.53194	7.40655	6.1334	3.06417	6.52685	5.91312	1.06446	1.40812	1.03713	8.40818	3.18059	7.64631	2.08278	2.96692	4.25286	7.1437	3.27925
Dutch	7.44443	5.19457	2.17385	3.54653	7.02571	9.15101	5.65814	9.73371	5.83586	2.35256	4.28372	5.64661	7.28069	11.4474	5.1443	5.33494	9.9157	3.5244	9.88303	4.85768	6.12826	9.17437	10.3468	8.55579	12.277	8.7027	7.81629	9.02506	1.68382	9.90184	4.9107	2.40498	9.55896	8.54201	7.81845	1.13063	6.01519	5.46305	1.79184	2.00789	1.32115	7.777	3.55303	8.31722	3.92501	3.02943	4.89868	7.53742	4.07693
Dutch	5.84106	5.43209	3.53631	3.73512	5.55598	8.5062	6.55515	9.71906	6.02012	1.51591	4.47948	5.3329	7.10762	11.4027	5.05128	5.11153	9.37843	2.49347	10.2089	5.25342	5.71748	9.66514	9.09523	7.76493	11.905	8.86066	6.75165	9.2634	1.24808	8.99899	5.02351	2.46228	9.54955	7.80492	6.50198	0.72259	6.14029	5.91885	1.50338	1.96256	1.22062	8.073	3.1559	8.05096	2.96719	4.11733	4.26253	7.57055	3.66841
Dutch	7.20334	5.75816	2.18296	3.14351	6.56644	9.11722	6.08418	10.1761	6.88892	2.34468	4.83301	5.78905	7.20564	11.0057	5.26399	5.61377	9.33946	3.91641	10.1949	5.24346	6.1605	9.24374	10.0398	7.94205	10.5109	8.24107	8.01195	9.19133	2.21458	9.55054	4.58693	2.22232	9.22855	8.37105	7.22799	0.89494	5.86076	6.18989	1.70017	1.57506	1.28935	7.71337	3.7589	7.88034	5.18127	3.08424	5.19824	7.12735	3.9273
Dutch	7.48591	5.35832	2.89173	3.21783	6.03799	8.37754	6.25185	10.341	4.91044	1.98447	4.54609	5.42141	7.07382	11.0699	5.09885	5.45212	9.93866	2.41517	10.1055	4.52926	5.92593	8.35125	9.10269	7.44734	11.0207	8.2563	6.43086	9.34608	2.19434	5.45393	4.2423	2.17203	9.0507	7.87	6.49771	1.19927	6.44839	5.20207	0.80647	1.37857	0.88507	7.98863	2.97797	8.6715	2.78557	2.761	4.51608	7.42298	3.88246
Dutch	6.69267	5.88724	2.56585	2.86282	6.47906	8.91603	6.66166	9.78225	5.20937	1.89351	3.65319	5.37938	7.22529	10.8541	5.28861	6.61457	10.9827	2.27097	9.84663	4.56393	5.79952	8.72481	9.64724	7.59595	11.0823	8.62984	6.82478	9.134	1.66507	8.20948	2.30809	2.68216	8.8019	8.30347	5.85876	2.18082	5.27758	5.58286	1.18737	1.70524	1.04719	7.72907	3.91415	7.77883	2.70425	3.07778	3.93611	7.22963	3.64616
Dutch	6.06513	5.86712	2.35518	2.3262	5.81978	8.11455	6.14117	9.54541	4.56441	2.04578	3.53341	4.15442	6.54712	11.0942	5.2051	4.66692	9.88225	1.69935	9.85614	5.51244	5.99685	9.00343	7.80699	7.40194	9.76884	7.35208	5.82	8.58049	1.67513	6.60815	3.0949	2.82954	8.85098	7.48719	5.09355	3.86236	6.13256	5.30713	0.9961	1.26501	1.50456	8.44111	3.08779	7.33003	2.11382	3.3189	4.00308	7.1363	3.39635
Dutch	6.34732	5.25272	2.6568	2.82684	6.28587	9.62395	6.69738	10.0773	6.16011	2.41597	4.05627	5.85038	7.02818	10.874	5.30147	5.36439	10.1476	2.41093	9.89446	5.812	6.0179	8.15046	9.34355	7.70577	9.77897	8.52001	6.86814	9.33201	1.71769	7.93806	5.97124	2.51994	9.03755	8.06285	7.20175	1.04126	6.05015	5.52255	1.28961	1.31961	1.23635	7.74478	3.16288	8.12692	2.84132	2.99416	4.54324	6.91608	3.77219
Dutch	8.77206	5.37362	5.58604	4.07874	5.63399	8.82194	7.30686	9.91793	5.25815	1.95518	3.99815	5.12759	8.10926	12.3104	5.18518	5.0764	10.3548	2.04229	9.95154	5.45697	5.49531	9.54418	8.69826	8.33335	12.1871	8.23685	6.83084	8.87762	2.29811	6.77189	4.1247	2.47251	9.15211	8.05655	5.7292	0.98619	5.48319	5.24906	1.0865	1.61377	1.39565	7.91569	3.27773	8.10374	2.75223	3.63034	4.38191	8.48901	3.26791
Dutch	6.86564	4.8615	2.69845	3.23595	6.20271	9.38353	5.44531	9.25057	5.09787	1.86803	4.47317	5.64311	6.96305	10.8121	5.38824	5.67293	10.4002	2.08546	9.57789	5.182	5.7037	8.32401	9.75427	7.92762	9.92056	7.87829	7.52748	8.81304	2.0346	9.12843	5.17581	2.38582	9.29662	7.46465	8.08509	0.92511	5.6133	5.52117	1.02129	1.75132	1.26911	7.38412	3.78199	7.22022	2.31185	2.40513	4.89952	6.93081	3.33974
Dutch	5.09371	5.18958	3.88169	4.24131	4.7784	8.23727	6.05293	10.1107	4.07327	1.50242	3.69437	5.02522	7.34942	12.047	5.02877	5.61298	10.0826	2.78803	9.64482	4.29888	4.99969	8.79791	9.86306	7.43462	9.67561	8.59085	7.72323	8.82697	2.33506	6.49033	6.54769	2.03786	8.55416	7.66962	7.92957	0.69526	5.52802	5.87316	0.82362	1.17556	1.05679	8.26712	3.05788	6.68588	3.08241	3.01887	3.59073	7.53853	3.02618
Dutch	2.76839	4.95233	1.92297	2.90902	4.44817	8.51867	7.40611	9.58282	5.10429	1.2321	3.57187	4.79864	6.75903	10.9968	5.04839	5.95008	7.29227	2.36434	9.85549	4.92789	5.49274	6.79948	8.6892	6.96174	8.07423	6.64288	6.62709	9.01522	2.00557	8.59584	2.40237	2.29562	9.52076	7.90207	7.01916	3.61949	5.58176	5.02073	0.72229	1.3545	1.01107	8.24326	2.82364	8.58129	3.0104	2.05708	3.27803	6.50312	3.64809
Dutch	8.02686	5.67074	4.33754	4.28896	5.32609	9.52583	6.52959	10.499	5.85971	1.89538	4.3504	6.04269	7.3695	11.5702	5.17706	5.67517	10.5435	2.74175	10.2801	4.87195	5.74388	9.99078	10.856	8.68187	11.2163	8.6858	7.69621	9.03442	2.11007	7.05255	3.0572	2.06179	8.7414	8.43479	8.50678	0.7584	5.6746	6.23577	1.25494	1.61666	1.03925	8.26508	4.45897	7.95625	3.55648	3.57719	4.58134	7.65001	3.63325
Dutch	5.66955	4.5892	2.24065	2.77279	5.79041	7.70824	5.21683	10.1001	6.19367	1.8305	3.62785	4.70309	6.85477	10.5601	4.79254	4.3324	9.30416	2.17098	10.0515	5.05791	5.73321	6.71678	8.81228	6.42114	7.59842	6.39153	7.62314	9.02849	1.68673	8.32469	3.23183	2.16614	9.24402	7.26403	6.84996	0.61479	5.91025	5.1967	0.93237	1.50833	0.97885	7.71042	3.25138	7.51725	2.00265	2.2313	3.75943	6.49198	3.40352
Dutch	7.1054	4.82051	3.88768	2.93163	6.96612	11.763	7.55112	10.5289	6.12857	2.01891	5.19071	6.38537	7.04567	11.2885	5.09066	5.56674	9.6344	3.04648	9.65773	6.04568	5.14512	9.04106	10.0023	7.94872	11.5679	8.76742	6.93644	8.908	2.18221	9.79468	5.53733	2.57182	9.7028	8.32038	5.98388	2.7033	5.86261	6.24811	0.86023	2.13132	1.2677	8.26075	3.19471	8.33354	3.35199	2.84924	4.56191	7.55935	3.33459
Dutch	9.79049	5.66268	5.59069	4.68353	6.7865	8.52604	6.84436	10.4942	6.62735	2.29284	4.56708	6.16584	7.48743	11.8648	4.93634	4.94662	10.7819	2.33232	9.81804	4.95396	5.68425	10.668	8.53365	7.40234	11.5576	9.38291	6.33442	9.10236	2.42115	7.84186	6.04016	2.34512	8.93225	8.26918	6.04278	1.37636	6.11102	5.06508	1.47728	1.95741	1.1962	7.85203	3.18915	8.25584	2.66667	3.47135	4.68386	8.65741	3.7254
Dutch	7.00759	5.16708	4.33929	3.72136	6.57575	9.03542	7.16626	10.1427	7.04401	1.64097	3.73195	5.24611	7.23213	11.4969	5.39181	5.80501	10.8493	2.30693	9.95245	5.334	6.25184	9.3231	9.2336	7.50623	9.91015	8.96086	7.51534	9.19646	1.32981	10.3125	5.69654	2.5045	9.06666	8.07898	5.46331	0.73154	6.04697	5.33522	1.58879	1.38909	0.89247	8.34404	3.70528	8.32	2.74628	3.13747	4.72873	7.3876	3.87147
Dutch	4.10169	5.27901	2.0794	4.03009	5.45556	8.48021	6.97409	9.51985	5.28963	1.45232	4.00584	5.04334	6.83404	11.1897	5.27653	5.15905	7.42888	1.76721	9.92602	5.04175	6.38072	8.34034	8.72858	6.27876	9.4594	7.83896	6.23881	9.16965	2.24995	8.31188	3.61653	2.14164	8.49537	8.17877	6.43629	0.26608	5.62166	4.95285	1.13654	1.25619	1.321	8.31856	3.2262	8.24093	2.95199	2.70478	3.95965	6.76087	3.90032
Dutch	6.19861	4.95025	2.40712	2.66603	6.40013	7.96912	6.29053	10.3789	5.42007	1.85652	3.60321	4.97424	6.81589	10.8878	5.01129	5.41439	10.0676	2.23952	9.5798	5.2002	5.85805	8.37069	8.89894	7.01169	11.6992	8.20957	6.43549	9.07773	1.57372	7.12593	2.96376	2.15875	8.75167	7.97034	6.25303	0.77369	5.64441	6.06532	1.00509	2.02359	1.08889	8.20768	3.43602	7.42305	2.40322	2.59497	4.18166	7.38022	3.62923
Dutch	4.52803	5.1843	2.83625	3.42654	5.48632	8.81166	5.72932	8.89981	5.31672	1.36912	3.527	4.97066	6.95846	11.3259	5.0316	5.02672	8.12261	1.83268	9.30186	4.73006	5.52441	8.73501	8.42849	7.56298	8.79785	6.9906	5.63298	8.65887	2.53143	8.90196	7.09189	2.37447	8.67366	7.79793	4.74537	0.71908	5.75918	5.84344	1.0704	1.42142	1.40527	7.33077	2.96798	7.58045	2.53197	2.24368	3.74672	6.95148	3.33758
Dutch	7.55898	5.1802	2.79993	3.23502	6.47618	9.48078	6.39564	9.60194	6.47515	1.64425	3.79654	5.1186	7.26715	11.4134	5.5903	6.30251	10.1677	2.53726	9.65109	5.21634	5.6531	7.73913	9.01628	7.25431	9.82171	8.21233	6.47724	9.14817	1.16747	9.8289	5.81317	2.42012	8.90941	8.27692	5.82776	0.91594	5.98908	6.41554	0.82835	1.44822	1.09068	7.73383	3.15183	7.52419	2.45849	2.36744	4.03675	7.46088	3.67758
Dutch	6.91134	5.52255	2.93592	3.20933	6.34594	9.21565	6.27027	9.89009	6.36194	1.90554	3.93374	5.27295	6.84327	11.2965	5.2846	5.35275	9.95219	2.27615	10.058	4.99774	6.29545	8.64366	9.58296	6.848	9.31775	7.45561	6.20243	9.01378	2.54289	8.58962	4.9199	2.83865	9.05514	8.2543	6.71156	1.27635	5.95646	5.40547	1.43228	1.478	1.87566	8.13343	4.0881	8.35631	3.48508	2.46311	4.26483	7.27083	3.90554
Dutch	8.84675	4.85944	5.3147	4.62057	6.11748	9.89914	7.35782	10.7792	5.60736	2.33625	5.98658	7.48639	7.85757	11.8768	5.43963	5.7738	10.3823	2.19969	10.0779	4.94182	5.88517	9.85716	10.9527	9.48706	10.0309	9.1967	10.2581	9.13339	2.85171	7.99733	5.43026	2.69222	9.28026	8.66317	9.07313	1.21912	5.8947	6.19049	1.44162	1.9881	1.61993	8.33178	3.53711	8.03468	3.56163	3.07417	5.09669	8.12235	3.62363
Dutch	7.56585	5.13769	2.53197	2.99195	5.76747	8.64006	6.24891	10.0622	5.87764	2.14435	3.96397	5.17905	7.2326	11.3141	5.57715	4.9681	10.5271	1.81964	9.60368	5.71455	5.72492	7.47712	8.885	11.592	8.05203	7.64735	6.89244	9.09174	1.5857	8.12519	5.42655	3.00174	8.47209	7.80967	5.86258	0.48492	5.76457	5.86173	1.24665	1.89189	1.06896	8.10352	3.03018	8.43921	2.75368	1.99125	4.45639	7.0682	3.76063
Dutch	8.00931	5.5923	3.10031	2.81293	7.02346	8.43978	5.5834	9.85981	5.99412	2.04826	4.63131	6.17284	7.37134	11.304	5.11343	5.59568	10.8303	2.35055	9.88382	5.24097	5.8393	9.60248	9.31671	8.33017	11.7854	8.38927	6.50862	9.43019	1.45921	7.218	4.45658	2.8633	8.94689	8.60958	6.14664	1.17823	6.08328	5.44129	1.29755	1.95192	1.13087	8.23219	3.48122	8.51818	2.30538	3.65863	4.80577	8.14509	3.7939
Dutch	6.1935	5.03993	2.31563	2.56851	6.72028	8.93396	6.64146	9.63924	6.28839	2.03353	3.87608	5.68171	6.7627	11.0777	5.2056	5.16145	10.2726	2.092	9.86191	5.43114	5.89671	7.56449	8.588	6.4658	7.74298	7.52058	6.44678	9.30933	1.65953	7.92124	5.59827	2.55902	8.80253	7.94028	6.21749	1.00346	5.92168	5.69859	1.27479	2.49959	1.23668	8.0096	3.35796	7.85006	2.69723	2.28749	3.92128	7.09118	3.86853
Dutch	9.20998	5.96535	3.20464	3.47852	6.23946	8.97881	5.50366	9.95201	5.97647	1.43216	3.64748	5.45554	7.1706	10.8201	5.19108	5.61522	10.1496	2.09851	9.57115	4.38946	5.42845	8.69901	8.26367	7.02578	11.1176	8.75233	6.13735	9.28388	1.66664	7.67084	6.09146	2.16635	8.49625	8.24739	6.01878	1.53958	5.85242	4.88312	1.32694	1.67811	1.34576	7.70372	2.98711	7.71815	2.69745	2.78561	4.48108	7.30719	3.6029
Dutch	7.69733	5.09483	3.61067	3.33713	6.27343	8.82969	6.20991	9.87637	5.44866	1.92345	4.03009	6.11016	7.22819	11.5448	5.04006	4.90774	10.1047	2.04452	9.54208	4.89769	5.1278	7.93026	7.95333	7.09324	9.16782	7.94038	6.13986	8.66627	1.78787	7.57147	2.32045	2.21988	8.43462	8.06358	5.37112	1.1227	5.64727	5.28284	0.99407	2.56526	1.19276	7.32962	3.51985	7.74715	2.28834	2.90168	3.92704	7.21793	3.42433
Dutch	3.82865	5.191	2.49185	3.13581	6.67175	8.33426	6.54678	9.85217	6.52443	1.72956	4.61754	5.44301	7.07302	11.1329	4.89997	5.50244	8.0295	2.95646	9.88796	5.46738	6.08756	6.22884	8.58137	7.10888	7.43558	7.17543	6.33755	9.17714	1.81227	8.0422	5.09779	2.2818	9.35932	8.57573	6.17853	0.36288	5.9269	4.47679	1.26904	1.53185	0.98886	8.69908	2.75746	8.13644	2.68379	1.87091	3.51853	6.69815	3.80069
Dutch	7.00175	5.02968	2.21131	2.95241	6.06553	8.50095	6.88069	10.6725	6.23657	1.77558	3.96888	5.29606	6.89757	11.0088	5.40569	5.09638	9.64541	1.88216	9.47174	4.86974	5.77374	6.77242	8.47062	7.2424	7.32239	7.50073	6.50205	8.68328	1.92011	8.60949	2.41979	2.09845	8.98101	7.6766	5.99911	4.66024	6.10165	4.84441	1.48393	4.11446	1.22798	7.59629	3.08471	7.56794	2.66024	3.42391	4.04602	6.91622	3.54789
Dutch	5.54128	5.62388	2.79639	3.61563	6.17901	10.5868	6.14131	9.92907	5.74186	1.51571	4.53782	5.70756	7.63666	11.2711	5.54378	5.57656	9.18684	3.31165	10.08	4.88705	6.03969	7.65081	9.71952	7.13749	8.39464	7.87541	6.70189	9.17397	2.66386	7.30721	5.3805	2.36963	10.071	8.42746	5.93681	1.19846	6.0779	5.19288	1.31271	1.30989	1.39827	8.66102	3.81245	8.63196	4.08534	2.0965	3.87489	7.00264	3.73906
Dutch	6.01717	4.98621	4.21597	3.38319	5.41427	8.96112	7.7485	9.68516	4.91745	1.80135	3.5636	5.01703	7.00365	11.171	5.07052	4.79419	9.03148	1.79245	9.89216	4.71046	6.20919	10.575	8.72126	8.66682	11.4043	8.24139	6.10866	9.01828	1.25786	6.60035	2.39795	2.47391	9.03619	7.6161	5.92523	0.3961	6.1486	5.96612	1.15262	1.52649	1.03256	7.47326	3.56272	7.18155	2.42967	3.07676	4.57351	7.273	3.54562
Dutch	7.2408	4.96802	2.13944	2.85198	6.62868	8.39863	5.78976	9.81499	6.21815	1.94843	3.82188	5.33144	6.75428	10.6248	4.93321	4.5852	10.1291	2.00579	9.53317	4.66913	5.45649	8.65043	7.88558	6.72254	10.4213	7.81301	5.91449	9.06425	2.47916	8.70097	5.58968	2.6409	8.94218	8.00785	5.62653	0.61967	5.4695	5.73247	0.87914	1.55823	1.03337	7.86035	2.91467	6.73454	2.73644	2.83522	4.11785	7.40998	3.71482
Dutch	7.44101	5.04977	2.76544	3.30574	6.11482	8.18509	5.45076	10.3524	5.94144	1.9122	4.04419	5.22547	7.2424	11.247	5.25387	5.32315	10.0475	1.95538	9.61114	4.98351	5.54726	8.54054	8.56126	6.75511	9.26643	8.15385	6.45883	9.03641	2.43773	6.85401	6.39779	2.18861	9.0745	8.11669	6.03164	0.95065	5.9705	5.46175	1.50558	1.90194	1.63262	7.91965	3.52031	6.96989	2.22398	2.68581	4.0359	7.07468	3.88629
Dutch	4.96401	4.86794	1.51941	2.27005	6.10878	8.71002	4.98174	9.84303	5.4786	1.80257	3.89656	5.18131	6.858	10.994	5.19289	5.47198	10.6811	2.19827	9.57885	4.81742	5.66614	6.71283	8.79414	6.19946	7.15658	7.02927	6.09671	8.81045	1.97725	7.74214	3.1693	2.22142	8.20773	7.69342	5.70488	1.07641	5.81461	5.66243	0.79796	1.47238	1.09803	8.00761	3.13355	7.63485	2.06986	2.27392	3.63045	6.61019	3.53738
Dutch	5.88496	4.70756	1.86043	3.13376	6.12285	8.02771	5.62198	9.50582	5.51004	1.7249	3.17163	4.50914	6.68564	10.8837	4.96616	4.80928	8.17581	1.48712	9.30193	4.6054	5.16306	7.197	8.93921	7.3518	7.9744	8.08699	5.69948	8.70142	1.60223	7.92814	4.32373	2.03192	7.9386	7.62839	5.31172	1.13015	5.27576	4.56516	1.01933	2.1129	1.0566	7.11945	2.41569	6.70741	1.95231	1.72126	3.57689	6.68096	3.34442
Dutch	8.06991	5.16488	2.47801	3.52695	6.76771	8.56045	6.4998	9.60073	5.75874	2.07785	4.04358	5.23811	6.99161	11.2472	4.95987	5.234	9.94186	2.92157	9.53732	4.91375	5.32692	8.06051	8.85598	6.60396	9.21022	7.95809	6.66631	9.02965	2.34508	7.92268	5.97312	2.00115	9.50191	8.4086	6.2852	1.30248	6.10776	4.7123	1.18998	2.0025	1.6212	8.12959	3.51017	8.27915	2.755	2.44372	4.79319	7.24347	3.89828
Dutch	5.15802	4.9503	3.79157	3.56289	5.91098	8.40202	8.41562	9.61035	5.60723	1.6155	4.11932	5.66209	7.43636	11.0469	5.42375	5.64371	8.83227	1.94134	9.86883	5.5536	6.03064	10.1963	9.06592	7.76633	11.6768	8.44951	6.52984	8.77159	1.34645	8.35978	2.87365	2.22409	9.14388	7.82076	6.27544	3.7256	6.19165	5.49746	1.27947	2.50918	1.32684	7.74839	3.06209	7.93533	2.7051	3.30194	3.86609	7.79819	3.79653
Dutch	6.20692	4.99995	4.36257	3.4718	5.48129	7.85287	4.962	10.4498	5.21811	1.4281	3.67922	4.5902	6.96892	11.8215	4.93636	5.00363	10.2018	1.60433	9.71228	4.49733	5.16021	9.42851	8.59953	6.59548	9.90316	8.74352	6.00535	8.52398	0.73818	8.53493	4.06027	1.94363	8.66713	7.176	4.94163	0.40459	5.64965	5.67295	0.85619	1.46333	1.17836	7.56395	2.62276	7.19533	2.13193	3.01965	4.16284	7.57175	3.14767
Dutch	4.65526	4.85766	1.50199	2.73513	5.5291	8.16625	5.38708	10.0043	5.96859	1.34317	4.12533	4.8131	6.68586	10.4716	4.89668	5.16478	9.2862	1.81769	9.63472	5.07532	5.44434	7.10111	8.80473	6.30421	7.76241	6.75195	6.38891	8.66442	1.04193	7.90419	4.7713	2.15037	8.85609	7.50136	5.93023	0.63658	5.38796	4.95298	1.18047	1.65991	0.87393	8.0728	3.10619	7.11512	2.19014	3.6492	3.81507	6.6478	3.18882
Dutch	5.88143	5.54317	3.76886	3.21696	6.19431	7.70296	7.12115	9.70826	5.04384	2.0895	4.03684	5.1793	6.71784	11.0416	5.07111	4.93169	8.90876	1.74251	10.2092	5.10149	6.21567	8.41775	7.57162	7.04564	10.2908	8.06382	5.68348	9.0173	0.60999	8.82579	5.69217	1.99497	9.22348	7.67701	5.75364	0.76151	6.22609	4.75575	0.87761	1.56081	0.93669	8.52174	3.18574	7.21237	2.41444	3.46164	5.16827	7.75776	3.33177
Dutch	8.06063	5.50061	3.63244	3.59864	7.42012	8.85502	6.56646	10.4791	5.5707	2.19409	4.74469	5.90783	7.16785	11.5736	4.94245	5.35784	10.2518	3.50563	9.86594	5.765	5.87152	9.99684	10.0417	9.52795	12.7989	9.57067	7.30346	8.96857	1.8057	9.6856	4.97597	2.31733	9.68046	8.50661	6.56986	1.02463	6.15462	4.67138	1.58291	1.732	1.04974	7.80521	3.96354	7.96592	3.27417	3.27665	5.14728	7.8635	3.70063
Dutch	7.8635	5.25163	3.82416	3.53848	6.36491	9.10245	6.34229	9.95018	5.44531	1.60963	4.27203	5.19966	7.09572	11.2938	5.16466	4.66681	10.6561	2.77748	9.97307	5.29656	5.80209	8.24335	9.65564	8.66012	8.65235	8.40929	7.67087	8.96042	1.27623	7.50617	4.1659	2.28478	8.72922	8.20577	8.4245	0.81401	5.90476	6.5378	1.42352	1.53127	1.19882	8.57226	3.91943	8.62198	3.30521	2.95803	4.85253	7.74379	3.57974
Dutch	7.00715	5.34522	3.27086	3.01874	6.73994	8.01541	5.92183	9.3807	5.64844	1.70951	3.94175	5.24094	7.05553	11.7691	4.49995	4.48428	9.50964	2.95529	9.34366	5.21561	4.9553	8.4753	8.6635	7.11538	9.1226	7.98924	6.47014	8.938	2.22841	8.65723	4.95709	2.3224	9.19157	7.88621	5.9787	1.06261	5.22595	4.90025	1.45411	1.63044	1.10476	7.47575	3.18253	7.84239	2.51938	2.61472	4.36532	7.13231	3.35446
Dutch	6.83586	5.19897	3.89683	3.58603	5.83142	9.69448	5.47254	9.92079	5.71533	1.32749	4.20235	5.33826	7.21675	11.3236	4.74699	5.42452	9.64763	1.73452	9.66282	5.61244	5.59711	8.12702	8.53381	7.50826	9.47456	7.91875	6.1275	9.16318	0.92412	8.90093	5.01085	2.62506	8.87872	7.83278	6.62009	2.32612	5.66117	4.67247	1.16041	1.66868	1.16597	7.40884	3.82887	7.93973	2.66938	2.21912	4.2537	6.95501	3.4519
Dutch	6.62983	4.8258	2.44464	2.77999	5.58251	8.65124	5.28107	9.84853	5.0332	1.38824	4.06169	5.04405	6.58239	10.8026	4.99156	5.11919	9.78461	1.5847	9.86094	4.86467	4.87646	6.92764	9.81459	7.36957	7.23647	7.17307	7.05491	8.66593	1.60317	8.06297	4.63011	1.9936	8.8951	7.36818	9.72231	0.58607	5.86874	5.0462	1.05448	1.95668	0.83441	7.97935	3.52394	6.93041	2.8784	1.81595	3.63223	6.76486	3.34578
Dutch	3.80951	4.87458	1.72505	2.17457	5.4009	7.99454	5.40148	9.86796	4.89881	1.58945	3.51882	4.38194	6.60509	10.6896	4.62171	4.67834	9.0415	2.229	10.0165	4.77009	5.77286	6.01298	8.23771	5.96354	7.4681	6.94181	5.20542	8.63526	1.14608	8.50334	5.0934	2.19866	9.17253	7.20422	6.26218	0.477	5.81303	5.07312	1.15105	1.44911	1.12671	7.90015	2.7166	6.75201	2.11767	5.58081	3.4203	6.35618	3.5011
Dutch	6.60179	5.48131	1.75361	2.57921	5.51897	9.31635	7.12078	10.0299	5.45284	1.517	3.6477	5.16467	6.88212	11.1163	5.65212	4.89702	10.9315	2.11619	9.77165	4.58299	5.84077	6.38655	8.80788	6.70637	7.7257	10.3027	6.5883	9.01827	1.51842	8.18453	3.72296	2.16035	8.88471	7.40852	6.15716	0.86847	5.85168	6.16184	0.96608	1.78082	4.02655	7.45504	3.37669	7.62136	2.10616	1.69176	3.59846	7.01177	3.60185
Dutch	7.61297	4.97472	2.73604	3.35651	5.88345	8.59049	5.47527	9.54151	5.74101	1.75857	3.81233	5.21999	7.03595	10.7757	5.13101	5.22238	9.53006	1.92255	9.62405	5.44231	4.97181	7.5924	8.98822	7.45307	9.68041	8.00072	6.88974	8.89592	3.26871	7.90108	3.51962	2.20578	8.66878	8.18528	6.60382	1.46622	5.88357	5.4268	1.21501	1.75868	1.25705	8.27536	3.69122	8.06302	2.79923	2.79473	3.4745	7.11135	3.50973
Dutch	6.0498	4.889	4.16205	3.67397	6.20639	8.7404	6.42837	10.5839	6.46111	2.14642	4.2718	5.1534	7.32945	11.8424	4.7416	5.16525	9.72938	1.85417	9.99296	5.01766	6.22777	9.26563	10.2362	7.55479	10.3225	8.34467	6.94251	8.95154	1.51411	9.73046	4.69608	2.37942	9.11073	7.74898	7.15558	1.07388	5.91751	5.63413	1.09435	2.77242	1.22734	8.07383	3.41443	7.41194	3.13826	2.7052	4.69845	7.39079	3.70181
Dutch	6.12515	5.49111	3.75606	3.96311	6.1872	9.30438	6.75546	9.76031	6.96528	1.72717	4.71737	5.28353	6.45509	11.6563	5.46346	5.08922	9.88957	2.3308	10.0066	5.45666	6.35155	8.43969	10.8349	8.07683	9.274	7.46652	9.54563	8.8922	2.51655	7.52885	4.9134	2.38712	8.6782	8.35076	12.3064	0.80264	5.77564	6.31435	1.4906	1.52873	1.34299	8.14522	4.63772	7.79672	5.46751	2.7212	4.43824	7.37692	3.87492
Dutch	6.46709	5.93508	3.01887	3.13744	6.12645	9.55358	5.64312	10.2433	5.65812	1.73702	3.91689	5.36857	6.79907	10.856	5.18995	4.86371	10.1408	1.93009	9.57244	4.39865	5.53387	8.57043	9.11163	6.51786	9.89239	8.36317	6.21189	9.03219	2.06905	7.14512	3.44292	2.0867	8.77933	8.15172	6.8769	0.6288	5.73108	5.66824	0.75555	2.1188	1.18846	8.05527	4.02289	8.07895	2.42018	2.46798	4.14617	6.78584	3.42711
Dutch	6.21305	5.17054	3.68807	3.41181	5.68584	7.83294	4.94207	9.56364	5.19666	1.70805	3.45098	4.89995	6.44611	11.1805	5.30709	5.26406	9.31347	1.65126	10.1665	5.2403	5.75723	8.5995	8.07944	6.82346	10.5965	8.41371	5.73458	8.59847	1.57555	8.48354	5.87696	2.06652	8.62939	7.41003	5.57071	0.70972	6.19126	4.47265	1.0857	1.3	1.03993	8.4179	2.77736	8.01107	1.85584	2.95289	3.68264	7.02745	3.65224
Dutch	10.9175	5.39799	2.59109	4.22739	7.23393	9.36229	6.87828	10.2857	6.311	2.18474	4.40518	6.70049	7.68663	11.565	5.29993	5.04576	11.0267	2.57372	9.89569	4.87229	5.80822	8.62893	8.78764	9.01562	10.6355	9.43548	7.0815	9.32472	2.49424	9.32962	5.44995	2.51247	9.21697	8.95353	8.03028	1.30377	6.34703	5.11291	1.59621	2.16907	1.46175	8.18743	3.55356	7.90843	2.88065	3.27009	4.86023	8.93813	4.03412
Dutch	5.34994	5.33799	2.92808	3.42826	5.54471	9.87403	7.03934	10.1422	6.39208	1.7894	3.71418	4.7088	7.02385	11.072	5.38304	5.33536	9.38765	2.07831	10.2166	5.02301	6.14238	8.61062	8.92201	8.01397	11.5084	7.64109	6.87277	8.91173	1.71555	9.64304	4.80954	1.93841	8.934	7.60681	7.77018	0.53025	5.93904	5.55371	1.03413	2.11449	1.21159	8.24445	3.36849	7.64977	3.68884	3.4277	3.7949	7.45339	3.48383
Dutch	6.37342	5.06999	2.67389	2.98862	6.05195	9.25036	7.11093	10.4935	5.94567	2.04611	3.98369	5.60703	6.62074	11.0262	5.265	4.77429	9.67257	1.89975	9.66608	4.52421	5.31286	7.49948	8.87143	6.90041	10.0826	8.19386	6.16561	9.29568	1.87783	6.44041	3.99568	2.20344	8.899	7.75131	5.97859	0.91621	5.67547	5.51257	1.19797	2.25537	1.44679	7.4438	3.3515	7.50835	2.29121	2.7087	3.74771	7.21392	3.68825
Dutch	7.56503	5.42724	3.02775	3.44914	6.75922	8.98915	6.77992	9.97108	6.67972	1.56231	4.31914	5.7236	7.08329	11.3573	5.64431	5.55711	10.7087	1.78272	9.78056	5.39906	5.81419	8.3057	8.3292	6.67016	10.6749	8.35555	6.49379	9.13763	2.15084	6.7663	2.83931	2.30387	8.83174	8.10821	5.64378	1.04877	5.93411	5.97944	1.30852	1.92247	1.87851	8.03603	3.56433	8.2275	2.34821	2.29794	4.30149	7.25354	3.55814
Dutch	4.90825	4.76954	4.31481	2.92809	6.33476	7.34675	5.63258	9.64397	5.94238	2.21334	4.07077	5.91383	6.5476	11.4393	4.99498	5.03033	6.83805	3.28492	9.57626	5.44641	6.51876	8.95604	9.02612	8.1563	10.4085	7.53857	7.05526	8.70992	1.72472	8.72435	4.20148	1.98164	9.72249	8.28659	8.14844	0.82517	6.11199	4.81535	1.34967	2.18399	1.18063	8.11578	2.69997	7.29661	3.3027	2.69583	4.32669	7.59606	3.85404
Dutch	6.36496	5.39072	3.18431	3.14489	6.60783	9.16941	5.87375	10.7168	5.66649	1.70186	4.21939	5.80995	7.38586	11.0585	5.49917	5.26059	10.762	2.30131	10.0874	4.94261	5.82498	9.6541	8.70721	7.46216	10.906	8.82882	6.42101	9.44268	1.77016	7.98175	6.48689	2.41635	9.2684	7.82746	6.24412	0.69707	5.92301	6.06033	1.18048	1.81162	1.05603	8.03142	3.25237	8.14511	2.56146	3.31476	4.44409	7.60723	3.69256
Dutch	8.60017	5.44062	4.9466	4.05592	6.67817	8.89906	6.76201	10.1366	6.00828	1.86937	4.53506	6.39174	7.5113	11.7214	4.93877	5.61802	9.04612	2.23928	9.61376	5.65438	5.40318	10.8912	8.64651	8.1943	11.4658	9.15596	6.57977	8.94003	2.92869	7.58107	5.91945	2.45383	9.03384	8.42516	5.95113	1.04274	5.64363	5.46835	1.18541	2.56735	1.53078	8.01242	3.49374	7.72426	3.52058	3.3919	4.76731	7.80387	3.86383
Dutch	5.72103	4.92758	3.28503	2.86632	6.06366	8.55981	9.61258	10.4062	5.61001	1.77552	4.18351	5.22775	7.13735	11.4385	5.20496	5.14463	9.39429	1.97032	10.0604	4.33657	6.12032	9.58997	9.48695	9.38746	13.2174	8.18024	7.10792	9.0378	1.30209	7.75924	5.6779	2.0595	9.21871	7.86443	6.29948	0.40212	5.91642	4.86659	1.17608	4.31331	0.97454	7.87589	5.05729	8.06971	3.31968	3.58572	4.97188	7.69037	3.70682
Dutch	5.01499	5.3368	3.14361	3.1806	5.32005	9.62096	5.61497	10.3595	5.3198	1.67217	3.91741	4.50751	7.06585	11.0469	5.14472	4.98442	10.9638	1.76153	10.1991	5.20772	5.76284	9.80769	8.23756	6.75202	11.5732	8.22507	5.70411	8.83366	2.12545	7.18798	3.37193	2.55159	9.09381	7.72532	5.88845	1.16438	6.03565	5.12524	0.92281	1.52099	1.20354	8.04005	2.96416	7.87807	1.83522	2.53853	3.96928	6.93076	3.31237
Dutch	7.5573	5.29609	3.35392	3.44738	6.20692	8.32528	5.62518	10.1099	6.89705	1.43833	4.2865	5.33154	6.77642	10.9227	5.02274	5.45308	10.3625	2.17307	9.60908	4.90415	5.21136	7.64994	8.34746	6.71394	9.02154	8.16315	6.50702	9.23739	2.69581	7.56175	3.66334	2.34496	8.9717	7.67602	5.84479	0.5802	5.87258	5.74372	1.29547	1.37516	1.27566	7.92661	3.51685	7.65896	4.41381	2.76937	3.53075	6.88307	3.76355
Dutch	7.18211	5.37779	2.05892	2.77581	6.43039	8.72082	5.67956	10.4032	5.23436	1.59427	4.19036	5.32983	7.27632	11.1892	5.21903	5.23796	9.19847	2.66698	9.74504	4.61078	5.49126	6.54832	9.97551	7.33632	8.30321	7.12177	6.91939	9.1668	3.11322	8.10647	3.56391	2.46497	8.81351	7.84027	5.71004	7.10358	5.84528	6.29939	1.0742	1.37056	0.8461	8.0762	3.31328	7.98348	2.47123	3.83693	3.82406	7.08898	3.67637
Dutch	4.26404	5.11543	2.19236	2.83563	6.03902	10.6603	9.61071	9.84622	6.41151	1.79879	3.74972	4.62941	6.9136	10.6126	5.07882	5.31399	8.97828	1.99107	9.73434	4.97262	6.39422	8.08926	8.45913	7.36015	9.22997	7.38301	6.23362	9.24105	1.65351	8.83331	3.82284	2.08073	8.99063	7.96332	5.77122	0.70956	6.08772	5.76908	1.20097	1.60315	1.41112	7.59774	3.18042	8.60437	2.33538	2.68506	4.02432	10.3881	3.87666
Dutch	5.86705	5.47646	2.11665	3.39341	5.85339	8.78101	6.55451	9.87949	5.70898	1.85683	4.02114	5.59945	7.54202	11.0927	5.43631	5.6571	10.4211	2.42548	9.69027	4.63731	5.52032	7.83493	10.0644	7.86188	8.33925	8.38874	7.11185	9.19563	2.36077	6.31271	2.93377	2.17391	8.75997	8.02919	6.28189	0.75894	5.72566	6.00696	1.2393	2.08532	1.36521	7.96726	3.34512	7.68819	3.06285	2.09154	4.1648	6.94022	4.05035
Dutch	7.05575	5.09669	1.97662	2.7777	6.43826	9.38477	6.438	11.1046	5.73222	1.77279	3.96545	5.37914	7.2272	11.2279	5.24138	5.79129	10.4578	1.96599	9.94418	6.11041	5.84956	7.7925	8.6051	7.0438	8.14441	7.55746	7.87636	9.22941	1.52965	8.87345	5.13509	2.44784	9.46747	7.7435	6.39526	1.2446	5.37064	5.44543	1.24269	1.88476	1.35766	7.43269	3.18619	7.64395	3.1958	2.28655	4.61135	7.09326	4.00843
Dutch	6.48483	5.55014	1.3817	2.44853	6.25285	9.11604	5.57061	9.82607	5.18229	1.60716	4.33797	5.90056	7.14352	10.8537	4.87675	5.38254	10.0679	2.78114	9.80943	4.78578	5.14353	6.23208	8.65602	6.42921	6.98568	7.51705	6.27624	9.32779	2.18507	8.19188	4.67314	3.50588	9.23693	7.79614	6.52231	0.72161	5.50582	6.21482	1.00167	1.23496	1.12169	8.20031	3.5075	8.18687	2.91139	1.63424	3.81223	6.91262	3.81588
Dutch	9.51742	5.75617	5.44017	4.93012	6.60555	8.92459	5.80822	10.1842	6.27071	1.8388	4.54632	6.38007	7.35303	11.5938	5.03505	4.59573	9.86547	2.0248	9.62744	4.8861	5.26774	10.5756	8.64644	7.56671	12.0765	9.10258	6.22814	9.14049	2.56238	8.04182	4.91989	2.46085	8.82027	8.13251	5.56269	1.41792	5.71563	5.52437	1.18948	1.60863	1.16259	8.25639	3.654	7.66105	2.65689	3.71766	4.38785	7.64585	3.28184
Dutch	8.81325	5.35951	4.97311	4.23319	6.64738	7.61075	6.06519	10.1094	6.07451	1.94406	3.62524	4.87526	7.04232	11.3921	4.96684	5.10829	9.43232	3.43324	9.88778	5.13403	6.10483	10.2862	8.71557	7.00056	11.6489	8.49549	6.66895	9.24819	1.08265	7.85455	4.56877	2.01638	9.76597	7.8523	5.80323	1.4556	5.61706	4.63418	0.80932	1.54943	1.49045	8.33902	3.33866	7.99882	2.5738	3.16748	4.67529	7.74346	3.88633
Dutch	8.83518	4.99361	5.21439	4.39854	6.21255	8.94392	5.59205	9.03589	4.89768	1.57875	3.78438	5.71887	7.21132	11.6604	5.00547	5.07199	10.0339	2.01924	9.59739	4.87265	5.027	10.4064	9.10835	9.18874	11.7228	9.49661	6.36501	8.90422	1.28227	6.77796	4.01466	2.93789	8.77051	8.1467	6.88206	0.55889	5.5581	5.64109	1.05353	1.43717	0.90606	8.1517	3.15759	7.25667	2.25027	3.23538	4.16044	7.69863	3.35682
Dutch	6.71008	4.97613	3.29034	3.18616	6.2953	9.36009	6.19266	9.99655	5.9879	1.76679	4.23328	5.75479	6.88362	11.122	5.44007	5.09298	10.4856	2.15537	9.81651	5.26409	6.3206	8.81689	8.60554	6.91348	9.30562	8.05592	6.28523	8.9941	2.01559	8.5254	3.7364	2.28858	9.60643	7.91143	6.84512	0.90198	5.7706	5.39902	1.00249	1.86164	1.4049	7.75295	3.8549	7.66228	2.53621	2.87629	4.23044	7.22252	3.93903
Dutch	5.40606	5.21206	3.58712	3.0542	5.51289	8.20139	6.24532	9.73754	5.48949	2.45626	3.54157	4.7844	6.92589	11.0759	5.19111	5.05525	9.95234	2.17173	9.95899	5.40135	5.79915	10.5925	9.06055	8.98318	10.9748	8.13258	6.33095	8.85492	1.44061	7.10709	4.57183	2.01298	9.17841	7.92706	4.96046	0.99995	5.90947	4.95509	1.13761	1.79026	1.38119	7.74677	3.0991	7.37282	2.40761	3.52064	4.23067	7.39239	3.34824
Dutch	5.38869	4.9125	1.83903	2.52243	5.34292	8.02817	5.04468	10.1911	4.87164	1.14618	3.7081	5.05219	6.41358	10.1491	4.90535	4.81964	9.52548	1.9374	9.84265	4.99145	5.30562	9.1839	7.84194	6.45781	10.2331	7.76085	5.9308	8.62152	1.64219	7.27631	5.84526	1.99187	8.62575	7.05131	5.34053	0.5548	5.43259	5.02576	0.87103	1.3233	0.8455	7.93973	3.09942	7.34113	2.00797	2.84205	4.0621	7.09571	3.33734
Dutch	5.89978	5.3505	3.00064	3.05455	6.00061	9.52016	5.95415	10.7458	4.58927	1.72257	4.47096	5.5001	6.7878	10.7837	4.85815	4.68736	10.9907	2.10992	10.2041	5.30356	5.58212	7.5342	9.02799	6.85253	9.79617	8.33719	6.68422	8.92554	1.50076	7.71631	3.97212	2.43187	9.26014	7.37532	5.89257	0.7907	6.09783	5.75232	1.15641	1.58344	1.08812	8.47053	3.28775	8.69541	2.21822	2.47966	4.25947	7.18046	3.46479
Dutch	8.76375	5.2057	3.27189	3.95434	6.21857	7.64827	5.62249	10.1917	5.85196	1.94979	4.41013	4.71696	6.96765	11.3098	5.13141	4.90126	10.9516	2.69723	9.70898	5.31501	4.99503	9.16339	9.41692	8.71285	9.93779	8.18795	6.37582	8.9111	3.37674	7.42462	7.58063	2.47298	8.98052	8.1444	5.38548	0.95718	5.26579	5.373	1.24478	1.26472	1.44047	8.17204	3.06116	8.46428	3.53038	3.09439	4.32614	7.59434	3.54417
Dutch	7.54655	5.38756	3.61759	3.47092	6.35395	10.0359	6.39382	9.99688	5.99836	1.8808	5.38563	5.71808	7.13987	12.0198	5.57222	5.89365	10.3383	4.36577	9.88876	6.12245	5.06987	9.50992	9.69662	7.96324	11.0295	8.69628	7.61888	8.97867	2.29159	10.1984	5.98626	2.45497	9.2016	8.12331	8.57305	0.74626	5.6232	6.15741	1.56218	1.80824	1.2983	8.81682	3.68581	8.79645	3.18315	2.86415	4.72457	7.48796	3.51247
Dutch	9.27586	6.0148	2.95088	3.25586	6.44227	8.57034	5.77711	10.0406	5.88212	2.08906	3.77995	5.45011	7.35212	11.0102	5.20968	5.15575	10.5097	2.02692	9.91791	5.58913	6.19522	8.17652	8.95369	7.5124	8.6381	8.74643	6.4696	9.28999	1.91639	8.29631	3.16797	2.04527	9.34764	8.17484	6.11738	1.08239	6.14133	4.75076	1.32853	0.93764	1.11994	8.26581	3.55332	8.02233	2.1501	2.94523	4.53365	8.00208	3.85896
Dutch	3.89745	5.2734	4.24106	3.29473	5.02034	8.44951	5.42513	9.68646	4.86177	1.76964	3.82998	4.41827	7.05	11.1538	4.99901	5.23965	8.57514	1.87499	9.74662	4.67844	6.1017	9.42769	8.4894	7.23201	11.0014	8.28346	5.76835	9.0055	1.46302	6.87873	3.66216	1.90651	9.11583	7.60966	5.82693	0.67876	5.23981	5.50797	0.49884	0.95712	0.71719	9.12439	2.91942	7.02987	2.02659	3.19224	3.85015	6.84953	3.6257
Dutch	5.67453	4.92485	3.5142	3.27672	5.61153	8.56155	5.78489	9.97725	5.4096	1.73502	4.06532	4.64698	7.43264	11.1672	5.10343	4.99209	9.98334	1.97775	10.0576	4.6218	5.25963	8.56328	8.56093	6.96748	9.30012	7.53544	6.47958	8.6998	1.42829	7.94053	5.70665	2.09092	8.39391	7.34333	6.54875	1.21457	5.78809	4.71963	0.90421	1.61772	1.50434	8.38824	3.00525	7.92851	2.52597	2.54852	3.94651	6.71591	3.2209
Dutch	7.62472	4.91114	3.54418	2.83795	6.7138	8.7253	6.75148	10.2429	6.64808	2.07315	3.80556	5.05401	7.39884	11.2146	5.45978	5.70325	10.9316	2.20049	9.73102	5.10012	5.6123	7.89767	8.87417	8.45035	9.91904	7.46646	7.09264	8.94189	1.56913	7.70004	5.7889	2.38225	9.26052	7.75523	6.64465	0.79131	5.93136	6.27874	1.29716	2.04653	1.29985	7.49138	3.37486	8.96844	2.34452	1.9906	4.20362	7.15324	3.68864
Dutch	9.02349	5.35742	4.16043	3.94051	6.66676	8.79322	6.32944	10.8436	4.91489	2.95492	4.62176	5.89695	6.97939	11.8516	5.14278	4.97006	9.70274	2.28641	10.6127	4.89869	5.30962	8.76508	8.60353	8.22475	12.5552	8.9871	6.02392	9.22799	2.26696	8.06366	3.86665	2.63762	9.50644	8.56854	4.95875	1.05076	5.84375	5.70673	1.29897	2.18245	1.75694	7.97814	3.41052	7.80044	2.8361	3.86164	5.72799	8.52409	3.28887
Dutch	3.29961	4.9671	3.62474	3.31216	5.52165	8.43903	5.88391	9.13128	6.82526	1.54421	4.74515	5.21964	6.81325	10.8602	4.76352	5.29017	6.78278	4.23488	9.85234	5.11272	5.98645	9.40874	9.69089	7.92351	11.1116	7.94862	6.80962	9.03954	2.07546	7.86513	4.17498	1.85542	9.63973	8.29884	6.86226	0.53715	6.23519	4.77768	1.12707	0.66243	0.87495	7.94751	2.64897	8.2435	3.51052	3.23393	4.68533	7.27814	3.56164
Dutch	6.48562	5.06147	3.40407	4.13608	6.966	9.14775	6.24699	10.3122	6.98457	2.32611	4.31031	5.20654	7.01812	11.9803	5.14767	5.35576	9.6837	3.30321	10.0517	5.20238	6.23625	9.41642	10.0291	8.29478	11.1133	8.91007	7.55017	9.2071	1.96572	7.01138	6.67391	2.77342	9.36008	8.38839	6.99332	0.63073	6.39082	5.53692	1.18929	2.05923	0.64923	8.17972	3.14724	8.45432	3.24619	3.942	4.73765	7.79885	3.81417
Dutch	7.96972	5.00994	2.98245	3.46368	7.54493	8.9901	8.39542	10.4541	6.10623	2.43494	5.19254	6.42196	6.89144	11.9126	4.91978	5.43112	11.2677	3.20004	10.0751	6.25978	5.9953	9.12478	9.20091	7.88306	11.2942	8.62691	7.21291	9.11094	3.16501	7.13699	8.05168	3.07154	9.94021	8.6299	6.01074	0.82508	5.78542	5.81576	1.37598	2.45002	2.4201	8.42342	3.61028	8.13858	4.36863	2.94768	4.83571	7.9257	3.70512
Dutch	4.42955	5.53336	1.9455	2.42667	5.80637	8.98223	5.98217	10.2741	6.37033	1.81674	3.88281	4.99137	7.49687	11.2714	5.17625	6.27119	10.5479	3.08548	10.1835	5.08077	6.40505	7.08895	9.1549	6.11179	9.51008	7.54624	6.61717	9.21159	1.52355	7.66328	5.28558	2.43443	9.38566	7.62709	6.84967	0.90649	5.89945	6.08468	1.35466	2.0778	0.89308	8.74065	3.9269	8.04287	2.41727	2.34944	4.02406	6.98985	4.02077
Dutch	8.12624	5.93559	3.88189	3.68086	7.22919	9.23635	6.67352	10.1237	7.1019	2.0775	4.48708	5.63002	7.36353	11.7592	5.30945	5.83797	10.6812	3.46981	9.66453	5.08302	5.36408	9.5379	10.5875	8.69391	11.3771	9.24653	7.67901	9.01723	2.15913	8.54537	5.06604	2.22039	9.49718	8.48829	5.84826	0.90526	5.94756	4.84214	1.35658	1.47367	1.55693	8.00204	3.85549	8.25232	3.23835	4.92795	4.67803	7.8049	3.74643
Dutch	9.77951	5.30697	4.74368	4.69634	7.34856	8.53613	7.72983	10.0538	5.36481	2.28326	3.8968	5.06421	7.2016	11.7702	5.15311	4.31372	9.75223	2.92013	9.89535	5.47931	5.69082	10.2375	8.55624	7.32568	11.8084	8.86732	6.80832	8.85681	1.47903	9.80751	5.69433	2.21526	9.07834	8.28044	5.508	0.81052	6.07965	4.72055	1.3413	1.54941	1.07446	8.16601	3.13498	8.22298	3.59187	5.93311	4.51272	7.74376	3.12381
Dutch	8.57453	5.22532	4.31673	3.88849	6.34118	9.61175	10.2837	10.4105	5.52209	1.8377	4.02922	5.13607	6.99962	11.6156	5.22231	5.60504	10.5702	2.64534	9.99826	4.69699	5.2496	9.17229	10.4861	7.62116	11.5819	8.99951	6.60371	9.14928	1.94654	9.08398	6.00813	2.5497	8.93896	9.02518	5.66731	1.64249	5.98355	6.21505	1.10563	1.61704	1.40406	8.87313	3.86853	8.27333	4.69085	2.83715	4.24602	7.5425	3.80959
Dutch	4.36265	4.63073	1.91478	2.38303	5.2922	8.13481	5.49166	9.82875	4.23003	1.38493	3.99134	5.21384	7.03151	10.8431	5.17203	4.97507	9.77744	2.02449	9.88758	5.34097	5.63914	8.76493	8.89902	7.33384	10.3332	8.45951	5.86787	8.64748	0.61272	7.62849	4.80531	1.92027	9.11326	7.3739	5.92851	1.06417	5.92432	5.56333	1.0305	1.40388	1.39144	7.54213	7.00538	7.45376	2.24568	2.71109	3.92099	6.50751	3.37897
Dutch	7.46593	4.73571	4.09379	3.50376	5.68713	9.02314	6.08348	9.9555	5.16654	2.02752	4.15002	5.21847	7.21988	11.5304	5.07472	4.39233	10.0332	2.16715	9.97579	5.43464	5.23454	8.23734	8.85193	7.17637	10.7062	7.51426	6.0999	8.73927	1.62349	7.88242	4.73701	2.65406	8.6217	7.61143	6.82561	1.41874	5.67794	5.9718	1.03274	1.96856	1.14602	7.79423	3.00815	7.49204	2.75846	2.95229	3.7082	7.31034	3.27226
Dutch	5.79397	5.19287	4.35424	3.28197	6.57084	8.56529	7.56388	9.65334	6.84248	1.98488	4.47925	6.51884	7.15091	11.4974	4.86197	5.14874	8.06628	2.7338	9.74358	4.91279	5.97352	10.134	10.0686	8.10883	11.8266	7.9703	7.53568	9.08478	1.91222	9.51483	6.30874	2.85686	9.62001	8.40618	5.0934	0.58474	5.99136	5.45784	0.92248	1.49348	1.12661	7.921	3.59591	7.73523	3.73147	3.21615	4.15696	7.38724	3.71182
Dutch	7.42891	4.76234	4.02716	3.39589	5.78726	8.7174	6.47894	10.0257	5.19978	1.82654	4.77309	5.62726	7.10409	11.7355	5.10097	4.55221	8.77912	2.03465	9.82387	5.03812	5.47472	9.65581	8.99261	8.60762	11.3889	8.62093	6.95939	8.80691	2.26798	7.60168	3.20376	1.73466	8.91583	7.67941	6.2183	0.98341	5.70965	5.66667	1.03424	1.66542	1.49686	7.79864	2.93909	7.77005	1.91359	3.25031	4.92658	7.75208	3.17507
Dutch	7.33811	5.29013	3.4058	3.27827	6.96799	9.26332	5.793	10.1631	5.19576	2.11188	3.89256	5.30437	7.42396	11.425	5.15096	5.17689	10.5219	3.0625	9.7981	5.52367	5.60567	6.84539	9.54149	8.36624	8.13668	7.81477	7.02111	9.39526	2.00843	7.3461	4.51774	2.35662	9.49175	8.08945	7.0006	0.81621	5.9887	6.49729	1.44688	1.01015	0.92417	7.99835	5.51373	7.64331	2.50269	2.33976	3.42836	7.55178	3.92471
Dutch	7.15987	5.60275	3.28146	3.41664	6.20428	9.21795	7.07437	9.92831	5.58777	1.8997	4.7825	6.31532	7.12711	11.1406	5.23507	5.13236	9.82626	2.18378	9.70124	5.44626	6.02172	7.33655	8.57561	6.6968	7.89941	6.89796	6.5176	9.12729	2.57361	8.40246	5.41472	2.2268	8.80006	8.34908	7.62656	0.76363	6.17536	5.52373	1.22613	2.62867	1.03177	8.22547	3.90873	7.71169	3.41542	2.53299	4.325	7.22938	3.74644
Dutch	5.68442	5.2108	1.94532	2.58072	6.95604	7.87787	4.87043	9.79944	5.63117	1.70332	3.96948	5.88116	6.89572	11.0828	4.85142	4.94007	8.68264	2.19216	9.66903	5.60345	6.05278	6.6527	8.61621	6.60103	7.62582	7.12344	6.0913	9.18208	1.54301	8.50181	5.36262	2.47282	9.13142	7.66069	5.95537	1.04042	5.63564	5.153	1.20552	1.66741	1.35727	8.64239	3.81638	7.66228	2.46691	1.9605	3.69148	6.90481	3.31126
Dutch	7.80867	5.54246	3.65892	3.15968	5.93327	9.65707	8.4418	10.4469	6.07578	1.91671	4.56772	5.43901	7.3224	11.4649	5.31558	5.8873	10.3198	1.7548	9.77637	5.3787	5.94338	7.6598	8.74051	5.63143	10.8344	8.49482	6.7815	8.86791	2.18903	7.69468	4.16934	2.26836	8.65997	7.97161	5.50612	0.76982	5.75739	5.70216	1.87915	1.69315	1.9952	7.89191	3.25998	7.92218	2.61794	3.06394	4.31178	7.66366	3.69657
Dutch	3.8299	5.04185	3.50894	3.07334	6.66255	8.35327	5.69183	9.59819	6.74875	1.48778	4.21899	4.4822	6.62585	11.4102	4.68277	5.3638	7.88998	3.63645	9.67471	5.98695	6.14815	7.74762	9.43057	6.66385	9.87322	7.97565	7.1574	8.92987	1.14274	9.68134	3.76796	2.1217	9.79559	8.16752	7.58055	1.2104	5.91343	5.92789	1.24169	1.22468	0.688	7.9105	3.22155	8.06649	3.08624	4.96462	4.56015	6.84456	3.88293
Dutch	6.62943	4.90002	3.65778	2.96741	6.33369	9.92087	6.524	9.29518	5.72425	1.74591	3.60013	4.9341	7.09572	11.2492	5.07174	4.76344	9.84428	3.36216	9.42897	5.08296	5.57436	9.35896	8.9773	7.38557	10.7414	7.80094	6.43484	8.46867	2.36379	8.44867	4.26223	1.97105	9.07998	7.91455	6.09847	0.86588	5.48857	6.23683	1.11082	1.5441	1.03425	8.2743	3.4401	7.27609	2.72371	2.9194	4.17452	7.22123	3.59138
Dutch	7.56185	5.00455	2.81705	2.44155	6.06857	9.93229	5.91424	10.5555	6.46202	1.92638	3.8145	4.79645	6.87317	11.0961	5.03474	4.25257	11.2874	1.96594	10.0924	4.4277	5.56446	9.45854	8.66856	7.97032	10.7157	8.32639	8.53012	9.09389	1.10819	6.15952	3.38705	2.5754	8.87535	8.00443	5.99029	1.09983	5.8599	5.22325	1.22526	1.65039	0.72624	8.18138	3.62819	7.57522	1.98573	4.68606	4.05307	7.81234	3.94238
Dutch	5.96664	5.18833	2.52135	2.6657	5.74027	8.80035	6.04068	10.2025	5.95809	3.3675	3.92556	5.15466	6.53855	10.8903	5.00525	4.72685	9.98432	1.53773	10.1119	5.4006	5.79978	8.22512	8.98544	7.53137	10.9112	8.03914	5.80577	9.08615	1.0783	6.59618	3.93254	2.31367	8.97256	7.88582	6.48692	0.70832	5.78906	4.92346	0.86537	1.70391	0.94568	8.60941	3.55077	7.52188	2.13528	2.51224	4.49249	7.05765	3.51346
Dutch	7.87628	4.94985	2.65665	2.68199	5.37668	8.50043	6.59959	9.92154	5.79313	1.85217	4.17153	5.76907	6.92801	10.7758	4.74468	4.57423	10.3884	1.55787	9.89495	4.59006	5.41525	7.31048	7.56662	6.20244	9.11514	7.14517	5.83335	8.86106	1.28032	7.56715	5.16952	2.11433	8.41507	7.14653	5.26095	0.52166	5.87196	4.79328	0.95432	1.86684	0.96708	8.10658	3.91289	8.06053	2.3523	2.05259	4.27212	6.92516	3.78436
Dutch	5.83308	5.32204	2.27724	2.68303	6.3915	8.10892	6.25727	9.77508	5.73113	1.39567	3.68973	4.78029	7.03997	10.7299	5.72507	5.72639	10.4973	2.07205	9.76453	5.01289	6.16045	5.70749	8.55948	6.806	6.35713	7.33661	6.06754	9.10127	1.75358	9.45912	4.63598	2.70826	9.04216	7.89336	6.07197	0.77921	6.11472	4.90378	1.41196	2.09456	1.07502	7.7155	3.57108	7.1889	2.17082	2.1474	3.80479	6.85158	3.69201
Dutch	5.36517	5.65206	1.36406	3.07045	6.65916	7.64121	5.84753	8.83815	6.74994	1.48916	3.96029	5.54155	6.46659	11.0931	4.63982	4.53224	8.13294	3.0044	9.75856	5.87949	5.93298	7.08088	8.86763	7.23607	7.09656	7.22498	6.9875	8.79868	1.22304	8.4393	5.98488	1.92756	9.71852	8.1068	6.22542	0.86263	5.92782	5.02961	1.28898	1.74622	0.99265	8.1049	3.07099	8.55498	2.39812	1.77375	3.53375	6.79111	3.64749
Dutch	6.91786	5.53797	2.36786	2.9453	6.21474	8.90437	6.38988	9.70557	5.88414	1.26697	3.6458	4.80221	7.24822	11.1501	5.1689	5.26099	10.4467	2.17182	9.671	4.67054	5.41434	9.02707	7.65946	6.40932	10.0123	7.7681	6.00504	8.95949	3.45755	7.93617	4.00253	2.44395	9.06337	7.68198	6.33191	0.55434	5.50218	5.6566	2.35937	1.42152	1.04331	7.89148	3.23844	7.67268	2.11014	2.80393	4.22544	7.23753	3.49772
Dutch	2.75173	4.96827	2.78711	2.62847	5.06537	7.75866	5.88119	9.27643	6.00719	1.34876	3.27254	4.66119	6.90469	11.1948	5.06675	5.16066	8.65078	1.8944	9.55468	4.82195	5.99348	8.21776	8.62404	6.67507	9.08368	8.13255	6.04843	9.0831	1.39593	8.54279	3.3512	2.52837	8.61012	7.89252	6.11069	1.05906	6.04663	5.22322	0.93892	1.27417	1.23166	8.30257	2.57163	7.23927	2.313	2.40182	3.59676	6.59216	3.49395
Dutch	8.26507	5.07263	3.67375	3.20618	6.34979	8.66271	7.6681	9.80839	5.52323	1.74496	3.74707	5.40371	6.77028	11.396	5.0148	4.44367	10.8024	1.54684	9.50032	4.62329	5.1661	9.13439	7.97335	7.22987	10.0516	8.5468	5.54734	9.10862	2.49369	9.1815	5.3542	2.49545	8.4703	8.01077	5.42294	1.02084	5.53927	5.19042	0.93332	1.63995	1.18992	7.72983	3.46788	6.90399	2.02785	3.04315	3.94679	7.21063	3.50852
Dutch	5.76427	5.20498	2.26338	2.82382	5.58063	8.8117	7.75179	10.4473	5.17596	1.49859	4.44564	5.57516	7.21559	11.2402	5.69297	5.40402	11.5156	2.16946	10.2872	5.12981	6.074	7.49386	9.88162	7.37754	8.64851	7.56554	6.87951	8.74961	1.22722	7.79852	5.82822	2.14067	9.10844	7.91566	6.45606	0.68457	6.31446	6.32139	1.18439	1.9742	1.76035	8.49647	4.14855	6.89232	2.70787	2.33962	4.05064	6.88235	3.48925
Dutch	3.23328	5.56483	3.73547	2.88035	5.65216	8.95667	6.52805	9.71527	5.71438	1.5379	4.14951	5.34761	7.45294	11.0399	5.5102	5.60597	7.86856	2.10822	9.99686	4.38581	6.51114	8.17355	8.84065	7.51757	10.6094	8.1115	6.65414	9.20552	1.31191	7.73933	4.25861	2.56948	9.38701	7.97169	7.53058	0.74721	6.18227	5.88401	1.49926	1.84217	0.88599	8.1595	2.95813	7.60045	2.13346	2.36672	4.12167	7.01617	3.96614
Dutch	8.70833	5.57539	4.01872	3.3326	6.24563	8.85715	5.77028	9.89804	5.48617	1.94344	3.99138	5.44817	7.5793	11.5865	5.94744	5.69932	11.0443	1.95011	9.66893	4.93058	5.51688	8.1999	8.45882	7.61132	9.91367	9.08964	6.14621	9.1643	3.11846	8.1865	2.04376	2.19271	8.69342	7.93624	5.96111	1.57526	5.80797	5.34704	1.52541	2.12711	0.84523	7.92579	3.6451	7.88327	2.6948	3.35811	4.04507	7.59062	3.68234
Dutch	8.59469	7.42576	4.53719	4.03603	7.40983	9.71024	8.34599	10.1674	6.49768	2.35132	4.70533	5.9628	7.49826	12.0418	5.46284	5.41016	9.90553	2.88628	10.1053	5.55611	5.76938	9.93183	9.18685	7.29211	10.9809	9.16614	6.86427	9.32257	2.0744	7.77438	7.02346	2.97206	9.73192	8.7419	6.43735	0.8567	6.25077	5.62788	1.74097	1.55092	1.29846	8.60188	3.8812	9.30475	3.34574	3.47228	4.97746	8.24892	4.16681
Dutch	4.37624	5.72277	4.1587	3.34776	6.10594	8.63653	6.13212	10.1794	5.19165	1.25357	4.20963	5.92259	7.09729	11.3831	5.17391	5.02423	8.71763	2.57365	9.80641	4.54055	6.1901	9.39759	9.25117	7.56826	11.9626	9.00153	6.10095	9.46487	2.40895	6.79019	3.68774	2.19566	8.8684	8.31705	5.19172	0.41711	6.14899	6.10207	1.09465	1.47688	1.04592	8.05701	3.02265	8.40103	2.37304	3.12256	4.48812	6.98252	4.08788
Dutch	5.28999	5.74664	3.1008	3.41087	6.53508	9.34708	6.00323	10.2043	7.06203	1.80792	4.83046	6.19622	7.53902	11.9117	5.78173	6.3713	7.88048	3.57731	10.0423	6.16386	6.35409	8.25547	11.1081	8.32914	7.745	8.3206	8.72487	9.36183	1.77348	8.7531	5.84617	2.78106	10.0258	8.4672	7.0353	0.93619	6.03342	6.90062	1.20333	1.73783	1.12039	8.03337	4.10032	8.35947	3.22957	2.37197	4.13587	7.3537	3.92007
Dutch	5.52966	5.62928	2.39075	3.25899	6.31218	8.78081	7.49467	9.76033	5.90621	1.19369	4.21167	5.63363	7.48435	11.2014	5.79742	5.88016	9.04949	2.742	9.89517	4.69687	6.01472	6.8856	8.7956	6.8208	8.61635	7.58855	6.0107	9.09609	2.85241	8.94745	5.17327	2.51298	8.83222	8.51234	5.47009	1.32968	6.43374	4.9957	1.14058	1.93261	1.21927	8.11663	3.32602	8.23977	2.58263	2.13762	4.05303	7.45412	3.6994
Dutch	8.70336	5.77733	2.45636	3.49092	7.67587	11.2628	6.41548	10.4115	6.7833	2.40029	5.5361	6.08518	7.2248	11.5417	5.67464	5.91376	10.7713	4.43352	10.0434	4.94053	5.6616	7.22832	10.3195	8.29092	6.70331	7.57502	8.11081	9.20804	1.91276	8.24882	5.68253	3.24166	9.53267	9.25703	9.22261	1.0897	6.23588	6.93529	1.50685	2.30925	1.50081	8.48321	3.83893	9.27615	4.15941	2.5722	4.22894	7.6634	4.03703
Dutch	3.34489	4.76795	1.03275	2.29108	4.31551	7.35678	5.9789	9.44424	4.88365	1.12104	3.25961	4.31647	6.34113	10.178	4.5739	4.07041	6.74373	1.38768	9.6722	4.48347	5.45149	8.57886	8.1285	7.39174	9.82304	7.73278	5.92034	8.97895	1.09036	8.1117	3.76358	1.9256	9.08153	7.23056	6.97094	4.95473	5.77956	5.00223	0.8219	0.92697	0.7394	7.82863	2.30825	6.84778	2.52773	2.26034	3.28802	6.10395	3.20559
Dutch	6.78623	5.68989	2.31493	2.80054	6.78776	8.15076	6.37334	9.51797	6.19094	1.76794	4.09756	6.58805	7.22164	11.2129	5.07173	5.34633	10.6517	2.13325	9.80983	5.12135	5.47945	8.36712	8.96904	7.0475	10.4014	8.49603	6.09028	9.46372	1.34202	7.82916	3.09642	2.32304	9.70246	8.29072	6.03372	0.44199	5.8068	5.87315	1.20629	2.13815	1.34632	7.88253	3.94517	7.46458	3.1168	2.36589	4.41455	7.36721	4.28847
Dutch	3.8652	4.83812	5.1124	3.29379	5.74206	8.45533	6.24492	10.0343	5.4132	1.30406	3.24318	4.95589	6.46144	10.9191	4.63987	4.80372	8.881	1.53226	9.51211	4.51039	5.80224	8.9596	8.33778	6.82021	9.51408	8.54228	5.44283	9.16455	1.25934	7.57086	3.89908	1.86678	8.14678	8.05618	5.08533	1.31394	5.71865	4.49835	0.81579	1.20318	0.80583	8.191	2.7185	7.27166	1.90438	3.15414	3.78495	7.20336	3.89467
Dutch	2.73796	5.25432	3.00594	2.24848	4.8577	8.07537	7.50489	9.50702	5.53671	1.76995	3.59471	4.18017	6.77506	11.0424	5.2197	4.94444	7.92475	2.0549	10.1416	4.46401	6.27257	8.4013	8.63067	7.72829	9.86359	7.88586	6.49862	8.6964	1.2183	6.08401	3.46161	2.35449	8.74501	7.36898	6.31951	0.66387	5.81785	5.6114	0.87382	2.14249	1.30009	7.91668	2.38003	7.38441	2.83285	2.48452	4.64083	6.32836	3.42106
Dutch	6.46554	5.14565	2.13897	3.10665	6.70029	9.06499	7.34095	9.13919	5.973	1.8185	3.95565	5.70794	7.3065	10.9213	5.08105	5.36315	10.1032	2.16276	9.72297	4.45426	5.7481	8.68381	8.93762	7.32792	10.4249	8.56899	5.97791	9.04299	1.79463	9.67067	10.2807	2.44124	8.76983	8.29135	6.25179	0.80112	5.65845	5.12924	1.02244	1.54159	1.44198	7.90061	3.4755	7.45171	3.53152	2.68672	4.57367	7.24827	3.89307
Dutch	8.24938	5.72174	2.67944	3.23428	6.20311	8.8933	6.21031	10.3429	5.38642	1.93374	4.76045	5.87144	7.15738	11.1824	5.4981	5.05376	10.7954	2.46247	9.93699	4.86815	5.94785	7.93063	9.54523	7.62968	9.1621	8.49091	8.90248	8.78823	2.55923	8.67559	3.59566	2.47391	8.49297	7.92104	9.26849	0.81904	5.90017	6.71355	1.56922	2.32387	1.58634	7.98277	3.58938	8.47026	3.07901	3.35855	4.42243	7.31494	3.56379
Dutch	7.44238	5.09796	3.23501	3.27067	6.48896	8.82682	6.58101	9.87614	5.7866	1.67679	4.13184	5.64478	6.90281	11.2269	5.4092	5.21305	9.90333	1.64414	9.74474	4.98137	5.70374	7.20157	9.16599	6.95548	8.58002	7.92092	6.70991	8.95987	3.01316	8.03492	7.39779	2.61141	8.53722	7.79248	5.97356	1.89402	5.76687	4.89316	1.28987	1.12494	1.2777	7.97975	3.80175	7.84486	3.5445	2.1475	4.05841	7.08461	3.60449
Dutch	7.74074	4.90778	2.37133	2.5125	5.64207	8.81735	5.48952	10.9314	5.82275	2.54123	5.09305	6.42259	6.79642	10.9469	4.86873	4.85567	10.302	2.45291	9.95615	5.28859	5.27972	10.5097	8.78546	8.69097	11.7725	9.6092	6.80474	8.38363	1.35769	5.99881	5.81634	1.97004	8.94855	7.88385	7.25598	4.01623	6.18827	4.62986	1.1696	1.80271	1.51683	8.75022	3.21627	8.31274	2.52917	4.97089	4.91409	8.07037	3.58074
Dutch	7.75648	5.11577	3.50899	3.20188	5.96332	9.19773	6.35289	10.5537	5.39199	1.90871	3.73639	5.45388	6.62034	11.2222	5.1608	4.93419	10.6085	1.78532	9.87334	5.38439	5.59189	8.61723	8.44	6.91122	10.2768	8.0984	5.33051	8.92279	1.50847	8.09598	4.46059	2.34657	9.66074	7.61401	6.75812	1.14223	5.71919	6.54972	0.75723	1.81047	1.19131	8.24588	3.40822	6.94485	2.63505	3.02445	3.86971	7.49965	3.37126
Dutch	6.2276	4.95993	3.78728	3.34942	5.54631	8.9215	5.8534	10.4155	6.81077	1.7103	4.03185	4.87868	6.87723	11.2223	5.2456	5.12837	10.103	1.88506	10.2055	4.81727	5.59474	9.01176	8.68245	6.6926	10.119	8.53354	8.17305	8.91143	1.97647	9.323	5.19731	2.33285	9.2738	7.69484	6.78089	0.64973	6.17877	5.17158	0.85922	1.27374	1.1851	8.005	2.81647	7.35549	2.43447	3.42352	4.43343	8.13846	3.42093
Dutch	8.52772	4.88664	3.86126	3.94399	6.10469	8.85229	5.77856	10.061	5.41152	1.98554	4.04951	5.1182	7.09275	11.0421	4.5487	4.62956	9.32527	1.6991	9.59844	4.96101	5.61724	9.37023	8.92847	7.61003	11.7079	9.04579	6.56152	8.99446	2.02465	7.31809	4.74596	2.26511	8.22593	8.18397	5.48704	1.44496	5.73618	4.76125	0.86002	1.98911	1.56956	7.51603	2.93466	7.46223	2.30984	3.5195	4.22593	7.60242	3.50803
Dutch	9.6616	5.83277	3.42866	3.54479	7.22566	8.86417	7.25857	9.38959	6.22832	1.96309	4.32827	5.90906	6.94708	11.1696	4.81061	4.83711	10.671	2.2153	9.86508	4.4236	5.53743	8.90996	9.2571	8.15692	8.99145	8.17137	6.59201	9.53627	2.25321	8.68611	7.36396	2.35818	8.99931	8.48241	6.94096	0.75951	5.81376	5.93125	1.41643	2.0676	1.40461	7.98579	3.05812	8.4898	3.30051	2.78392	4.59568	7.34482	3.76264
Dutch	8.50301	5.46479	2.97314	3.45503	6.39862	9.0776	6.27363	10.5055	5.23862	1.7494	3.79931	5.14852	7.09633	11.5167	5.48267	5.75035	10.8208	1.97707	9.63116	4.34622	5.3313	8.69134	8.03417	6.87438	9.94173	8.15387	5.76083	9.0289	2.12516	7.46355	5.55196	2.64877	8.17574	8.13352	5.38643	0.85708	5.7436	6.03349	1.19962	1.94605	2.91977	7.46966	3.78059	8.29639	3.15146	2.99464	4.43635	7.55662	3.74999
Dutch	5.5613	5.34805	1.71296	2.72777	5.75689	9.2328	6.91852	9.84406	5.86941	1.9922	4.12711	4.95378	6.9642	10.812	5.36458	5.28142	10.3548	2.21819	9.68439	4.64736	5.99647	8.58299	9.26757	6.98854	8.93735	8.28309	6.37709	9.12002	2.4614	7.82392	3.95463	2.2383	9.15587	7.83847	6.0677	1.05807	6.21088	4.97538	0.95952	1.5961	1.35023	7.72179	3.63268	7.31061	3.55572	2.59008	3.95996	7.1709	3.58048
Dutch	8.04204	5.02427	3.9226	2.98468	5.96114	9.26171	6.94135	9.3603	6.08761	1.55385	4.09252	5.69274	7.11751	11.3827	5.10489	5.32335	10.4074	2.18898	9.63134	4.80058	5.54802	8.25398	8.81472	6.9133	9.30132	8.12581	6.6021	9.0819	1.34247	9.04688	4.5826	2.19223	8.965	7.78823	6.43266	0.92688	5.66055	5.86998	1.2321	1.75725	1.40657	7.62809	3.36811	6.76374	3.29084	2.54057	4.47646	7.3402	3.67161
Dutch	8.62171	5.6216	3.18827	3.45032	5.95129	8.96635	5.68437	10.6503	5.56952	1.68018	4.39183	5.45703	7.65398	11.4742	5.57753	5.42086	10.1391	2.44492	9.74887	5.37337	5.71582	8.35722	8.67304	7.441	9.12645	8.48708	6.51645	8.77702	1.87946	8.59846	6.85456	2.42129	8.58285	8.34896	6.62723	0.69299	6.0532	5.63759	0.94029	1.8671	1.15198	7.79945	3.32592	7.60196	2.43329	2.82553	4.29951	7.40181	3.7251
Dutch	4.35227	5.23911	2.64068	3.02528	5.84054	8.01639	5.41766	9.89518	5.57442	1.35025	4.19465	4.97003	7.15658	11.62	5.54829	5.42097	7.52916	2.45688	9.71895	5.04166	6.16883	8.0565	9.1722	6.7532	8.80363	6.57515	7.47034	9.12899	2.178	9.22609	5.55924	2.23484	9.08416	7.87118	8.41236	1.00743	6.36899	5.15788	1.1883	1.55425	0.74041	7.96768	3.32091	7.87639	2.53745	2.38685	4.12222	6.96188	3.55503
Dutch	4.37359	5.31344	2.81589	3.36846	6.29866	8.66238	6.12701	10.3013	5.93148	1.19587	4.42786	6.08071	7.40514	11.2226	5.67418	5.6363	9.10501	2.38866	9.94519	5.40252	6.62949	8.83911	8.9691	7.75175	10.3642	8.61416	7.01238	9.1937	1.57201	8.34561	5.00462	2.90203	9.56589	7.93957	6.10757	1.68179	6.43903	6.20747	1.33831	1.90462	1.12431	7.90823	3.48851	8.38808	2.13429	2.69767	4.30657	7.1247	4.03672
Dutch	6.98869	5.01431	2.52921	2.6582	6.2994	8.39445	5.60539	10.6761	5.01866	1.80744	3.58542	4.92562	6.79833	10.9351	4.56826	4.74397	9.96649	2.08681	9.5321	4.72015	5.34715	8.13068	8.39743	7.16286	9.23757	8.33558	5.64045	9.23131	1.49331	8.96369	5.78112	2.1735	8.99238	7.81051	6.12826	0.90035	5.71327	5.42883	0.9529	1.36093	1.17579	7.87949	3.34775	7.95562	2.99401	2.48029	4.08215	7.02429	3.78907
Dutch	5.92579	5.15038	2.58374	3.20413	6.72076	8.32832	5.3893	9.91645	6.48529	1.58666	3.93479	5.33496	6.99523	11.167	4.8089	4.54641	8.5649	1.85915	9.81631	5.26616	5.86917	7.36513	8.63493	7.33505	7.69844	7.94607	7.28762	8.80338	1.6316	8.34081	4.42251	2.15686	8.59647	7.90312	6.27882	1.08568	6.06505	4.47819	1.18445	2.35273	0.88489	8.20532	3.06498	8.46489	2.54919	2.03916	3.8475	6.81381	3.52972
Dutch	3.16049	4.9535	1.41445	2.02127	5.53723	7.58444	5.33576	8.46342	5.75982	1.09784	3.19523	4.84497	6.82994	10.7286	4.83481	5.04605	9.24604	1.77357	9.13797	4.13704	5.39669	7.55991	9.78206	6.35166	9.16903	8.05664	5.82397	8.37384	1.18015	6.63071	8.31509	1.86649	8.16831	7.38563	5.30786	1.16764	5.6049	4.9424	0.76381	1.18769	1.26016	7.68628	2.12503	6.80692	2.46998	2.37179	3.94991	5.88311	3.23075
Dutch	7.92523	5.0418	4.04877	3.40534	5.55734	9.48785	5.74094	10.1204	5.79738	1.89477	3.66645	5.05071	6.76113	10.9421	4.98305	5.19234	9.48354	1.92522	9.92634	5.27794	5.03495	9.26974	9.6376	7.3755	9.65525	7.96207	6.94333	8.83791	1.14625	8.80613	3.68868	1.95942	9.03091	7.27004	5.94694	1.32878	6.36391	5.11223	0.97092	1.13401	1.15137	7.52606	3.31498	8.84601	2.59686	3.01625	3.88759	7.35805	3.43682
Dutch	6.8456	5.19017	2.91254	3.21769	6.29397	8.88813	6.65949	10.3376	5.78885	1.32456	4.12819	5.67553	7.07962	11.242	5.04395	5.43871	11.0649	1.64627	9.7361	4.76545	5.6872	8.47548	9.22374	7.62445	9.29661	8.35121	6.59796	8.9074	2.04189	8.59201	4.55925	2.15251	8.92785	8.15012	5.754	0.42603	5.97445	6.44878	1.27326	1.8835	1.26427	8.42328	4.26056	7.67442	3.02017	3.08711	4.29027	7.14726	3.90904
Dutch	7.59587	4.63343	2.02755	2.38865	5.37249	8.54406	5.47436	10.124	4.84851	1.75104	3.91796	5.31813	6.6076	10.8024	4.93988	4.99607	9.99827	2.0549	9.70279	4.40825	5.16804	8.34326	7.82323	6.81966	8.88993	7.69422	5.58385	8.7921	1.14999	7.65507	4.80524	1.85653	9.07654	7.52885	6.0621	1.46169	5.99438	5.5754	0.74789	1.665	0.95208	8.0122	2.76206	7.3591	1.98091	2.6535	3.76217	6.97539	3.43401
Dutch	4.26617	4.9678	3.68828	3.57889	5.33585	8.58223	7.14268	10.2481	5.39768	1.19519	4.8786	4.97315	7.04903	11.3234	5.56029	5.18474	8.09636	2.07762	9.90176	4.68338	5.92544	9.48151	9.44482	8.51643	10.0913	8.09468	6.87561	9.39644	1.29991	8.95305	3.60972	1.63879	8.86997	7.72682	6.59655	0.69575	5.6699	6.31041	0.90494	1.52908	0.7013	8.82134	2.50022	8.95756	3.119	3.14456	4.68258	7.04072	3.73528
Dutch	3.30321	4.96518	2.69396	2.94504	5.62838	8.53176	5.85811	10.2456	4.40339	1.31084	4.07935	4.81931	7.06651	10.7462	4.97436	5.05824	9.05218	1.84215	9.83733	4.57519	6.05375	8.4219	9.29603	7.99361	9.41186	8.36202	6.41698	9.11908	2.24576	8.31674	3.39301	1.82315	9.12505	8.25022	6.20746	1.09287	6.03957	5.54685	1.34393	1.67938	1.03983	8.58676	2.98209	7.47201	2.81313	3.30516	4.03331	6.68882	3.68202
Dutch	3.86788	5.40278	3.02537	2.77703	6.25747	8.03528	5.27358	9.33091	5.33914	1.26014	3.88171	5.53069	6.89172	10.9056	4.88514	5.39916	8.28837	2.0193	9.66301	5.07419	6.10763	8.4145	8.60215	7.38635	8.1356	8.33377	6.38881	9.38624	2.84255	7.99408	5.30561	2.50421	8.63916	7.76296	5.9804	3.0781	5.8503	5.22482	0.85367	1.31136	1.04943	7.53056	3.2519	7.69938	2.21415	2.10805	4.02151	6.66022	3.79374
Dutch	2.60702	5.06367	1.68562	2.69839	5.90788	8.34599	6.06124	8.86466	6.06165	1.42408	3.66721	4.76489	7.07707	11.4323	5.10211	5.00893	7.82106	1.82341	9.65175	4.81298	6.06081	8.16425	8.15922	7.34138	10.3575	7.90401	6.22105	9.11669	1.32869	7.67676	4.51035	2.34328	8.68059	7.93678	5.85426	0.46322	5.9247	5.40858	0.63855	1.27476	1.1078	7.97103	2.30754	7.73601	2.81094	2.50022	4.07914	6.57933	3.96877
Dutch	7.67225	5.13616	3.13966	2.88454	6.56701	8.75257	6.0059	9.46723	5.62498	1.83226	4.06802	5.53624	6.80469	10.8549	5.05764	5.49192	9.46456	2.41004	9.38334	4.68626	5.19097	8.26381	8.6728	6.79904	9.5706	8.00611	6.08217	9.42013	1.53474	9.18181	5.30534	2.22913	9.20711	8.32259	4.83989	0.84867	5.47347	5.19569	0.92804	1.28163	1.5118	8.06968	3.09678	7.04314	2.53884	2.41882	4.20595	7.17558	3.51177
Dutch	7.8975	5.11934	3.57484	3.44829	6.0771	8.76771	5.29424	9.39167	5.64074	1.96035	3.68358	5.20939	6.89359	11.0072	4.85355	4.38066	9.20822	1.88817	9.449	4.64528	4.90001	9.11016	7.80732	6.64981	9.39209	8.50244	5.45428	9.3342	2.45268	6.69241	3.8077	2.1443	8.72576	7.46918	4.87966	0.86841	5.6051	4.05051	1.02158	1.20188	1.46598	7.82903	2.55409	8.08105	3.09581	2.91247	4.18011	7.20483	3.4246
Dutch	5.5026	5.03028	2.12136	3.33757	5.74372	8.46791	7.26185	10.5721	5.85665	1.64957	3.78138	4.8967	6.73323	10.9349	5.44891	5.30038	9.15814	1.51662	9.87056	4.48203	6.51101	8.77889	9.22992	7.3509	9.19912	8.1957	6.85772	8.89496	2.81066	8.8164	5.97807	2.12425	8.4305	7.9174	6.43795	2.41822	5.71145	5.29582	1.16734	2.3695	1.67206	7.41255	3.09363	6.53494	5.17454	2.31951	4.80223	7.127	3.72544
Dutch	4.07773	5.58331	1.84778	3.32582	5.53767	8.67828	6.49244	10.3421	5.73792	1.5609	4.26438	5.21939	7.03895	11.3878	5.14565	5.20692	8.54424	2.39205	9.99712	4.92937	5.89909	9.02348	8.33589	6.95369	10.3539	8.08674	6.37659	9.05126	1.08972	10.2333	7.36128	2.2423	9.18094	7.93574	5.34878	1.35992	6.22494	4.87961	0.89941	1.79217	0.98587	8.23782	3.53806	8.41974	2.80913	2.63577	4.36509	7.18839	3.66673
Dutch	8.79875	5.64111	3.76015	4.29042	6.8501	11.7138	5.88241	10.0791	5.92969	2.03959	4.77894	5.98501	7.26194	11.6903	5.68182	5.7322	10.5992	2.87492	10.1318	5.20416	6.00945	10.4662	9.65486	8.85035	12.5367	9.09324	7.7694	8.89972	1.69059	8.51911	6.26435	2.45553	9.32149	8.47393	7.7717	1.11184	6.06086	5.85402	1.35832	1.37265	1.29125	8.31333	3.60961	8.34266	2.74202	4.15359	4.97425	8.24459	3.80737
Dutch	7.32121	5.17956	1.53522	2.62414	6.13116	8.41681	5.5984	10.2322	5.73362	1.86092	4.0389	5.46728	6.99427	11.0294	5.23905	5.33147	10.9494	2.13028	9.78965	4.97368	5.19044	6.87281	9.05493	7.42625	7.32219	7.69074	6.41831	9.01787	1.74455	6.93891	2.96774	2.27052	8.838	7.85516	6.59374	0.82251	5.68379	6.1843	1.38868	1.78859	1.34017	7.73228	3.34211	8.29519	2.50726	2.03902	3.49288	6.60843	3.40054
Dutch	6.71048	4.98887	1.44507	2.33371	6.74877	8.33763	5.81341	10.4897	5.97529	1.94881	4.24882	5.25757	6.54087	10.7044	4.79216	5.3533	10.1956	1.72219	9.6884	5.23943	5.74305	9.14495	8.91695	7.53601	10.7077	7.94912	6.39304	8.9925	1.07451	7.50522	2.71867	2.32027	9.16526	7.7107	5.62436	0.80544	5.32653	4.53978	1.24843	2.47259	1.21467	7.07349	3.18843	7.03054	2.16716	3.55209	4.07702	7.27885	3.98226
Dutch	8.06193	5.38438	3.53793	3.82738	6.27395	8.33434	6.20074	8.99868	5.49326	1.42371	4.1363	5.46775	6.86085	11.1332	4.65885	4.66745	9.45344	1.92295	9.68721	5.22034	5.39259	9.01434	8.40883	7.20225	10.9171	9.37807	6.13232	9.07654	1.49548	7.45933	4.72141	2.0837	8.83437	7.96255	5.64722	0.90757	5.71119	4.99943	1.05694	1.74419	0.76133	7.43655	3.19442	7.49745	2.38464	3.22492	4.25268	7.42794	3.76224
Dutch	6.07978	4.73237	3.44472	3.38831	6.3297	11.3231	6.07223	9.82215	6.22896	1.86393	3.84779	5.02692	7.13494	11.4015	4.86098	4.89055	9.9026	2.03662	9.68457	5.04295	5.49913	8.30982	9.25497	7.12215	9.3928	8.52059	6.9614	9.43361	1.77603	7.82915	4.54235	2.29137	9.03502	7.6572	6.26567	1.24409	5.66099	5.42529	0.86046	1.59218	1.22732	7.55235	3.03271	7.20116	2.12808	2.93026	4.2516	6.8494	3.87249
Dutch	5.04168	5.2781	2.8834	2.86046	5.64716	8.93928	6.06464	10.2148	6.00542	1.34761	3.98691	5.23638	7.12868	11.3048	4.83458	4.67201	9.74068	1.52012	9.79779	4.59982	6.05657	7.37778	9.63534	7.07118	9.67641	6.86887	6.59227	9.20104	4.0576	8.30445	3.9857	2.21193	8.60362	7.78626	6.67805	0.70829	5.62603	5.9324	1.04072	1.62961	1.47853	7.92922	3.00652	7.39437	3.24271	1.96437	3.42266	6.64256	3.39019
Dutch	4.15524	5.90949	2.00587	2.94796	5.97935	8.78662	6.25217	9.83078	6.44407	1.41316	3.55706	4.74236	7.00668	11.0832	5.29855	5.45	8.66074	1.97965	9.8089	4.56491	6.33643	7.206	11.2408	6.87203	7.54695	7.5333	6.35716	9.37374	1.42533	8.61628	3.21952	2.4708	8.85153	8.19185	5.85924	2.52811	6.02922	5.4873	1.22231	1.38337	1.21064	7.63679	3.87007	7.57117	2.23768	1.86229	4.2957	6.71432	3.64559
Dutch	7.12874	5.25342	3.12036	3.81715	6.75019	8.89853	5.92116	9.80553	5.60009	2.00666	4.20317	5.82073	7.49421	11.6722	5.15418	5.81437	9.69788	2.62406	9.76654	4.99377	5.59975	9.20224	8.75019	7.12518	11.2983	8.47501	6.37484	9.53666	2.14596	8.41201	5.47788	2.36148	9.5025	8.28103	6.55615	0.96062	5.94699	5.79707	0.96727	1.73029	0.96531	8.26107	3.47595	8.25403	2.66696	2.9443	4.3252	7.50644	3.46965
Dutch	7.18197	6.20293	2.29576	3.14654	6.49428	8.81126	6.40965	9.98695	6.34966	1.76698	4.18985	5.64388	7.58213	11.4176	5.56212	5.90433	11.3964	2.46961	10.1297	4.88808	6.63539	7.09533	10.5045	7.05961	7.63154	8.22962	7.49314	9.62164	2.11714	10.0721	5.84462	2.76665	9.58007	8.62275	6.02653	1.10822	6.43674	6.06597	1.46332	1.87177	1.81393	8.45186	4.19628	8.1538	2.66139	5.70004	4.33205	7.21087	4.2277
Dutch	5.25783	5.12705	3.15009	3.35203	6.09475	7.94468	6.18351	9.64779	6.15802	1.69377	3.67424	5.31701	6.9576	10.9657	5.18931	5.4535	8.68414	2.71061	9.88072	4.92763	6.68397	8.91479	8.54436	8.23179	9.31409	8.71445	5.77841	9.28839	1.91254	6.59196	2.263	2.15216	9.45835	7.83896	5.0529	1.6705	6.04765	4.87077	1.42296	0.98796	0.79998	7.39276	2.47532	7.3415	3.46115	2.52388	4.11865	7.10402	3.92311
Dutch	7.55916	5.12261	2.91131	3.56507	6.6568	8.23316	5.32906	9.8554	5.6452	1.97592	4.66245	5.85808	6.71981	11.4725	4.62757	4.48471	8.72467	3.76462	10.0214	6.60058	6.02234	7.57247	9.27714	7.44541	9.58166	7.37772	7.23275	9.2214	2.10631	8.35795	5.51077	2.44777	9.371	8.31059	6.63999	0.91499	5.99602	5.86937	1.21047	1.3051	1.48806	8.15431	3.98952	7.9102	3.59304	2.18057	4.22337	7.20971	3.74314
Dutch	5.79804	5.90606	4.71539	3.9893	6.61365	8.28077	5.85368	10.5319	6.10938	1.44865	4.07465	5.61098	7.57345	11.4069	5.14701	5.53621	9.74271	2.35659	9.88568	5.16094	6.51031	9.2952	9.32891	7.95358	10.7971	9.38672	6.77764	9.45346	2.30718	8.91134	3.32327	2.46184	9.18711	7.85887	6.86392	0.80588	6.0177	5.64855	1.55892	1.38604	1.08427	8.25931	4.21344	8.51212	2.3889	2.95802	4.45232	7.25888	3.91796
Dutch	8.92114	5.66428	4.88463	5.16623	6.82498	8.84946	6.58684	10.5761	6.18207	1.8731	4.65912	5.59682	7.3344	11.9061	5.50635	5.31876	11.1629	2.86155	10.1098	5.80336	5.87106	10.4488	9.23658	9.02853	11.9892	9.19977	7.35128	9.13917	4.65961	8.56322	5.35485	2.49668	9.50162	8.42855	6.50919	1.5274	6.35642	5.50566	1.4373	1.62903	1.27419	8.42595	3.63466	7.8647	2.79836	3.81798	4.94434	8.41582	4.24234
Dutch	8.14339	5.44133	4.37361	4.87105	6.70979	8.56614	6.26119	10.5309	6.06789	1.7114	4.40898	5.59556	7.31982	11.7845	5.39603	5.01686	10.8207	2.80421	9.8046	5.66106	5.4466	9.93368	8.92085	8.92172	11.4187	8.87106	7.36614	8.94646	4.29681	8.34355	5.12445	2.41264	9.35882	8.31873	6.48112	1.21126	6.24576	5.27489	1.35123	1.41715	0.69849	8.15002	3.3579	7.65094	2.69929	3.86438	4.81294	8.2276	4.21228
Dutch	8.78803	5.05945	3.20043	3.57028	6.49325	8.87192	6.35298	9.7675	5.4416	1.3217	4.7608	5.55659	7.48537	11.1821	5.33822	5.16385	11.6413	1.9145	9.67324	5.31707	4.91089	8.87003	7.8311	7.51157	9.47621	9.10216	5.67799	8.75365	2.63631	7.88712	4.876	2.40291	8.09813	7.87078	5.18374	2.7117	5.96694	5.61481	0.99073	2.41947	1.20788	7.62506	2.88519	7.83046	2.69854	2.54641	4.26521	7.02576	3.41619
Dutch	6.70058	5.40088	2.19753	2.97794	6.27002	7.92947	6.20306	9.28394	5.81127	2.03956	3.54071	5.17159	6.75356	11.0315	4.67941	4.31295	9.813	2.00073	9.84017	4.32788	5.72687	8.51301	8.3768	6.84569	9.73395	8.12884	5.77034	9.03175	1.61529	9.55759	4.48496	1.6082	8.89002	7.65374	5.90484	0.614	5.66748	5.09118	1.18895	1.13199	1.56274	7.21809	3.26237	7.69716	2.47107	2.26259	3.77551	7.22099	3.71126
Dutch	7.76409	5.72446	3.13852	3.4107	6.35706	9.62872	9.65104	10.0948	6.31851	1.9854	4.53515	5.59916	7.60237	11.4465	5.45969	6.89511	10.4561	2.69673	9.84616	4.43691	5.52578	9.55847	10.3301	9.18123	10.7558	8.1808	8.6258	9.37642	2.79272	6.8077	2.64424	2.5629	9.28056	8.37464	5.72247	1.80402	5.86715	5.66959	1.77285	2.06074	1.12306	8.2969	3.83865	8.26603	4.06739	3.32535	4.01624	7.66617	3.73797
Dutch	7.01749	4.78644	3.20812	3.44373	6.06954	7.73151	5.49575	10.1087	5.64637	1.82161	4.18332	5.82773	7.00553	11.04	5.16003	5.15847	9.74826	1.97664	9.51456	4.93869	5.73638	7.7687	8.08709	7.24459	10.1128	7.61405	6.47231	8.60754	2.13131	6.55433	6.14838	2.30052	8.61289	8.16699	5.98711	0.7422	5.75085	4.38165	1.0919	1.31108	1.6613	7.58377	3.04649	7.37608	2.65184	2.75445	3.84122	7.3483	3.39965
Dutch	3.7833	4.95001	2.06078	2.90733	4.96537	7.91397	5.00822	9.958	4.97139	1.26246	3.77968	4.96939	6.81783	11.0593	5.10151	5.48135	8.93751	1.95461	9.8715	4.53414	5.80107	9.57101	8.64884	6.92876	11.4864	8.80155	6.23521	8.94051	1.12589	6.71486	5.80533	2.28199	9.19054	7.74997	5.50801	0.50808	6.14278	5.58935	1.20454	1.44683	0.55006	7.74907	3.32318	6.48252	2.14667	3.83441	4.21911	7.15622	3.31479
Dutch	7.78702	5.08326	4.81002	4.07451	5.78846	9.02631	5.61107	10.3896	5.35789	1.75293	3.78837	5.62508	7.43412	11.9702	5.2616	5.26068	10.0527	1.85333	9.57959	4.79523	5.38543	9.32659	8.43629	6.97461	11.3523	9.34054	6.29706	9.03085	3.13529	6.5495	3.47702	2.2256	8.51883	8.06583	5.35264	1.08076	5.88172	4.91968	1.45868	2.73767	1.19613	8.10619	2.96682	7.73032	2.37249	3.08071	3.85356	7.56568	3.67459
Dutch	5.68464	5.35255	1.28255	2.40069	6.59767	8.5679	5.45712	9.96765	5.49265	1.56884	4.20475	5.03395	7.19907	10.9349	5.27932	6.13643	10.7737	2.3877	9.80305	5.74453	5.99171	9.04122	8.82312	7.16128	9.57195	8.34139	6.63307	9.06764	1.19032	8.67931	5.34315	2.57241	8.89188	8.39203	6.57797	0.61014	6.19325	5.19125	1.43053	1.48596	1.05669	8.02022	3.26843	7.84803	2.51339	3.08385	3.98969	7.49732	3.87399
Dutch	6.00009	4.97893	1.07783	2.45797	5.53504	8.58899	5.37999	10.7039	5.10382	2.15725	4.1507	5.58117	7.21408	11.0465	5.37496	5.17376	10.0632	2.74444	10.3205	4.61159	6.04622	7.59755	9.61597	7.03382	9.74504	7.9904	6.51735	8.83521	1.48073	7.15035	4.36391	2.4936	9.331	7.28287	6.98345	1.06299	6.53048	5.65495	1.04105	1.30571	0.91583	8.97148	2.94518	8.03697	2.60808	2.30109	4.08081	6.8351	3.53787
Dutch	7.75401	5.21246	2.96964	3.07457	6.30491	9.55313	6.55376	10.4782	6.09281	1.93783	3.88049	5.2762	6.86881	11.3208	5.09493	5.90224	10.2356	2.29915	9.67505	4.70832	5.11496	8.61472	9.1107	7.92106	10.8505	8.50808	7.92074	9.16471	1.09732	7.60722	4.99784	2.19035	9.00518	8.26879	6.575	0.54737	5.50737	5.33031	0.58611	1.57354	0.66579	7.9246	3.3042	8.53721	2.53976	3.03571	4.40886	7.51627	3.90326
Dutch	7.9447	5.35713	4.57479	4.00393	6.08883	8.61556	5.83299	10.6097	5.83968	1.77235	3.70642	4.72886	7.4956	11.8097	5.3449	5.36025	10.6843	2.13631	9.7182	4.59622	5.85097	8.42873	8.40802	7.81483	10.2615	8.39954	6.02738	8.86837	1.30439	8.0867	4.68062	2.19103	8.87531	7.74562	6.27333	0.56342	6.16826	5.38829	1.43518	1.66074	0.74186	7.73172	3.32876	8.10583	2.1598	3.46013	3.69775	7.65191	3.84434
Dutch	7.78436	5.09623	4.61346	4.09935	6.88691	8.76031	7.69148	9.90523	5.51356	2.13016	4.7796	5.87763	7.09228	11.3798	4.93454	4.99853	8.35311	3.62448	9.94996	6.35509	5.60189	9.35776	8.29808	7.21066	11.1696	8.20924	6.69478	8.91357	3.15286	6.99039	6.13822	2.77739	9.08954	9.0938	5.96807	0.78832	6.04797	3.72341	1.27326	4.00335	1.60555	7.65152	3.26625	8.50584	4.27446	3.04534	5.01857	7.65133	3.39998
Dutch	9.29964	5.63103	6.68938	4.6622	6.01447	8.92079	7.21449	10.1029	5.52748	2.21566	4.135	5.64562	8.4477	12.6564	5.29507	5.91413	10.2357	2.39047	9.53896	5.27967	5.46707	10.5346	8.79321	7.67659	11.1968	9.82007	6.4769	9.00425	1.49372	8.05652	5.55608	2.02698	8.60327	8.1051	6.06145	0.70706	5.76559	5.76425	1.04661	1.93496	1.03286	7.89344	2.97387	8.24984	2.13125	4.00706	4.38583	8.4615	3.47421
Dutch	4.10944	5.142	3.03027	3.28529	7.02661	8.76189	6.86137	9.91095	6.41564	2.26046	6.34942	5.36983	7.11779	11.5244	5.36761	4.87958	8.96085	3.01523	9.91464	5.17106	6.76165	9.26234	9.62734	7.52233	11.4072	8.22161	7.02164	9.23316	1.72481	8.0354	6.12922	2.65172	9.5993	8.74156	5.99897	1.28978	6.2234	5.69501	1.39334	2.16454	1.42078	8.35342	3.55982	9.39976	3.50488	2.97496	4.99721	7.20944	3.89603
Dutch	5.88462	5.27858	1.25022	2.60873	6.41453	9.32945	5.58016	10.5067	5.7851	1.65434	3.91116	6.02821	6.71374	10.6635	5.07662	5.7298	9.69418	2.1217	9.4891	5.03156	4.99216	7.44596	8.55397	7.22267	9.19772	7.70144	6.0563	9.29461	2.01295	10.0469	5.51472	2.19138	8.72748	7.95345	5.69259	0.71236	5.48067	5.89534	0.82218	1.77347	1.45905	7.75858	3.45863	7.66061	2.26017	2.0312	3.88911	7.25422	3.66377
Dutch	1.62841	5.02163	2.71025	2.52457	5.56609	9.34732	6.303	9.59324	7.06089	0.94858	3.37582	4.5464	7.10626	10.7645	5.21315	5.47991	8.9978	2.50814	9.6751	4.99542	6.2267	7.00156	7.88459	6.67943	8.26991	7.79371	5.8159	9.23141	1.15697	8.67725	3.77865	1.64388	8.89555	10.0679	5.59202	0.46765	6.09465	4.43019	1.03049	1.13511	0.96615	7.89707	2.78692	7.8765	2.52032	4.34048	4.08571	6.22034	3.8555
Dutch	2.15625	5.80942	1.91362	3.24183	5.92342	7.78208	5.81306	9.98462	7.41314	1.49467	3.64433	5.15684	6.85865	11.122	5.23895	5.20098	7.73611	2.27879	9.98548	4.85743	6.79077	9.24381	9.53852	8.18281	10.313	8.13389	9.70197	8.88063	2.03643	9.06939	5.28232	2.00805	8.7378	8.17033	7.6033	0.47574	6.008	4.80378	1.19177	2.03153	0.71803	7.6932	3.25291	8.38658	4.44766	2.75122	4.98807	6.89091	3.84013
Dutch	8.40831	5.16463	4.31441	3.91254	7.1446	8.6203	7.01728	9.77136	6.36182	1.73389	4.46172	5.79389	7.09273	11.4885	4.66466	5.38521	8.96283	3.81665	9.75669	5.55163	5.43354	9.61753	9.23981	8.68098	10.7826	8.70347	7.65206	8.94952	3.87492	9.58895	5.39141	2.39672	9.32342	8.17941	6.91368	0.72818	5.84116	5.96738	1.3648	2.72396	1.70103	8.15206	3.3581	7.93152	3.4406	2.94528	5.05509	7.78045	3.57263
Dutch	5.29406	5.06225	3.32381	2.82643	6.73097	7.74489	5.88525	9.55268	6.08753	1.67199	3.79216	4.76477	7.1466	11.1375	4.58119	5.78419	7.80282	3.18636	9.59738	5.42185	5.72629	6.97531	9.03843	7.2719	9.49371	7.58953	7.25418	8.98906	1.36205	10.5289	3.80245	2.07086	9.60902	7.63601	6.62558	0.45027	5.68706	5.42601	1.15457	1.29905	0.59509	7.72451	2.83594	7.91344	2.70139	1.77128	4.12539	6.62862	3.73141
Dutch	7.28855	4.98336	3.30024	2.97993	6.22941	8.2915	6.29097	10.2902	5.70992	2.8646	3.93783	5.85217	6.90845	11.0488	4.86066	5.43618	11.0738	1.61493	9.93415	4.62047	5.17988	7.92901	8.2634	8.55964	8.58229	8.62634	6.80889	8.63549	1.6768	9.41598	5.66718	2.10835	9.33692	8.3818	5.87065	0.74822	5.46181	4.5346	0.73911	1.7016	1.18509	8.29112	3.56307	7.57406	2.60697	3.1683	4.26917	7.85762	3.27167
Dutch	8.03941	5.17945	4.43231	3.30309	6.43638	9.2509	6.52942	9.64464	5.72432	2.09166	4.1781	5.60109	7.30477	11.7733	5.51259	5.50321	10.4437	2.22726	9.70124	5.45037	5.90346	9.02625	8.63513	7.1092	10.1039	8.07038	6.31768	9.61913	2.22646	8.28144	4.41352	2.29757	9.13695	8.42076	5.43625	0.64932	5.69999	5.14478	1.17014	1.59202	1.48872	7.87147	3.61256	7.66211	2.69797	2.92871	4.59337	7.49799	3.81789
Dutch	3.34129	5.62391	3.10143	2.71711	5.91826	8.65656	5.91522	10.2082	6.1881	1.44685	3.91983	4.74098	6.66578	10.8704	4.98849	5.08526	8.52101	1.95508	9.78621	5.13795	6.54997	8.86453	8.37477	6.6806	9.82689	7.82295	6.15834	9.38356	1.66122	7.54024	3.75269	2.06381	8.91531	8.02189	5.60583	1.77234	5.57079	5.05656	0.71482	1.35765	0.75056	8.49721	3.14569	7.76387	2.75768	2.25417	4.45495	6.83495	4.16405
Dutch	7.17634	5.2783	2.78706	3.38923	6.35975	9.26749	6.60463	10.0468	5.59788	1.4967	4.30497	5.19702	6.73791	10.9414	5.1979	5.08388	11.0222	1.94477	9.9399	4.62667	5.33158	7.46931	8.85223	6.97566	9.05385	7.63139	6.30143	9.02234	2.68046	8.16716	4.8132	3.71131	8.20629	8.12347	6.75931	1.09911	5.84244	5.8569	1.21907	1.64145	1.18949	7.83681	3.35418	8.14245	3.52268	2.64507	3.72557	7.32876	3.64649
Dutch	5.78806	5.20566	2.69302	2.47024	6.5879	8.5938	7.61109	9.92457	5.90758	2.07327	3.76459	4.94443	7.02916	11.1032	5.55466	5.19827	9.81744	2.04444	9.73695	5.22079	5.68719	7.8194	8.15756	6.2987	8.32427	7.65668	7.2559	8.67489	1.04749	7.89297	5.47815	1.97643	9.01853	7.64003	5.89007	0.64491	5.6171	5.73623	1.20189	4.4817	1.69181	8.42087	3.49462	7.51374	2.16389	3.63999	4.21941	7.21074	3.79316
Dutch	6.09045	5.05208	2.24114	3.40949	5.2422	7.83352	6.35146	9.59156	4.96928	1.77212	3.54199	4.79912	6.84823	10.5638	5.01236	4.64829	9.8448	1.7101	10.1785	4.42656	5.50979	9.23047	8.66221	6.76529	10.9895	8.27084	6.14799	8.97459	2.1391	7.90233	5.2819	2.47038	9.05959	7.80483	5.5984	1.00868	5.80404	5.20581	0.98752	1.72833	1.57803	7.89501	2.88879	7.33594	3.9243	2.88284	4.03273	7.11343	3.30204
Dutch	4.94694	5.29627	2.00213	2.45116	5.94055	8.32822	5.70049	9.42056	4.76914	1.88978	4.24603	5.41321	6.92195	11.1516	5.19272	5.32286	10.1018	1.5895	10.0936	4.87837	5.94037	8.95562	8.77606	7.63609	11.1005	9.02889	6.62405	9.31679	1.26609	7.55108	4.11634	2.42002	9.16376	8.05164	6.42783	0.75239	5.99118	6.10727	1.28696	2.15896	1.33519	8.54602	3.22652	7.85935	2.64847	3.18813	4.3323	7.94233	3.49483
Dutch	7.23532	5.68449	2.70599	3.57608	6.39868	9.00342	6.00543	10.7371	5.40753	2.23973	3.86486	5.15334	7.09939	11.1376	5.00729	4.76732	10.4067	2.82833	10.1866	4.48525	5.29281	7.23935	8.92459	6.92066	9.05689	7.60239	6.26977	9.27809	3.70745	7.41681	4.39728	2.35028	10.0181	8.29627	6.84703	1.40938	5.7546	4.83146	1.44223	1.41377	1.7973	8.64558	3.80182	8.23414	4.17469	2.28692	4.11632	7.06594	3.46876
Dutch	8.62452	5.4964	4.51368	3.53352	5.96793	8.53699	7.57708	10.7104	4.72141	2.63385	4.6768	5.94722	7.42993	11.8691	5.1599	5.04388	9.29805	1.86317	9.94987	5.08788	5.86859	8.41868	8.9493	9.18226	12.2387	10.1932	6.48875	8.71294	1.08439	7.88664	3.10113	2.03519	8.35109	7.98418	6.53606	1.73437	5.77657	5.70773	1.21191	2.12431	1.78601	8.28432	2.99195	7.28037	2.2076	4.68121	5.006	8.48603	3.49175
Dutch	6.88027	4.81892	4.17487	3.17278	6.28734	8.65786	7.30417	8.1775	6.44947	1.78087	3.3567	5.16726	6.90947	10.8841	4.73986	4.76669	9.7814	1.68413	9.72649	4.50713	5.66967	9.39677	8.02193	7.32518	10.283	8.33338	7.45398	9.11572	1.57854	8.52376	11.7159	2.27661	8.58555	7.58643	6.97223	0.67264	5.31537	5.06266	1.13627	1.50804	1.15247	7.43712	2.71209	7.78207	3.47878	2.80294	4.54218	7.32424	3.66626
Dutch	8.2673	5.23377	4.51448	3.2489	5.82803	9.06687	6.28467	10.3645	5.91502	1.51003	4.19826	5.03744	7.06056	11.4212	5.01588	4.98459	10.1894	1.7377	9.86954	4.65331	5.61095	10.2294	8.48103	8.29654	11.4115	8.99852	6.32034	9.01592	1.38197	9.05303	4.98103	2.08039	8.61671	7.9105	5.12999	0.84109	5.97704	4.86968	1.22363	1.75214	1.32224	7.81148	6.49205	7.38088	2.85851	3.48761	4.41925	7.87946	3.44444
Dutch	7.27601	5.10809	4.63054	3.34022	5.79929	7.67746	5.07318	9.98563	5.58709	1.58947	3.80075	5.21002	7.08244	11.8107	4.29508	5.34056	9.42787	1.30591	9.75621	4.72613	5.28873	9.41697	7.73657	6.9259	10.2558	7.85501	5.31723	9.14901	2.56146	9.12851	2.78656	2.29557	9.0061	7.57258	5.3044	0.68863	5.24176	4.46351	0.87495	1.29386	0.86412	7.37463	3.82894	7.27919	2.83094	2.85956	4.36318	7.72182	3.98389
Dutch
Dutch	6.79856	5.33489	4.22987	3.5156	6.22333	8.23277	6.87169	9.92529	5.42024	2.03668	4.01767	5.92572	7.1538	11.4418	5.44426	4.82754	10.7372	1.72379	9.42557	4.30868	5.20189	8.15049	8.68769	6.96971	10.626	8.01797	6.66944	8.81351	2.14611	8.4638	4.96383	2.08999	8.52235	7.13927	6.29278	0.91715	5.29049	5.73656	0.96503	2.47141	1.49267	7.66471	3.26506	8.15056	2.22103	2.98237	4.14199	7.28895	3.65936
Dutch	7.0185	5.7678	3.58719	3.27474	6.69345	9.08686	6.63294	10.0433	6.19461	1.39426	8.29714	9.74675	7.29911	11.4944	5.52249	6.23265	8.83152	4.6248	9.87846	5.40538	5.62138	9.36857	10.3321	8.19298	10.5165	7.49511	8.53958	8.99763	2.43748	9.49949	3.92821	2.43351	9.67718	8.21972	8.78444	0.61409	5.68524	5.55867	1.46783	2.12001	1.85078	7.7563	3.25877	8.80854	3.97441	2.75285	4.80667	7.52034	3.76813
Dutch	7.14494	5.09506	3.32645	3.40575	7.03921	8.53173	6.02164	10.7259	6.52971	2.4284	4.44987	6.03523	6.87626	11.5558	5.07324	4.98295	9.19074	4.56773	9.67738	5.48933	5.50383	9.97541	9.29691	7.71209	11.9128	8.50498	7.19128	9.12636	1.30633	9.76963	5.41814	2.73214	9.54672	8.50639	6.1837	0.64503	6.56944	4.91075	1.36531	1.48265	1.13872	8.72284	3.42581	7.51957	3.28508	4.01012	5.32246	8.30884	3.89477
Dutch	6.83271	5.196	3.54028	2.70516	6.01117	8.55026	6.15477	10.0566	5.46208	2.06372	3.67947	4.86688	6.83855	11.2324	5.11051	5.1582	10.0991	1.82376	9.76728	5.34515	5.84401	8.96942	8.72124	6.34007	10.5095	8.40602	5.74146	9.14367	1.33955	7.27613	4.437	2.27698	9.15583	7.86478	6.0719	0.58772	6.11191	6.1133	0.89741	1.87012	0.97469	8.13741	3.09725	7.8882	2.02385	2.67023	3.99425	7.37267	3.66131
Dutch	7.24927	5.15102	3.46162	3.14065	5.98604	8.41142	5.37231	10.1635	5.17686	1.29284	3.56043	4.33578	6.87736	11.0162	4.81368	5.23703	10.0191	1.58172	9.80145	4.7472	5.7386	7.94411	8.09411	6.78025	9.03628	7.93268	5.89061	9.19382	1.27836	5.97683	4.2434	2.47977	8.95588	7.75228	5.57723	1.09506	5.69457	5.28829	1.62115	1.39136	0.88258	7.84629	2.83188	7.13476	1.91864	2.02237	3.63098	7.23311	3.97965
Dutch	3.51609	5.17372	2.6545	3.44406	5.20235	8.69672	5.75893	10.1516	5.38175	1.77141	3.85938	4.34819	6.84331	11.4532	4.86033	4.71314	8.58019	2.1455	10.1175	4.66308	5.78585	8.07293	9.35725	7.38881	9.65059	7.46642	6.64395	9.07773	1.06139	6.20853	6.74657	2.08221	9.18491	7.50917	6.73381	2.57738	6.34834	5.15789	0.98862	2.18508	0.19003	9.03631	10.9236	8.94942	2.73232	2.21874	3.8937	6.96998	3.56149
Dutch
Dutch
Dutch	7.58837	5.08122	3.65142	3.73165	6.32608	8.79568	8.03453	9.69741	6.09266	1.99217	3.6531	5.45654	6.86481	11.2402	5.0699	4.18059	10.0403	1.88182	9.83305	5.62984	5.33389	8.68494	8.01992	6.81057	9.04689	8.42414	6.22083	8.75384	2.71478	8.49316	3.24536	2.24878	8.97578	8.11947	4.02237	2.32726	5.67782	4.76106	0.89627	2.15208	1.54336	8.29479	3.98572	8.05323	3.34932	2.58017	3.98943	7.32934	3.45317
Dutch	8.0677	4.98846	3.50248	2.91983	6.08521	9.91525	7.83107	9.25011	6.11474	1.46252	4.52244	5.34425	6.68362	11.2923	5.07449	4.83062	9.39521	2.0036	9.67014	5.51517	5.67469	8.71583	9.03813	7.83049	10.0688	8.46592	6.48372	8.92962	1.6376	8.27039	4.14157	3.44798	9.37047	7.70538	6.15198	0.85018	5.62992	5.47852	1.03556	1.33467	1.81293	8.4	3.25477	7.73279	2.24645	2.42711	3.87076	7.2424	3.75783
Dutch	5.09365	5.08283	3.12435	3.00314	6.44127	10.7668	6.40047	9.57132	6.17406	1.60913	4.55028	5.43126	6.55029	10.8508	4.60321	4.921	9.15627	4.31642	9.76226	5.54742	5.93665	8.20836	9.47932	7.75512	10.8251	7.14047	6.73115	8.9235	1.50629	7.60339	4.7757	2.21405	9.08903	7.67578	7.00056	0.61516	5.7282	4.60146	1.05559	0.95545	1.89672	8.84805	3.23572	8.29337	2.37031	2.142	4.21449	6.97264	3.7768
Dutch	8.89039	6.21035	5.48097	4.68986	6.585	8.98395	7.53081	9.23187	5.62299	1.7988	3.5245	5.42629	7.46964	11.9276	5.67997	5.49003	10.0012	2.36669	9.95191	4.85759	5.72406	8.8089	7.97679	7.757	11.365	8.53848	5.87085	9.17378	1.84937	8.92263	4.29094	2.20788	8.86793	8.72281	5.79811	1.05274	6.28202	5.86995	1.57576	2.18538	1.14729	7.99698	3.9312	8.17593	3.70326	3.81723	4.39257	8.21046	3.76786
Dutch	6.15171	5.54392	2.74715	2.94283	6.28037	8.84052	6.04698	10.5671	5.96964	1.1415	3.70583	5.04928	6.68643	10.8703	4.83944	5.23746	10.1629	1.91818	9.51762	5.43734	5.4287	7.75572	9.21938	7.56128	8.70964	7.96959	6.83021	8.98158	2.03808	7.3433	2.51676	2.03471	8.53681	7.65743	6.21298	1.46875	5.66535	5.46657	1.35523	1.0766	0.87196	8.39606	3.46185	7.52326	2.3583	2.52837	4.02213	6.82784	3.67936
Dutch	6.13289	5.15127	2.51661	3.0304	6.42546	9.04814	7.76829	10.0448	5.91225	2.12287	4.19913	5.24166	6.94192	11.298	5.37055	5.06341	10.4895	2.2665	9.74788	5.01515	5.73127	9.62573	8.56711	9.23905	9.90021	8.62344	6.24999	8.95157	2.21176	7.66944	5.81812	1.96463	9.56614	8.12002	5.82968	2.58132	5.89259	5.79461	1.30578	2.33754	0.72706	7.8964	3.8579	6.50621	2.82811	3.07964	4.85012	7.7893	3.90809
Dutch	3.25869	4.94008	1.85086	2.35203	5.09417	7.85694	5.02634	9.96325	4.58291	1.02216	4.09341	4.57614	6.42834	10.8221	4.96208	4.57897	9.23095	1.60789	9.77671	4.63058	6.11035	8.49812	8.38287	6.58877	9.56807	8.43282	5.65567	8.81603	1.50235	6.66893	5.10036	2.29282	8.55932	7.21161	5.2992	1.04505	5.85306	5.08464	0.52996	1.20334	0.89628	7.9709	2.70209	7.04974	1.98564	3.10344	3.54564	6.83165	3.06647
Dutch	6.12476	5.06944	3.17783	3.49087	6.38788	9.79086	6.72386	9.36796	5.47592	1.30851	4.61165	5.40398	6.9648	11.4652	5.20134	5.08249	8.23863	2.35576	10.0716	4.63556	6.18629	8.29225	8.94273	7.22432	9.78396	8.46931	6.41357	8.74372	1.02316	8.49221	8.54407	2.4575	9.07202	8.15762	6.03892	0.84294	6.00834	6.30622	0.98128	1.82449	1.20396	8.04224	3.45181	7.88977	3.92441	2.54213	4.71481	6.78299	3.76962
Dutch	6.85768	4.98771	3.42724	3.18017	5.51984	9.2849	6.02576	9.56675	6.37642	2.35816	3.97342	5.31291	6.06095	11.5888	5.24924	5.12138	10.5563	2.10371	10.1675	5.32306	5.57607	8.87457	7.75531	7.30954	9.88668	7.55931	6.35344	8.89213	1.13114	6.31285	5.5714	2.638	9.02524	7.72079	6.8866	0.52683	5.86472	6.67438	1.04752	1.57612	1.02102	7.99387	3.40681	7.69229	2.62262	2.82215	4.12597	7.28747	3.48199
Dutch	5.99403	5.49791	1.63576	2.22339	6.05142	9.40166	6.15949	10.2581	5.2595	1.67448	4.35161	6.14661	7.19813	10.708	5.3274	5.1867	10.3611	2.32495	9.67384	5.20329	5.87643	7.24391	8.92716	7.76067	7.96126	7.46939	7.22422	8.83189	1.36105	8.75976	5.38542	2.14172	8.79026	7.46491	6.22488	1.10921	5.66063	6.1301	1.05202	1.80484	0.83285	7.85555	4.13464	8.38794	2.35763	1.85346	4.01384	6.72761	3.53192
Dutch	6.63932	5.34017	1.42842	2.64452	6.52484	9.54916	7.5589	9.78095	5.50544	1.76817	4.6874	6.54022	6.57182	10.9645	4.39252	4.52224	9.93686	1.33937	9.79791	4.67186	5.2327	7.4889	12.1317	8.5689	8.60768	7.22214	7.03253	9.21338	2.69704	10.2981	6.21959	2.60011	8.75133	8.12283	9.71794	0.92531	5.67746	4.96512	1.41323	1.57151	1.7479	8.37812	4.81643	7.44467	5.19192	2.8956	3.81147	7.20944	3.6343
Dutch	7.58557	5.84881	3.69517	3.73923	6.15455	8.63702	6.93242	9.51616	5.20954	1.75826	3.99621	5.42569	7.21734	11.5399	5.38751	5.46987	9.98777	2.37492	9.94999	4.93191	5.71589	8.41803	8.90066	7.09637	9.38761	8.06326	6.4515	9.42564	1.40116	8.763	4.61886	2.1384	9.16215	7.98037	6.82305	1.19409	5.83148	6.13262	1.17694	1.36876	1.01484	8.22199	3.84143	7.82422	2.40845	2.34493	4.00445	7.22141	3.61356
Dutch	7.58091	6.20269	4.06618	4.06335	6.57358	9.18923	6.39969	10.0587	6.32325	1.61031	4.85696	5.57599	7.05882	11.6259	5.6023	5.99681	9.96144	3.53425	10.022	4.83179	5.53986	8.33214	8.91346	7.80373	10.6971	8.24401	7.54043	9.19459	2.40535	7.99714	4.87294	2.61436	9.60106	8.35084	6.00846	1.42571	6.15766	5.70617	1.19137	1.76863	1.37531	8.49648	4.09089	7.61153	2.99644	2.80732	5.30494	7.47526	3.83161
Dutch	6.86338	5.23289	2.68687	3.18402	6.73427	9.435	7.00693	9.83362	6.40144	1.80369	4.9005	5.98761	7.10727	11.456	5.20959	5.01622	10.2277	2.65564	10.1763	5.06279	5.58737	7.42912	10.1246	7.21041	8.22955	7.26438	6.82773	9.16895	2.23644	8.74245	5.1526	3.46005	9.24758	8.37122	9.71003	0.93631	5.84099	4.82504	1.25872	1.68369	1.26473	8.12952	4.46681	7.96609	4.66005	1.9624	3.79201	7.25529	3.68584
Dutch	8.28163	5.77469	4.88579	3.99226	6.32479	9.17826	6.48416	10.4557	5.99939	1.81006	4.56637	5.07291	7.13088	12.0446	5.29231	5.44789	10.4852	2.6228	10.1364	5.52258	5.87782	7.5072	8.97749	7.44929	10.5428	9.35207	6.49951	9.30912	1.57091	7.88142	5.05848	2.19747	8.75461	9.02519	7.20373	0.58041	6.10719	6.22661	1.32124	2.12163	1.64637	8.1625	3.56029	8.61057	3.21959	3.57561	4.22574	7.826	3.85072
Dutch	2.56087	5.09842	2.5244	2.96188	5.11554	9.22834	7.02942	10.0222	5.46731	2.80137	4.25263	5.3944	6.8773	11.1634	5.13712	5.35519	8.389	1.9228	10.1177	5.36439	6.8937	8.92208	9.52155	8.39663	9.91904	7.96368	6.87767	9.13714	2.00944	7.94725	3.58163	1.9256	9.491	8.49455	8.05116	0.93967	6.0136	5.73553	1.35095	1.70882	1.03814	8.35068	3.31492	7.78842	3.86177	2.61688	3.96577	6.48344	3.79702
Dutch	4.42483	5.60158	3.82759	3.48485	5.93134	8.86818	5.59267	10.1746	5.27265	1.90978	4.09667	5.35295	7.36083	11.6169	4.97093	5.0321	9.17593	2.26872	10.235	5.28424	6.5846	10.1579	10.2321	8.08809	11.8162	8.54447	7.04602	9.20216	2.14821	7.53132	4.69168	2.48779	9.4342	8.24504	5.88179	1.85397	5.98497	5.72532	0.97803	1.13882	0.75885	8.41335	3.70958	7.11341	2.71644	3.34411	4.24225	7.27844	3.68091
Dutch	3.09555	5.29991	2.9398	2.57868	5.31059	8.44313	6.19397	9.60362	5.93818	1.55363	4.20074	5.24465	6.62476	11.0245	5.04175	4.88282	8.55637	1.90312	10.2243	5.12144	6.30211	8.76047	8.90635	7.3831	10.0785	7.67452	6.15385	9.23697	1.15873	7.83247	4.14002	2.45907	9.42365	7.71143	5.10883	0.97493	6.25943	4.5794	0.87359	1.70184	1.03872	8.03272	2.54231	7.3906	2.679	2.95969	3.8965	6.89091	3.5566
Dutch	5.20733	5.5731	3.2153	3.21014	5.64371	9.2758	5.82846	10.1487	5.43658	1.56008	4.2205	5.76387	7.25426	11.2142	4.78185	5.35362	9.99262	1.69412	10.3072	4.9375	5.74828	8.34457	9.15976	8.32117	10.7618	8.15254	7.16585	8.69599	1.34044	7.98194	6.37673	2.34069	8.77195	7.57289	7.62657	0.65876	5.88374	6.10741	0.91664	1.12317	0.72024	9.25487	3.55478	8.10393	2.78934	2.50787	4.21691	6.94645	3.19437
Dutch	7.18778	5.28698	3.90144	3.17124	5.77397	8.46714	5.86126	10.2768	4.9677	2.60745	4.09953	5.41907	7.55508	11.9297	5.18344	5.35829	9.98438	2.14878	10.0955	5.43675	5.42756	9.55011	8.91359	8.76341	11.9275	9.16937	5.90959	8.83765	1.3579	8.31727	1.63317	2.08249	8.84322	7.83444	6.02314	3.92289	6.00858	5.18374	1.25738	1.85178	1.38165	7.8619	3.2871	8.2898	3.21251	3.99777	4.05263	7.8122	3.62962
Dutch	7.08938	5.58618	3.29494	3.40481	5.88093	8.53952	5.93055	9.56589	5.47187	1.76525	4.17116	5.27535	7.35405	11.5771	5.0377	5.15369	10.6356	2.00641	9.83685	4.63294	5.55035	7.93999	8.3359	7.04222	8.54074	8.43307	5.9502	9.1791	3.60739	8.54467	4.12458	2.07728	8.96889	8.11526	6.66706	1.14138	5.84527	5.13011	1.23083	1.74823	1.4403	8.69695	2.95975	7.57442	2.08374	2.61066	4.01401	7.21381	3.71219
Dutch	3.61882	4.81181	2.38627	3.17688	6.67997	8.37363	5.31587	9.81458	6.06343	1.78087	4.34324	5.72266	6.86434	10.9592	5.07983	4.68021	8.17522	3.22636	9.87496	5.13627	6.21565	9.37882	11.5693	7.41874	11.4693	8.19004	6.68318	8.54257	4.11941	7.10123	3.73341	2.21744	9.17776	9.09215	3.88152	1.03933	6.13527	5.84263	1.23281	1.51072	1.28153	8.88388	2.52356	7.35607	3.28624	3.58422	4.59466	7.39795	3.61741
Dutch	7.51107	5.5849	1.71243	3.08175	6.72341	11.0761	7.02083	10.7402	6.70611	1.77121	5.33231	7.19228	7.16543	10.8687	5.12748	5.77913	12.1904	2.76417	10.3047	5.52048	5.88597	7.78934	13.2334	9.5151	8.4656	8.43398	10.2792	9.24312	2.43623	7.73282	5.68806	2.84392	9.77468	8.98315	8.92412	0.77341	6.19259	6.91241	1.49458	3.06105	1.79798	8.21773	5.29848	7.29897	5.16658	2.73485	4.74313	7.34738	3.85767
Dutch	6.42306	5.26481	2.92703	2.44835	6.05841	8.05409	5.11696	9.85349	5.36779	2.10343	3.74808	5.05365	7.26012	11.0547	5.37343	5.14744	9.74664	2.36917	9.83631	5.81812	5.76884	9.45768	8.50973	7.25077	9.71317	8.24134	5.7986	8.87696	1.57565	7.15953	4.703	2.08886	8.85359	7.99727	5.82451	1.34054	5.61739	4.33273	1.15017	1.30648	1.17918	7.67436	3.19593	7.5796	2.03007	2.83474	3.90319	7.37063	3.59769
Dutch	5.57968	4.75434	3.98867	3.59519	4.92106	9.4737	6.48012	9.96113	5.41714	1.76593	3.95694	5.45693	7.05419	11.5774	5.01342	4.75692	9.59854	2.00224	10.1455	4.85744	5.84011	8.06934	9.14436	8.0256	9.88033	8.88096	6.60276	8.96027	1.33726	7.48427	4.91486	2.17904	9.20249	7.83275	6.36856	1.01966	5.992	5.3676	1.16292	1.99442	0.93435	8.29099	3.23483	7.34684	2.64233	3.31133	4.18046	7.30076	3.43293
Dutch	6.71593	4.59271	3.44265	4.13371	7.15792	8.75857	6.47049	10.5452	6.22311	2.06556	5.05661	5.73856	6.8193	11.6156	5.04923	5.58004	10.9786	4.75386	10.0308	6.08849	5.6761	9.04655	8.47426	7.20216	11.485	8.22985	6.78795	9.13705	2.89132	7.99926	5.93466	2.38616	9.42359	8.52528	6.02899	0.49721	5.8049	4.87308	1.5659	1.40083	1.11416	8.02903	4.00463	7.84691	4.46971	3.00732	5.61597	7.65543	3.61136
Dutch	6.67707	5.09735	3.64551	3.54545	5.12739	7.50462	5.30702	10.075	5.4154	1.57029	2.99438	4.35788	7.00076	11.5514	5.29434	4.89934	10.3215	1.39405	9.95043	4.97245	4.72306	8.71569	7.6259	6.71032	9.90657	7.81203	6.11039	8.93871	1.18883	8.37208	4.1304	2.09996	9.04357	7.5434	5.49179	1.92867	5.33037	5.01821	0.7281	1.31848	0.9992	7.79875	2.69636	7.84998	1.95433	2.87878	3.93688	7.21804	2.99235
Dutch	5.13627	5.08279	2.8241	3.12281	6.40384	8.71395	5.81663	9.73753	6.3835	2.81929	4.67689	5.68017	7.23296	11.2432	5.06986	4.78786	10.1048	2.33957	10.0339	5.23703	6.09939	7.14201	9.48667	7.5974	8.23551	7.38094	7.2705	8.82185	1.40556	8.85498	4.76965	2.16971	9.04408	7.05281	6.93137	1.23051	6.07084	5.78156	1.00773	1.94615	1.34747	7.76665	4.37186	8.78718	2.70174	2.98859	4.3816	6.98098	3.63733
Dutch	6.65528	5.16891	2.93026	3.41766	6.63942	8.9503	6.35142	10.3465	6.15647	2.12351	4.7575	5.80469	7.05017	11.0084	5.3202	5.23748	9.63057	2.21273	9.89274	4.99192	5.58024	8.10914	8.83697	7.26948	9.02406	8.21503	6.11632	9.25	2.35753	8.236	5.13277	2.67438	9.21834	7.93636	6.37514	0.77221	6.22423	5.71806	1.31703	2.16702	1.60729	8.01729	3.73408	7.92988	2.75554	2.77779	4.39431	7.26052	3.80427
Dutch	7.21298	5.20661	3.31006	3.14723	6.19125	8.4053	6.29921	9.63606	5.46766	1.54771	4.26338	5.39854	7.31862	11.1062	5.18547	5.62976	9.79379	2.37204	9.74158	5.35988	5.54024	7.64667	8.18965	6.52712	10.5289	8.09825	5.89374	9.10346	1.41063	8.25538	3.41521	2.88137	8.66542	7.84494	6.03216	0.78239	5.7082	5.51136	1.56992	1.62375	1.46769	7.79233	3.48635	7.53196	2.25138	2.6633	4.37516	7.24775	3.54028
Dutch	4.80396	4.88667	3.87636	3.06388	5.44605	8.01865	6.35794	10.2002	5.11869	1.88221	3.69466	5.03327	6.96498	11.2043	5.03091	5.47954	8.68108	2.092	10.1065	4.85391	5.87448	8.58323	8.61178	6.9798	11.221	8.53471	6.21568	9.01328	1.54712	8.70966	3.54843	2.2147	9.09356	7.69149	4.73459	1.02034	5.73075	4.85016	0.84077	2.01693	1.06285	8.12885	2.80094	7.77483	3.4508	3.24441	4.56765	6.97231	3.46411
Dutch	5.5678	5.31008	2.05763	2.40625	5.35218	10.2812	5.25061	10.341	4.73226	1.58514	3.53998	4.91278	6.8884	11.0247	5.0142	4.18414	9.39519	1.87923	10.0671	4.89933	5.68626	8.01529	7.87529	6.54465	9.52494	7.38268	5.80633	9.05026	1.38109	6.3384	6.40627	1.88946	8.64453	7.36374	5.77238	0.98334	5.9069	5.9303	0.95875	1.16742	1.17731	7.8041	3.16209	7.1517	2.3862	2.66417	3.95233	6.98473	3.61462
Dutch	8.38208	4.55968	3.85513	3.03586	6.54421	8.17844	5.8818	10.1659	5.63065	2.34143	4.14277	5.50023	7.05483	11.2741	4.91657	4.61561	9.77502	1.69999	9.82987	4.91549	6.11567	8.81917	8.59312	8.293	11.0819	8.88475	6.13097	9.62482	1.82756	9.06278	6.4482	2.75495	9.25678	8.37298	5.81556	2.41504	5.8763	5.36466	1.09649	0.97993	0.97206	7.77005	3.65091	7.80857	2.06881	3.79201	4.34909	7.65058	3.87173
Dutch	3.24326	5.37131	3.04321	4.62278	5.83098	8.19253	5.30208	9.51041	5.63561	1.41697	4.22362	5.2221	7.37834	11.3879	5.1612	5.49808	7.74341	2.33984	9.72625	5.48403	6.39323	8.37704	9.68395	7.27553	7.94892	8.17759	6.69714	8.94706	2.27982	7.28134	2.56008	2.62213	8.71331	8.09482	6.2776	0.85685	6.14268	5.22407	1.46438	1.74999	1.14614	8.31596	2.46075	7.65434	2.39099	3.15155	3.95026	7.12937	3.7502
Dutch	9.484	5.64134	6.57775	4.83653	5.74832	8.93934	6.33051	9.68884	6.2536	1.96541	4.71335	6.40276	8.06383	12.504	4.87366	5.10769	10.3025	1.85455	9.60645	4.71333	5.2122	9.51609	11.2266	8.25763	11.3282	9.04246	6.75996	9.00632	2.06531	8.49947	4.51449	2.64293	8.61867	7.97006	6.39453	0.78029	5.73966	5.61748	1.37424	2.10631	1.77579	7.5752	3.95254	8.14662	3.33098	3.8159	4.78746	8.42763	3.54877
Dutch
Dutch	7.41066	4.97982	4.47611	3.70426	6.16544	9.02276	6.7917	9.70678	5.57587	1.55664	3.83573	5.33946	7.16874	11.8553	5.23546	5.59629	10.6775	2.25183	9.8045	4.52905	5.43024	8.43404	8.4975	6.93096	10.9135	7.75618	7.02659	8.69621	1.28182	7.04534	4.24235	3.29042	8.93446	7.92584	6.11955	1.17231	5.94136	5.60839	1.07226	2.0582	1.09995	7.83633	3.70349	7.87073	3.24241	2.69356	4.08756	7.92955	3.56531
Dutch	6.34156	5.00919	5.13759	3.91095	5.73911	8.83648	6.51175	9.98702	5.94248	1.9667	3.71891	4.96055	7.48719	12.2709	5.1704	4.7351	8.11661	1.93731	9.4656	4.51219	6.15994	8.82536	9.55633	7.84551	10.7013	8.51174	6.37916	8.69234	1.63471	8.24525	4.9445	2.20773	8.73073	7.89695	5.88316	0.75005	5.70583	4.59598	1.23224	2.45553	1.19173	7.7557	3.28663	6.75986	3.15596	3.21161	4.25461	7.66995	3.52476
Dutch	3.13988	5.07943	2.84439	3.33356	5.15314	10.7568	5.5107	10.2207	5.39424	1.34881	3.44031	4.92976	7.07209	10.9045	5.10408	5.49772	7.93707	1.89752	9.62558	4.2724	6.10873	8.9064	9.32327	7.786	10.4996	7.55403	6.36683	8.80679	1.71714	7.76997	4.19184	2.197	8.01372	7.70325	6.79938	0.47823	6.01091	5.00802	0.99747	1.6489	0.9887	7.91709	2.74599	7.68449	3.47384	2.65831	3.59168	7.0263	3.46572
Dutch	6.94711	5.68114	3.50386	2.89131	6.60775	8.15054	4.7886	9.55054	5.82125	2.18711	4.68161	5.54587	6.47274	11.3704	4.49404	4.28177	8.78377	2.62409	9.58344	5.13141	5.67164	8.96075	9.38481	7.62272	10.2023	8.2936	7.36986	9.50373	0.98219	9.13342	4.5009	2.23673	9.29772	7.77474	5.84028	0.82989	5.5407	4.29951	0.98881	1.44907	1.39429	7.31618	3.26603	8.06977	2.72831	3.34269	4.43232	7.45305	3.50083
Dutch	6.59497	5.09401	2.76416	2.93289	7.40238	8.33045	6.1867	10.3902	7.70376	2.22032	4.48193	5.49901	6.78693	11.137	5.7072	5.27447	11.3972	2.63815	9.76479	5.14474	5.57709	8.7226	9.15333	8.69768	10.4214	7.92717	9.02559	8.82022	2.71634	7.46466	8.53663	4.35284	8.3007	7.60786	8.1745	0.67386	5.91904	6.3648	1.23099	2.94414	1.63326	8.0622	3.69927	9.31188	2.15396	2.38391	4.09315	7.18593	3.84226
Dutch	3.31843	5.95099	4.25868	3.85081	5.39546	8.83285	6.26292	10.0641	5.86957	1.73978	4.5456	5.98911	6.84642	11.357	5.46167	5.93529	8.81792	2.21303	9.76491	4.79598	6.54826	9.17755	10.0162	8.40617	11.1506	9.27094	7.30943	9.56705	2.57118	9.74638	4.49052	2.24152	9.39474	8.62058	6.87882	0.88909	5.80145	5.58325	1.17542	2.05707	0.86867	8.19401	3.16929	8.53694	3.1057	3.91045	5.01529	7.04794	3.89385
Dutch	7.55915	5.39392	3.88108	3.51245	6.10674	8.74217	5.29615	10.5901	5.87315	1.76446	3.55346	5.03024	7.31099	11.1027	5.25262	5.48665	8.94959	2.59388	9.68171	4.67289	5.53941	8.73346	8.72116	7.21636	10.5495	8.28432	5.61956	9.08149	1.88372	8.28541	6.24177	2.45716	9.36719	8.11886	5.19971	1.17253	5.95837	6.16866	1.28907	2.14605	1.11731	8.20842	3.62281	7.23112	2.74898	3.32593	3.84643	7.62881	3.84252
Dutch	5.79519	5.42513	4.00037	3.63776	5.68249	8.26229	5.54358	10.8641	5.94205	2.0068	4.17356	5.07624	7.15148	11.8058	4.95926	5.19532	9.75465	1.942	10.1827	5.51197	6.57499	9.48417	8.47021	6.92359	10.9843	8.52688	6.46163	9.10213	1.81195	7.59771	6.18359	2.11655	9.46884	7.67946	5.9387	0.63476	6.11745	5.31111	1.19633	2.06838	0.9397	7.6093	3.4221	8.52358	2.72097	2.85809	3.62109	7.21833	3.81845
Dutch	2.12073	5.39185	1.96009	2.80022	5.76504	8.51749	5.79791	9.93192	5.78756	1.14016	3.94352	5.92046	6.69855	10.741	5.13916	4.82451	7.98537	1.88345	9.69918	4.70841	6.34268	9.37503	9.19174	7.19754	12.1749	8.92577	6.61125	9.13176	1.79907	8.32847	2.30322	2.14694	9.77812	8.21761	5.96677	0.57231	5.70606	5.62376	0.95715	1.39974	0.93753	7.70072	2.74109	8.17937	2.86046	4.01234	4.33889	6.74273	3.72507
Dutch	3.9931	5.20904	3.698	2.93822	5.49602	8.73655	5.97479	9.52743	6.01525	1.36642	4.01809	5.0353	6.94714	11.296	5.5102	5.57994	8.91027	2.06029	9.88298	4.87962	6.04381	9.16411	8.79465	7.39127	11.0378	8.14046	6.5481	9.16942	1.73213	8.54071	4.78485	2.27931	9.3936	8.13202	6.19753	0.61665	6.09842	6.16696	1.18247	1.56617	0.84992	8.35342	3.22559	7.59061	2.604	2.68263	4.46929	6.92396	3.90348
Dutch	2.80136	5.13698	3.35764	3.44386	5.11628	8.93881	6.29262	9.52311	6.08877	1.42339	4.28546	5.30189	7.1001	11.5323	5.72078	5.59322	7.6987	2.58947	9.8878	4.85797	6.09956	9.86929	9.13843	7.7964	11.1595	8.39642	6.69557	9.07999	1.26655	7.97982	4.16646	1.87858	9.36555	8.24334	6.45305	0.65261	6.07353	6.6099	1.32101	1.21614	0.92083	7.69624	2.50693	8.30597	2.76814	3.28158	4.42064	6.8792	3.68961
Dutch	6.66284	5.28434	3.78594	3.2188	5.8797	9.89126	6.60643	10.5035	6.6993	1.73544	3.99053	4.88251	6.9732	11.2415	5.47421	5.03881	9.26173	1.77081	9.64025	5.35719	5.95599	9.00448	9.2133	7.1094	10.1798	8.05784	6.47614	9.39677	1.71689	8.6859	5.92591	2.66864	8.92849	7.9925	6.14244	0.69676	5.68586	5.98082	1.18104	2.0699	1.32214	8.09986	3.68941	7.69341	2.62556	2.70942	3.79674	7.24402	3.69503
Dutch	6.74444	5.35404	3.2129	2.7573	6.13288	8.34852	6.06963	9.70768	6.2248	1.56146	3.60882	5.29828	7.00253	11.1221	4.98707	5.39941	10.4368	2.0838	9.72172	4.30711	5.69419	8.07445	8.55197	8.41347	9.51014	7.44139	6.17124	8.8743	1.92953	9.36178	6.86383	2.10537	9.61476	7.95954	6.11132	1.5559	5.86705	3.98409	0.90479	1.75554	1.14345	7.86928	3.30148	7.21037	2.88856	2.45835	4.08766	7.06875	3.72527
Dutch	2.87499	5.63759	3.14377	3.85448	6.66413	8.7546	6.26956	9.2502	5.9433	1.72172	4.13907	6.05369	7.15199	11.4498	5.18824	5.86609	7.70424	3.24276	9.95976	6.08317	6.61965	8.54136	9.85763	7.43899	11.2205	8.83871	6.96911	9.61669	1.69655	9.37591	4.03337	2.25634	9.97564	8.68364	7.26525	1.01836	6.18426	5.3744	1.18342	1.65831	1.02217	8.48959	2.66051	8.35674	3.91814	3.0769	5.18635	6.75579	4.29729
Dutch	7.07781	5.16995	3.18416	3.04045	6.29023	9.12557	6.90109	9.95444	5.6674	1.99247	3.89476	5.40395	6.99959	11.0689	4.6876	5.37187	9.86745	2.09214	9.66291	4.58162	5.30518	6.57735	8.48306	6.86685	8.76151	8.00373	6.3675	9.03295	3.84216	8.00185	5.55314	2.70071	8.35979	8.44326	5.97882	0.76056	5.50813	5.75337	0.61595	1.90919	1.07291	7.52173	3.66084	7.57822	3.71837	2.54221	4.40168	7.15547	3.78726
Dutch	8.07472	5.60489	3.94231	3.74027	6.42431	8.86538	6.47385	10.4325	6.57524	1.94076	3.99533	5.41987	7.22373	11.2685	5.1817	5.40443	9.85869	2.60088	9.78338	5.01209	5.44718	8.8942	9.38764	7.83887	10.2721	8.59817	6.6193	9.1278	1.4182	9.27619	4.98752	2.38212	9.05053	8.22728	6.38209	1.19909	5.96333	5.57199	1.22767	1.51554	1.53828	7.78214	3.02125	7.48714	2.15991	3.25412	4.30681	7.39629	5.16383
Dutch	5.28897	5.69929	3.2093	3.28166	5.97838	8.99905	6.66288	10.4484	6.72972	2.41627	4.74949	5.72716	7.21471	11.3334	5.6103	5.79394	10.1425	2.26543	10.2931	5.20882	6.22891	8.9876	8.825	7.49931	10.3703	7.84614	7.64712	9.08148	2.15626	8.10194	6.03157	2.6185	9.29752	7.91881	6.53649	0.8663	6.4769	5.45896	1.55377	2.03343	1.506	8.81994	3.89374	8.11979	2.93965	3.06219	4.44613	7.15305	3.80551
Dutch	6.79822	5.47072	3.21603	3.36613	6.59031	9.25613	6.15775	9.80993	5.70228	1.99044	4.06794	5.85062	7.0572	11.2505	5.39125	5.74544	10.4379	2.25212	9.82361	5.20761	5.58397	8.83708	9.13918	7.72702	9.20475	7.70034	6.46764	9.13834	2.06253	7.81951	2.51307	2.43268	9.84577	8.2015	5.95652	0.75742	6.10908	5.75718	1.40999	1.33553	1.38478	8.55401	3.81307	7.29656	2.69095	2.75364	3.968	7.3248	3.9565
Dutch	2.07374	4.94619	2.93505	2.88019	5.13805	8.32143	5.67942	9.62944	5.24911	0.97089	4.21737	5.54099	6.91493	11.1079	5.30142	4.95039	8.64188	2.2408	10.4222	4.7445	6.02041	8.93639	8.37897	6.99724	11.2418	7.32701	5.74652	8.91438	1.8675	6.94624	3.50873	1.71057	8.87566	8.06909	5.94996	0.5048	6.2446	4.33606	0.9488	1.48355	0.62479	8.84647	2.80248	7.77025	3.09237	3.26435	4.23353	6.91053	3.54915
Dutch	6.85668	4.98127	2.88324	3.18096	6.67926	8.91814	6.56251	10.3016	6.24385	1.42509	4.47391	5.3672	6.84971	11.0787	4.87908	5.18619	9.98104	2.24264	9.5333	4.76157	5.19602	7.96202	8.36503	6.76025	9.27682	7.74871	6.27453	8.99049	3.05327	8.82243	6.93485	2.29942	8.55628	8.03597	6.19317	1.8551	5.4868	5.85216	1.15811	1.51043	1.19761	8.08462	3.23047	7.5712	3.11169	2.30808	4.43997	6.93829	3.5624
Dutch	8.35245	5.18143	4.46798	4.24642	7.22097	9.08281	6.68896	9.75644	6.20448	2.59632	4.72248	7.12469	7.32021	12.116	5.74664	5.67113	10.5958	3.1028	9.83321	5.4729	5.26036	9.3631	8.39362	8.22099	12.6094	9.32215	5.97694	8.97723	1.54308	8.60266	6.26638	2.25221	9.4895	9.32798	5.36217	0.75483	5.82163	4.89939	1.5655	2.25789	1.36233	8.71833	3.14799	8.14819	3.18868	4.61051	4.96803	8.46679	3.67193
Dutch	8.45546	5.66614	2.86725	2.70272	6.52315	9.31625	6.25449	10.8806	6.08176	1.85266	4.05267	5.62115	7.08807	10.8951	5.20221	5.70474	10.5149	2.56498	9.90375	4.96722	5.61674	8.96425	9.00326	7.68473	9.60496	8.69049	6.64147	9.22783	1.95796	7.67296	2.62723	3.00408	9.20665	8.54725	6.0056	0.87125	6.10109	5.85621	1.07401	2.09096	1.29032	8.70186	3.61507	7.92496	2.87423	2.66265	4.19101	7.1945	3.71205
Dutch	6.63218	5.29947	3.35647	2.27431	5.90345	7.75382	5.61502	10.0839	5.6382	1.83188	3.57026	5.13353	6.86294	11.2814	5.14496	4.70943	10.5077	1.81105	9.91143	5.59325	5.61638	8.04954	8.34959	6.76267	9.35577	7.63887	6.04252	9.00901	1.08595	7.60126	2.00434	2.05228	9.34704	7.65737	6.05255	0.93146	5.29865	5.2007	1.15665	2.33462	1.6567	8.59838	3.43292	7.37366	2.49196	2.68561	4.14547	7.0845	3.46851
Dutch	7.22518	4.95108	3.5616	3.54315	6.17467	9.7592	6.77863	10.0671	5.86422	1.76838	4.42442	5.78636	6.8606	11.5131	5.27158	5.59803	10.5122	2.15813	9.89462	4.83301	5.97165	7.75603	8.8511	7.58103	9.53582	8.0742	6.94684	8.90465	1.63619	7.66292	7.32199	2.73384	9.38278	7.97369	8.31025	0.83473	5.74834	4.95861	1.27905	1.39444	1.04562	8.19943	3.48609	7.52748	3.44361	2.59866	4.0999	7.51203	3.73128
Dutch	3.69614	4.59905	2.35868	2.74451	6.12148	8.64455	5.82427	10.4148	5.59741	1.36338	4.35216	5.6404	6.29626	10.8496	5.186	4.61549	9.6881	1.93325	9.66704	4.81261	5.99359	9.55542	9.34582	7.83599	11.2993	9.111	6.53896	9.02444	1.41376	7.20377	5.23502	2.71009	8.99841	7.71855	7.08692	3.06418	5.86087	5.61081	1.2379	1.14526	0.73702	7.83033	3.22788	7.50859	2.1273	3.49631	4.40657	7.43671	3.7679
Dutch	3.09015	5.37494	4.83963	3.85946	6.35606	8.79367	6.57953	10.8615	5.66611	1.50027	4.01454	5.66826	7.31258	11.2701	5.42716	6.06196	8.29298	3.08293	9.86473	4.99727	6.13656	9.42041	9.99485	7.78687	11.4735	8.5382	7.15582	9.46506	3.00848	8.6836	2.40187	2.57211	8.94481	8.41564	7.19407	0.96526	6.1401	5.70853	1.26054	1.71273	0.96517	8.04495	2.7659	8.22867	2.69175	3.52616	4.71081	7.10134	3.9466
Dutch	6.7803	5.03065	3.48264	3.23317	6.16964	8.39082	6.1635	10.4367	5.27279	1.7819	3.80999	4.98296	7.04802	11.2516	5.08961	5.08946	9.58289	2.18212	9.48544	4.96749	5.53208	8.35169	7.99369	6.86986	10.1497	7.59933	5.88495	9.03298	2.30601	8.19073	4.46465	2.96046	9.08994	7.65518	5.23683	0.79433	5.80458	5.12358	1.03439	1.60062	1.39608	7.96198	3.62621	7.33609	3.13551	2.76845	3.89654	7.11498	3.37124
Dutch	3.81932	5.16036	4.27897	3.68759	5.71556	9.10001	5.93572	9.76678	5.17377	1.45912	4.34955	5.77975	7.24699	11.439	5.15422	5.16165	8.80662	2.09286	9.9631	4.56972	6.3319	8.40103	9.21471	7.28453	9.43235	7.86124	6.79489	9.34451	2.13977	7.75799	4.56179	2.65087	8.76821	8.25555	8.93959	0.79956	5.86482	5.50712	1.47702	1.40429	0.68255	8.50045	3.1439	7.97057	3.89477	2.93236	4.22952	6.90271	3.71903
Tanzanian	8.41689	6.16446	3.41471	2.96967	6.80604	9.57075	6.01201	9.31603	6.13127	1.72047	3.96723	5.69329	6.67003	10.9236	5.03049	4.63554	8.71187	3.06629	9.46412	5.53966	4.86557	8.99637	8.47189	6.97061	10.5866	8.2429	5.76645	9.70976	2.08979	8.94848	5.70879	1.93277	9.1816	8.29839	5.51378	0.818495	5.84302	4.45094	0.32431	1.48638	1.70572	7.78709	2.92293	7.58568	2.43242	2.61834	3.78562	6.59457	3.74583
Tanzanian	8.49498	5.91141	4.18259	3.1292	7.69048	9.09844	6.50014	9.7272	6.87076	1.64368	4.77346	6.15916	7.55767	11.5075	5.56586	5.67445	10.7275	3.42864	9.87653	5.39208	5.60528	9.68597	9.12381	8.81095	11.4186	8.60169	7.28038	9.49183	2.67555	9.40509	6.46048	2.19516	9.18634	8.36136	7.1891	1.66931	6.06534	5.30736	0.79707	2.08593	1.98727	8.40354	3.93375	8.37941	3.20695	3.07546	3.76491	7.33157	4.24962
Tanzanian	7.90348	5.5727	3.30396	3.2202	6.43078	8.46201	6.34414	9.11594	4.97347	2.07152	3.65205	4.60119	7.16274	11.2014	5.13894	5.05917	9.33986	2.87791	9.75333	4.80542	5.76196	10.0462	8.10367	7.48997	11.6667	8.76303	6.07465	9.21469	1.64463	7.2093	4.22228	3.74756	8.97044	8.04477	5.78118	1.14478	6.03158	5.61393	0.89174	2.82056	1.61614	7.82466	2.79723	7.38783	2.91377	2.52474	3.6028	7.14536	3.94264
Tanzanian	8.57933	5.35431	3.96965	3.65967	6.18672	8.57484	6.33414	8.89493	5.56708	2.31449	4.42666	5.48712	6.16949	10.5835	5.04475	5.14191	9.16277	2.62767	9.22405	5.14881	4.96253	10.3406	8.1394	7.04806	12.3527	8.62749	5.8525	9.00077	1.8623	7.37345	6.48803	1.74879	8.06971	8.08426	5.39005	2.46162	5.59805	4.20463	0.81544	2.21388	1.48053	7.85623	2.52018	7.87632	2.9173	2.93903	3.70294	6.92861	3.54685
Tanzanian	8.91652	5.63232	2.22156	2.81233	6.72942	8.01043	6.28246	9.25322	5.71535	1.72135	3.79639	5.47802	6.66887	10.4205	4.88525	4.92352	9.51819	1.69297	9.22105	4.87723	5.25907	7.24165	8.73131	6.70665	8.85613	6.9402	7.73632	9.50213	2.08588	7.21014	5.69356	2.14566	8.19828	7.75669	10.3464	0.974945	5.26236	4.7763	0.58677	1.91905	1.53034	7.70989	3.00801	7.6472	2.84674	1.96266	3.31635	6.23698	3.32351
Tanzanian	8.90669	5.91772	2.14605	3.09356	6.02321	8.08607	6.97136	9.11711	6.43771	1.47318	4.66833	5.93053	7.30372	11.0432	5.46519	6.08585	11.2132	3.31264	9.92055	5.78608	5.99966	8.78026	8.75766	7.39661	9.35202	6.84347	7.45387	9.89943	1.54462	8.58914	4.38565	1.70602	9.11377	8.15107	6.24334	0.677435	6.03566	5.41974	1.00046	2.12194	1.88563	7.9426	3.38592	7.68682	2.25737	2.05413	3.78165	7.18792	4.04927
Tanzanian	7.68726	4.84478	2.70262	2.60421	6.84732	7.53698	5.66111	9.86444	5.30628	1.63554	4.22647	5.7858	6.77649	10.8002	5.18107	5.58003	10.0492	3.03695	9.41484	5.64526	5.83605	7.93009	9.06335	7.34407	9.49662	8.03136	6.90874	9.39865	1.83516	8.75868	4.5724	1.47104	8.63574	7.46689	5.07671	0.633545	5.60661	5.04697	1.02497	2.21251	2.42447	7.49415	2.922	7.86512	2.11041	2.23473	4.13234	6.21955	3.59325
Tanzanian	7.66664	6.0499	3.17485	2.54994	7.27473	8.7316	6.98526	9.24117	6.27351	2.14746	3.92955	5.87167	6.92777	10.9119	5.27891	5.29366	9.16966	2.28103	9.67917	5.0732	5.67054	8.72048	8.00562	6.00137	9.98666	7.49228	6.28934	9.60549	2.07513	8.64194	5.5695	1.8959	9.06743	8.05954	5.35264	0.686295	6.16643	4.62115	1.12441	2.31003	2.05272	7.51652	3.48608	7.46246	2.16814	2.39945	3.50746	7.16066	4.15685
Tanzanian	6.77607	4.9393	1.94114	2.14226	6.68483	7.25605	6.82718	8.50798	6.04429	1.8492	3.26361	4.74826	6.41539	10.2806	4.85942	4.5706	10.4789	2.07919	9.24682	5.52278	5.1894	6.25906	8.02791	5.97304	8.46257	6.97933	5.22752	9.23342	1.53622	8.69134	4.28621	1.52778	8.47307	7.53342	4.7715	0.508575	5.12242	4.43192	0.50025	1.54731	2.02946	6.99514	2.39986	7.17159	1.90719	2.06761	3.41094	6.28034	3.32122
Tanzanian	7.65606	5.45922	3.03467	2.98328	6.75262	8.63249	6.67342	9.58626	5.2886	1.86447	4.18424	5.7013	6.61139	10.8846	5.775	5.27759	8.65148	2.58693	9.43117	5.21722	5.16059	8.86178	8.72319	8.0758	10.3482	7.39785	6.8027	9.07995	3.11506	6.02597	4.81786	1.89209	8.82741	8.19505	5.47606	0.814135	5.40716	5.93225	0.85327	2.5084	1.95976	8.20341	4.04999	8.29988	2.94286	2.77328	3.56749	6.89928	3.53635
Tanzanian	8.47926	4.96692	3.2347	3.20456	6.70046	8.51389	6.71893	9.39652	6.07531	2.51234	4.3404	5.88861	7.32392	11.4111	5.931	5.99617	10.8875	1.97742	9.90961	5.51172	6.14294	9.06429	8.86614	8.29018	11.0091	8.29538	6.90142	9.56894	2.31357	7.84579	6.15257	2.297	9.19859	8.81302	6.56993	1.33125	6.22021	6.54884	1.33221	3.15324	2.29047	7.80066	4.13842	8.4492	3.24578	2.45955	4.00295	7.28759	4.05819
Tanzanian	8.73316	5.90437	3.70553	3.18216	6.40024	8.7273	6.42213	9.32484	5.36404	1.48912	4.48431	5.74017	7.21625	11.3641	5.40337	5.15038	10.6723	2.3435	9.91365	5.82117	5.52191	9.09408	8.76173	6.49963	8.73673	8.04425	6.61191	9.40679	2.72912	7.35475	5.32784	2.31128	8.16731	8.64979	5.86929	1.14288	6.20329	5.36376	0.95636	2.28371	2.34596	8.06272	4.23452	8.73592	3.00468	2.93852	3.81511	7.13758	3.92191
Tanzanian	8.81236	6.26377	2.41806	3.00466	7.39941	9.07811	7.13888	11.0425	6.90947	1.52984	4.35389	5.56309	7.15251	10.5437	5.52629	5.69536	10.7303	3.02794	9.86789	5.59859	5.77834	8.13149	8.93921	7.47654	9.36998	8.19773	7.15341	9.30864	1.16111	7.60048	7.06095	1.96225	8.40977	7.92193	4.42887	1.13716	5.70955	5.30574	1.17291	2.48371	2.01274	8.22215	4.67075	7.89935	2.08637	2.02629	3.85816	6.92743	4.13653
Tanzanian	10.3054	6.77949	2.72441	3.16358	7.22687	10.618	7.64313	10.2201	6.10447	2.59142	4.97612	6.29819	7.31132	11.2747	5.80008	5.93609	10.3467	3.05301	10.0633	5.50185	6.15308	10.956	9.33149	9.49935	12.5558	11.156	7.22724	9.09878	1.79834	8.41724	4.41015	2.38998	8.60623	8.63535	7.29469	1.19182	6.31517	5.72121	0.97925	2.34699	1.83387	8.11098	3.99639	8.41044	6.48743	3.69456	5.76354	8.02919	4.05329
Tanzanian	9.45327	5.70441	3.82139	3.42287	7.36477	8.92943	7.32094	9.57445	6.91373	2.34356	4.02952	5.92636	7.10691	11.1195	5.52033	6.04807	10.192	2.02759	9.72948	6.13395	5.62418	9.91954	8.11651	6.83163	10.0213	8.39293	6.30128	9.73111	2.28367	8.0617	7.62005	2.70499	8.93713	8.55451	5.09376	0.455935	5.8071	4.84553	1.15518	2.77463	2.44155	8.27023	3.60787	8.1668	2.36314	2.57266	4.2887	7.22309	4.09719
Tanzanian	10.46	5.79972	2.47314	2.89028	6.4279	8.36859	7.6951	10.7369	6.1253	3.72931	5.31301	6.47888	6.8892	11.0182	5.42818	5.31738	10.5557	3.14154	10.049	4.98173	5.86684	11.7432	9.10344	8.5449	12.5577	11.2893	6.62444	9.23198	1.41488	8.30612	6.71955	3.41222	8.8141	8.92099	7.72413	1.03171	5.98958	5.54922	1.03293	2.89284	1.76608	8.44216	3.3996	7.93353	3.76033	3.55977	6.02528	8.67441	4.1484
Tanzanian	9.05728	5.49139	4.50316	3.7458	6.91598	8.72482	9.04207	10.0331	6.0358	2.36409	4.26776	5.25661	7.29921	11.312	5.44602	5.57674	9.54542	3.51091	10.354	4.59117	6.16979	10.8844	8.61377	8.07408	12.6162	8.40348	6.75924	9.41579	1.8987	8.83675	4.6743	3.11726	9.14152	8.58979	5.80143	1.18203	5.93461	5.78367	1.30122	4.41849	1.73998	8.12186	3.90187	8.18367	4.08655	3.59757	4.11472	7.57684	4.02665
Tanzanian	8.16978	6.07437	0.94715	2.94111	8.48799	8.67469	9.56807	9.53678	7.78322	2.71379	4.72391	6.19393	7.90306	11.7089	5.7005	6.03784	11.8566	3.49336	10.168	6.42442	6.12636	9.66238	11.406	9.55972	5.01969	8.29518	9.41956	9.28338	1.53602	7.09997	5.17397	1.68066	9.18665	8.32499	8.62186	1.26097	6.49763	6.10743	1.47042	3.93595	2.23685	8.08985	6.28535	8.62092	3.12425	2.74749	4.73046	6.91336	4.12228
Tanzanian	6.96044	5.54375	1.64104	2.34022	6.23869	8.84661	6.02503	9.41338	5.77403	2.17293	6.42582	5.72502	6.68469	10.6646	5.06214	4.92518	10.0772	2.62339	9.69968	4.92073	6.08131	6.53017	8.41538	7.37447	7.36334	7.34347	6.12303	9.25069	2.31259	9.03931	4.28722	2.71346	8.34102	8.73941	6.76125	0.805275	5.90282	5.87969	1.18776	2.06896	1.36189	7.98374	4.31166	8.13129	3.45228	1.75952	3.57101	6.77308	3.57809
Tanzanian	9.18436	5.6742	3.86501	3.93256	7.30886	9.01342	10.7963	9.00999	6.24754	2.45347	4.06954	6.44137	6.59397	11.3545	5.51902	6.05929	10.1469	2.80845	9.86735	5.29244	6.03715	9.77357	8.66303	7.12118	10.9279	8.15807	8.40841	9.31615	2.89739	8.56777	6.10562	2.11701	8.45171	8.3742	9.7173	1.24909	5.71706	5.74942	1.07097	3.75989	2.39292	7.85637	3.83943	8.40201	3.43357	2.62548	5.15799	7.25469	4.0721
Tanzanian	9.39274	5.77304	2.5907	2.92032	6.66166	10.384	6.70292	9.55218	6.73764	3.2216	4.77834	5.53867	7.08996	11.3383	5.66322	5.62416	9.92733	3.59761	9.98546	5.25551	5.9136	8.40441	9.84966	8.20766	9.91736	7.92744	6.5042	9.57234	2.28819	8.57066	6.63304	2.62398	8.45478	8.63313	5.83269	0.864545	6.27123	5.14471	1.22188	1.69798	1.6479	8.51324	3.47313	8.56578	5.1258	2.19372	3.97004	7.2839	4.06702
Tanzanian	8.5417	6.39361	2.39059	2.01742	6.99311	8.45875	8.1391	9.88054	6.08239	2.03977	5.22304	7.74667	7.83303	11.4674	5.85876	6.38798	10.4364	2.64267	10.1394	5.82717	6.25278	8.01253	10.3066	8.73391	9.55561	7.22572	8.10557	9.65422	2.23859	7.63162	6.68645	2.41034	9.55602	8.23802	8.19122	0.757365	5.78123	5.68433	1.60805	2.59212	1.67691	8.21793	5.165	8.29062	3.67765	2.28375	3.79008	7.37737	4.32658
Tanzanian	9.03829	6.02154	2.54924	2.73472	6.44552	8.96358	5.94917	9.81559	5.71218	2.04434	4.66172	6.75877	6.72743	11.3125	5.88466	6.11902	9.99464	2.96319	9.89571	4.78572	5.74758	7.37329	11.2439	8.77889	9.49373	7.21106	6.10299	9.02668	2.79256	7.00124	4.58702	2.18995	8.98105	8.82253	5.05372	0.631365	5.92343	5.08155	0.97444	2.22631	1.42735	8.00385	3.57674	8.53923	3.62326	3.55221	3.68183	7.05553	4.04717
Tanzanian	8.20679	5.15337	2.59306	2.61948	6.61954	8.83047	7.66217	9.02309	6.16205	2.2346	4.11895	5.30079	6.66018	10.5988	5.00665	5.42323	10.602	2.69356	10.0502	4.99406	5.81337	8.61524	8.35326	6.11561	8.46298	7.31853	5.50995	9.32475	1.77852	9.57371	5.53051	6.10877	8.95749	8.49816	5.14661	0.750365	5.72957	4.48888	0.83344	1.52541	1.979	7.78477	3.42417	7.38033	3.11171	2.33923	3.21853	6.95899	3.88717
Tanzanian	7.04511	5.95732	1.83417	2.39738	7.0722	8.36853	7.04723	9.0229	6.02919	2.98169	4.24151	5.11322	6.98651	10.9535	5.41044	5.5031	10.8686	3.62599	9.57032	4.89183	4.8524	7.20113	8.85477	7.338	9.44768	6.95538	8.59528	9.07401	2.11965	7.04535	6.34338	2.3726	9.09121	8.38605	6.34418	0.852995	5.50725	6.00275	0.96113	1.75198	1.8515	8.1859	3.45676	9.24005	3.49408	2.19772	3.92093	6.54127	3.81545
Tanzanian	7.94531	6.11775	2.40958	2.60965	7.54236	9.13969	6.2496	9.39343	6.78876	2.40431	3.76577	5.87266	6.73475	10.9274	4.92948	5.60302	10.6015	3.11343	9.88621	5.49832	5.69289	7.84809	9.06417	7.96675	9.35051	7.16756	7.14635	9.55083	2.22417	8.87669	4.91136	1.88782	9.23728	8.21112	5.75932	0.933995	5.30201	4.86224	1.15864	2.36775	1.88807	8.22276	4.79791	8.55101	2.96581	2.33101	3.50639	7.07235	3.93057
Tanzanian	8.15803	5.87988	2.32786	2.83915	7.87959	10.0845	6.05663	10.1006	5.79809	2.21769	4.86376	5.81689	6.57726	11.2913	5.53084	5.31356	10.0186	4.2318	10.1653	5.74483	5.75006	8.14099	10.0165	8.23874	8.75211	7.74144	8.44792	9.32911	1.67002	9.08435	4.18699	2.02523	9.22443	8.33602	7.86458	0.887835	5.73466	5.95327	1.13296	2.10468	2.1703	8.46842	5.85544	10.292	2.89799	2.31172	4.26755	7.25539	4.01676
Tanzanian	8.60692	6.10041	3.71962	3.82788	7.31743	8.24476	6.65189	9.55641	5.68558	2.77447	5.98492	7.6483	7.29516	11.2582	5.53223	5.16659	9.55439	2.66703	10.06	5.16927	5.77815	11.5059	9.26799	10.5107	13.6388	12.1617	6.81766	9.60654	2.64438	8.92492	5.3713	2.73823	9.40226	9.01227	5.57378	0.994585	6.24815	5.7055	1.48712	3.0391	1.59608	7.80556	3.61592	7.94947	2.28715	3.39447	5.56254	8.99448	3.94143
Tanzanian	8.24939	5.40428	2.67555	3.08767	6.14398	8.25977	5.19534	9.18689	6.12699	1.58547	4.56998	5.9882	6.73649	10.619	4.42324	5.61522	9.94838	2.57069	9.50781	5.12827	4.95481	7.54183	8.65552	7.48188	8.33887	7.4398	6.17988	9.17669	3.60112	7.75624	6.00554	1.58061	8.74969	8.25041	6.35826	0.523145	5.76429	4.91406	0.87494	1.23571	1.03402	7.69717	2.99641	9.39396	2.44257	2.24383	3.34767	6.87812	3.51594
Tanzanian	7.97527	4.85262	2.0097	2.21929	6.63528	8.74283	6.76557	9.59661	4.86395	2.15668	4.4158	6.48984	6.66022	10.531	5.36154	5.63021	10.4844	2.04442	9.64449	4.23518	5.61183	7.61486	8.94898	8.14066	10.4168	7.40322	6.71755	8.77467	1.76161	7.71629	5.42977	1.99751	9.05167	8.06295	9.54062	0.916035	5.73979	6.42251	1.19661	2.80223	1.85852	7.99506	3.47634	7.23208	3.20202	2.20016	3.95452	7.28203	3.7391
Tanzanian	6.01694	4.75964	1.1062	1.74651	6.68728	8.64742	7.17088	9.05113	5.45108	1.98977	3.64819	5.26983	6.60542	10.7263	5.1307	5.01225	10.1389	2.3611	9.83852	5.60036	5.27639	6.67645	8.83994	5.95993	7.95697	6.28641	6.43447	9.27876	1.48303	8.12365	7.28965	5.57345	9.11983	7.92698	5.68492	1.27005	5.37908	4.60086	1.05275	3.35851	1.8653	8.00035	3.51117	7.11812	3.2367	1.7791	3.46558	6.70786	3.8555
Tanzanian	7.7675	5.47924	1.48467	2.22567	7.96543	8.79179	6.73889	9.67342	5.76143	2.70487	4.78719	5.86684	6.71923	10.95	5.82847	6.63324	10.8066	3.98394	9.8192	6.12258	5.29071	6.28463	9.28693	7.3527	9.20636	7.07974	7.26603	9.17739	1.73243	8.53762	6.93942	2.54813	9.04088	8.21654	6.85316	1.69093	5.87786	5.53454	0.96476	2.46262	1.75517	7.72846	5.80105	8.05312	2.90141	1.62354	4.45782	6.84675	4.15741
Tanzanian	8.76052	6.62674	4.57662	3.62776	6.21222	8.64538	6.45963	8.92113	5.16486	1.96141	3.87961	4.9917	7.23933	11.1873	4.92972	4.9447	7.89267	2.05884	9.60651	5.54512	6.0308	10.1608	8.10313	8.38055	12.3713	9.00088	5.2184	9.09973	2.19759	7.78247	5.65446	2.05437	8.98016	8.03518	4.52809	1.11146	6.14192	4.74692	1.12287	2.034	1.74257	7.76502	2.60939	7.98144	2.37149	3.00359	3.80983	7.41829	3.67758
Tanzanian	8.90161	5.94998	3.17951	3.23701	6.88064	9.37863	9.23405	9.89926	6.54434	2.45542	5.93013	7.70289	7.00357	11.3045	5.30807	5.12164	10.8635	3.20004	10.5316	5.88588	6.65031	10.1732	11.9366	8.34842	10.7525	8.92962	10.0633	9.42441	2.03111	9.13114	4.26461	5.02527	9.97599	9.01325	13.3831	1.08685	6.03259	5.70725	1.47619	4.36724	2.24161	8.28578	5.29685	7.90935	5.03224	3.23616	5.74066	7.4459	4.28512
Tanzanian	9.2902	6.03587	5.27971	4.2044	7.76808	9.11341	6.85007	9.31305	6.74313	2.60596	12.2941	7.60813	6.97099	11.7263	5.44732	6.04284	8.07893	3.88795	9.86022	5.50762	5.71804	11.1603	9.12064	7.00566	13.2636	10.1342	6.44679	9.70273	2.34991	7.42248	6.96288	2.75054	9.30011	8.82858	5.73387	0.805595	5.98743	5.07962	1.231	4.69436	2.09565	8.92506	4.26917	8.63621	3.84443	4.12933	4.73651	7.77888	3.75688
Tanzanian	10.1307	6.38286	5.0333	4.81288	7.79611	8.79705	7.04471	9.78861	6.66683	2.67142	5.74322	6.00579	7.60836	12.014	6.00333	6.35095	10.0287	3.67944	10.0844	6.03349	6.66541	11.3451	9.46455	9.23815	11.8929	10.6458	7.68147	9.45521	2.19054	7.93787	6.61917	2.6359	9.0554	8.66687	6.01464	1.05265	6.26039	5.42645	1.29023	3.11476	2.27229	8.46233	3.73115	9.04035	3.3767	4.26657	4.78238	7.75645	4.26349
Tanzanian	8.18956	5.77306	1.19258	2.24883	8.29557	10.0227	7.29504	9.09338	6.76605	2.55097	4.60215	6.3453	7.34601	10.7755	5.34447	5.61093	10.2885	3.81574	9.931	5.81761	5.66565	8.48575	8.8245	6.98942	11.9749	7.60463	6.98477	9.46914	1.837	7.98292	7.93969	5.42837	8.56959	8.7209	5.65852	1.19056	5.62674	5.5967	0.99859	2.02679	1.86452	8.57201	3.78328	7.90829	3.01384	4.756	6.0116	7.37638	4.11052
Tanzanian	9.05504	5.46762	1.47628	2.77167	6.63881	8.3642	6.71753	10.1679	5.08474	2.17516	11.7905	6.95671	6.62649	10.9686	5.47414	4.7436	10.5419	3.28797	10.1088	5.2396	5.91502	8.99104	8.62812	6.21413	12.2102	9.50693	6.02604	8.82891	2.37773	8.48505	5.96898	1.82167	8.99724	8.52123	5.266	3.09251	5.87704	5.70176	1.12866	4.00812	1.30828	7.71588	3.51369	8.23983	4.4204	3.00845	5.05787	7.58613	3.53275
Tanzanian	8.00433	5.98698	1.61689	2.69735	7.15029	8.77446	6.89133	8.70416	6.54784	1.98935	3.86918	5.20782	6.82622	11.002	5.6321	5.68654	10.1846	3.005	9.67355	5.45743	5.8469	7.5895	8.07247	5.94493	8.46618	7.00129	6.35801	9.24342	1.70423	9.54627	7.24839	2.38881	8.59971	8.21736	6.94105	1.03971	5.9843	5.6082	1.05214	2.18009	2.1984	7.7608	2.99187	6.95899	7.35602	1.84142	3.64946	7.06579	4.12855
Tanzanian	7.45259	5.31719	1.65045	2.42664	6.87015	8.69538	6.91713	10.8089	5.99495	1.74735	4.50307	5.54197	6.96579	11.0179	5.40359	5.52677	11.1572	2.61424	10.1056	5.60596	5.26602	7.85515	8.93236	8.75097	10.8088	7.85473	6.53003	9.24839	1.95945	8.08243	5.96118	2.46454	9.24986	8.48507	6.22207	0.884855	5.97368	5.60168	1.10815	1.68196	2.49144	8.61461	3.47742	8.21809	4.24205	2.22989	3.21464	7.14454	3.99341
Tanzanian	7.5948	5.4672	1.48542	2.01307	6.99692	9.30723	6.84956	10.1999	6.02674	1.9305	4.42493	5.73787	7.15149	11.4064	5.62663	5.99651	10.9458	3.49554	10.0665	5.5711	6.23854	7.21136	9.54284	7.86678	10.2278	7.63889	7.29312	9.18076	1.87356	9.73382	5.75421	2.18785	9.27483	8.58702	6.69953	0.803935	5.9664	6.13373	1.30382	1.87384	1.59787	8.82904	3.80071	7.96361	3.90335	2.39647	3.50646	7.12896	4.05346
Tanzanian	6.88476	5.15256	0.87614	1.85786	6.26123	8.10322	6.06193	9.14561	5.95481	1.79749	4.08364	5.22849	6.702	10.6264	5.83093	5.95258	11.8187	2.66479	9.69893	5.19912	5.49395	6.32942	8.17216	7.36584	7.93218	6.71072	8.00496	8.84845	1.36949	7.88126	5.11111	2.12957	8.22228	7.75895	5.95201	1.08119	5.29347	5.7366	1.20748	1.72361	1.24998	7.65565	5.44318	7.0252	2.83507	2.10026	2.79518	6.83448	3.42385
Tanzanian	8.62611	5.66115	3.20846	2.9336	7.38654	7.74782	6.25306	9.62458	6.45834	2.65568	4.0979	6.21439	6.99001	11.2884	5.1165	5.16711	9.9141	3.40645	9.95844	6.00046	6.2712	9.51062	8.35517	7.21028	11.3902	8.42879	6.49557	9.69409	1.07018	8.06399	6.03902	1.85204	9.61726	8.3352	5.81783	0.781915	5.84204	5.16517	1.10297	1.7953	1.53004	8.21595	3.02601	8.31625	2.92651	2.77653	3.96443	7.58758	4.01488
Tanzanian	8.54969	5.26907	3.32664	3.21548	7.12632	8.60545	6.51987	8.96524	6.75099	1.62194	4.20828	5.44817	6.9649	10.8298	5.55647	4.91352	8.75854	3.18145	9.54262	5.45405	5.17156	9.12964	8.23764	8.0456	10.5158	7.8667	7.38704	9.21424	1.54025	10.3519	6.24571	1.83601	8.86574	7.74329	6.08912	5.54962	5.79643	4.74561	1.06736	2.21808	1.85028	8.04019	4.48512	8.35026	2.31894	2.72454	3.38369	6.8152	3.64568
Tanzanian	8.54257	5.78773	4.17654	3.54307	6.57096	8.92521	6.36212	9.45668	5.50776	1.95345	4.85492	7.45186	7.7466	11.5753	5.43721	5.90086	10.4225	4.19072	9.83507	6.18758	5.32051	9.62233	8.62639	6.31475	11.1563	9.34488	5.88382	9.62584	1.21117	8.32026	6.05168	1.84987	8.658	8.3374	4.77145	0.517465	5.53725	4.89597	1.01397	1.97278	1.49701	7.70898	4.62155	8.52502	2.39283	2.99932	4.30059	7.42929	3.77172
Tanzanian	7.63539	5.43614	1.71956	2.68945	6.97172	8.20008	6.25439	9.93056	6.23233	2.06085	4.79451	5.51232	6.87009	10.7278	4.88292	4.6699	9.55587	3.25563	9.70176	4.86665	5.86166	9.2266	9.12006	7.46427	11.1739	7.15269	6.5133	8.93606	2.49085	6.73719	6.94721	2.04128	9.20979	8.43927	5.44565	1.11576	5.88793	4.45465	0.97833	1.59888	1.5438	7.94688	3.33666	7.79817	3.81319	2.48342	3.36537	6.93806	3.84137
Tanzanian	7.35771	5.84711	1.14203	2.09863	7.78738	9.80299	7.10978	9.79232	6.39736	2.25509	4.71326	6.71234	7.54136	11.498	5.5387	5.88298	9.07973	3.84793	10.401	6.02401	6.63023	6.41413	9.49941	7.99608	8.97564	7.37383	7.95683	9.79264	0.980545	8.17552	7.0284	3.33671	9.32573	8.83276	6.70646	1.56951	5.95993	6.16343	1.38767	2.92377	1.88881	8.70787	3.89607	8.1173	4.168	1.98561	4.62725	7.70453	4.15986
Tanzanian	11.1754	6.30748	2.84198	3.53647	7.21742	8.37993	7.29788	10.661	6.28862	2.14342	4.78787	6.07393	7.24085	10.9549	5.42515	5.74538	10.6539	3.549	9.74553	5.13112	5.42703	7.2172	8.45568	8.31614	8.94976	7.44989	6.42619	9.27544	2.76349	9.2863	6.8647	3.05356	8.02088	8.65754	5.86241	1.58783	5.74622	5.00596	1.02093	2.23104	1.56529	7.66227	3.99299	8.34995	2.63909	2.41769	3.75676	7.3225	4.00153
Tanzanian	7.00749	5.61698	2.08059	2.20201	6.74133	8.41429	6.15989	8.88958	5.53573	2.12809	3.96184	4.78313	6.4203	10.7912	5.14537	5.27611	8.68901	2.87724	10.0245	4.72042	6.02345	9.72188	8.65399	7.22266	9.34397	6.41493	5.91413	8.97966	2.02818	8.05354	5.88474	4.90487	9.11654	8.24354	5.37024	1.02727	5.60372	5.01569	0.99291	1.59292	1.6438	8.05949	3.08345	7.08267	3.54775	2.72955	3.55871	6.95669	3.69168
Tanzanian	8.57945	5.76821	2.19261	2.90293	7.33703	8.48805	6.17626	9.89785	6.02766	2.46808	6.89572	5.81041	6.65834	10.6078	5.40449	5.61843	9.109	2.69314	9.9832	5.40875	5.91891	7.1894	9.41104	7.7704	8.36459	7.51295	7.24399	8.8823	2.51152	7.86332	5.13957	2.66968	8.52931	8.33198	8.16196	2.77956	5.61522	5.80511	0.91464	1.95387	1.51266	7.97426	3.63743	7.54889	3.08758	1.80141	3.83424	6.8986	4.04924
Tanzanian	8.82574	5.34696	2.57996	3.02355	6.68174	9.09006	7.05477	9.7373	5.86167	1.91199	5.08927	6.96556	6.93809	11.3416	5.213	5.78618	10.041	3.10136	10.0033	5.00901	5.07161	9.88531	9.19846	9.23475	13.4816	10.8546	6.57791	9.18894	2.29088	7.98872	7.05543	2.16748	9.6821	9.09887	5.40018	0.943915	5.78688	5.14884	1.20928	1.5057	2.10779	8.7262	3.69109	8.64842	4.62329	3.85941	5.94106	8.11965	3.94976
Tanzanian	7.90278	6.12927	2.84163	2.63757	6.44557	8.54799	6.11664	8.84018	6.00286	2.45372	7.76832	6.16864	6.92762	11.2197	5.30831	5.35726	11.5697	2.94997	10.1269	5.46135	5.96855	8.44548	9.34865	7.70248	10.1496	7.50047	6.53611	9.17997	1.84007	7.43013	5.53507	1.89377	9.0634	8.16308	5.97662	3.31697	6.06466	5.7942	1.03025	3.29382	2.12462	8.20052	3.54483	8.38824	3.60507	4.4862	3.74177	6.98527	4.00638
Tanzanian	10.4761	6.36566	2.49022	2.93177	6.87698	9.14029	6.52252	9.93812	6.20951	2.67291	4.30581	5.54601	7.05514	10.9009	5.32077	6.05401	10.1298	3.74562	9.94647	5.71355	5.65141	11.1508	8.91916	8.4203	10.9356	8.33695	6.70048	9.31746	3.22383	8.25277	6.61321	2.18616	9.33445	8.82439	6.20885	0.717385	6.14363	6.01962	1.20388	1.32564	1.59522	8.39725	3.43268	8.44988	3.82828	2.70571	3.28569	7.65921	4.20069
Tanzanian	8.51802	5.89769	1.80005	2.67455	7.32758	8.11612	7.15071	9.47179	5.77419	1.93319	3.35743	5.43978	6.96312	10.8858	5.6878	6.02297	9.47458	2.69189	9.82309	5.14399	5.92881	8.03718	7.78533	8.23583	11.2756	7.1723	6.15496	9.53962	2.09212	6.9509	6.30527	2.25123	8.73138	8.87019	5.52482	0.716965	5.78871	5.20923	1.15859	2.59516	1.78812	7.78926	2.98101	8.86138	3.31473	2.62597	3.55079	6.61552	4.27018
Tanzanian	8.71637	5.94954	2.37458	2.58944	6.42015	9.36084	7.92651	10.2892	6.81811	2.72723	5.26389	6.06083	7.19517	11.06	5.61175	5.54648	10.8751	4.42368	10.3346	5.88711	6.13648	8.0029	9.3296	7.41494	10.3677	7.51225	6.74892	9.3627	2.92834	9.19126	6.97689	3.54272	9.65578	8.75829	6.30483	1.39336	6.10649	6.24198	1.45083	2.43283	2.34933	8.8208	4.25716	8.44941	4.51924	2.96146	4.37973	7.30783	4.36642
Tanzanian	8.62274	6.59622	1.81904	2.63164	7.39594	9.06353	7.2902	9.262	6.10776	2.24663	3.9951	5.99664	7.19612	11.0624	5.95003	6.04908	10.3629	3.24012	9.86714	6.73969	5.97238	8.19177	8.96333	7.34423	10.8704	7.76474	6.96805	9.43531	2.1915	8.08785	7.47212	2.73034	8.97641	8.3112	6.25846	1.10075	6.2202	5.08932	1.33646	2.44864	1.91369	8.39475	3.47683	8.36371	2.72646	1.91053	3.96938	6.88009	4.12125
Tanzanian	9.24605	6.83634	3.99831	3.78354	7.26165	8.13235	5.81552	9.60498	5.54699	2.71896	4.63082	6.42317	7.24333	11.3172	4.94327	4.90649	10.5809	2.47101	9.99704	5.75474	5.99491	9.88637	9.56512	9.2144	11.3252	9.0013	6.70181	9.25998	1.88428	7.75331	7.45875	2.09748	8.8115	8.55713	6.45539	1.63918	5.75244	5.66193	1.25664	3.48884	1.62854	8.27667	4.09488	8.38892	3.01119	2.89595	4.72706	7.1951	3.78639
Tanzanian	8.18784	6.24864	2.40501	2.65069	7.22797	9.16909	6.93539	9.88562	6.96486	2.22711	10.356	6.94566	6.97488	11.5289	5.43806	6.22825	10.668	3.74546	10.124	4.52693	6.11748	8.67989	10.4562	9.04223	12.451	9.48023	8.39014	9.32439	2.88206	6.2885	5.40524	2.02968	9.55377	8.90914	7.97889	1.1052	5.33755	5.94871	1.39702	1.84311	1.78557	7.92428	3.08299	9.83405	3.84173	2.68001	4.97126	7.5485	3.87833
Tanzanian	7.70224	5.45519	1.26514	2.37507	7.2684	7.93436	6.49198	10.5669	6.70139	2.59511	3.92028	5.09328	6.49595	10.9089	5.40663	5.19534	9.37616	3.29645	9.57712	5.34104	5.58503	7.7702	8.30228	6.52625	10.0207	7.31013	6.85006	9.14738	1.9076	8.55871	4.49727	2.01799	8.73053	7.70189	5.83447	1.79347	5.61184	5.01229	1.04292	2.46135	2.46579	7.88673	3.58575	7.87469	2.91328	2.04452	3.59215	6.66378	3.77451
Tanzanian	8.6565	5.51272	2.2738	2.90194	6.34588	8.42061	6.64187	9.76681	5.36271	2.3552	4.79268	6.37158	7.09532	11.0942	5.14034	5.0727	9.80452	3.11052	10.0103	4.98112	5.4772	8.26642	8.72036	6.40802	8.18397	6.89119	7.01497	9.14225	2.83377	6.77043	5.23467	2.26471	9.1967	8.10599	6.92967	1.14325	5.82268	6.06783	1.11827	3.06085	2.49832	8.35261	3.44322	6.84192	3.36958	2.47827	3.66911	6.97692	3.85167
Tanzanian	8.58784	5.47733	2.39577	2.62908	7.53917	9.13541	9.33509	10.7518	6.06186	2.24827	4.70716	6.39694	7.45333	11.1028	5.34326	5.76893	10.6095	3.7176	10.2676	6.01214	6.15381	7.59987	9.52813	7.32261	7.98665	7.63905	7.24808	9.62255	2.29563	9.85206	6.31097	2.10279	9.36462	8.58922	6.82376	0.928655	6.018	5.69104	1.41039	2.13648	1.78351	8.66522	4.18916	8.90367	3.70113	2.6282	3.82491	7.29178	4.39331
Tanzanian	8.18603	5.79129	2.07505	2.90265	6.87678	8.19032	6.73213	9.82681	6.05462	1.97411	4.75364	6.30147	6.91733	10.5517	6.08357	5.73574	10.3622	3.1422	9.82846	4.92056	5.72053	8.87115	8.39195	8.627	11.775	9.42461	5.72314	9.39241	2.27372	9.3206	6.01975	2.06479	8.70472	8.74328	5.67719	1.26852	6.32156	5.60414	1.33343	2.46261	1.60363	8.44068	3.14011	8.1237	2.12453	2.5457	5.15289	7.33401	4.26942
Tanzanian	8.58638	6.30415	1.79097	2.74774	7.53815	9.92553	7.73785	10.1959	5.66925	1.72039	4.89924	6.48548	7.4009	11.1589	5.72308	6.00547	10.8463	4.24625	10.0682	5.68449	5.54469	8.29714	9.47877	7.24945	10.242	8.82836	7.43208	9.41088	2.22411	7.31407	6.31643	1.63119	8.84286	8.50641	6.52115	1.72293	5.9211	6.08866	1.25772	2.48144	1.33923	8.28427	5.84401	9.0274	3.77562	2.12421	5.02555	7.29777	3.98033
Tanzanian	8.75554	6.39614	1.95068	2.65135	6.78606	8.71664	6.24494	9.75488	6.23593	1.84938	4.17138	6.44872	7.23026	11.0291	5.47679	5.48609	10.4425	2.4695	10.0069	5.8119	6.10978	8.66859	8.83206	7.15537	11.2048	8.78314	6.58111	10.0384	3.81011	8.3179	7.80536	1.765	8.75479	8.79991	5.69173	0.702465	6.13481	5.15074	1.46706	1.86673	1.8433	7.9437	3.53673	8.79858	2.49606	2.37769	4.05463	7.34966	4.11229
Tanzanian	8.06025	5.89218	2.17584	2.54561	6.56543	9.87726	8.85684	8.83712	6.13366	1.61708	4.64673	6.05645	7.53188	11.025	5.48532	6.06656	10.3291	3.30876	9.83742	5.24707	5.7926	7.56154	11.2187	7.98826	8.60815	6.92476	9.8847	9.19521	2.05961	9.33313	7.74585	2.09583	8.71834	8.29693	11.6744	0.515105	5.98355	4.96504	1.05617	2.4502	1.56286	7.70637	5.90454	8.30911	3.02793	1.97277	4.34225	6.5698	3.87227
Tanzanian	8.11454	4.21049	2.14003	2.78159	6.75001	9.05739	7.51798	9.63127	6.2035	2.51862	3.99232	5.81958	7.05712	11.2218	5.90348	5.99486	10.0329	2.76708	9.97329	4.29942	6.01407	6.55645	8.34501	6.70797	7.19939	7.26581	5.85184	9.5934	3.12123	8.50684	6.8682	2.98902	9.31043	8.3132	5.5518	0.971045	6.11906	5.0011	1.10448	2.68211	1.95608	7.74927	3.73109	8.27763	4.13739	3.28509	3.40043	7.02555	3.90359
Tanzanian	7.69791	5.4429	1.92867	2.14483	7.02807	8.98001	6.8349	9.11818	6.34856	2.15104	3.91783	5.13148	6.87579	10.8913	4.47934	5.00903	10.561	2.49684	9.97518	5.49155	6.25261	8.7743	10.1332	7.81591	10.4199	7.83408	7.09065	9.4412	1.29801	9.5866	8.38658	1.98039	9.08835	8.07288	8.40061	0.692365	5.8068	4.58795	0.76885	2.47172	1.70026	8.11701	4.01164	7.72776	2.82317	2.11476	4.03625	6.87542	4.27646
Tanzanian	8.9938	6.5686	3.69239	3.30113	6.52342	8.43328	5.79765	9.93098	6.1136	2.09287	4.6834	5.82139	7.71413	11.4614	5.6428	5.83298	11.023	3.10765	9.95816	5.43405	5.84657	9.60669	8.58344	9.03817	11.4356	8.69965	6.82442	9.18659	2.64089	8.41399	5.51649	1.7871	9.11938	8.38876	6.38068	0.782855	5.98524	5.61883	0.94369	1.53845	1.77155	7.6916	3.62432	8.32306	3.39797	2.81494	4.50242	7.41716	3.95577
Tanzanian	8.20001	5.73998	2.76665	2.43702	6.91635	9.36481	6.87161	9.64559	6.03045	1.92032	3.86424	6.13896	7.56425	11.2571	5.79658	6.01309	10.2032	3.28453	9.96394	5.90419	6.22286	8.5067	9.08166	8.38131	10.5964	7.68276	6.52351	9.35327	1.8038	8.468	6.47805	2.53761	9.19621	8.26938	6.43253	2.12044	6.21126	4.99871	1.33335	1.95459	1.48318	7.82722	3.87492	7.22135	2.8881	2.38448	3.46262	7.24238	4.1551
Tanzanian	8.09966	6.04021	2.69067	2.53727	7.18246	9.21137	5.86001	9.4533	5.69236	2.30319	4.10517	5.8476	7.08824	10.6493	5.50231	5.19004	10.6588	2.84287	9.88743	5.07009	6.03616	8.45904	8.2948	7.85225	10.1191	8.12237	6.52165	9.00489	1.29451	8.55036	4.20554	1.99697	8.89374	7.90146	6.13929	1.16057	5.84703	5.60388	1.05181	1.84252	1.0749	7.84737	4.81133	8.02014	2.36611	2.35638	4.05285	6.97595	4.0513
Tanzanian	8.9892	6.11388	4.72058	4.38005	6.50258	8.33569	8.06983	9.26813	5.42999	1.88797	5.65843	6.57965	7.0482	11.3166	5.48437	5.49833	9.73174	2.80534	9.93444	5.26565	5.17337	11.6507	9.52813	8.33397	12.6149	10.0997	5.71718	8.92197	2.79698	8.64566	7.24793	2.63586	8.72025	8.87633	5.16053	4.56924	5.4265	6.09324	0.78746	2.33714	3.33812	7.73126	3.88609	7.933	4.16293	3.49726	4.74426	7.56775	3.68568
Tanzanian	9.20135	6.70418	3.45335	3.30653	7.10339	8.63448	7.13854	9.20504	6.33594	2.60569	4.42002	5.53202	7.16605	11.1208	5.69176	5.47783	10.7274	3.14592	10.048	6.06274	5.89117	9.88837	9.08069	8.46274	12.4129	8.49667	6.5477	9.22487	2.7133	7.71779	6.36616	2.29675	9.51638	8.84427	5.8319	1.1001	6.26086	5.48846	1.52117	3.68867	2.66002	8.43059	3.61926	8.31896	3.36411	2.97107	4.42844	7.59065	4.17218
Tanzanian	8.49836	6.1932	3.81695	3.06948	6.80882	8.36669	5.90317	9.70691	5.74298	1.96483	4.14909	5.97365	7.03986	11.3483	5.53993	5.88457	11.4142	1.72964	9.67429	4.77312	5.7722	8.10455	8.07874	8.06298	9.70572	7.49453	6.01987	9.01939	2.01595	8.13715	4.7045	2.34215	8.79781	8.1386	5.09984	1.04686	5.65461	5.42563	0.88091	2.38352	1.71969	7.60378	3.02956	8.17652	2.33797	2.68589	3.44546	7.96877	3.775
Tanzanian	10.7103	6.13105	3.58868	3.99412	6.95825	8.79021	6.51718	9.4373	6.31227	2.09001	4.25936	5.57081	7.24514	10.5639	4.9246	5.2916	9.61033	2.50522	9.87665	5.71036	6.02904	9.33691	8.34722	9.01097	12.6126	9.1699	6.30391	9.23954	2.57285	8.61107	7.08107	1.87797	8.83502	8.29078	5.81498	1.06428	5.86184	5.28045	1.18125	2.27017	1.75738	8.48382	3.67724	7.5171	4.91061	2.68115	5.08804	7.7134	4.33773
Tanzanian	8.65833	6.35482	1.05655	2.38338	6.47065	8.22532	7.58009	9.40437	6.258	2.32483	3.61712	5.68051	7.03158	10.522	5.46871	5.12272	10.2141	5.11282	9.8306	6.14496	6.2856	6.47436	8.93716	8.07214	6.34624	6.70953	6.67509	9.37623	2.00784	10.4156	7.00437	1.98134	8.78077	7.92033	7.08149	1.47647	5.84079	5.1935	1.11114	1.91997	1.45924	7.72323	3.70249	8.14812	2.70027	2.11797	3.06399	7.21246	4.24491
Tanzanian	7.5561	5.75035	1.4514	2.0253	6.30255	9.51697	7.31596	9.49413	6.14602	2.12084	3.63449	5.17973	7.02199	11.2117	5.53362	5.64464	10.0383	2.20995	9.72845	7.03762	6.20694	6.57224	8.69895	6.07664	7.59556	6.11156	6.69621	9.6828	3.19009	8.71857	5.24029	2.05842	9.02509	8.12063	5.30989	2.44984	6.17403	6.04514	1.20551	2.66663	2.03936	7.58312	3.44328	8.17225	2.19591	1.93096	3.42638	7.1132	4.22256
Tanzanian	10.38	5.34265	1.65569	2.8218	6.85477	8.6013	5.71233	8.68322	5.11954	2.32039	3.98232	5.64346	6.62471	10.6951	5.27788	4.99641	9.27024	2.56051	9.86399	5.67919	5.52392	9.24102	9.00335	8.4885	8.89151	7.04756	6.39755	9.13704	2.93968	7.55173	6.12714	2.39759	8.97895	8.44672	8.12825	1.94691	5.99875	5.41781	0.84576	2.05519	1.34369	7.78811	3.81921	7.64241	2.9771	2.18184	3.19118	7.39417	4.01525
Tanzanian	8.18944	5.43729	3.53235	2.79083	7.1715	7.77581	6.76473	8.99417	6.74437	2.90692	4.32048	5.66411	7.08283	11.47	5.18185	5.98595	9.4619	2.91133	9.63073	5.28564	5.68208	8.97931	9.02464	6.93875	10.4237	8.00319	7.62357	9.24182	1.63306	10.1689	8.55352	2.88872	9.58213	8.21612	6.59769	0.789445	5.31754	4.75401	1.00185	2.42573	1.74074	7.69959	3.63956	7.9702	3.15318	2.54032	4.86202	7.47417	3.93525
Tanzanian	9.25145	5.30955	1.93079	3.09545	6.82955	9.20377	7.37814	9.3452	5.68143	2.4571	9.57423	6.07575	6.99573	11.2476	5.69047	5.42288	10.8123	4.144	10.0287	5.59621	5.73342	8.32502	9.12306	9.08856	12.348	8.60282	6.98552	9.29461	1.89993	7.46652	5.31206	2.1004	9.24742	8.80918	7.98852	0.853835	6.0397	6.19261	1.21141	2.97921	2.90896	8.32964	3.6904	7.8445	3.25852	2.38258	4.89018	7.46293	4.07254
Tanzanian	7.02091	5.66214	1.02354	1.7659	6.47885	8.57096	7.53951	9.01423	5.54925	2.25088	3.92895	5.7584	7.16037	10.4537	5.194	5.21396	9.82714	2.12243	9.77037	4.41345	5.60052	6.4855	9.73588	7.88682	8.47538	6.56613	6.80579	9.3475	1.56119	7.79296	7.40504	3.39344	9.25616	8.26183	7.04519	0.702335	5.55145	5.15238	0.96649	2.6212	1.94141	8.00652	3.85491	7.99024	3.27344	2.18913	3.22385	6.92065	4.1417
Tanzanian	8.68121	5.79331	1.23863	2.46618	6.77046	8.59619	5.69078	9.59886	6.07512	1.6361	4.36461	6.17021	6.87133	11.1396	5.19944	5.92223	10.2349	3.33865	9.68365	5.741	5.68977	10.2222	8.14454	6.33661	8.26694	7.61608	6.5255	9.54511	3.00191	8.39161	6.28663	2.04158	8.27271	8.33518	6.44193	0.961255	5.85686	5.48388	0.86865	1.98526	1.58925	7.82598	4.17012	7.74456	1.99823	2.40336	3.17636	7.22977	3.88833
Tanzanian	7.22311	5.66704	0.66037	1.94003	6.40344	8.41521	6.29665	9.48997	5.74029	2.27825	4.21134	5.28169	7.01947	10.8185	5.60628	5.38525	9.88482	2.27449	9.71415	4.76035	5.72174	6.29605	8.56767	6.04576	10.1749	6.40013	6.20946	9.36896	1.94893	8.50348	5.63817	1.67156	8.71632	7.82297	5.89776	0.901685	5.57346	5.25636	1.0039	1.80512	1.27897	8.02838	3.68588	8.41377	2.52736	2.19908	3.02017	6.94503	4.06902
Tanzanian	8.62103	5.59065	1.66237	2.4784	6.57296	9.01702	6.49034	10.5031	6.0267	2.55748	4.6273	6.37481	7.53829	11.4412	5.43406	5.46511	11.02	2.91567	10.298	6.37478	6.32245	7.79354	8.79024	7.34438	9.08254	6.89466	6.99939	9.46176	2.36759	9.12434	4.93778	2.20859	9.62069	8.32116	6.31296	4.11759	6.56958	6.06098	1.12044	2.16169	1.63356	8.37379	4.00666	8.12026	3.37229	2.25212	3.81325	7.3471	3.89435
Tanzanian	6.69742	5.08728	0.51364	2.09588	6.49793	7.70979	5.05568	9.58206	6.09192	1.70413	3.61294	5.22837	6.35477	10.2749	4.69313	4.80957	9.11909	2.17564	9.55026	4.89798	4.78133	5.95465	7.95684	6.01886	8.31582	6.65022	5.54253	8.86719	2.18022	6.41186	5.5905	1.73263	8.70673	8.34832	4.92191	0.870575	5.21422	3.8957	0.73276	1.55852	2.28674	7.75641	2.60118	7.32005	3.18704	1.92974	2.55071	6.44562	3.48125
Tanzanian	8.40367	5.88281	1.37383	2.48073	7.43597	8.6817	7.52276	10.3751	6.39178	2.38115	4.54838	6.26731	7.51969	10.6375	5.56016	5.89741	12.5279	3.5686	10.2302	5.14347	6.20457	6.28653	8.46877	6.04993	6.63035	7.57852	6.94128	9.84387	2.82247	9.59422	5.52784	1.77912	8.54553	9.08207	5.66954	0.726185	6.14494	4.96028	1.41739	2.59838	1.41633	8.28511	3.62486	8.9916	2.8159	2.41459	4.43063	7.12425	4.06799
Tanzanian	7.91732	5.33993	1.13928	3.09208	6.37713	8.5054	6.78405	9.31843	6.43419	1.81776	4.18272	6.61597	7.12789	10.5253	5.31689	5.35152	11.0175	2.99478	9.95706	5.00435	5.39795	6.23379	9.0215	6.42712	7.4996	7.84323	6.39722	9.24557	3.83255	9.38889	6.61186	1.81028	8.95703	8.48496	6.09919	0.836165	5.94268	5.48282	0.91257	1.74206	1.99002	8.29108	4.04476	9.58382	4.08336	3.03994	3.34037	6.78371	4.07201
Tanzanian	8.20866	5.45115	2.85303	2.862	6.57459	8.95684	6.77454	10.153	6.13924	2.21693	4.08964	5.43628	7.45907	11.1791	5.49221	6.16983	7.78955	3.49303	9.96787	5.23578	5.56089	7.77055	8.74007	7.34347	9.63757	7.32646	7.51398	9.73766	2.14986	7.52876	6.17104	2.03428	8.44379	8.18196	7.67551	0.907495	5.74634	5.20055	1.2934	3.01863	1.72653	8.32586	3.86113	7.81918	3.11639	2.67091	3.21859	7.07109	3.91021
Tanzanian	9.2226	6.54999	2.40209	3.20625	8.07039	9.59065	8.42961	9.78955	7.29059	2.33162	4.58493	6.38882	7.55462	11.2539	5.92515	5.96708	10.9908	3.79372	10.5661	5.83641	6.61334	12.1176	9.90021	8.31103	9.33643	8.04367	8.08146	9.56571	3.41328	8.42389	9.32029	2.38909	10.0084	9.19464	6.52221	0.743035	6.44489	5.67314	1.74023	2.54058	2.72484	8.40509	5.18753	9.18993	3.70942	2.65455	3.95095	7.69004	4.30968
Tanzanian	8.78856	5.95059	3.04783	2.75607	6.79549	9.0829	7.44389	10.4492	6.06419	2.0369	4.1795	6.35536	7.42156	11.2639	5.14759	5.56292	10.5245	2.89283	9.90566	6.80373	5.68369	7.80314	8.72271	7.80209	10.4871	8.40973	6.39952	9.67169	2.5528	7.76637	7.04128	1.8573	9.35215	8.41101	6.4316	1.15963	5.89177	6.12852	1.0925	2.28049	1.78609	8.69777	4.13162	7.55985	2.97439	2.42336	3.43797	7.16568	4.40865
Tanzanian	8.09886	5.65447	1.75006	2.45223	6.60996	8.09819	8.67176	9.42408	6.10907	1.91082	3.91874	5.31069	7.34897	11.1986	5.49438	5.20259	9.28716	2.19661	9.88133	5.46791	6.40657	7.492	8.57901	6.1544	11.3401	7.40018	6.50823	9.24837	1.96985	8.05889	4.68615	2.38621	9.32889	8.20154	5.81946	0.972385	5.98388	5.25938	1.07579	1.82722	1.74958	8.17393	3.44661	8.35478	2.60526	3.50315	3.82151	7.14318	3.93506
Tanzanian	8.97189	5.88478	3.04869	3.45373	7.11305	8.91357	8.47949	9.71524	6.24723	1.96477	4.48226	6.20254	7.35681	11.1572	5.24044	5.57899	11.4288	2.67414	9.84099	5.42542	5.65347	9.46988	8.88024	8.33538	0.926555	11.6051	7.58263	9.28227	2.55274	7.09373	5.11091	2.84958	9.39038	8.37317	5.64738	0.643435	6.24226	5.22028	0.86178	3.95214	1.83895	8.76033	3.78487	8.13612	2.30062	2.61195	4.20073	7.05987	4.03002
Tanzanian	7.81165	5.65778	2.13847	2.63085	6.09672	8.17056	6.42609	9.84428	5.3395	1.65916	3.64214	5.04882	7.20961	10.5342	5.09408	5.16312	9.68872	2.80854	9.75645	4.77602	5.36042	8.01685	8.76847	6.69531	9.71388	7.68774	6.28212	9.04712	1.83237	8.18733	5.729	2.18203	8.42826	8.15171	7.03228	1.0837	5.70139	5.2299	0.76455	1.96319	1.16221	8.59565	3.21464	8.39701	2.6414	2.17588	3.14532	6.80375	3.59755
Tanzanian	8.89293	6.62413	3.6791	3.81143	6.67239	7.84075	5.47713	9.75658	5.55316	2.54269	5.36414	6.74202	7.19652	11.4936	5.37013	5.69763	9.92056	3.51875	10.1673	5.38221	5.87619	9.9431	9.07737	9.23631	12.7649	8.85234	6.3087	9.46606	3.27176	8.44842	4.43866	1.64931	9.35435	9.34924	5.57823	0.827825	6.10684	5.71368	1.11502	1.46918	2.0631	8.50957	3.92909	8.34411	3.48583	3.59253	4.43653	8.47574	3.80233
Tanzanian	8.27299	5.80234	3.94452	3.2786	7.07788	8.19363	5.94775	9.42422	5.82841	2.22641	4.72907	6.84448	6.99966	11.2684	5.10193	5.54948	10.4878	3.03932	9.7827	4.97853	5.4111	9.14039	8.57731	9.28529	11.3698	8.20481	7.47536	8.97775	2.90666	9.39058	5.55223	2.10136	9.08141	8.75314	6.10794	1.11502	5.82099	5.56841	1.14113	4.6193	1.66786	8.23268	3.45648	8.49015	10.0583	2.7397	3.55291	7.60426	3.9185
Tanzanian	7.33871	5.58078	0.92345	1.98764	6.94298	9.0428	6.95899	9.16203	5.51217	2.89966	6.70695	6.26651	7.06708	11.362	6.0205	6.05227	10.1687	3.25391	9.97672	5.76121	5.99108	6.77939	10.03	7.30333	9.1819	6.93543	6.45714	9.31736	1.35054	8.27988	8.20566	5.72304	10.1054	8.29131	6.99155	0.838715	6.1201	6.59413	1.36947	4.09321	2.51482	8.69728	3.64202	8.18769	3.67869	2.83316	4.5295	7.26135	4.27212
Tanzanian	8.84315	6.14614	1.56803	2.71758	6.25337	8.57033	6.69901	9.40586	6.11911	1.66587	4.73989	6.28969	7.53295	11.0325	5.54302	5.47703	10.4933	2.90804	9.83422	5.42243	6.40462	6.93015	8.0853	7.64955	8.8375	7.7462	6.48407	9.45137	2.08347	9.18718	7.46632	1.8842	8.86364	7.94854	5.86873	0.966175	6.07322	6.13711	1.30477	2.50135	2.19771	8.2575	3.87141	7.16038	2.17843	2.63368	3.8957	6.81266	3.94182
Tanzanian	7.29502	5.51678	0.79332	1.93877	7.51137	9.17031	6.80367	10.5615	5.77813	2.34907	4.67016	5.66462	7.08319	10.9399	5.38002	6.21239	10.4162	3.85512	9.77105	5.35464	5.46131	7.43091	8.93058	7.08026	10.6377	7.18356	6.44039	9.425	2.00548	8.5907	5.37703	4.01227	8.90686	8.598	6.18517	0.635975	5.93447	5.33775	1.11564	2.65489	1.69969	8.8345	4.43614	7.76494	3.92386	2.15301	3.42372	7.3803	4.14027
Tanzanian	8.50685	3.60627	1.32678	2.55283	6.44391	8.21719	5.57021	9.81128	5.23337	1.71501	8.99995	5.66686	6.62388	11.1198	5.10333	4.9375	10.3538	2.2789	9.69146	6.02475	6.11636	8.00643	9.16149	6.36657	8.05116	6.78981	6.14616	9.33551	2.46007	7.42345	4.24287	2.30875	9.07719	8.08398	5.78942	0.887635	5.76182	4.79026	1.05594	2.02303	2.87593	7.8024	3.28487	7.12446	2.33994	1.82948	3.33793	6.91237	3.98172
Tanzanian	9.49701	6.38903	3.99864	4.00661	7.56999	8.73127	6.27369	11.0106	6.60977	2.5	4.84443	6.79446	7.3424	11.8604	5.74131	5.65588	11.7893	4.33561	10.1794	5.3649	5.89283	10.4491	9.3195	8.49659	13.4728	10.9156	7.27909	9.63697	2.7864	9.34173	9.63991	2.49201	9.52726	9.1504	7.11612	2.40824	6.02649	6.11461	1.39573	1.9956	1.37365	8.25649	4.23752	9.85016	3.48827	3.36891	4.44223	8.49906	4.54913
Tanzanian	9.4652	6.78026	3.87477	3.59851	7.00573	9.17234	7.10481	9.76117	5.89865	3.6512	5.98872	6.68818	7.93418	11.702	6.24262	7.14093	11.3231	3.70384	9.98392	5.87409	5.71853	11.4658	11.2246	12.4119	13.4665	11.4082	8.43711	9.76181	2.56705	7.85353	7.83374	2.12128	9.14762	8.87675	7.3838	1.73057	6.03779	5.31109	1.55521	2.3217	1.95375	8.72381	4.02963	9.10623	3.94415	3.50615	5.63966	9.10168	4.26659
Tanzanian	8.29519	5.85341	2.41249	2.78881	7.50334	12.3181	6.97661	9.22124	5.94749	2.6585	4.84415	6.16352	6.70005	11.6361	5.63215	5.30129	9.54237	3.39475	10.2581	5.83316	5.90207	8.56286	10.2545	9.55902	9.69274	6.95108	7.60337	9.11705	2.72165	10.3006	7.60762	4.17211	9.71795	8.7903	8.4748	1.02642	6.03937	6.53888	1.32773	2.46603	1.30696	8.37156	3.63531	6.90269	4.19285	2.62537	3.85314	7.51835	4.16815
Tanzanian	8.85304	6.26598	2.53989	3.06255	6.38884	8.65636	6.20853	10.1655	6.24573	1.62984	4.21399	5.88439	6.88774	11.298	5.48487	5.21441	9.23488	2.84897	9.70673	5.57008	5.56566	8.77304	8.72294	6.3193	10.118	7.92462	6.76525	9.43462	2.44435	7.60163	4.56714	2.10419	9.21612	8.5713	5.56351	0.940575	5.62432	5.22677	1.31581	1.61979	1.8659	8.20954	3.2666	8.38733	2.5827	2.51367	4.36898	7.1761	4.12121
Tanzanian	7.52379	5.82526	1.19333	2.0017	7.16105	8.97269	6.83342	9.75395	6.47105	1.56706	4.04286	5.76912	7.21949	10.8545	5.50767	5.64316	8.93464	3.07411	9.79885	6.22511	5.74089	7.00185	8.41863	7.17528	7.40296	6.70418	7.54904	9.43364	2.45648	9.48248	6.41107	2.25468	8.93446	8.0538	5.9196	1.15847	5.88589	5.10417	1.04113	2.39641	2.00569	7.86387	3.95949	8.14846	2.71608	2.9024	4.45228	6.87946	4.11771
Tanzanian	8.65578	5.90179	2.20809	3.59519	6.82461	9.71007	7.3501	9.7798	6.5473	2.33059	4.67879	5.9558	6.82071	11.317	5.62039	5.83197	10.207	3.26026	9.99707	6.43614	5.78058	7.04054	9.01043	7.57949	8.64237	7.34638	6.8921	9.44185	3.56438	8.06072	6.97173	1.84078	8.45374	9.02193	7.52521	1.13657	6.03554	5.03132	1.12182	3.51927	2.16382	8.48781	4.40944	8.18198	5.3571	4.62984	4.29122	7.49177	3.98004
Tanzanian	8.29656	5.10684	1.2997	2.04085	7.11574	8.43383	6.7438	9.28392	6.28346	1.88413	4.24017	6.2598	6.69098	10.6904	5.58451	6.11982	11.5973	2.16391	9.81107	5.34652	5.59271	7.31102	9.11985	9.36119	10.9665	7.79993	6.54826	9.5874	2.39115	7.91394	4.01687	1.40759	9.2469	8.05115	5.72196	0.597295	5.45859	5.06198	0.71702	1.7707	1.2083	7.75418	3.06954	7.61862	2.43811	2.16893	4.47216	7.39044	4.12435
Tanzanian	8.19322	5.47588	1.06418	2.2641	7.0878	9.43595	7.00623	9.12874	6.09886	1.83229	4.17924	6.42291	6.30454	11.1254	5.44006	5.50647	10.3984	2.48068	9.96049	5.50084	6.03461	6.77858	9.21528	6.87782	9.33779	7.59971	6.74045	9.61201	2.87105	7.02747	5.13654	2.13092	9.68109	8.44174	5.5714	0.884435	5.58171	5.31496	1.09024	2.51734	1.47491	8.77043	3.52136	7.81454	2.97813	2.12816	3.20062	7.06339	4.12486
Tanzanian	8.19711	5.45939	2.04237	2.14925	6.97949	11.6534	6.51196	9.30255	6.1323	2.291	4.03141	5.15114	6.85511	10.8798	5.36202	4.99418	9.65175	2.41309	9.99087	6.58493	6.13096	7.51377	7.72058	6.12876	10.114	7.37233	6.43145	9.62649	2.14861	9.36529	7.67391	2.19168	9.63167	8.23556	5.93303	1.12665	5.99697	6.06137	0.96739	2.63642	3.056	8.41063	3.34579	8.40667	2.57545	2.14541	3.61693	7.02602	4.19209
Tanzanian	8.33621	6.32238	1.85306	2.74843	6.95972	10.1761	7.72033	10.1266	6.2881	2.01483	4.17687	5.20615	7.31301	10.8286	5.39272	5.55286	10.8507	3.57712	9.89094	5.45853	5.68968	7.15282	7.83073	5.25983	8.2958	7.27104	6.0171	9.35396	1.6781	8.85938	7.32903	1.91837	9.11837	7.78611	5.0473	0.592065	5.70686	5.3872	1.18162	3.53436	2.70609	8.04407	3.26076	8.23207	2.31114	2.86479	4.71361	6.74484	4.38739
Tanzanian	8.26338	5.78428	2.44147	2.48581	6.87732	9.26264	8.01526	10.3544	6.1874	2.15397	4.55537	5.53721	7.63981	10.9348	5.68029	5.64954	11.6458	3.38413	10.0836	5.45601	5.89109	7.92051	9.49343	7.53986	10.0355	7.42947	6.68654	9.62189	2.34074	10.1092	8.11771	2.68766	8.98137	8.29246	7.91852	1.05863	5.93361	5.63481	0.9905	2.87626	2.08037	8.26947	4.89229	8.18938	3.34655	2.82185	6.73712	7.05471	4.16451
Tanzanian	7.77158	5.80684	1.73002	2.29441	6.89316	9.34445	6.49874	9.62109	6.85524	2.59675	4.8022	5.75812	6.83956	11.3331	5.47328	5.41028	10.381	4.10259	10.0806	5.1049	6.03079	8.62741	10.3071	8.24128	10.3091	7.73367	7.53468	9.18541	2.39152	8.22003	6.28761	3.24668	9.27774	8.30986	7.58839	0.768885	6.38307	5.7718	1.0193	2.06117	2.12703	8.67707	3.866	8.67605	8.86523	2.39618	4.46358	7.37676	3.96335
Tanzanian	8.64925	5.74291	1.80691	3.03985	7.44181	8.90795	5.34046	9.71068	6.24512	2.30278	4.29159	5.63476	7.10401	11.3859	5.48199	5.57681	9.57348	3.91156	9.98013	6.38259	6.1521	6.98116	9.13886	8.21832	7.99033	7.0655	7.25631	9.6224	1.97376	8.14012	6.14244	1.68186	8.82995	8.23469	6.28902	0.410345	6.17739	5.01727	1.47646	2.24306	1.48826	8.0645	3.69118	8.44909	2.96875	3.43095	3.57665	7.33763	3.95007
Tanzanian	7.8003	6.45183	2.55768	2.95342	6.35893	8.38077	6.83692	9.27177	6.48691	2.5581	4.07596	5.61329	6.8114	11.391	5.68265	5.79392	10.249	2.93819	9.94443	5.49958	6.30671	8.01718	8.72447	6.51462	8.6127	7.53681	8.42469	9.47871	2.10365	8.6595	6.82054	2.54775	8.60925	8.47488	5.88315	1.27904	6.36289	5.62244	1.19966	1.98049	1.38654	8.65424	3.81456	8.18568	2.60336	2.95937	3.46275	7.12157	4.15503
Tanzanian	8.19135	5.92202	1.61664	2.52936	6.73742	9.04697	7.11342	9.97283	5.72532	1.66337	3.88201	6.00739	7.28986	11.0372	5.75505	5.65374	10.3952	2.60256	10.1166	5.12048	5.62522	6.51961	9.00724	6.94025	9.61941	6.17995	6.94505	9.30032	2.8704	8.10867	2.51628	2.18845	9.28636	8.50216	7.81459	2.67824	5.92392	6.26135	1.06334	2.19132	1.51626	8.04461	3.0971	8.53008	3.51035	2.39077	3.29004	7.18243	4.17308
Tanzanian	7.13265	5.77947	1.33335	2.43106	7.07133	8.40911	6.38407	9.29248	6.61144	2.24766	3.84136	5.15337	6.31707	10.836	5.06764	4.76372	9.71804	3.27897	9.77809	5.23516	5.28957	6.78948	8.79567	7.02164	8.44608	6.36238	6.50784	9.3909	1.9703	7.16465	6.40801	1.81149	8.95547	8.41252	6.53195	1.85146	5.5282	4.60802	0.50133	2.53797	2.21873	8.17058	3.13723	8.35271	3.69033	2.39362	3.50102	6.63171	3.69099
Tanzanian	8.41346	6.28723	2.29716	3.0436	6.64285	8.19101	6.85297	10.0284	5.25317	2.48936	4.24495	5.24287	6.6615	11.0997	4.94112	5.32029	11.8029	3.87242	9.96293	6.55411	5.514	8.4235	8.54658	6.92105	8.6426	7.43076	6.60091	9.47939	3.03279	6.8213	5.72406	1.80462	9.42698	8.5913	6.06732	0.582435	6.01304	5.52121	1.16368	2.4751	2.66818	8.09597	3.3917	9.28461	3.67319	2.77329	4.42682	7.15902	4.02067
Tanzanian	8.68087	5.67356	2.82643	2.53482	6.98457	10.388	7.96117	10.1554	6.16052	2.28624	4.54153	6.41615	7.22232	11.2572	5.68904	5.46786	9.93378	4.14588	10.2857	5.22561	6.66373	7.93337	10.2388	9.18281	8.85248	7.6597	7.74198	9.01273	1.9963	9.16775	6.23482	2.21956	9.75516	8.50152	7.02527	0.761705	5.93053	7.79781	1.17294	2.50382	2.41068	9.05556	4.52609	9.06062	4.237	2.24112	3.89766	7.29404	4.02607
Tanzanian	8.10422	5.59889	2.63245	2.89834	5.96028	8.17877	5.84628	9.06198	5.72272	2.50964	3.25994	4.97942	6.98942	11.0173	5.51694	5.23548	9.73503	2.60616	9.78903	4.85722	5.6913	8.64405	8.90351	7.97502	10.5151	7.41739	5.29124	9.58122	1.89027	8.23187	7.44895	1.86705	9.18844	8.25432	8.47868	0.964415	5.62568	5.71063	1.29597	1.80312	1.1688	8.36017	2.90819	8.28373	3.35345	2.88315	3.25986	6.97305	4.0492
Tanzanian	8.22852	6.15351	3.37616	2.77073	7.05072	8.87733	7.97073	10.3164	6.35252	2.38355	4.34129	6.10292	6.54528	11.2128	5.4224	5.83913	10.4961	2.3986	9.80886	4.71601	5.54845	9.02242	8.44575	7.23018	8.70954	7.14391	6.23471	9.64836	2.66886	8.29273	5.23584	1.97209	9.1418	8.58154	5.45014	0.747435	5.66167	5.32827	0.83694	1.91465	1.13264	8.42302	3.4975	7.79378	3.72992	2.58383	3.70687	7.27672	3.54207
Tanzanian	9.202	6.11834	3.95938	4.04718	7.02992	8.25164	6.70742	9.52412	6.6083	2.41712	4.02011	5.38985	7.01721	11.6555	5.71442	6.3465	10.4108	3.83232	9.8297	6.19999	5.43754	10.1431	8.78188	8.37625	11.8041	8.59543	6.85747	9.58955	3.10434	7.59917	6.03639	2.10186	9.16177	8.26439	5.88617	0.962505	6.12277	5.5443	1.36714	2.1208	1.28668	7.94398	3.5421	9.25108	3.52915	3.24475	4.13314	7.44156	3.85352
Tanzanian	10.2561	6.45366	6.1724	4.9749	6.19152	8.48803	6.42451	9.69378	6.2957	2.43389	4.47502	6.62277	9.52402	13.1625	5.78487	6.15383	10.1822	2.62984	9.67306	5.79597	5.11202	10.7986	8.65134	10.5219	13.2122	11.084	7.03799	9.60161	2.49661	7.90843	4.61904	2.3056	8.31349	8.47083	4.93399	0.840915	5.88765	5.04207	0.79383	1.42847	2.21606	8.05784	3.22891	8.29612	2.34967	4.57944	4.43713	8.11942	4.08239
Tanzanian	8.71932	5.37113	2.88066	3.02015	6.61733	9.75502	6.07445	8.5178	5.53257	1.93044	3.86742	5.67814	7.05055	10.8425	5.64394	5.62695	10.5642	2.16269	9.49659	4.25259	5.77057	9.7331	8.35641	8.78635	10.9356	8.1112	6.73078	9.03915	1.34318	8.26268	4.33251	3.01008	8.67112	7.77493	5.38387	0.715145	6.00427	5.3803	0.83012	2.31555	1.53465	7.84138	3.85794	8.19912	2.4247	2.70865	3.72355	6.91341	3.94726
Tanzanian	8.56251	5.71758	4.03703	3.60958	7.27197	7.72637	4.72318	8.7068	6.38493	2.11945	4.01957	6.27677	7.03795	11.5999	4.7989	6.54024	10.7753	3.5695	9.88739	5.16242	5.66416	9.69444	8.22993	7.12032	10.4955	8.43587	6.20104	9.58423	1.88495	7.31881	4.63688	1.93358	8.99531	8.50238	4.87486	0.709835	5.69977	4.3728	0.77447	1.86193	1.34499	7.91823	3.50221	8.74272	2.72027	2.70062	3.53186	7.09267	4.07818
Tanzanian	7.01044	5.60743	0.96149	2.32602	7.61642	9.3543	6.96758	9.79115	5.753	2.49644	4.77241	6.38551	7.23523	11.0865	5.90006	5.2794	11.2564	3.66477	10.3575	5.12825	5.41591	6.15709	9.49813	8.24181	8.01836	6.17361	6.93905	9.42455	2.57218	7.45889	4.61865	2.49019	10.0385	8.56177	7.32437	0.723475	6.32029	6.33183	1.23769	4.34893	2.39287	8.48673	4.01079	8.29523	4.16031	2.063	3.83429	7.31328	4.1252
Tanzanian	8.03522	4.69543	2.21899	2.78244	6.3945	9.57188	5.86193	10.2988	6.13753	2.28056	3.38729	5.36029	6.77445	11.0951	5.34045	5.37598	10.0247	3.06764	9.98577	5.12555	6.08968	8.05332	8.69735	6.9398	9.86965	7.56916	5.50753	9.4117	1.71704	8.34927	5.04949	2.28688	9.44521	8.56029	5.7081	0.554515	6.04167	4.84926	0.84519	1.65259	1.39244	7.89975	3.7037	7.64816	3.70643	2.09066	3.10115	7.3223	3.92692
Tanzanian	7.7535	6.15958	0.91539	2.45576	7.17049	8.46456	6.41666	9.66147	5.99228	1.93416	4.35079	5.42849	7.05844	11.2666	5.52214	5.3838	11.0831	3.06085	9.86218	5.53552	5.98184	5.38579	8.56472	6.13235	6.03015	6.95529	5.66824	9.55693	1.71781	7.53751	5.99652	1.92874	8.95401	8.55328	6.22604	1.59021	6.26497	5.20657	1.23737	1.89023	1.84736	8.03882	3.53873	9.22217	3.14375	1.93598	3.47871	7.02951	4.18004
Tanzanian	6.9078	5.19508	1.698	2.02352	6.65411	8.8536	6.73923	8.98184	5.10398	2.2683	3.9337	5.78226	6.70886	10.7536	5.72633	5.6787	10.9597	2.52546	9.84788	5.18208	5.55001	8.17248	8.66722	7.76844	9.635	7.42622	7.90918	9.13621	2.5535	7.87043	3.20179	2.39106	8.60129	8.05315	6.29276	0.603705	5.93787	5.99913	0.90369	2.78124	1.27067	7.78177	3.97403	7.48285	3.16895	3.04486	3.09628	7.28332	4.04518
Tanzanian	8.18285	5.58713	2.9606	3.03494	7.01694	8.89702	7.03039	10.4148	5.53707	3.27739	3.68161	5.34997	6.76747	11.0172	5.28366	5.40639	10.1402	2.85628	10.0827	5.89909	5.74268	9.87168	8.89534	8.39482	12.5596	8.59038	5.56914	9.40685	1.74419	6.88065	7.54035	1.83428	8.89166	8.42163	5.54296	3.92063	5.93164	5.48433	0.95803	4.79718	2.05211	8.17116	3.46307	7.82479	3.7455	5.5774	3.90528	7.49533	4.30691
Tanzanian	10.1273	6.59565	3.37218	3.75057	7.15045	8.72108	7.09077	8.88583	6.31271	2.61401	4.7088	6.31393	7.14992	11.291	5.38918	6.09087	9.75168	2.54262	9.86727	6.64687	6.34911	10.822	8.97662	8.33498	12.6378	10.7838	6.51288	9.33794	2.18514	7.81841	5.14522	4.82733	9.66466	8.73878	5.93397	1.51703	5.76835	5.63255	1.3102	2.04573	1.63871	8.14842	3.53365	7.47607	2.59066	3.7294	5.92418	8.88961	4.17592
Tanzanian	8.69876	5.32076	3.61492	3.29019	6.45491	9.56033	6.74427	10.3148	5.64276	2.18095	5.20139	6.03803	7.11886	10.9712	5.34563	5.57022	10.706	3.34986	9.70672	5.39959	5.4052	12.0543	10.4408	11.0752	13.6497	11.1102	7.34886	9.45449	1.35579	7.3495	6.47644	1.82496	8.99732	8.64842	6.97781	0.693215	4.8902	5.40932	0.95295	1.82111	1.74259	7.76521	6.37129	8.22217	3.11214	3.62519	5.93883	8.24296	4.24026
Tanzanian	8.23692	5.55422	2.58198	2.93968	7.38631	8.77227	7.28393	9.61835	5.81684	2.51826	4.25802	5.15747	7.48598	10.9454	5.83994	6.2599	12.311	2.16045	9.79153	5.02634	6.20954	8.31564	8.12471	6.87603	9.34519	8.01047	6.04687	9.32321	1.46781	8.28218	6.44975	3.17152	8.45782	7.9369	5.88977	2.00551	6.2847	6.11784	1.45174	4.56854	1.93925	8.17028	3.83865	9.29377	3.11218	3.46429	3.52538	7.07848	4.21698
Tanzanian	8.40827	5.65337	4.09425	3.30054	7.10218	8.29886	6.52631	9.06117	5.61365	3.58358	9.31188	6.19465	7.03428	11.1929	5.50969	5.81081	10.0706	2.8014	9.58785	5.32727	5.58604	10.5338	7.75992	9.59455	12.7283	9.15441	5.69179	9.54366	1.74436	8.97222	7.61016	2.30491	9.23803	8.1398	4.52941	0.941315	5.48548	5.2088	1.09221	1.88365	2.11746	8.04487	3.22503	7.48273	2.72706	3.22564	4.00134	7.1962	4.2257
Tanzanian	8.06588	5.34094	3.05483	2.73948	6.85203	8.64397	7.63885	8.97235	6.11698	2.03903	9.24723	5.84527	7.13038	10.9933	5.11902	5.51241	11.0717	3.14277	9.89015	5.30988	5.94735	8.89062	9.11376	6.61047	11.2627	8.40887	6.36067	9.44791	1.77995	10.2446	7.42501	5.21542	9.11013	8.28844	6.58669	0.860345	5.39999	5.61017	0.75353	2.24126	1.52565	8.97323	3.42204	7.60088	2.62969	2.46699	3.6316	7.3658	4.2745
Tanzanian	8.8482	6.10625	4.92835	4.23013	6.47302	8.81711	6.71132	9.79966	6.04028	2.08426	11.2818	6.60182	7.18974	11.4579	5.32151	5.55898	11.4615	4.55462	9.99481	5.75184	5.91894	10.7068	9.16166	7.03496	11.5929	9.67034	7.36562	9.46785	2.03247	8.49325	7.08088	2.73304	9.0589	8.74786	6.77138	0.921135	6.3879	5.99559	1.69489	3.19133	2.03121	8.54038	4.18168	8.99602	3.61206	4.23052	4.01691	7.71953	4.32666
Tanzanian	7.37821	5.84302	2.96484	2.93522	6.82535	7.71077	6.03674	10.082	5.44968	2.10374	9.56314	5.30499	7.17195	11.0329	5.97042	5.89426	7.67823	3.25581	9.89934	4.71288	5.90472	9.05734	9.07521	7.3803	9.63368	8.04063	6.60274	8.87381	1.57676	8.73775	4.16618	1.9608	9.32686	7.74838	7.29285	1.11521	5.86709	5.6525	1.20911	1.77679	1.28626	8.0757	2.90788	8.82293	2.61851	2.29186	3.46201	7.06809	3.92896
Tanzanian	7.64661	5.6506	2.9656	2.77947	5.97202	8.03026	7.1739	9.30499	5.49099	2.1287	3.72108	5.21457	6.24845	10.7605	4.91092	4.69961	8.92879	1.94447	9.60516	5.75629	5.74905	7.97631	7.99613	6.968	10.2111	7.19207	5.46955	9.20118	1.57925	7.6982	6.8845	1.98721	8.64893	7.63747	5.04192	1.61547	6.03071	5.15808	1.1014	2.29239	1.39542	7.733	3.33122	8.14441	2.44886	2.13975	2.5026	6.87673	3.69743
Tanzanian	8.9192	5.98557	4.28923	3.81397	6.77029	9.34942	7.757	9.78688	6.47637	2.35732	4.42765	6.86578	7.41956	11.6878	5.4987	5.89337	10.4958	3.13252	10.1241	6.13644	6.14808	10.0382	10.0404	7.50919	10.8653	8.76145	7.68253	9.67512	2.51539	8.22577	6.9984	3.52095	9.85834	8.71744	10.6645	1.50362	6.24552	5.76272	1.79179	3.04427	2.71105	8.9507	4.41775	9.00643	3.36972	2.98813	3.68977	7.50247	4.37537
Tanzanian	9.70555	5.78636	2.82355	2.83068	6.67053	8.29234	7.22371	9.95264	6.13382	2.02388	4.30889	6.06905	7.12771	11.0398	5.54303	5.46589	10.4418	3.54537	9.89562	5.92566	5.57997	7.31628	8.59744	7.91679	9.36603	7.35098	6.83235	9.0933	2.34769	8.35815	6.77523	2.6225	8.31343	8.61422	6.90821	1.84828	6.03944	5.643	1.05511	2.54942	2.16641	7.95026	4.35694	8.47136	3.40624	2.14406	3.74682	7.39456	3.90954
Tanzanian	8.07621	5.87852	2.29073	2.37947	7.01014	9.00585	7.07684	9.75001	6.43522	2.41353	3.94572	5.51448	7.41379	11.0579	5.64219	5.58789	9.54353	2.77324	9.99057	5.8408	6.13196	7.8061	8.85607	7.59531	8.4483	7.65226	6.75788	9.06073	2.00956	8.57462	6.48389	2.7136	8.73846	8.36298	5.71973	2.44199	5.91049	6.04047	1.21916	2.01201	2.05396	7.93678	3.56751	7.69562	3.15732	2.17589	3.37213	7.26807	4.11553
Tanzanian	7.93565	5.59431	3.67613	3.43729	6.25589	8.20802	7.18113	9.49282	5.70927	2.25686	10.8555	5.78651	6.88727	11.1062	5.7508	6.21908	10.0989	2.65842	9.5337	5.87862	5.62427	10.3443	8.59789	8.11361	12.2705	8.40115	7.15229	9.32174	3.08806	7.73067	8.22539	2.55077	8.74454	8.30652	6.53603	0.556225	5.40735	5.47166	1.03031	1.604	1.39057	8.21027	3.08921	7.98562	1.77016	3.22137	4.57493	7.73214	4.04637
Tanzanian	7.67516	5.82493	2.32909	2.82135	6.81485	8.54877	7.14687	10.5553	5.83052	2.20304	10.2132	6.24486	7.26825	10.9824	5.66834	5.56726	11.1189	3.5005	9.86694	5.59226	5.71839	8.03267	8.7395	8.12791	9.56433	7.06252	6.83031	9.45883	2.04854	7.53217	7.75044	2.19014	8.7165	8.10886	6.087	0.812155	6.07151	5.39794	1.27394	2.70509	2.34676	7.79768	4.06288	7.36665	2.78631	2.05647	3.67076	7.13551	4.12656
Tanzanian	8.60937	5.74697	1.60735	2.36279	7.13761	8.39574	8.55427	9.36173	6.25462	2.27962	7.90834	5.79458	6.80152	10.8417	5.72279	5.35602	10.613	2.96955	9.94764	5.23242	6.04154	6.94989	8.2915	7.90672	7.4844	6.66756	6.73179	9.26655	2.10952	8.3401	4.65567	1.97327	8.65353	8.14744	6.29142	0.775725	5.77097	5.85902	0.97079	2.09074	1.38755	7.82894	3.26521	9.03345	3.31623	2.88542	2.77844	7.13178	3.94311
Tanzanian	7.53397	6.33251	2.4261	2.46908	6.90975	8.33765	6.52853	9.61009	6.19662	2.35923	4.32461	6.19726	7.53588	11.0456	5.5543	4.89989	10.9918	3.52544	9.73135	4.9521	6.05484	7.99658	8.6898	7.38497	9.78464	7.95831	7.08188	8.90904	1.9947	8.93997	4.17191	2.4331	8.41837	7.95257	5.73002	1.38155	5.65768	6.11198	1.06132	2.27921	1.93349	8.20506	3.21025	8.68165	2.76905	2.04376	3.43778	6.97567	3.74515
Tanzanian	7.90376	5.52712	2.30287	2.51712	6.9997	8.50017	7.20308	9.34921	5.04657	2.38993	4.324	5.27206	7.00067	11.0934	5.14365	5.17431	10.9824	2.66596	9.99091	4.80508	5.54442	7.4406	8.58106	6.61274	10.3864	7.76736	6.22478	9.09106	1.81299	8.24564	4.78771	5.40334	8.65556	8.21931	4.6447	0.778565	5.90759	6.09769	1.18523	2.66401	2.06849	8.32306	3.64934	7.6966	3.56835	2.05569	3.3528	7.04349	3.82038
Tanzanian	8.26267	5.72389	4.44654	3.79199	6.64564	10.3774	7.78311	9.22814	6.04999	2.07011	11.584	6.21877	7.14665	11.2074	5.49873	5.11456	10.1974	2.85132	9.85855	6.49664	5.97868	10.569	8.34356	8.09204	12.5861	9.12247	6.60281	9.23368	1.21728	9.13575	4.99108	1.99535	9.10013	8.25597	7.37129	1.35244	6.32986	5.01839	1.18592	3.18665	2.34369	7.81177	3.79162	7.39194	3.04128	2.89505	4.39589	7.49697	3.95209
Tanzanian	8.57902	6.08748	4.68723	3.38383	7.37838	8.85632	7.32438	9.76806	6.4219	2.38148	4.93684	6.52189	7.21546	11.4896	5.29599	4.89431	10.1252	4.14295	10.1956	6.27218	6.19765	10.5719	9.36419	9.26271	13.1122	9.54997	6.75457	9.57412	1.96263	7.46326	6.11605	2.23014	9.32615	8.76787	6.30611	1.48948	5.80582	6.26832	1.30045	3.81669	1.59444	8.51374	3.64326	8.75451	3.56722	3.76098	4.67143	7.84624	4.17475
Tanzanian	8.93282	5.70165	5.6747	3.82222	7.15952	9.00718	8.48031	9.31235	6.72185	1.90414	4.24137	5.86132	7.52772	12.3154	5.66175	5.73133	9.63387	2.24921	9.71305	5.85863	5.4888	10.3989	8.73833	7.04334	12.192	9.12283	7.70327	9.46671	2.5193	8.54143	4.758	1.5676	8.90056	8.10746	5.23668	1.36776	5.54613	4.9877	1.24001	2.43948	2.21473	7.92943	3.6696	8.09006	2.4791	3.52234	4.26939	8.24132	4.00361
Tanzanian	8.55238	4.94024	1.38209	2.73971	6.81584	8.35556	6.81448	9.60472	6.09938	2.15154	5.78015	5.322	6.83052	10.7555	5.41959	5.16531	10.5539	2.27724	9.74723	5.21315	4.92593	4.92922	8.31071	5.84733	6.02804	6.09929	5.95158	9.08632	4.04913	7.7996	7.15232	4.20059	8.21091	8.02028	5.14239	1.16362	5.29345	5.02729	0.95905	3.28508	1.5064	7.83849	2.866	8.28959	2.90333	1.75444	3.33423	6.29899	3.44995
Tanzanian	8.58818	5.00369	1.69737	2.32881	6.39282	8.28214	6.28904	9.01548	5.65611	1.85064	5.72738	5.87822	7.25694	11.0544	5.3891	6.02855	9.21847	3.02309	10.06	4.82109	5.42539	6.77243	8.72313	6.91988	8.37884	6.61803	5.71303	9.35802	1.82248	7.76075	6.3001	2.06702	8.93533	8.01959	5.99975	0.702025	6.13887	5.51049	0.75698	1.70522	1.40949	8.44132	3.78096	7.9307	3.79524	2.42362	3.45568	6.81944	4.13994
Tanzanian	8.2029	5.68152	1.53265	2.55593	5.81015	8.20964	5.5294	8.73964	4.80126	1.80163	3.38346	4.78087	6.76797	10.9463	5.05656	4.93293	10.3761	1.84956	9.65392	5.40194	5.92799	5.69789	8.19316	6.92044	6.50516	6.59011	5.52309	8.9385	1.89285	7.07031	5.61018	1.52086	9.48348	7.71988	5.22584	0.674995	5.81918	4.97999	0.87338	1.83815	1.49235	7.65933	3.12446	7.79974	2.45404	2.15958	2.9218	6.43823	3.77837
Tanzanian	8.03677	5.76213	1.78335	2.49475	6.40603	8.88124	6.54549	8.92268	5.89527	2.15779	3.81252	5.37924	6.91907	11.1346	5.87962	5.92575	10.9766	2.45899	9.74815	5.54466	5.80077	6.692	8.39146	6.23393	8.31578	6.70651	5.98299	9.58548	2.16933	7.05748	6.07346	2.44484	9.49696	8.09121	5.39479	0.637205	5.69369	5.59609	1.03381	2.64319	1.7367	8.1933	3.78378	7.38162	2.39985	1.80963	3.665	6.75852	3.96759
Tanzanian	8.14602	5.92499	1.86311	2.45199	5.85745	8.15652	5.91725	9.6072	6.65315	2.50634	7.24275	6.24481	7.11438	11.1758	5.5462	5.69911	10.8362	2.45298	9.77258	5.34502	5.70171	6.57625	9.43766	7.08544	6.84279	6.88973	6.8049	9.12822	2.3003	7.51656	5.08282	2.11831	9.58581	8.19701	7.079	0.662365	5.67493	5.63934	0.81925	3.07765	2.1814	8.20847	3.72247	8.30885	3.28963	4.64565	4.15591	6.83901	4.12662
Tanzanian	8.92868	5.72675	2.51525	3.79987	6.12351	10.8823	5.79554	9.42147	5.46938	1.65073	8.0807	5.37526	6.62562	10.9307	5.49565	5.50741	11.0503	2.62433	10.1862	4.81128	5.0318	7.44499	8.39265	6.63114	9.09478	6.91509	6.33854	9.28938	3.78507	7.6563	8.21611	2.55438	9.17289	8.38163	6.00776	1.41814	5.9134	6.39799	0.80903	1.60364	1.48019	8.72103	3.76694	9.67081	3.67758	2.13178	3.21973	6.73698	3.52268
Tanzanian	8.0375	5.69548	1.70941	2.38873	6.96076	8.67474	6.99186	9.31817	5.93663	1.81094	4.56227	5.35198	7.40101	11.0281	5.70708	6.0442	10.3149	3.75818	9.90646	5.15128	5.7694	7.08861	8.55612	6.12458	9.7668	7.38295	6.35525	9.55775	2.00144	8.13029	6.32164	2.73595	8.72315	8.31201	5.76902	1.38799	6.04134	5.71209	1.09277	2.25973	1.55583	7.80857	3.68918	8.36736	2.83425	1.96948	3.1552	6.76769	3.8996
Tanzanian	7.75003	5.86571	2.10419	2.62291	6.13024	9.13099	6.145	8.80944	5.73702	1.83813	3.50475	7.09452	6.87678	11.0182	5.21116	5.25537	9.2628	3.41875	9.90481	5.20798	5.49977	7.53709	9.87345	6.89338	8.66916	7.10485	7.17851	9.19107	3.06026	6.56323	5.20894	2.27651	8.1859	8.2328	7.86045	0.818445	5.85353	5.66439	0.77818	2.57953	1.76702	7.8969	4.78611	8.04752	5.08061	2.16212	3.8644	6.54111	4.10603
Tanzanian	8.53505	6.3564	2.36892	2.86355	7.51819	9.47607	7.89148	10.2618	7.3472	1.88742	3.9164	5.50805	7.07356	11.4661	5.86199	5.71542	11.6993	3.36158	10.1952	5.54225	5.77059	7.46859	8.59354	6.87555	8.06755	7.08638	6.70554	9.6464	2.42469	8.26999	5.76036	2.16764	9.15883	8.61814	7.02968	1.31096	6.21324	6.07749	1.45029	3.09726	2.36591	8.50234	3.95668	7.75014	3.24381	2.21837	4.27144	7.01813	4.18575
Tanzanian	9.30678	5.85393	2.44869	3.28018	6.70026	8.70809	6.72096	9.72081	6.92354	1.92703	3.81341	5.54756	6.94675	10.969	5.52779	5.55121	11.4425	2.73977	9.95107	5.59031	5.55596	7.26572	8.14175	6.82359	7.53716	6.70866	6.23827	9.42775	3.50771	8.00319	4.81213	2.48292	8.43309	8.42221	5.28035	1.1257	5.87627	5.52358	1.01073	2.42351	1.68032	7.83214	4.14673	8.47629	2.53338	2.25579	3.47544	6.90914	3.82375
Tanzanian	7.72814	5.45704	1.80734	2.33998	6.55623	7.74967	6.15531	9.49334	5.37162	2.27135	3.77901	4.86946	6.93848	10.6175	5.72135	5.39259	8.25558	2.37554	9.55316	5.58308	5.31953	7.56931	8.17589	6.791	10.2191	6.64642	6.55948	9.3686	2.7817	9.59986	6.99562	2.7719	8.53191	8.12419	5.41389	0.422055	5.67169	4.72691	0.86676	2.34569	2.863	7.75103	3.30722	8.03696	3.21143	2.32986	3.19212	6.63696	3.54335
Tanzanian	9.00863	5.92131	1.39639	2.77128	6.98644	8.70868	8.702	9.63894	5.96338	2.32774	4.34647	5.74894	6.98349	10.5823	5.10203	5.23426	10.3362	2.46902	9.83953	7.20336	6.03386	6.80879	8.51282	6.32678	6.9913	6.44102	6.56508	9.73457	2.61436	8.10168	5.14392	1.91834	8.73794	8.23525	5.66825	0.891465	5.8852	4.63136	1.31799	3.40915	2.84832	7.86429	3.68635	8.41446	2.30565	1.89463	3.8064	6.73987	3.74999
Tanzanian	7.93564	4.99751	2.20828	2.39941	5.76618	8.65727	6.69769	10.1174	5.62052	2.04249	4.64809	5.4794	6.92228	11.0093	5.41972	5.01497	10.4785	3.2039	10.3084	5.15027	5.08787	7.76213	9.52486	8.39706	10.2486	7.50117	6.93429	8.84128	2.42475	7.2423	4.82521	2.01695	8.81828	8.24198	9.5328	1.10027	5.43079	5.87211	1.13008	2.39525	1.94375	8.52948	3.65207	7.93677	3.36551	2.12793	3.2807	6.58835	3.81002
Tanzanian	8.19584	6.32993	2.55202	2.8973	6.80651	8.70823	6.83805	10.3804	6.64212	2.46868	4.48423	5.67758	7.69418	11.5481	5.70335	5.29068	11.1165	3.91703	10.2803	6.98499	6.61004	7.44283	8.72055	8.2233	8.00145	7.22346	7.2131	9.13398	2.09879	6.82519	7.44155	2.12898	9.50601	8.29313	5.48371	1.03663	6.07053	5.76511	1.59707	4.30824	2.41436	7.60448	3.97711	7.95911	3.8795	2.2516	4.57364	7.24927	4.46895
Tanzanian	8.76215	6.17134	3.37536	3.1723	7.01099	8.23029	6.19265	9.27876	7.07149	1.97285	3.90255	5.79803	6.89546	11.4263	5.65948	6.56069	9.48301	4.03306	9.70536	5.74928	5.85731	9.73511	9.55275	7.95837	10.0321	7.52482	8.14832	9.58585	2.88414	9.75099	3.55158	2.04962	9.50447	8.06159	7.87068	1.20277	5.84799	5.50767	1.09658	2.09443	2.11022	8.21219	3.68077	8.84439	2.53586	2.91439	3.46538	7.07339	4.44017
Tanzanian	7.87122	5.34197	2.87543	2.90789	6.21858	7.93016	6.50714	9.49452	5.67319	2.02486	3.55147	5.90951	7.02799	10.688	5.64737	5.33357	10.4091	2.17598	9.76731	5.81843	5.67344	8.36682	9.07462	6.95513	9.96177	7.99374	6.94857	9.62325	2.72777	7.35274	5.79916	2.2733	9.11576	8.43437	6.38441	0.833855	5.52337	5.47809	0.76522	2.24769	1.84262	7.99769	3.59626	8.94445	3.28417	2.06622	4.71228	6.97257	4.18114
Tanzanian	7.23086	5.19602	2.50328	2.41167	6.36376	8.78463	5.62408	9.05077	6.10194	2.00003	3.32122	4.58777	6.53296	10.6933	5.05599	5.43832	9.95147	2.43685	9.41022	4.83136	5.13951	7.88954	8.06501	6.95123	8.87913	6.90515	5.88556	8.98356	2.16304	7.87603	4.40866	1.84425	8.67483	7.89946	5.11628	1.0741	5.6627	4.59731	0.74711	2.25344	1.33746	7.43541	2.8017	6.89959	2.1057	2.57942	2.90768	6.72147	3.57718
Tanzanian	7.91012	5.76921	2.79124	2.6478	6.80752	8.86115	6.04127	9.56244	5.40066	2.62189	3.62256	5.3507	7.20884	10.9954	5.37236	5.72562	11.8902	3.3184	10.2882	4.84297	6.04519	8.28181	8.8614	7.22082	9.12401	7.52916	6.64792	9.4775	1.3358	8.6455	4.45372	2.39678	8.76952	8.29953	5.59113	0.685615	6.09349	6.71805	1.07887	1.89619	1.33228	8.5279	3.77555	9.49419	4.65489	2.19029	3.0508	7.27323	3.8554
Tanzanian	8.53669	5.60963	2.9877	2.94511	6.87847	8.4499	7.07687	9.50859	5.82707	1.73433	4.34032	5.7988	7.21484	11.3899	5.43962	5.9147	9.09281	2.88096	9.86325	5.2964	5.56666	9.04355	8.97218	6.54875	9.87076	7.67933	7.72912	9.62655	2.68465	7.85295	7.236	2.87681	8.311	8.26655	6.53334	1.02448	5.72394	5.68745	0.92168	2.8374	2.20668	7.57702	4.91659	8.46495	2.57899	4.30908	4.04965	6.89581	4.26243
Tanzanian	8.81452	6.44322	2.76591	3.44586	7.26992	8.52548	6.5479	9.48875	5.88183	1.8372	4.72185	5.90473	7.43346	11.1159	5.18224	5.39853	9.60872	2.38589	9.74564	5.13141	5.76673	8.74414	8.76353	6.24332	11.0796	7.43727	6.33378	9.73642	3.48877	9.55931	3.19743	2.43816	8.68619	8.54738	5.40647	0.999985	5.99575	4.78106	1.03233	2.53179	2.15015	7.85844	3.53329	8.99498	2.82084	2.24178	3.69118	7.31135	4.22319
Tanzanian	9.25036	5.92777	4.07952	4.01065	8.67025	9.44164	6.33533	11.0552	6.49988	2.26128	4.30929	6.33474	7.96313	11.437	5.68993	6.29115	10.3901	4.28481	10.3025	6.44505	6.68818	9.90197	9.56734	7.76652	12.6068	9.06446	6.87174	9.66715	1.64692	9.25943	6.46862	2.5799	8.95541	8.50148	6.60834	1.27273	6.49097	5.85043	1.4981	2.07475	2.46013	8.82862	4.12793	9.23128	2.69568	2.91327	3.79815	7.66423	4.52575
Tanzanian	9.9639	6.86576	4.03947	4.18093	7.06204	8.40123	6.86421	9.73389	6.34741	1.87299	4.32522	6.10511	6.70681	10.9743	5.21571	5.98501	10.5363	3.57478	9.84703	4.95358	5.60803	9.62312	8.68705	7.55738	10.3714	8.25244	6.91742	9.59934	3.66276	8.25849	4.67132	1.95957	8.94377	8.17407	6.40825	0.598975	6.83103	5.01138	1.23406	2.687	1.65786	8.07578	3.22988	9.47958	2.37434	2.75874	3.91041	6.96535	3.95388
Tanzanian	8.62425	5.83402	4.21536	3.64571	6.45092	8.86045	6.53101	10.2128	5.33537	2.87518	10.6265	6.19107	6.89853	11.2346	5.6188	5.55445	11.3335	3.15599	9.97229	5.34392	5.42514	9.85636	8.93736	8.61011	11.7993	8.76173	6.67398	9.28073	1.71524	8.10267	6.21611	2.80762	8.44374	8.52458	7.17605	0.747145	5.86233	6.02879	0.89504	2.20611	1.54533	8.21157	2.97535	8.24283	3.63517	3.30642	3.72259	7.33117	3.52991
Tanzanian	8.72105	5.17206	4.23103	3.40492	6.92112	8.6029	5.97216	10.0667	5.82038	2.31859	4.23348	5.67056	6.9956	11.1011	5.26521	5.34617	10.5453	2.5625	10.144	6.04062	6.14199	10.1375	8.19954	9.17297	11.1112	8.84446	6.43734	9.29019	3.02562	7.39952	5.09125	3.29078	8.99249	8.30896	7.77654	0.761135	6.09574	5.79505	1.05623	2.13825	1.68273	7.80177	3.42363	8.48964	3.63014	3.39513	4.05532	7.23857	3.90535
Tanzanian	9.44633	5.5538	3.13738	3.65171	6.52571	8.53815	7.03375	9.15616	5.74622	2.26322	4.44907	6.21969	6.75164	11.2133	5.08418	5.21249	9.01167	3.79558	9.70342	5.36163	5.35315	9.27202	8.2128	6.93069	9.58751	8.50632	6.02829	9.62519	3.06806	7.46837	6.75873	1.93027	8.91437	8.30428	5.76209	0.858065	5.34464	4.57768	0.92229	4.98667	1.63841	8.08083	3.13311	8.99011	2.67537	2.6278	3.82351	7.38572	3.94328
Tanzanian	8.68651	6.26046	3.75714	3.72107	7.21909	9.09047	5.79372	10.0926	6.99352	1.7704	4.2614	5.4913	7.1197	11.5122	5.78111	6.03122	9.21539	3.45744	9.54528	5.86186	5.84131	9.93704	12.038	8.31559	12.1417	8.23061	9.0506	9.38664	2.22058	8.34805	4.95044	2.08887	8.74288	8.35584	5.14161	3.10959	5.84295	5.79002	1.23306	1.7379	1.71557	7.83599	3.8575	8.40911	3.11388	3.02662	4.10272	7.07944	4.23104
Tanzanian	8.0066	5.89062	3.01855	3.03073	6.14297	7.91899	5.0122	8.91335	5.40895	1.87999	3.33975	4.89571	6.5926	11.6709	4.70854	4.98728	9.59062	2.40714	9.57445	5.8569	4.91318	8.70933	8.21775	6.32923	9.25358	7.19479	5.7047	9.29238	1.93053	6.87146	5.84117	2.08462	8.72603	7.95115	5.29185	0.599515	6.32041	4.28869	0.62392	1.86851	1.32614	8.42701	2.80214	7.26994	2.57359	2.42486	3.80061	6.7131	3.88551
Tanzanian	9.23882	6.02023	3.99744	3.48852	7.09106	8.98228	10.5244	9.61598	7.82547	2.06907	4.75781	6.26685	7.24691	11.4805	5.46447	5.62474	10.7082	3.40828	9.81916	6.28208	6.00831	10.0739	9.01859	7.88375	12.8922	9.27868	7.23691	9.799	2.2378	8.31477	6.86078	2.59951	8.72391	8.75982	6.22937	0.727755	6.17936	6.01494	1.16333	3.69929	3.48771	8.85562	4.57053	8.45044	3.41456	2.70142	4.69683	7.6127	4.05115
Tanzanian	9.43436	5.97037	5.65799	4.82132	6.57021	8.24521	6.08843	9.41388	5.50554	2.22309	4.30966	5.54268	7.41809	12.1989	5.43876	5.7718	9.85454	2.44502	9.59554	6.19399	5.24271	11.0607	8.04559	9.86527	11.3256	9.73691	5.49078	9.43302	2.17821	6.96727	4.2088	2.08198	8.6159	7.97928	5.24894	0.893165	5.76373	4.58075	0.88681	2.27756	2.31345	7.17229	3.24012	7.95373	2.11655	3.83282	3.81924	7.72762	3.8563
Tanzanian	8.70815	6.01004	3.12795	2.96956	7.09205	8.61514	8.81068	9.59356	6.78435	1.80714	5.14281	6.75925	6.95847	11.1277	5.00129	5.17628	10.2949	2.87718	9.66989	5.1756	5.90271	7.64039	9.45938	7.08765	9.062	7.38103	9.11126	9.64115	2.19848	9.00451	5.89217	1.94295	8.88085	8.58368	6.3906	0.700315	5.48445	5.87338	0.89896	1.69578	2.35299	8.19142	4.48613	8.14805	3.25355	2.43899	4.39059	7.01548	4.14616
Tanzanian	7.48599	6.14105	2.24924	2.55514	6.40198	8.22158	6.19964	9.08614	5.61491	2.54309	7.13969	5.75225	7.11945	10.8862	5.21562	5.81675	9.6242	3.79757	9.69428	5.43346	5.86388	8.08299	8.44813	7.52653	8.89399	7.41659	6.41174	9.4027	2.57896	7.59478	6.13854	2.89898	9.00803	8.29411	5.95225	0.701675	6.09699	5.24332	1.10048	3.4069	1.94263	7.58705	3.23864	8.04926	3.13406	2.19636	3.43715	6.9924	4.23468
Tanzanian	8.29941	5.63234	2.62637	3.21461	6.59757	8.73231	6.31889	9.95022	5.83507	2.30171	4.32873	5.69299	7.22365	10.7331	5.41363	5.46715	10.2756	2.3874	10.1829	4.17118	5.61759	8.77169	9.52727	8.0558	10.5839	7.13384	6.84649	9.5273	3.04218	8.05129	4.8186	2.18841	8.87012	8.24722	6.01384	2.63633	6.05947	6.13511	0.82908	2.35899	2.38814	8.00816	3.68003	8.44094	3.78519	2.68284	3.90209	6.97234	4.12483
Tanzanian	8.98958	5.46092	4.48482	3.97827	7.58291	9.53382	7.2897	9.69706	6.32625	2.13095	4.67164	5.97699	6.89951	11.1833	5.12312	5.13915	9.68202	3.0596	9.89683	5.52297	5.15236	9.02914	9.3445	9.15262	9.35676	8.4429	8.90081	9.24592	2.52775	9.12495	6.24374	2.10079	8.63777	8.40496	6.24316	0.653305	5.33357	5.05535	1.05304	2.46638	2.20101	8.03927	4.84872	8.93245	4.66338	3.16877	4.45005	7.61189	3.96575
Tanzanian	9.65494	6.10389	2.83194	3.93136	6.97306	8.51478	6.74131	10.3809	5.83807	1.6579	4.43553	5.75683	7.06501	11.2654	5.64556	6.04807	9.31425	4.37437	9.70187	4.95059	4.75091	7.72323	8.59316	6.10387	10.5682	7.22609	6.84586	9.4558	3.80129	8.40943	6.78167	2.11978	8.97926	8.65924	6.30764	1.02816	6.2256	4.74153	1.23464	1.63226	1.95005	8.46829	4.28069	10.1704	2.73937	2.02456	4.06211	7.14339	4.12512
Tanzanian	7.68257	5.64541	2.71773	2.43526	6.20062	8.02202	5.78383	9.10271	6.27356	2.16356	3.81636	5.31825	7.00233	11.0051	5.03351	5.15426	9.76345	3.24295	9.58453	6.04246	5.36249	7.58784	7.97822	7.04645	8.73174	7.78967	5.61845	8.76374	2.40799	8.81466	7.02109	4.05523	8.84032	7.73238	5.31559	0.747355	5.72328	4.02203	0.90881	2.10534	1.39385	7.46436	2.81875	7.32467	2.93688	2.09278	3.51854	6.80084	3.5403
Tanzanian	7.99988	5.86986	1.65191	2.23758	6.10411	8.70176	5.86883	10.6838	6.00648	2.15366	4.0693	5.44782	7.28879	11.3034	5.4571	5.55912	10.4547	3.02856	9.93754	5.30185	6.31767	7.34959	8.93903	6.39084	9.87505	6.5548	6.85414	9.32432	1.82126	6.9974	5.72896	2.54808	8.97039	8.1474	7.28752	0.620115	6.20639	5.38814	1.43095	2.30118	1.97998	8.33711	3.89554	8.41104	3.88109	1.73766	3.09428	7.16354	4.27953
Tanzanian	9.51735	5.85565	2.34125	3.95114	7.49398	8.98179	5.84958	9.78433	6.71964	2.49501	3.54087	5.32693	7.58431	10.9007	5.59025	5.50941	11.0814	2.87791	10.0351	6.32927	6.32466	7.22513	8.59542	6.45942	8.58521	7.87849	6.13474	9.34027	3.53496	8.80826	6.12648	1.92887	8.19047	8.52685	6.00331	0.929575	6.4627	5.64215	1.03895	1.65867	2.06394	8.34999	3.07754	9.16815	3.0251	6.1857	3.96616	7.1677	3.92896
Tanzanian	8.47049	6.69034	1.78114	3.15308	7.16698	8.46846	5.92156	8.83461	6.34115	2.06823	4.42947	6.08704	7.55895	11.163	5.25982	5.64999	10.48	4.11831	10.127	7.06428	5.68844	7.39597	8.89007	7.00279	9.16652	6.46903	6.96185	9.38977	2.4331	8.10758	7.69632	2.90704	8.96404	8.79342	6.16033	0.906065	6.29638	5.13612	1.29896	2.07497	1.97744	8.30558	4.09596	8.50295	3.71158	2.12332	4.20781	7.14074	4.12972
Tanzanian	7.90909	4.71678	1.88346	2.64778	6.25019	8.57466	6.01154	9.73667	6.02428	2.09824	4.22684	5.31499	6.63126	10.6933	4.81151	5.00202	9.62875	3.36248	9.61518	4.48088	5.16618	8.0107	8.26017	6.62502	7.86369	7.05605	6.20177	9.31032	2.84735	8.73048	5.56567	1.70392	8.56583	8.23892	5.43409	0.840715	5.50371	4.82758	0.79237	2.71851	1.80699	7.88827	3.57491	7.95533	3.12791	2.1896	3.96049	6.70744	3.71679
Tanzanian	9.26844	6.26584	1.69865	2.83845	6.63073	9.31727	6.12921	9.61214	6.14971	2.23153	4.75495	5.95819	7.20113	11.4423	5.748	6.05546	11.859	3.35986	10.1012	5.2106	6.29274	6.72053	9.71947	7.23383	8.96611	7.03392	7.02623	9.58316	3.9883	8.47538	5.48423	2.45434	9.6943	8.68948	8.81724	1.10648	6.04974	6.32247	1.1024	2.22376	2.22919	8.25755	4.1837	8.89136	3.36931	2.82924	3.85212	7.40313	3.93469
Tanzanian	8.50958	4.80126	1.7084	2.55436	5.67065	7.14192	5.65836	9.45445	5.41106	1.70001	3.66244	4.83277	6.46785	10.6447	4.99374	4.80654	9.83831	2.6038	9.52353	5.32703	5.33908	6.46181	7.44087	7.21645	9.46656	6.58296	5.29795	9.13606	2.01642	6.70479	5.26242	2.34617	9.36716	7.69704	5.00435	0.694535	5.56858	5.25662	0.9275	1.98293	1.87033	7.84769	3.16018	7.70378	3.11469	2.5939	2.36628	6.40662	3.55796
Tanzanian	9.01221	6.52571	2.4729	3.25442	7.15318	7.96194	7.80754	9.0717	6.40573	2.65147	4.27991	5.66226	6.89066	11.2576	4.90586	5.40913	10.0819	3.63822	9.85939	5.97823	5.93813	7.02754	8.17668	6.18664	8.61731	7.3053	6.31844	9.63315	3.18784	10.245	10.7536	2.56034	9.04912	8.47269	5.78878	0.857415	5.98006	4.52266	1.09926	2.89177	2.38176	8.46023	4.0458	9.76022	3.01581	1.99411	11.5542	7.25565	4.2119
Tanzanian	7.94806	6.2744	1.02663	2.68468	6.39554	8.68326	6.23487	9.82985	6.63593	1.76603	3.83193	5.36355	6.89912	10.621	5.38909	5.61221	10.8069	2.36593	9.62649	5.63707	5.52777	6.20223	8.1418	6.04889	6.53662	6.86372	6.05657	9.47936	2.94315	8.29041	5.83549	2.06169	8.8671	7.81487	4.78153	0.998425	5.78615	4.74826	0.87496	2.2186	1.47757	8.42954	3.36855	8.24738	2.29953	2.24486	3.84006	6.62488	4.16927
Tanzanian	8.55706	5.09732	1.32195	2.66771	7.66649	9.5137	8.00453	9.72547	6.73428	2.78194	5.08791	6.146	7.92341	11.3801	5.70742	5.74653	11.9207	3.11625	10.0156	6.24425	6.40572	6.24986	9.5371	7.51865	7.16029	7.41699	7.19215	9.34831	2.13504	9.33591	7.53928	2.82735	8.74612	8.48771	6.27232	0.847665	6.0853	6.16948	1.35843	3.51369	3.24742	8.1927	4.36456	8.93981	3.34714	1.95023	4.4615	7.19003	4.4004
Tanzanian	7.59994	5.30764	0.89643	1.61674	6.44017	9.1197	6.15534	9.84083	5.28327	2.0231	4.55837	5.53967	6.88582	10.7717	5.40575	5.7969	9.78214	4.12448	9.93058	5.34313	4.95013	6.75542	8.96987	6.22389	5.67312	5.57921	6.75892	8.94709	2.11075	7.23404	7.05133	2.13736	8.35603	8.19827	6.36378	0.798475	5.73234	5.45976	0.89346	2.158	1.72795	7.44928	3.75739	7.23559	3.04168	2.67804	3.47719	6.71727	3.78023
Tanzanian	7.46174	4.69316	1.06646	1.83708	6.36592	8.26132	6.78452	9.94507	5.01961	2.37409	3.73651	4.99144	6.7541	11.0052	5.28822	5.41277	11.1802	2.9053	9.79922	5.76266	5.59982	6.1716	8.57026	6.27696	8.49709	6.37716	6.25258	9.4352	2.06874	8.22796	6.95006	2.87616	8.71261	8.12354	7.34118	0.754715	5.6307	6.09732	1.02804	2.79695	2.26335	7.89113	3.24361	8.14996	4.45704	2.4005	3.88429	7.03137	4.00419
Tanzanian	7.72204	5.05903	1.28418	2.31114	7.53932	10.9913	7.43356	9.85285	6.81653	2.2062	4.71063	6.19475	7.32175	11.4502	5.38697	4.91322	9.84111	3.62648	9.72828	6.6407	5.6114	6.18295	8.49948	8.21853	6.94747	6.45041	7.12111	9.38357	1.96181	8.52654	5.72488	1.98327	9.03153	8.28141	3.24477	0.983285	5.97023	5.7001	1.16815	4.4565	2.61799	7.76026	3.37528	7.7728	2.67236	1.6429	3.93701	6.99275	4.07984
Tanzanian	7.25141	4.79652	0.61666	1.70771	7.0717	7.78275	8.25098	9.69448	5.59314	2.15509	4.07205	5.27269	6.95998	10.6152	4.72789	4.91287	10.2807	2.79612	9.80718	4.76444	5.94028	5.67103	8.18554	6.62083	7.14222	5.70376	7.36254	9.25999	1.15139	8.18178	5.10578	1.94677	8.64582	7.59435	5.8535	1.16383	5.8631	5.04877	0.79522	2.6598	2.11675	7.27382	3.48061	7.51295	2.84944	1.31973	3.82806	6.84748	4.12294
Tanzanian	8.24541	4.52278	1.56736	2.4974	7.44638	8.14502	7.33964	9.26178	6.82906	2.57963	4.28345	5.43631	6.75815	11.0226	5.05934	5.37352	10.1279	4.1468	9.94547	4.3321	5.02412	6.43999	8.50572	6.72348	6.45531	5.87312	6.59093	9.20244	2.4125	8.05011	6.61885	3.5503	8.85223	8.42437	6.56378	0.722415	5.45298	5.34785	0.69676	3.64201	3.79277	7.95349	3.85062	8.65879	3.71095	1.90854	4.42348	6.99355	3.86022
Tanzanian	8.25479	5.52785	1.70793	2.70969	6.49436	8.30556	6.43238	9.6404	6.23234	2.63127	3.5895	4.35201	6.64883	10.902	4.90915	5.09089	10.2782	2.18132	9.81684	4.95683	5.24976	6.75258	8.11506	5.9118	6.83622	6.32909	5.95592	9.44089	3.07782	8.34046	5.75879	1.8838	8.82392	8.17923	5.9866	1.45578	5.46995	5.18307	1.11654	2.6296	1.78896	7.37166	2.94053	7.85454	2.40211	1.9831	3.99085	6.80945	4.27851
Tanzanian	7.88061	5.98196	1.82649	2.05847	6.34138	11.442	7.23354	9.58381	5.49909	2.09213	3.76253	5.03909	6.94737	10.8605	5.50162	5.99747	9.36873	2.95101	9.85156	5.12298	5.64186	6.67664	8.5763	6.97592	7.21202	6.06745	6.03285	9.50947	2.49402	8.05044	6.20349	3.14874	8.49733	8.32176	6.11197	1.10608	5.8723	5.25516	0.8167	2.3356	1.55027	7.79299	3.29242	7.62955	2.9855	2.49081	3.67209	6.8644	4.11177
Tanzanian	8.452	5.69311	1.96682	2.24065	7.92949	8.63049	6.9113	8.59911	5.77891	2.59399	3.571	5.35616	7.19137	10.9344	5.50066	5.61505	9.95938	2.51187	9.92006	5.28796	5.54553	7.06677	8.71065	7.22149	6.82266	6.48196	6.41054	9.53016	1.96917	8.29261	4.23661	8.00722	8.58699	8.32781	7.0896	0.879605	5.7249	6.2249	0.77319	2.75021	1.56678	7.72067	2.96848	7.30495	2.93405	2.64727	3.73659	6.61862	4.17964
Tanzanian	9.19458	5.30253	1.94574	2.87159	6.87794	9.0119	7.48603	10.155	6.05704	1.77226	3.99144	5.87132	6.9174	10.8738	5.36091	5.17302	9.77937	3.00228	9.60989	5.4611	5.68544	6.85612	8.61119	7.17076	8.56711	6.75544	6.36571	9.56825	2.88496	8.83577	7.81803	2.41811	8.00731	8.44262	5.92959	5.59851	5.70998	5.05734	1.01975	3.3435	2.41147	7.90995	3.65223	8.37926	2.57752	2.91858	3.89574	6.75863	4.12231
Tanzanian	8.14369	5.85234	2.24218	2.25527	7.04191	8.55128	6.46513	8.87919	5.41293	2.24191	4.13823	5.8693	7.17486	10.8621	5.73861	5.32477	10.7561	2.15822	9.86079	5.48744	5.9225	7.98674	8.93196	6.3219	9.12062	7.46368	6.40362	9.5274	1.40026	8.2803	4.15071	6.69109	8.59022	8.15362	5.59389	1.40463	5.92445	6.33272	0.92142	2.25737	1.73914	7.9586	4.90552	7.69956	2.02325	1.86155	3.62631	6.78191	4.22008
Tanzanian	8.2675	5.8757	1.47768	2.82127	6.98451	9.77521	7.26945	9.77692	6.19538	1.95899	3.92427	5.22131	6.76766	10.6878	5.17851	5.93731	9.97057	3.50766	9.51165	5.58189	5.56624	9.36397	8.42053	6.19675	8.49267	6.7619	7.035	9.44117	2.77542	7.64388	3.69583	1.84648	8.14664	8.49376	6.44269	1.47677	5.77607	4.65128	0.96872	2.35465	2.1155	7.87817	3.32763	7.62056	2.56527	2.22028	10.5864	6.30194	3.75153
Tanzanian	8.23821	5.87861	2.31094	2.66872	6.86045	9.05355	6.91743	9.97925	5.95205	2.09932	4.80603	5.49348	6.50372	11.2578	5.56007	5.80436	8.46739	4.16486	9.5987	4.86291	5.75696	8.83651	9.1063	6.46213	9.66142	7.37666	6.81919	9.48316	1.70355	7.25969	7.99791	1.77524	9.16006	8.20288	6.67312	0.932065	6.04816	5.49123	1.15283	2.2386	2.60453	8.34217	3.58259	7.67141	2.71285	2.06209	3.5172	7.03956	3.97966
Tanzanian	8.0017	6.36773	2.08291	2.90332	7.15203	9.1403	8.09335	10.2783	5.81815	2.14845	5.46971	7.07174	7.01887	11.4095	5.6101	5.19024	10.9028	3.7447	10.2169	6.39345	5.73529	8.43824	8.64852	7.36708	9.22714	7.20489	7.5229	9.10731	2.20705	7.38556	5.43229	2.53297	8.55898	8.31174	5.91998	1.11323	6.2401	6.35219	1.45128	3.07892	2.20291	8.31942	5.63934	9.07212	3.79066	2.65225	4.81626	6.92051	3.84774
Tanzanian	8.295	6.00282	2.06406	2.71087	7.13473	9.48767	6.85431	10.0294	5.56318	2.3999	4.694	6.00432	6.67502	11.2413	5.69438	6.2222	11.3923	3.40058	9.69808	6.89286	5.31473	7.52006	8.88803	6.0907	9.32433	6.66472	6.82012	9.58328	2.35947	8.0447	6.20998	2.97369	9.3314	8.38145	5.95177	0.905345	5.66523	6.08573	1.23669	1.91348	2.54307	8.10755	4.19735	8.3291	4.09058	1.79506	3.82479	7.02409	3.70135
Tanzanian	7.64119	5.77463	1.43354	2.16603	6.68283	9.16461	6.62503	9.17558	6.04054	1.71207	3.87032	5.57949	6.73435	10.8398	5.17768	5.68206	9.8743	3.39331	9.57414	6.77796	5.26498	5.91953	8.90317	6.51812	5.95889	6.50547	7.04061	9.40625	1.52228	6.76971	3.87828	1.83983	8.67103	7.88526	6.01052	0.671575	5.56818	4.66127	0.79634	2.34008	1.85465	7.96346	3.05844	7.91995	2.29202	2.69012	3.77902	6.71047	3.90528
Tanzanian	7.92985	6.23494	2.34018	3.22282	7.35443	9.67272	6.6264	10.5433	7.09755	2.85613	4.83885	6.47436	7.44062	11.2976	5.86931	5.65048	11.7703	3.04006	10.3073	5.90788	6.0902	8.64709	9.25384	8.72659	10.715	7.8304	7.46687	9.72995	2.77189	8.69696	4.30062	2.24581	8.83294	8.5237	6.30108	0.494205	6.25603	5.47607	1.5239	1.63377	2.84007	8.13792	4.66857	8.90676	3.29379	2.17809	3.61658	7.22523	4.12049
Tanzanian	8.55682	6.05579	2.74573	2.62102	6.40415	8.71824	6.43807	9.28206	6.08706	2.33014	4.14356	5.6883	6.87579	11.0972	5.41139	5.21633	10.264	3.25187	9.9075	4.77002	5.78706	8.95949	9.61437	8.63673	8.91789	6.88636	7.78034	9.25595	2.40693	7.79575	4.14885	6.59166	8.69478	8.24361	7.14466	0.991425	5.7926	5.79343	2.07291	2.62678	1.86315	7.86764	3.73963	7.99454	2.64845	2.70312	3.53618	7.05999	3.83711
Tanzanian	8.97203	5.3602	2.0299	3.4461	6.464	7.59063	5.86371	9.09707	6.23895	1.4134	4.00089	5.89998	6.97354	10.5382	5.1093	5.55417	9.41657	2.40844	9.4646	5.71788	5.82124	6.41059	8.59668	6.89332	7.35651	6.51616	7.25246	9.32128	3.52852	7.96105	5.22137	1.95806	8.54608	7.81016	6.25319	6.4082	5.66083	4.10428	0.71831	1.56419	1.56654	7.89436	3.60519	9.15523	2.32328	1.88643	3.12987	6.62725	3.95085
Tanzanian	8.60172	5.83024	2.54012	2.87466	6.63471	8.17672	6.05724	9.62799	6.47044	2.13913	4.4295	5.55844	7.16828	11.3514	5.33471	5.44402	10.5269	3.98773	9.72555	5.6503	5.98835	8.42478	8.07029	6.73565	9.12618	7.89673	6.38579	9.65774	2.38728	9.56044	6.73692	2.28755	8.73029	8.22035	5.91413	1.88329	5.91979	5.1342	1.1679	1.87137	1.70656	7.77857	3.22688	8.33507	2.54787	2.74035	3.23911	7.05663	4.1196
Tanzanian	7.87859	5.61634	2.08421	2.37378	6.86935	9.20201	6.71613	9.76046	5.92072	2.19901	4.55417	5.22813	6.67354	10.9143	5.79956	5.92502	9.04477	2.52576	9.9957	5.29252	6.10566	7.91993	9.09646	7.12325	9.34278	7.71774	7.14534	9.41088	1.95708	7.71129	5.4418	2.80889	8.48948	8.16843	6.99788	1.14128	5.99833	6.14386	1.06288	2.33303	1.91847	8.15313	4.70639	8.60911	3.02941	2.86442	4.05981	6.7756	4.18107
Tanzanian	9.07442	5.40109	2.42014	3.01348	6.91603	7.918	5.46348	10.3243	6.94555	2.41341	4.41817	5.60144	7.34136	11.273	5.41478	5.36123	11.0894	3.04318	9.85169	5.3774	6.14312	7.21225	7.59027	6.78549	8.04777	7.15168	6.08308	9.56747	3.50631	9.1904	6.96298	2.06641	8.34483	8.28958	5.26168	0.664775	6.18011	5.02177	1.22445	1.87356	2.52717	7.7944	3.78274	9.50198	2.35046	1.96806	4.16095	7.16571	4.24447
Tanzanian	8.3842	5.17525	2.35455	2.52314	7.12866	8.75079	6.42893	9.51585	5.42589	2.39681	3.432	4.96868	6.95234	11.0946	5.57476	5.64822	9.019	2.3636	9.96563	5.16772	5.66889	6.11114	8.62119	6.34464	6.83498	6.22698	6.40388	9.58035	1.76019	9.1205	4.68465	2.10371	9.16601	7.82018	6.09881	0.537655	5.68156	5.70953	0.59512	2.24688	2.06034	7.68384	3.43065	7.49709	3.6524	2.0256	3.18499	6.95995	4.03197
Tanzanian	7.50608	5.67673	1.75922	2.05076	6.03415	9.08409	7.24786	9.61562	5.6753	2.29227	4.77541	6.01586	7.11645	10.4567	5.19678	5.54734	9.50605	3.35532	9.89458	5.6029	5.77685	7.25167	10.618	8.4241	9.14763	6.32618	7.0663	9.35319	1.48571	7.31876	4.53514	3.19375	8.76666	7.78192	11.911	1.91088	5.65878	5.55082	1.21383	2.30568	1.52341	7.72553	3.49794	7.28695	3.56711	1.95555	3.57132	6.89313	3.8033
Tanzanian	8.82419	5.96028	1.97959	2.81012	6.58031	12.0446	6.70937	10.0246	6.34258	1.86704	4.01408	6.0565	7.41351	11.621	5.49867	5.7728	9.81118	3.40477	9.96698	5.30891	6.00016	6.67392	9.02452	6.06891	8.22922	6.88717	7.2992	9.78654	3.27962	7.97037	5.6898	2.58049	8.53608	8.51874	4.73269	0.657185	6.08294	5.14945	1.10207	2.78477	2.14233	7.8992	3.35089	8.75221	2.78994	2.73592	3.52342	6.96432	4.08166
Tanzanian	8.86955	6.19093	1.99674	2.82697	5.66823	8.55373	7.00151	9.36007	5.46174	2.0515	7.32941	5.91254	7.46006	10.9019	5.4043	5.52947	9.99171	2.24799	9.85894	5.24792	6.09508	7.14246	8.5494	7.64786	8.54403	7.03564	6.1436	9.70686	2.368	8.00111	6.03502	2.0347	8.71083	8.1985	6.34225	0.585485	5.89091	5.64234	1.11476	3.43849	1.44735	7.91201	3.13105	8.01503	3.2551	2.11107	4.44385	7.13919	4.06641
Tanzanian	8.41234	5.08993	2.33997	3.00929	6.77075	8.12871	6.52145	9.08235	5.76635	1.78417	4.35006	5.47713	7.13734	11.2516	5.18876	5.40254	10.2664	2.1833	9.85642	5.31759	5.99813	7.09272	8.66776	6.92416	7.92708	6.96847	6.47713	9.42269	2.34102	7.28421	6.41214	2.43581	8.68043	8.20908	5.96353	1.2951	5.925	5.21824	1.23575	2.26899	1.64853	7.9033	3.31105	7.87326	2.97873	1.94543	3.72277	6.83052	3.65385
Tanzanian	6.92171	5.64192	1.5442	1.85322	6.72398	8.74127	6.52349	9.58943	6.60951	1.85148	3.75377	5.15161	6.86677	10.8859	5.01658	5.55373	8.87158	4.30912	9.65659	5.6346	5.68221	6.08512	8.55918	5.82482	6.91627	6.67026	7.81994	9.48527	0.996455	9.78209	6.8488	1.72656	9.38345	8.17634	7.68746	0.638735	5.91538	5.15224	1.29174	2.32841	1.5075	8.43181	3.54608	7.50162	2.90273	4.32943	3.29902	6.51954	3.89309
Tanzanian	8.88595	6.3593	1.62292	2.58807	6.0265	8.97587	6.19369	9.58368	6.04294	1.75215	4.67504	5.16198	7.615	11.1636	5.75174	5.79889	9.94385	3.96548	9.98375	5.31192	6.09528	6.1628	9.40716	6.68983	8.07894	6.66216	6.78338	9.55355	2.44101	9.81289	4.06184	3.19329	9.18132	8.39926	6.01082	0.501415	6.2564	5.66155	0.86217	1.937	1.82113	8.36268	3.63006	8.9108	4.10454	1.98068	3.61515	7.06959	3.83595
Tanzanian	9.50126	5.70587	1.92807	2.92407	6.71119	8.81002	6.61595	9.6295	7.1536	2.52592	6.57575	5.60039	7.01584	11.072	5.37584	5.35508	8.78987	3.95668	9.63213	5.73505	5.56002	6.76549	8.23208	7.0866	7.34572	5.91035	6.75681	9.5467	3.52793	9.97252	7.71366	2.54824	9.45103	8.45099	7.3994	0.865275	5.88659	4.34645	0.84096	2.52993	2.37763	8.34879	3.83692	8.47795	2.90443	1.92669	3.78667	6.95273	4.08239
Tanzanian	8.53683	6.34363	1.61964	3.19716	6.85215	8.7928	6.30456	10.2695	6.9871	2.02758	4.01947	5.44294	7.09455	11.3604	5.37526	5.02288	9.90996	3.55483	9.86024	5.66276	5.56289	6.0685	8.07577	6.67963	7.76541	6.41099	7.08308	9.38885	3.64349	9.53603	4.52845	1.80415	9.63115	8.59027	4.99045	1.11833	5.84518	4.62066	1.1908	1.98105	1.64766	8.13754	4.10909	8.77687	3.2586	1.94184	3.83823	7.16439	3.83828
Tanzanian	7.82022	7.17206	1.7472	2.39511	6.63608	9.55748	6.6801	9.31509	7.03564	1.62879	7.43945	6.02445	7.37147	11.3602	6.08292	6.12368	8.91061	3.06203	9.87992	5.57447	5.5569	6.21579	8.82261	6.22616	7.24435	6.32357	6.34417	9.69978	2.30673	9.62477	6.35131	2.22852	8.82589	8.66422	5.96891	0.766235	6.32207	5.58444	0.93602	1.78583	1.26843	8.0021	4.05443	8.73493	2.53078	2.10877	3.69	7.01511	4.05575
Tanzanian	7.42793	5.79845	1.72482	2.14816	7.61039	7.77592	7.26075	8.84197	6.23194	2.41722	3.86449	5.03416	6.9968	11.0987	4.9199	5.58624	9.62497	3.05333	9.66758	5.80381	5.59568	6.76452	8.35948	7.02977	6.90902	6.70685	6.33692	9.49591	1.89481	6.90848	5.76135	2.17218	8.71692	8.09596	5.46725	0.890635	5.33042	4.89694	0.56119	2.11468	2.16602	7.77687	3.40053	7.72495	2.73392	1.72207	3.75762	6.89403	4.20012
Tanzanian	8.89222	5.7237	1.98823	3.02987	6.79892	8.71649	5.95786	9.83351	5.1371	1.88271	3.97696	6.24336	6.73901	10.9365	5.97478	6.0267	10.1897	2.81225	9.87812	6.08843	5.82883	6.49733	7.93641	5.94964	6.73334	6.7081	6.16861	9.58688	3.3188	7.36414	7.11241	2.27319	8.35468	8.13238	5.70491	0.804315	6.36649	6.00012	1.19387	3.21312	2.06812	7.87774	3.92867	8.22903	4.67969	2.18941	3.34946	6.68686	4.07829
Tanzanian	7.66807	5.63826	2.21573	2.52437	7.16368	8.6691	5.81577	9.51538	6.87481	2.10954	4.50211	5.67701	6.92525	11.2486	5.38012	5.22443	9.7719	3.4591	9.8104	6.38155	5.91214	6.95932	8.10165	6.02515	8.34843	6.62437	7.31972	9.51507	2.51695	8.97757	7.90063	2.05559	8.81791	7.92346	6.69603	0.952735	6.41749	4.92509	1.2302	1.82881	2.02687	7.98441	4.95653	8.03289	2.84672	2.09413	3.77559	6.89485	4.07795
Tanzanian	8.72513	5.97129	1.50097	2.94253	6.83448	9.57037	7.31949	9.26406	6.26492	1.56988	4.62259	6.809	7.04374	10.8512	5.30116	5.05931	10.1959	3.73466	9.98588	5.43503	5.20992	5.82505	10.0689	7.68073	6.62849	6.8899	9.49784	9.00527	2.24261	6.13406	5.93989	1.59867	8.60693	8.18634	7.26114	0.596635	6.1052	6.18853	1.31002	2.13439	2.14973	8.15857	4.68686	8.82492	3.76292	1.9563	4.30651	6.99076	4.19356
Tanzanian	8.50507	6.56332	2.68886	3.13518	7.19946	9.11557	6.83998	9.26801	7.28697	2.00442	7.79	6.7954	7.47385	11.1899	5.51379	6.01734	11.0349	3.22168	9.87275	5.28766	5.23058	7.27543	8.94208	6.43993	8.93074	7.14126	6.6346	9.68511	3.04997	8.94158	6.33732	1.95036	9.53513	8.51966	5.71217	1.04954	6.13408	5.77213	1.25957	2.52127	1.83059	8.81221	3.84097	9.2493	3.06453	3.59151	3.71094	7.09171	4.16806
Tanzanian	8.76098	5.19233	2.25786	3.0881	7.64527	9.62744	7.14539	9.82504	6.49298	2.31921	4.42042	5.13115	7.23759	11.3919	5.93329	6.37481	10.8294	4.88073	10.2667	5.02181	5.95611	7.90548	9.14742	6.82289	9.66962	7.28433	6.75234	9.74644	2.93343	8.31278	6.84552	1.92334	9.23148	8.7984	5.8298	0.948765	6.19212	6.20873	1.20253	1.94979	1.92301	8.74973	3.62055	9.13715	3.74324	2.34209	3.85616	7.42255	4.36673
Tanzanian	8.10132	5.98613	1.30801	2.86494	6.59652	7.89325	5.67851	10.1926	6.01849	1.83321	3.44929	4.87207	7.27517	10.6888	5.32798	5.79525	9.80639	3.34734	9.54247	4.4308	5.46817	5.26	7.60114	6.01874	6.01717	5.83646	5.90093	9.4689	2.48495	7.34349	5.50471	2.11488	8.26203	7.79632	5.25059	0.617995	5.912	4.97297	0.92159	1.99534	1.33027	7.28559	3.15907	8.82508	1.96532	1.86457	2.81892	6.55678	4.06191
Tanzanian	8.22006	5.2862	1.26867	2.8341	7.32016	10.0895	7.50644	10.1057	6.71035	1.99883	5.66955	7.49507	7.52976	11.3424	5.45412	5.5801	11.9167	2.5533	10.3002	5.92278	6.09439	9.02951	11.7791	9.59246	8.22587	6.60816	11.9141	9.72895	2.70207	8.30606	6.13664	1.95358	8.85633	8.6483	11.0551	0.926255	6.25464	6.15053	1.05337	2.11172	2.33745	8.17667	5.03681	9.00219	3.18481	1.77934	4.87923	7.08078	4.04077
Tanzanian	8.9679	5.8488	2.03656	3.7192	6.44906	9.08226	6.43065	9.983	6.05351	1.87577	4.51954	5.62375	6.97765	10.7759	5.46238	5.71723	9.66923	3.00914	9.9766	4.77876	5.49328	6.53324	8.68916	7.32645	6.90351	6.16544	6.34886	9.46032	3.92328	7.19365	5.60794	1.57804	9.03612	9.04222	6.15719	1.31408	6.01731	5.41453	0.72785	1.83493	1.60556	8.19618	3.56418	10.1048	3.28401	2.13464	2.99589	7.10379	3.78219
Tanzanian	8.65974	6.50155	4.04026	4.18546	7.60543	7.94337	6.62236	10.2381	5.18098	1.44856	4.14365	5.82859	7.10481	11.2721	5.21313	5.05173	9.33943	3.18039	9.59404	5.64131	5.84922	10.1984	8.00416	8.54841	12.0241	8.77057	5.68682	9.30133	1.61224	8.14691	6.36191	1.9866	9.15539	8.16766	5.53436	2.17625	5.92558	4.71748	1.27515	1.59112	1.42173	8.008	3.93446	8.42719	2.0814	3.00395	3.41911	7.08692	4.65855
Tanzanian	9.23015	6.2379	4.6737	4.28921	6.12088	9.2546	6.11393	8.62693	5.94135	1.89411	3.77187	5.46047	6.96702	11.0959	5.24424	5.5343	10.1571	2.32484	9.89245	5.07098	5.53522	10.9616	8.56743	9.24863	11.8422	9.64394	5.83641	9.69135	3.38734	7.33085	6.5672	1.87618	8.52117	7.87342	6.53903	1.06004	5.64628	5.61189	0.95313	2.07782	0.979295	7.47442	3.28313	7.60403	2.65474	4.29107	3.88577	7.36498	3.88775
Tanzanian	9.1075	5.87336	4.25121	4.12643	6.22653	10.5052	7.24888	9.65661	5.38842	1.9204	11.186	6.03787	7.01789	11.3231	5.33935	5.39635	9.91423	3.02001	9.62358	5.32754	5.34069	10.9201	8.43401	7.61448	11.1603	8.97125	6.22	9.63699	2.35724	8.86615	6.3004	1.85278	7.87474	7.98257	6.44953	1.67315	5.59882	5.35747	1.31274	2.46877	2.46694	7.81991	3.55428	8.07217	2.28667	3.09993	3.9379	7.00495	3.72785
Tanzanian	9.02762	5.7168	5.24845	3.45191	7.2939	8.97485	7.02183	9.62002	6.03407	1.7915	4.19766	6.08514	7.00039	11.5158	5.68611	5.95517	11.3144	4.45465	10.0736	5.57889	6.08278	10.032	10.2001	9.82019	11.1287	9.45257	7.24463	9.42676	1.83953	10.2723	12.0321	2.36808	9.93024	8.26678	6.48756	0.723985	6.12843	6.70057	1.05581	2.34717	1.54825	7.82988	4.02219	7.97126	3.55886	3.82009	4.35562	7.50828	4.061
Tanzanian	7.63326	5.43412	2.6025	2.68679	6.03969	8.514	5.9181	9.11828	5.45681	1.66606	3.83116	5.35783	7.19036	10.7511	5.61105	5.69825	10.5816	2.42774	9.87983	5.32229	5.60882	8.45303	8.89585	7.84569	9.74825	7.17837	6.21774	9.17319	2.3771	6.59086	4.78089	2.58426	8.8355	7.86133	5.70436	1.08814	6.23224	5.53934	1.02651	2.74137	2.01422	8.18579	3.25511	8.70861	3.02257	2.3447	3.48607	6.93274	3.73236
Tanzanian	7.72307	5.75209	2.87933	2.69925	6.46793	8.45964	6.96917	9.18478	5.52053	1.86382	3.76648	5.0899	7.11228	11.0683	5.36674	5.78214	9.35398	3.27994	9.67303	5.6842	5.6831	8.98251	8.14679	6.98981	10.5394	8.07348	5.51867	9.72103	2.84231	7.88399	6.44109	1.83865	9.24136	8.37321	5.34663	0.441335	6.04857	5.2888	0.98145	1.88694	1.77235	8.71498	3.28699	8.37367	3.06258	2.37146	3.69032	6.94806	3.86703
Tanzanian	7.79132	5.35034	2.91846	2.53614	6.74879	8.60151	6.26234	10.4556	6.4695	1.7617	4.16082	5.69135	6.94435	10.8644	5.1811	5.52736	10.532	2.06386	9.66543	6.26667	5.78441	9.00984	8.32296	8.37606	10.8906	8.02843	6.15803	9.81343	1.24775	8.2357	6.52265	2.28914	8.45079	7.94981	4.62853	0.764765	5.74521	4.43659	0.77917	1.77594	1.75754	7.99585	3.38381	7.45615	1.95856	2.17752	3.41664	6.83206	3.95159
Tanzanian	6.92415	6.08036	2.9093	2.70805	6.76426	7.72154	6.32875	10.2092	5.76189	1.65354	4.49416	5.60832	7.05778	10.9179	5.32351	5.02182	9.85526	3.63863	9.61019	4.78746	5.31202	6.98529	7.97639	6.90642	8.71767	6.58455	6.52693	9.47427	1.89819	8.44421	4.14386	2.01564	8.79974	7.95238	5.05402	0.775145	5.60283	4.52187	1.17879	1.38824	1.4896	7.64449	3.39177	7.83362	2.27659	2.65836	3.11686	6.81278	3.9998
Tanzanian	8.2926	6.00446	3.52334	3.85144	7.05532	8.53379	6.53871	10.3476	6.04038	2.00973	9.26911	5.97258	7.30239	11.6877	5.44964	6.17666	9.94337	4.1414	10.0878	6.15243	5.85991	9.24939	8.82829	7.44617	12.3737	9.15886	6.84189	9.5503	3.06703	9.14626	3.29739	2.50325	9.15334	8.59112	7.13623	1.02269	6.01896	5.77552	1.29594	2.51571	1.99494	8.49666	3.44788	7.80663	4.36608	2.75664	3.85789	7.2131	3.74448
Tanzanian	7.26497	5.73909	2.943	2.70592	7.2564	8.26834	6.33318	10.2686	6.55255	2.26989	4.22093	5.52222	6.98681	11.3156	5.42522	5.66413	10.1563	3.17998	9.70197	5.80078	5.80933	7.76976	8.64627	7.84577	8.50811	7.58491	8.05031	9.78569	1.47818	8.28539	5.49169	1.93254	9.47959	7.82902	7.08227	0.837025	5.79507	6.54479	1.18418	1.90423	1.94329	7.63118	3.58055	8.85493	2.67964	2.54781	3.24336	6.75565	4.15622
Tanzanian	7.16298	5.51128	2.27095	2.352	6.56935	8.87696	6.29133	9.8062	5.50563	2.02981	4.43795	5.72823	7.17311	11.3873	5.40759	5.75049	8.31391	3.4857	10.0304	6.08585	6.04497	8.12763	9.01209	7.57451	9.66454	7.40775	6.59983	9.50922	1.84065	7.41864	7.02794	2.35757	9.551	8.65394	5.79401	0.776925	6.00718	5.52823	0.85221	2.10873	2.00093	8.07544	3.81038	8.67502	3.35048	2.30909	3.46515	7.008	4.23733
Tanzanian	7.44261	5.93102	2.31852	2.31142	6.52167	10.6832	6.00058	9.20758	5.68647	2.21562	4.20873	5.53977	7.15922	11.2198	5.42607	5.18107	11.5224	3.00534	10.0802	6.1045	5.77454	8.3023	8.44093	6.83067	8.43722	7.32627	5.98088	9.56173	2.22818	7.83707	6.91802	2.68744	9.68477	8.18649	5.54586	1.06438	6.26666	5.34687	1.08293	2.00301	1.80299	7.95783	3.7437	8.05715	3.09485	2.03638	3.3296	7.03615	4.13933
Tanzanian	8.03219	5.20915	2.63225	3.20884	6.68515	10.6899	7.79011	9.85769	5.71675	2.19067	4.27952	6.41057	6.75759	11.3386	4.9053	5.02721	9.44434	2.98956	9.8585	5.13384	5.66953	8.42845	8.30541	7.25824	8.95893	7.47584	5.93311	9.48546	2.63182	7.16737	4.52214	2.31033	9.12364	8.47901	5.50352	0.597245	5.92892	5.05483	0.88762	2.27652	2.1689	7.96963	3.25664	7.71077	4.17232	2.68092	3.52868	7.19662	3.78635
Tanzanian	8.08487	6.99465	2.39143	2.32267	7.3839	10.089	6.88183	9.83008	7.23142	2.65166	4.44681	6.36135	7.27207	11.2482	5.54488	5.53489	10.4868	3.44428	9.90774	5.9686	5.84384	8.04706	8.54034	7.48797	10.1984	8.02457	7.4459	9.52777	1.87603	8.20871	5.956	2.3085	9.45481	8.5921	5.68081	0.817055	6.21101	5.6628	1.30105	2.75282	2.40765	8.08352	3.72904	8.35667	3.46385	2.70966	4.41609	7.3404	4.04186
Tanzanian	8.00909	5.58265	2.45309	2.78966	5.99333	8.24481	6.64065	9.5366	5.92457	1.33151	4.32899	5.50654	6.84906	11.0996	5.18552	5.06443	8.56171	3.22214	9.9349	4.77566	5.6699	7.16219	9.31613	7.41519	8.39025	6.50887	6.53493	9.01418	3.42062	7.36372	5.71579	2.25338	9.33633	8.1137	7.98592	0.760745	6.06454	5.41127	0.72379	2.12963	1.97171	8.77734	3.01148	8.69406	4.31353	2.30932	3.05659	7.07317	3.91903
Tanzanian	7.78754	5.88124	2.34802	3.81433	6.87539	8.58774	7.27194	9.35669	6.75518	2.15588	3.62128	5.11782	6.77442	11.1568	5.11757	5.44984	9.16701	3.13736	9.89174	4.63514	5.41627	7.01605	8.18192	6.30017	9.80579	7.10172	6.32163	9.59531	2.79936	8.19312	5.05348	1.75503	8.89845	8.18346	5.11423	0.431965	5.80687	4.75326	1.08002	2.74312	1.92361	7.63504	5.27674	7.2226	2.91868	2.07677	3.88207	7.04901	3.82668
Tanzanian	6.36404	5.64727	1.40469	1.5944	6.88482	8.0938	5.97657	9.52655	5.51818	1.93949	6.66235	5.28179	7.01657	10.5804	5.00494	5.66439	10.1709	2.03544	9.73359	4.95864	5.78164	7.46706	7.43745	6.91531	9.20794	7.47769	5.72034	9.28027	1.29065	8.43407	6.64199	1.7633	8.85615	7.57405	5.32887	1.02432	5.78217	5.27616	0.8544	1.952	1.24708	7.87021	3.12115	7.4966	2.20595	2.18626	3.92338	6.45995	4.07395
Tanzanian	8.75053	5.67016	2.02524	2.24443	6.98168	8.67062	7.13323	9.86722	6.62953	2.69693	4.7695	5.99327	7.01598	11.3141	5.75318	6.12108	9.87171	3.15468	10.0106	5.30586	6.07116	10.1392	8.93048	7.82624	11.0583	9.62977	6.7035	9.40096	1.97426	9.21383	6.64687	2.832	9.54322	8.66875	6.8049	1.18029	6.33211	5.96204	1.26703	2.73011	2.35747	8.10842	3.37954	7.77055	4.57308	2.78582	4.78385	7.76807	4.28391
Tanzanian	7.18189	5.96819	2.23434	2.57049	7.10794	8.62969	6.26237	10.34	7.24481	2.44908	4.96249	6.21309	7.35794	11.5507	5.48069	5.41005	9.73757	3.9695	10.4258	5.65832	5.89372	7.78632	9.13566	8.14784	10.2239	7.14886	7.07636	9.39407	1.89766	9.49184	3.90697	2.10161	9.05687	8.40461	5.23458	0.961555	5.85123	5.81731	1.27876	2.1501	2.162	8.15642	4.03507	8.56954	3.80979	2.50408	3.79748	7.56848	4.24273
Tanzanian	7.68447	5.18642	2.36361	3.00665	7.36644	8.21223	7.5721	10.3127	6.38551	1.91088	4.37943	5.6929	7.39782	11.1422	5.39347	5.50389	10.4591	4.1277	9.84888	5.62051	5.88936	8.28745	8.65379	7.65321	10.3916	7.6491	7.00685	9.82124	2.08132	8.28693	7.41791	2.4934	9.13369	8.20331	6.14978	4.8003	6.44053	4.54725	1.24173	2.22653	1.99456	7.69029	4.66427	8.82915	3.1543	2.55741	3.494	7.61801	4.29627
Tanzanian	6.56886	5.31461	1.70053	2.14062	7.63778	8.55259	8.96314	9.64109	7.042	2.35028	4.34553	5.93091	6.95237	11.4604	5.29517	5.41964	9.07745	3.56715	10.006	5.2354	6.01149	8.84695	8.71061	7.75086	11.3114	7.89722	6.50596	9.30503	1.82017	10.0356	6.40237	2.7022	9.46137	8.64888	5.69332	0.753275	6.10206	5.18541	1.24182	2.72575	2.02619	8.18574	7.18806	7.70256	4.10128	2.28068	4.40576	6.99721	3.91909
Tanzanian	6.77262	6.07566	1.9287	1.96354	6.70168	8.08332	6.18264	9.58977	6.41397	2.12284	4.12449	5.99829	6.6716	10.9841	5.1404	5.08786	10.2308	2.7355	9.63843	6.32802	5.75195	7.55833	7.80465	7.88927	7.89597	7.50633	6.26609	9.51156	1.59254	8.08155	6.51161	1.83112	9.1009	7.98166	6.03882	1.40833	5.51189	3.89611	0.70845	1.61269	1.51456	8.61827	3.08874	8.00629	2.49738	1.94773	3.07528	6.46124	4.07904
Tanzanian	7.39168	5.60825	2.4857	2.52688	6.90385	8.99893	6.27399	10.0843	5.89672	1.74549	3.8117	5.59764	7.21781	10.7708	5.98291	5.63525	10.6675	3.2359	10.1139	5.2517	5.90301	8.34455	8.73969	7.11343	8.50446	7.04404	6.32925	9.59758	2.27867	7.70312	6.10759	1.83133	8.72183	8.29761	6.25158	1.22342	5.49305	5.5546	0.882	1.82719	1.39637	7.9962	3.18831	8.807	3.58061	2.39107	5.75217	7.11303	4.42088
Tanzanian	7.8408	5.79884	1.60134	2.34853	7.27752	8.87583	8.68856	9.45107	6.7599	2.91871	3.5416	4.88382	7.18693	11.2822	5.12371	5.58181	10.093	2.42435	9.87876	4.75936	6.27683	7.33864	8.35569	6.89205	7.90799	7.28278	6.42715	9.13657	1.76686	8.2493	6.59391	2.42576	8.57856	7.95381	5.82911	0.553235	6.06698	5.18963	1.22371	4.24976	4.56562	7.73086	3.64848	8.22598	5.67298	1.73511	3.9249	7.1509	4.03209
Tanzanian	7.83357	5.88502	2.63903	2.91286	6.84595	8.83742	6.25042	9.63425	5.6989	1.96636	4.10473	5.40648	7.28624	10.9896	5.45982	5.10292	11.2937	3.65983	10.0283	5.59855	6.21827	9.20383	8.67632	7.37272	10.3898	8.30123	6.20017	9.33494	1.84183	7.82228	6.46425	2.13634	9.1311	8.1266	5.18196	1.16275	6.18999	5.6162	1.15144	2.12243	1.57756	8.02606	3.16411	8.21702	3.30247	3.65405	3.53594	7.12833	4.03741
Tanzanian	8.32415	5.62021	3.32878	3.97129	6.92335	9.3506	6.83194	9.76688	6.76183	2.26713	3.55934	5.51499	7.43684	11.1462	5.53556	5.78643	10.8797	2.88517	9.91019	4.95458	5.92734	9.88002	9.29119	10.8336	10.1746	8.48663	7.83049	9.41182	2.05896	7.43982	4.95717	2.17828	9.4872	8.09048	8.07954	0.813885	5.96223	6.23475	0.99928	2.35648	2.08064	7.70317	3.50248	8.1371	3.52753	2.83196	4.67501	7.52147	3.98028
Tanzanian	8.43747	5.55718	4.90944	3.81633	7.1377	8.93986	7.64278	8.78061	5.65615	2.76614	5.14999	6.37802	5.9262	11.4965	5.2664	5.67178	10.8271	2.83218	10.0642	4.83742	5.13428	10.5339	11.032	9.13015	12.3309	8.9382	7.90677	9.42868	2.1218	7.12404	7.29923	8.05265	9.28278	8.75343	7.21644	0.960965	5.94041	6.65461	1.18067	10.7498	4.42483	8.75136	4.42291	8.66122	5.30375	4.0979	4.84318	6.59103	4.17436
Tanzanian	8.44694	6.13122	3.67677	3.36161	6.95712	8.41384	6.15637	9.99803	6.42298	1.92523	9.63648	6.50617	6.93477	11.329	5.30783	5.35443	9.78477	2.86128	9.74806	6.06728	5.49712	9.76078	8.52707	7.76519	12.032	8.25755	7.50931	9.50816	3.89201	7.75138	9.77208	2.05702	8.99034	8.17476	5.71942	1.07784	5.9261	5.44093	1.11819	1.89632	1.71027	8.01824	3.98021	8.81256	2.77501	2.99948	4.2156	6.94046	4.01113
Tanzanian	8.72973	5.56933	4.3872	3.44408	6.6679	8.23015	6.38416	9.70668	5.88347	2.65608	3.88094	5.73184	6.60618	11.0378	5.12004	4.91831	10.92	1.83737	9.70568	5.2397	5.77631	9.63348	8.03802	6.73352	12.7516	8.66409	6.34596	9.69146	2.41386	7.8426	6.56538	2.16025	8.68792	8.18231	5.59211	0.916155	5.69778	5.00058	0.85858	2.68282	1.91958	7.63574	3.58342	7.50078	1.93958	2.63733	3.72183	7.15062	3.96423
Tanzanian	7.38483	5.37986	4.06643	3.07802	5.86077	7.5675	5.75233	9.15849	6.55419	2.51283	4.00645	5.33024	6.85156	11.0361	5.07044	5.05887	9.87814	2.98052	10.3921	4.19106	5.17211	8.99398	8.17863	8.29328	10.7899	8.97621	5.53782	9.23656	2.55965	9.31367	4.46953	2.38506	8.59707	8.54967	5.95009	0.656075	5.71948	4.73898	0.7764	2.11276	1.57952	7.84919	3.3374	7.65287	3.54131	2.99716	3.79688	7.34877	4.37614
Tanzanian	7.86512	6.05239	1.55009	2.45534	7.40914	8.24033	6.17142	9.43273	6.25884	2.41373	3.72395	4.75293	7.1353	11.1495	5.08444	5.09014	9.84048	3.56551	9.74744	6.15416	5.42789	7.49861	8.54483	6.8213	8.17182	7.24094	6.7816	9.64629	2.25251	9.01238	6.59066	2.30294	8.63715	8.13461	4.72439	0.989365	6.06355	5.04474	0.82545	4.08476	1.97608	7.48269	3.23382	8.03612	2.65739	3.45728	3.49138	6.87019	4.05626
Tanzanian	8.55339	5.70751	1.65644	2.56327	6.97674	8.69105	7.05557	9.72969	6.39349	2.73838	4.22865	5.54481	7.40319	11.1841	5.79145	6.06642	9.55804	3.41223	10.0018	5.71413	6.15592	6.46223	9.31877	6.60277	8.82161	7.15055	6.77376	9.62135	1.48889	9.07616	5.74051	2.22379	8.99493	8.19787	6.86949	0.976205	6.50436	6.13739	0.95189	3.27211	2.02942	8.04924	3.78037	8.27022	2.85452	1.78211	3.32698	7.33671	4.197
Tanzanian	8.10116	5.53191	1.6857	2.31835	6.51828	7.72014	6.56441	9.02945	6.10843	1.58198	8.02659	5.74409	7.02682	10.974	4.9561	5.21579	10.1497	2.96066	9.48303	5.5066	5.60514	6.72009	8.54284	6.31434	8.33164	7.39191	6.61224	9.39885	1.94907	9.3138	10.1861	2.59531	9.22569	8.04964	6.17281	1.02391	5.56586	3.98618	0.74297	1.79424	1.6763	7.57363	3.75577	7.81818	3.1877	1.71405	3.14174	6.49599	3.76463
Tanzanian	8.32329	5.74697	1.78546	2.74918	7.31032	8.90799	6.88346	9.28059	6.92467	2.11303	4.46084	5.96124	6.42681	11.2389	5.16811	5.98782	5.62995	2.42889	9.71238	5.29773	5.46569	8.14198	9.20808	7.24417	9.23128	6.97422	7.5584	9.38507	2.75481	8.34674	8.36552	2.4655	9.31803	8.42737	7.06055	1.3412	5.7424	5.61294	0.84505	2.21392	2.0451	7.88009	3.33101	8.65406	2.67531	2.01719	3.23344	6.45427	3.68902
Tanzanian	7.84429	6.03181	2.65863	2.51858	7.0303	7.95061	8.37864	9.47269	7.16244	2.10854	3.8621	5.28158	6.66171	11.3146	4.88479	4.76551	9.767	3.06481	9.64636	5.02659	5.46884	7.66723	8.55784	6.77503	11.3744	7.06224	6.43844	9.45023	1.52934	8.05405	8.33773	2.05231	9.35662	8.59438	5.69913	0.796045	5.54774	4.65086	0.72887	3.99371	1.53143	7.87094	3.53714	8.13233	2.68654	2.33574	3.60782	6.95244	4.19703
Tanzanian	7.83889	5.94907	2.04408	2.3929	7.42036	8.74587	6.548	9.55391	6.25204	2.12862	4.08976	4.98837	7.19354	11.3129	5.25054	6.3064	9.52547	4.97628	9.95038	6.52605	5.36876	7.6536	8.33475	6.40116	8.71443	6.5626	6.34225	9.4154	2.02399	8.76121	8.9527	2.67763	9.23695	8.85309	6.07738	0.889315	6.22156	5.54125	1.00273	2.28507	1.68039	7.91894	3.31557	8.2749	3.13916	2.19444	3.68261	7.16627	4.16105
Tanzanian	7.8312	4.6609	1.31943	2.15776	7.10557	8.50477	6.02793	9.92474	5.20841	2.86553	4.54235	5.43586	7.20554	10.7922	5.11969	5.32341	10.2181	3.62532	9.85489	6.1673	5.29657	6.12212	8.74262	7.6285	8.37827	6.39414	6.79648	9.60308	1.7567	8.71431	7.7085	2.75217	8.93665	8.12369	6.65902	1.20497	6.05764	5.14072	0.91957	1.97971	1.85872	7.65907	3.57918	8.26794	3.26897	1.84736	9.4068	6.71694	4.09334
Tanzanian	8.03346	5.42282	2.58941	3.12473	7.23466	9.29541	7.33892	10.3131	6.51145	1.84553	5.39808	5.95906	7.19316	11.7739	5.33438	5.58552	11.192	3.39576	10.1526	4.98809	5.7188	8.0777	9.51713	7.95746	10.0282	6.76107	7.22626	9.14563	2.86659	9.14719	6.38506	2.13197	9.34657	8.63201	6.79277	1.11193	5.90555	5.7977	1.33753	2.11167	1.37921	8.58682	4.11489	8.97321	5.02395	2.54933	3.96408	7.33258	4.22801
Tanzanian	7.62566	5.92938	2.60259	3.097	6.78495	7.92377	5.78232	9.72649	6.27097	1.67277	4.28711	5.16435	7.18283	11.1756	5.6733	5.5468	10.3982	2.76582	9.87564	5.10191	5.63065	6.80671	8.35899	6.91078	7.66655	6.77841	7.21262	9.75499	2.59177	9.76178	7.47902	1.89627	8.86379	8.29045	6.42438	0.813415	5.86921	4.93143	1.21177	2.53984	2.12945	8.18188	3.6969	8.12383	3.046	2.00587	3.53447	6.9025	4.29193
Tanzanian	7.28988	5.1436	0.82873	1.87553	7.25184	8.24889	5.92714	9.12787	5.71012	2.67945	3.87006	5.40611	6.793	10.5858	4.78028	5.3338	9.40997	3.59815	9.59922	5.60481	5.04457	5.55492	8.22412	6.68855	6.24737	6.36383	6.27578	9.66983	2.0766	8.4489	8.24331	2.24579	9.04299	8.54918	6.52796	0.740275	5.50498	3.9542	1.00102	2.45328	2.32958	7.82158	3.99505	8.4298	2.45903	1.60487	3.45516	7.06738	3.70954
Tanzanian	7.30708	6.30084	1.48236	2.7997	7.18451	8.70562	6.79783	9.52431	6.45829	2.15583	4.45458	5.15923	7.14531	11.4066	5.86437	6.27492	9.9651	3.86226	10.0834	4.96424	6.17287	6.86531	8.37807	7.24652	8.79342	6.13764	6.55363	9.33516	2.37833	7.87439	4.37859	2.18254	9.01887	8.53043	5.80779	3.23108	6.59206	6.44212	1.58834	3.09137	1.87312	8.54752	3.9064	8.36375	3.53107	2.62923	3.38995	7.41723	4.01197
Tanzanian	8.20888	5.97516	1.40409	2.7558	7.49953	10.4828	7.0006	9.93835	6.75638	2.33838	4.21856	5.60055	7.72646	11.4418	5.50151	6.30717	10.7358	3.87935	10.0369	4.86761	5.51291	7.16704	8.56201	6.72418	7.56098	7.00237	7.23241	9.83934	2.09056	8.02229	6.88278	2.53944	8.98852	8.61573	6.45659	1.07489	6.30849	5.38096	1.3021	2.13847	2.3449	9.06192	5.17366	7.79995	2.79022	1.92406	4.56843	7.27724	4.35825
Tanzanian	7.36353	5.18304	0.95418	1.79661	7.62836	8.00624	5.82959	9.36087	6.65855	2.38719	4.93898	5.6635	7.73229	11.142	5.29618	5.32594	10.279	4.34853	9.94103	6.16644	5.95001	5.2523	8.89268	7.10637	6.37002	5.96117	7.14145	9.2747	1.57954	9.81427	7.34549	1.89979	8.9606	7.75914	4.85804	1.69935	6.15271	4.73733	1.33106	1.7459	2.04012	7.5419	4.77337	8.49372	3.30247	1.59241	3.66799	6.66796	4.23919
Tanzanian	8.02632	6.92434	1.15877	2.59679	7.373	8.29345	7.65794	9.26839	6.52067	2.08707	3.63216	5.40578	6.90381	10.8101	4.92983	5.81715	10.2383	4.13171	9.50954	5.65845	4.9163	5.68203	7.88337	6.57677	7.64243	5.47088	7.35787	9.68475	2.23339	9.29917	11.0309	2.1942	8.42989	8.17743	6.15766	0.625875	5.81872	5.27407	0.62684	2.55973	1.33211	7.72137	3.15611	9.00846	2.37439	2.2892	3.84725	6.5544	4.11921
Tanzanian	7.838	5.48803	1.05654	2.57648	7.80428	8.77487	6.72812	9.72588	6.40562	2.66101	4.57522	6.05553	7.16679	11.3614	5.56922	5.61514	11.9001	4.78611	9.98045	6.82517	6.0787	7.39754	9.87477	8.19266	7.1844	6.56126	8.65048	9.70441	2.06499	10.032	6.93006	2.20316	9.34261	8.62145	6.88376	0.861875	6.18435	5.30452	1.21462	3.38154	1.56248	8.06282	10.1583	8.75488	3.37561	2.0419	3.85327	7.40913	4.20565
Tanzanian	8.43266	6.08788	2.30309	2.67995	7.31698	8.8016	6.07041	9.13429	6.5991	2.19633	4.48365	6.34586	7.14572	10.9262	5.63922	5.84619	8.99396	3.12378	9.89062	6.39712	6.0509	7.41376	8.49639	6.1239	7.41486	6.92666	6.75021	9.44055	1.57584	9.09238	7.02683	2.55233	8.62641	8.05555	6.57057	1.03689	5.93351	5.53629	1.36312	1.63643	1.91359	8.25858	3.70704	8.2805	2.25585	1.74633	3.02757	6.74507	4.15802
Tanzanian	9.15973	5.57958	2.23313	2.57412	7.98434	7.90196	7.0553	10.3235	6.93069	2.84678	4.22678	5.41411	7.04849	11.3753	5.36232	5.52864	9.70275	3.8854	10.0145	5.56035	6.01678	7.51004	9.53878	7.82712	8.51853	7.17417	8.01646	9.54465	2.16194	10.1495	6.84233	3.75311	9.11992	8.43359	5.698	1.26327	6.1688	5.26281	1.34243	4.15685	3.08751	8.30946	4.21404	8.47744	2.7352	1.81568	4.15867	7.16312	4.47655
Tanzanian	6.8834	5.23233	1.25463	1.95068	7.23507	8.10066	7.44101	9.93362	6.11616	3.55606	4.20054	6.12991	6.76297	10.9969	5.49639	5.42586	10.97	3.65483	10.0304	5.79329	6.3028	5.92851	7.8027	5.95451	6.0552	5.85058	6.55436	9.69351	2.14073	8.02392	5.42133	1.97635	9.71035	8.11917	5.82326	0.622725	5.79486	4.16822	0.78614	1.76672	4.27919	7.69501	3.12881	7.75059	2.87995	2.05178	3.57327	6.84602	4.46661
Tanzanian	7.66807	5.77255	1.82555	2.5687	6.6231	8.70181	6.35231	10.2283	6.12951	2.65515	4.46099	5.51694	6.98029	10.9072	5.11531	5.56231	11.1461	3.13319	9.96076	5.16776	5.2401	7.10222	7.99622	6.20884	8.1011	6.62922	6.63098	9.37111	2.88374	9.03283	5.98809	2.17909	8.93237	8.46407	5.36549	1.56141	5.92734	5.12925	1.01254	2.03687	2.371	7.6611	4.31241	8.26229	3.21992	6.59872	3.76031	6.83423	3.86846
Tanzanian	8.4252	6.00023	1.97911	2.25447	8.27478	8.8917	7.27843	9.57784	6.9722	4.00236	4.64168	5.60567	7.35697	11.0319	5.6786	5.67455	10.0788	3.33609	10.002	5.97896	5.76908	7.04946	9.05271	7.49882	7.26478	6.83523	7.41962	9.60299	2.60895	7.94146	8.33863	8.65226	9.40864	8.52941	6.6845	0.738605	5.82691	5.8221	1.09476	3.38103	2.14707	8.23676	3.80125	8.19425	3.94597	2.07566	3.87837	6.99894	4.23243
Tanzanian	7.55065	6.08334	2.16389	2.51725	6.77012	8.48697	5.5571	9.78701	6.09223	2.53196	4.1186	5.18262	7.25935	11.3743	5.84349	5.68992	11.2359	3.82987	10.1645	5.53941	5.5704	7.17793	9.17139	7.07491	8.43096	6.84096	6.56877	9.60003	3.12629	9.10944	6.73188	3.17918	9.69558	8.62772	6.73461	1.20165	6.23292	5.2241	1.10916	2.04718	2.14182	8.17343	3.59911	7.76136	3.88616	2.38271	3.59022	7.22098	4.27621
Tanzanian	7.18649	6.4321	2.45777	2.76114	7.48301	9.10007	6.52731	10.1058	6.45224	2.52673	4.36311	5.86836	7.08757	11.4623	5.73201	5.80016	10.5544	4.45603	10.0641	6.05276	6.09975	7.72182	9.03733	7.36742	9.0765	7.37925	7.26588	9.35556	2.1396	8.13997	7.94659	2.53376	9.3382	8.66524	6.96903	0.582025	6.55724	6.10788	1.19018	2.12647	1.84085	8.86981	3.10647	8.88096	4.65757	2.1864	3.72009	7.29612	4.25299
Tanzanian	7.84012	6.13629	2.77379	2.90178	7.47952	9.19257	6.89507	9.69698	6.9204	3.37271	4.14673	5.27168	6.67327	11.3694	5.20009	5.43016	9.69243	3.58649	9.97293	6.06047	6.14583	8.61136	8.47144	6.42192	10.0389	7.13424	7.59046	9.86646	3.30383	8.50075	9.69299	2.45854	9.37599	8.38403	6.07951	2.09829	5.84755	4.12322	1.22467	2.30056	2.3	7.52779	3.69562	8.01037	3.0173	2.7695	11.7866	6.99491	3.95046
Tanzanian	7.45254	5.9265	2.3455	2.73126	6.98343	8.35502	7.46218	10.3077	6.22239	1.56619	4.26335	5.27649	6.72419	11.2509	5.5374	5.52111	11.2073	2.73513	9.93263	6.63143	5.93092	7.04207	8.71931	7.22176	7.33165	7.10131	8.53787	9.49524	2.07797	9.95415	6.07017	1.98333	8.69502	8.24211	6.22607	1.51883	5.98609	4.48438	1.11644	1.5349	2.05651	7.83446	3.6264	8.17381	2.6313	2.11321	3.46801	6.915	3.7826
Tanzanian	8.35525	5.95355	2.5059	3.04198	6.25857	8.26688	5.32551	9.88329	7.20007	2.36495	4.36623	4.94205	7.59143	11.2427	5.33676	4.92337	10.4428	3.35311	9.99333	6.6116	6.01429	7.80337	8.70199	7.01705	9.30274	7.45458	6.64492	9.08477	2.32441	10.761	9.78391	3.00237	9.92088	8.28666	6.47096	0.734765	6.24505	5.43403	1.01038	2.95085	2.81163	8.45518	4.05635	8.23011	2.75894	1.99572	3.13591	7.30257	4.2178
Tanzanian	8.23251	5.45873	2.67571	2.90584	7.34661	7.95106	7.31973	9.40622	5.99969	2.11074	4.17908	5.92124	6.90911	11.367	5.27241	5.41918	9.35215	3.10271	9.88585	5.99734	5.91651	7.98247	8.25657	6.83437	8.21575	7.21924	7.27621	9.38495	2.39547	9.26896	8.21539	3.02962	8.97817	8.29011	5.98786	1.25906	6.27951	4.90226	1.14893	2.06114	2.72219	8.02109	5.01225	8.28599	3.05031	2.3325	3.77071	7.41308	3.9076
Tanzanian	8.98269	6.30445	3.00669	3.06222	7.41051	8.86661	6.72374	9.75892	7.09448	2.09968	4.68471	6.17971	7.03075	11.5384	5.38167	5.27663	10.4892	4.2428	9.99062	5.68124	6.03164	8.02889	8.76046	6.50374	10.969	7.06438	7.18909	9.69948	3.40673	9.1022	6.70728	2.24153	8.42827	8.76647	5.18175	0.780885	6.07092	4.21859	1.28872	3.3979	2.28655	8.27908	4.85377	8.39447	2.6311	2.54714	4.33472	6.958	4.31442
Tanzanian	7.67072	6.12308	1.85083	2.71574	7.73598	8.40931	7.22136	9.70159	5.53514	2.32435	3.74365	5.33033	7.28938	11.0871	5.46862	5.77656	10.3565	3.91515	9.78764	6.28394	6.04806	6.28179	8.53909	6.9979	6.29345	7.27553	6.62124	9.52012	2.14295	8.44154	7.83425	2.19939	9.2775	7.96354	7.01604	0.816805	5.87024	5.5705	0.68171	2.88681	2.5174	7.9125	2.95443	7.42798	2.42854	1.86183	3.62032	6.79005	3.99714
Tanzanian	7.51792	5.58964	2.23954	2.78563	7.29401	8.80407	6.00373	10.1721	6.37535	1.84076	4.11827	6.06649	7.5317	11.2822	5.19359	5.32629	10.0266	3.60583	10.0329	5.99504	5.9087	7.71284	8.95323	6.13437	9.50291	7.64123	7.33521	9.55866	2.30583	9.60141	4.92419	2.19537	9.33169	8.43124	6.08325	1.88338	6.1379	4.94944	1.55165	2.43351	1.04217	7.99907	3.28834	8.39968	4.01044	3.00866	4.1615	6.44139	4.43511
Tanzanian	7.37073	4.86006	2.80645	2.50566	7.14687	9.33107	6.67813	9.99029	6.05621	1.98819	3.81327	5.06224	6.57435	10.6793	5.2691	4.94205	11.2479	3.33014	9.64182	5.52445	5.59025	8.08488	7.55578	5.81106	7.80072	7.52278	5.86128	9.18445	1.79868	8.75299	7.58476	1.94049	8.32211	8.60322	4.90283	0.573425	5.79807	4.50462	0.74232	1.97682	1.54144	7.67347	3.10295	7.06717	2.61822	2.69686	3.48215	6.84589	3.92959
Tanzanian	7.23667	5.18818	2.26136	2.51859	7.01615	8.14184	6.18938	10.5891	6.3868	2.11207	3.96303	5.40358	7.547	11.2215	5.25619	5.31098	10.311	3.00115	9.77713	6.10863	6.12639	6.81872	8.52876	7.58856	8.75536	6.93555	6.65358	9.86653	1.59394	9.20365	4.93134	2.11747	9.2871	7.91585	5.61247	2.52372	6.30368	5.21106	0.90208	1.79167	1.86376	7.60188	4.72051	7.89747	2.82858	2.81426	2.91553	6.97764	4.52262
Tanzanian	8.71475	6.7282	3.1034	3.60126	6.48195	8.66451	5.88394	9.97827	6.44248	1.98856	4.388	5.66596	7.26026	11.415	5.11689	5.53486	9.76843	3.16419	10.0437	5.61248	5.7991	9.1278	10.008	8.56936	10.9026	8.19221	7.44742	9.86952	2.11953	8.65523	6.1245	2.18789	9.08352	8.34731	7.96337	0.696285	6.00854	4.68783	1.18135	2.02375	2.60703	7.76673	4.21828	8.59117	3.64139	3.03476	3.46389	7.32043	3.78637
Tanzanian	8.51507	6.18783	2.98382	3.16546	7.30516	8.71032	6.78854	9.21763	6.41788	2.18435	5.04434	7.12362	7.1336	11.3935	5.44929	5.10255	9.75949	4.311	9.64873	6.83115	5.45267	8.41165	8.55257	7.34498	10.296	8.779	7.20413	9.34444	2.00291	10.2704	5.80938	2.1806	8.44415	8.38931	6.50405	2.03499	5.91392	5.89482	1.55223	2.01084	2.08277	8.48925	4.37298	8.15265	2.57441	2.53967	4.44447	7.82632	4.03316
Tanzanian	9.41258	5.87401	3.66799	3.64793	6.70838	9.89489	6.68248	9.65296	6.11353	1.94196	4.05574	5.50293	7.33751	11.2572	5.69799	6.19958	10.2842	3.46717	9.7577	5.42904	5.51402	9.89282	8.25446	7.0917	9.98392	9.21161	6.62277	9.97257	2.38011	9.2873	5.95595	2.80306	9.08166	8.25853	5.21742	0.962385	5.86149	5.59415	1.10883	2.26312	2.25267	7.4863	6.43527	8.08404	2.52461	3.47878	4.09898	7.13061	3.88146
Tanzanian	8.85545	5.42638	3.16799	3.46497	7.04401	8.12232	6.38753	10.083	6.98468	1.90648	4.76067	5.84298	7.22114	11.4996	5.62174	5.65944	10.4504	4.34689	9.79796	5.2197	6.02048	9.54209	8.49827	7.62944	11.2263	8.97114	6.48306	9.44184	2.24731	8.82375	4.2529	2.34904	9.22124	8.21224	5.51201	1.43667	5.78557	4.63563	1.16859	1.8134	1.63095	7.96835	3.39253	7.76961	2.53846	2.43471	4.00187	7.39295	4.18519
Tanzanian	7.8372	5.94247	2.78134	2.57919	6.87231	10.006	5.98209	9.12369	5.53822	1.81437	4.16601	5.58901	6.8031	10.7121	5.06406	5.00071	9.12646	3.76456	9.65894	5.91455	5.21506	7.93072	9.03519	6.67311	10.2871	6.97319	7.02679	9.41067	1.88882	9.18868	7.30422	2.51299	8.91962	8.35512	5.82862	0.737435	5.89809	5.02536	1.20124	2.00418	2.81264	8.04682	3.45458	8.48021	3.28627	2.07305	3.94971	6.8541	3.65342
Tanzanian	7.3792	5.23198	2.9891	2.62213	6.46639	8.09235	6.24655	8.77305	5.83619	1.75621	3.66769	5.62969	6.76966	10.5912	5.2026	5.63776	9.82067	3.37209	9.47822	5.17744	5.44871	8.29295	8.01655	6.35757	8.19546	7.09279	6.86121	9.40733	1.75798	7.78738	4.45371	1.43712	9.04388	8.02246	4.91264	1.35482	5.77846	4.90918	0.8484	2.21034	1.90769	7.98736	3.16201	7.64523	3.05034	1.93443	3.66112	6.62254	3.90764
Tanzanian	8.46913	6.55847	3.21737	3.9459	7.63438	9.04238	6.46278	10.2204	7.03866	2.33875	5.32881	6.66064	7.20125	11.411	5.20157	6.01959	8.48189	4.03927	10.0665	5.66107	5.61796	8.87109	9.17243	7.68322	10.9531	6.58777	7.21214	9.37937	3.51086	8.73458	8.12995	2.57952	9.81531	8.86877	6.64788	0.621145	6.03238	4.58701	1.36252	1.79626	1.72698	9.03439	4.27318	10.0209	6.44895	2.38389	4.44729	7.60536	4.33675
Tanzanian	7.81464	6.13945	3.68131	3.22891	7.42812	8.63528	5.81566	9.63587	6.79284	2.5888	4.24927	5.95791	7.43902	11.2457	5.10424	5.7596	10.6745	4.33371	10.0538	5.88328	6.48515	8.58475	9.15021	7.01593	9.63977	7.60579	6.89313	9.5983	1.86343	10.0606	6.7889	1.69883	9.65734	8.80356	7.07706	1.23338	6.25462	5.814	1.04696	1.93741	1.77886	8.50477	3.31821	9.16895	3.2622	2.16755	3.33163	7.60396	4.52111
Tanzanian	7.91932	5.12584	2.56922	2.99591	6.9026	8.84347	6.95581	10.2983	6.21274	2.07578	4.12157	5.39379	7.104	11.2426	5.57177	5.87303	9.43426	4.48449	9.77832	5.53741	5.52426	7.27621	8.43794	7.89212	8.93233	7.18198	6.74991	9.24776	3.46315	8.6412	6.34014	1.85518	7.95418	8.12979	5.68205	0.674125	6.10607	5.12777	1.34304	2.20595	1.34947	8.03848	3.31377	8.59768	2.64379	1.79909	3.86705	6.81869	4.05505
Tanzanian	8.2922	5.53209	3.01129	3.09607	7.34139	8.16379	6.84396	10.197	6.53158	2.17024	8.47588	6.26581	7.56142	11.6187	5.50779	6.05886	10.1586	4.29875	9.94293	6.62743	6.22503	7.70822	8.82967	9.01569	8.88895	7.36482	8.31363	9.5714	2.45513	8.27698	6.11273	2.12851	8.68366	8.22143	6.91254	0.817505	6.26347	5.41418	1.83947	2.23905	2.29444	8.37786	3.72626	8.73467	2.48443	2.50646	3.72549	7.09087	3.95309
Tanzanian	7.55675	6.2005	1.85365	2.31091	7.22931	8.27074	7.29265	9.78932	7.31241	2.15594	6.69351	5.99629	7.61841	11.813	5.47862	5.69965	10.1198	4.82679	9.75733	6.351	5.78203	6.88284	9.128	6.83881	6.89557	7.10555	7.15613	9.75025	1.67714	8.30298	6.47843	2.27146	9.44974	8.33671	7.62265	0.859595	6.54216	5.59785	1.09224	2.15674	1.64688	8.62496	4.0045	8.76468	2.82607	2.00331	3.76786	7.23695	4.39172
Tanzanian	8.64317	6.13288	2.32089	2.81566	7.13737	8.82569	6.82173	11.0293	5.87678	2.3823	5.16728	6.65383	7.10785	11.299	5.7604	5.85642	10.2554	3.60758	9.86701	6.23943	6.02809	7.50603	8.87789	7.14808	8.52096	6.77322	7.34511	9.58924	2.06303	8.23575	8.0402	1.5924	8.94861	8.30019	6.16477	0.483325	6.15683	5.31196	1.32141	2.21097	2.34586	8.30467	5.47586	8.48444	2.25217	2.26778	3.97655	7.46666	4.11932
Tanzanian	6.7755	5.5991	1.64733	2.23695	6.96325	8.68009	5.49123	9.65146	6.12563	2.33234	4.21002	5.5138	7.13617	11.0502	5.4595	5.98069	10.037	4.59065	9.82668	5.42912	5.97357	6.53571	8.61546	6.11528	7.53064	6.70812	7.4638	9.42109	1.77737	9.26264	5.09331	1.98974	9.26758	7.82483	7.4088	0.790045	5.93041	5.58664	1.37392	2.24064	1.36135	8.14252	3.99681	8.75568	2.57464	1.50117	3.55741	6.80422	4.11736
Tanzanian	7.4974	6.15529	1.99703	2.62369	7.84749	8.36718	6.45472	10.4147	6.35168	2.15786	6.81459	5.39095	7.12372	11.2982	5.26858	5.56072	11.0383	4.03587	9.72833	6.34582	5.95554	7.67802	8.77658	7.7188	10.0573	7.16641	7.36276	9.64682	2.01839	8.66801	8.33971	1.93124	9.48211	8.03735	5.94737	0.663905	6.28902	5.2725	0.70789	1.60204	1.83838	7.71474	3.38619	9.53061	3.13254	2.11571	3.76274	7.17457	4.30476
Tanzanian	9.77857	6.58368	4.24333	4.82526	6.72195	8.67445	8.56946	10.34	7.45524	3.05435	5.06386	6.62953	7.94537	11.7221	5.64795	6.38	10.5869	4.53076	10.0208	6.74713	5.97782	10.0588	9.49037	8.56737	10.4801	8.70478	9.868	9.61979	3.30539	8.85802	9.21747	2.77086	8.80021	8.61363	5.87909	0.720015	6.4353	5.15604	1.55706	2.47656	2.12263	8.92396	4.26577	9.88292	3.39812	3.14373	4.9697	7.91875	4.37491
Tanzanian	8.79139	5.75082	3.30868	2.98052	6.41322	8.36186	4.80101	10.5732	6.67176	1.81668	3.89208	5.0354	7.5382	11.2049	5.42508	4.96305	11.3039	2.86413	9.88085	4.97475	5.52171	8.89496	8.46159	8.27381	9.45515	7.68121	6.409	9.27579	2.63876	8.95834	4.74331	2.30139	8.84413	8.08689	4.89368	0.951245	6.17197	5.06776	1.13841	1.72784	1.5453	9.34736	3.35557	8.46186	2.54916	1.95879	3.34482	7.09276	3.96373
Tanzanian	9.62109	6.87866	5.07486	4.60807	6.51509	8.91855	6.94995	8.85319	6.57674	1.96695	6.07158	8.19473	7.22011	11.8621	5.54204	5.684	10.9647	4.03521	10.3826	5.35867	6.31635	10.1365	9.79442	8.37994	11.7448	9.86004	7.53336	9.40672	2.76857	10.2383	10.207	1.82587	9.37556	8.64867	8.79977	0.850285	6.85815	5.75002	2.08293	2.46035	1.21531	8.33557	4.31419	9.7795	3.50506	4.28914	4.80051	8.08024	4.29308
Tanzanian	8.22946	5.45378	3.67709	3.36234	7.73402	8.70064	8.17669	10.1736	6.21458	2.56056	4.54049	6.14905	7.37769	11.4887	5.01496	6.02761	11.2898	3.49965	10.1346	6.56978	6.54801	8.92454	8.78748	7.73201	11.5129	7.88865	6.86852	9.84412	1.85227	8.53661	6.77769	1.87878	10.0758	8.46936	6.20178	0.610945	6.04619	5.2248	1.56768	3.92188	1.54156	7.84158	4.29059	8.94943	2.92198	2.13861	4.77405	7.31754	4.57791
Tanzanian	8.38599	6.24646	3.30265	3.50769	6.44661	8.38233	6.42129	9.18826	6.51748	1.95872	3.5844	5.34969	6.93767	11.0445	4.83855	5.13577	9.7482	2.82131	9.62515	5.0087	5.27301	8.67173	8.53397	6.65215	10.8696	7.84781	6.45078	9.51803	2.60573	8.23565	6.80301	2.39904	8.42844	8.16611	4.83553	0.772105	6.13286	4.12465	0.76065	2.05996	1.54401	8.51278	3.0218	7.03519	3.30712	2.10524	3.57565	6.84868	4.01489
Tanzanian	10.3377	6.57259	5.90271	5.29466	7.23848	8.14091	6.60887	9.00702	6.25816	2.35979	6.48097	6.70709	7.38659	11.497	5.74981	5.69953	10.3576	3.90796	9.73769	5.84131	5.45215	11.3546	8.33844	8.39088	13.4512	10.8125	6.85895	10.0888	2.29779	8.67301	11.2862	2.50425	9.24245	8.60965	6.49325	0.960065	5.93394	4.998	1.08235	1.8476	2.03746	7.9679	3.57613	9.43332	2.98658	5.07226	5.89364	8.31874	4.09447
Tanzanian	9.78063	6.42141	5.01207	4.73809	7.00655	8.50301	8.1102	10.1368	6.08742	2.87579	4.30124	6.37244	7.72292	12.2935	5.82668	5.95977	10.1431	5.6627	9.90579	6.43948	5.85145	10.9574	9.24491	8.0135	12.5542	9.95123	7.36003	9.73202	2.92863	9.46406	7.02458	2.36301	9.01902	8.83046	6.19134	1.10072	6.23538	6.28336	1.56152	3.65579	2.50109	7.90848	3.81677	9.41853	3.33478	4.82129	4.51921	7.85529	4.27111
Tanzanian	7.90226	5.71669	1.77924	2.3078	7.34829	7.9344	6.03577	9.80254	6.74345	2.26901	4.18529	5.57047	6.8964	10.926	5.39141	5.92506	9.74304	3.82807	9.73614	5.56955	5.74451	7.10771	8.33193	7.02388	6.80152	6.77595	6.80225	9.37208	1.60471	7.52464	3.63017	1.87139	8.9718	8.05915	6.04349	1.21141	5.79096	4.25739	1.05042	2.45228	1.4701	7.83204	3.28586	7.94944	2.07564	1.82712	4.4101	6.62624	3.89531
Tanzanian	8.48575	5.84054	1.75392	2.54766	7.63518	8.50714	6.55067	9.95731	6.77588	2.53855	4.34764	6.36698	7.59464	11.5109	5.54054	5.68994	10.2397	4.26403	9.82147	5.54936	6.42937	6.872	9.20212	6.67874	8.4456	7.24019	7.11986	9.26566	2.08944	9.10548	7.04263	2.18415	9.2781	7.99551	7.38297	0.961685	6.15567	5.58561	1.22045	2.91966	1.89454	8.2676	4.60797	9.60596	2.7272	2.46849	3.56139	7.06684	4.06754
Tanzanian	7.92647	4.79237	3.40151	3.39436	6.64215	8.60906	5.90623	9.50639	6.5016	2.33833	4.48799	6.07207	7.04999	11.0896	5.16966	5.32198	10.0196	2.72393	10.1349	4.87309	5.06229	8.69107	9.13203	8.59049	11.4322	7.6212	7.13181	9.20648	3.17571	8.94215	5.48982	3.11959	9.01003	8.65897	6.6809	1.05834	5.63028	6.0186	0.73354	2.05328	1.62777	8.76359	3.40406	7.88521	4.0095	3.02338	3.82277	7.34734	4.16508
Tanzanian	8.2629	6.15484	2.90949	2.83737	6.54903	8.55446	6.32512	9.42975	6.92938	2.18559	4.19965	4.96002	7.14699	10.4232	5.50977	5.79666	10.1483	3.16026	9.83947	4.61789	5.72782	8.51192	8.62488	6.5322	9.69116	7.3624	6.57287	9.27528	2.0995	8.47991	8.73495	2.18816	9.04267	8.19966	5.82982	0.951865	5.92584	5.17997	1.14262	2.2554	2.64588	7.57821	3.49492	7.8658	3.2226	2.34806	3.70253	7.1129	4.29847
Tanzanian	8.33039	5.70864	3.22416	3.17937	7.36945	8.45242	6.51901	9.82976	6.07561	2.43867	3.80192	4.89755	7.07378	10.9009	5.32092	5.692	9.83197	2.61772	9.44811	5.74421	5.29729	8.36797	8.30395	8.21531	10.9211	7.83929	7.30274	9.42779	2.22336	7.1433	4.7684	1.88928	8.30615	7.7796	5.9548	1.53703	5.68879	5.59293	1.0785	2.48016	2.35952	7.34382	3.6556	7.77684	2.12281	2.27597	3.83132	7.00479	3.77814
Tanzanian	8.5303	5.66212	3.20439	3.00214	7.25319	8.15143	8.28017	9.44745	5.80147	1.5059	4.36451	5.85374	6.85498	11.0741	5.32543	5.57369	10.3088	2.94652	10.006	5.53904	5.66313	8.96709	9.45609	6.9816	9.34759	7.87516	6.88657	9.56619	2.18811	9.57808	6.80575	1.8886	8.64367	8.73032	6.03903	0.769085	5.59971	4.52297	1.10579	2.42798	3.3316	7.68356	3.45708	7.02419	3.1727	2.28167	5.14086	6.78796	4.35484
[truncated: 25 more columns]
