# Supplementary material for: Differences in the inflammatory proteome of East African and Western European adults and associations with environmental and dietary factors
Source: eLife. 2023 Aug 9;12:e82297. doi: 10.7554/eLife.82297 (PMC10473835; doi:10.7554/eLife.82297)
Supplement: Supplementary file 2. — This table relates to the data displayed in Figure 1. [file elife-82297-supp2.xlsx]

## Sheet: Sheet1
Differetial expression analysis Tanzanian vs Dutch cohort
Proteins	av_expr	Log2FC (Tanzanian/Dutch)	pvalue	fdr
4E-BP1	6.59634	1.87517	1.06587e-61	1.31458e-60
ADA	5.15323	0.527974	2.7438e-52	2.90059e-51
AXIN1	3.03623	-0.727571	2.19745e-18	6.50445e-18
CASP-8	3.03598	-0.43154	1.09865e-19	3.53478e-19
CCL11	5.89964	0.679178	2.95603e-64	7.29154e-63
CCL19	8.57995	-0.0387111	0.479821	0.51459
CCL20	6.29559	0.477136	8.82426e-13	1.92058e-12
CCL23	10.0411	-0.328346	3.98093e-18	1.09107e-17
CCL25	5.66217	0.308974	1.83527e-13	4.11546e-13
CCL28	1.71757	0.395672	2.19671e-39	1.62556e-38
CCL3	3.37986	0.556532	2.92987e-10	5.55924e-10
CCL4	4.98638	0.358336	1.34199e-15	3.4244e-15
CD244	7.03625	0.0210827	0.450126	0.489843
CD40	10.9978	-0.212225	2.66298e-12	5.63031e-12
CD5	5.08395	0.282377	1.45729e-31	8.29532e-31
CD6	5.02587	0.350982	1.22626e-21	4.53716e-21
CD8A	10.2987	0.567566	2.10053e-15	5.18131e-15
CDCP1	1.26848	0.731682	9.84134e-63	1.82065e-61
CSF-1	9.62337	0.0238477	0.177665	0.212052
CST5	5.22821	0.484058	6.25405e-34	3.85666e-33
CX3CL1	5.80139	-0.0149899	0.622772	0.640071
CXCL1	8.30011	-0.411731	2.29827e-05	3.61855e-05
CXCL10	8.33711	-0.235638	4.33405e-05	6.68165e-05
CXCL11	7.01561	-0.0419219	0.557402	0.580954
CXCL5	9.09987	-0.548058	1.0954e-05	1.76217e-05
CXCL6	8.01912	-0.554372	2.24875e-14	5.20022e-14
CXCL9	6.57798	0.1109	0.0765182	0.0976267
DNER	9.26764	0.398314	1.34737e-82	9.97056e-81
EN-RAGE	1.75717	0.379777	1.86908e-14	4.46166e-14
FGF-19	8.16824	0.195022	0.00586796	0.00835056
FGF-21	4.47	1.32536	2.38017e-31	1.25809e-30
FGF-23	2.03534	0.0515588	0.36668	0.408916
Flt3L	8.59446	-0.119732	7.99968e-05	0.000120811
HGF	7.44426	0.245889	2.92717e-18	8.33117e-18
IFN-gamma	5.93127	-0.0533927	0.531424	0.561791
IL-10RA	1.20211	0.0635861	0.286528	0.326201
IL-10RB	5.71695	0.0329078	0.137157	0.166387
IL-12B	4.98122	-0.0742824	0.0923385	0.113884
IL-12B	4.98122	-0.0742824	0.0923385	0.113884
IL-15RA	1.10637	-0.107241	3.12389e-08	5.63824e-08
IL-17A	1.7489	0.708773	1.43118e-34	9.62792e-34
IL-17C	1.17748	0.713204	3.0894e-76	1.14308e-74
IL-18R1	7.61216	-0.0109841	0.722012	0.731903
IL10	3.49344	0.397015	4.32004e-12	8.88009e-12
IL18	7.41616	0.395574	1.84574e-18	5.69104e-18
IL6	1.38956	0.192975	0.00129495	0.00191652
IL7	2.77898	-0.367799	7.9284e-11	1.54395e-10
IL8	4.20334	-0.288652	1.48778e-06	2.50218e-06
LAP.TGF-beta-1	7.12619	-0.199368	1.82213e-07	3.21042e-07
LIF-R	3.75917	0.357477	3.62208e-62	5.36068e-61
MCP-1	10.3748	-0.444899	1.36861e-30	6.75183e-30
MCP-2	7.25574	0.499317	2.15356e-23	8.38757e-23
MCP-3	0.572657	0.609398	8.98684e-43	7.38918e-42
MCP-4	11.4024	-0.0998906	0.0647885	0.0841114
MMP-1	8.99592	-0.372155	1.89878e-06	3.12243e-06
MMP-10	8.56731	0.23466	1.26357e-06	2.17451e-06
NT-3	3.06103	-0.0978338	0.00993027	0.0138649
OSM	2.84472	0.613411	3.46374e-21	1.22056e-20
PD-L1	6.59468	-0.0776487	0.00329316	0.00477831
SCF	9.15512	0.185472	5.6904e-10	1.05272e-09
SIRT2	4.45944	-0.198479	0.0311753	0.0419449
SLAMF1	1.38905	0.277922	2.015e-27	9.31936e-27
ST1A1	4.0937	-0.772396	8.21151e-17	2.17019e-16
STAMBP	5.35935	-0.143371	0.0232651	0.0318818
TGF-alpha	2.92498	0.383344	5.93976e-52	5.49428e-51
TNF	2.64618	0.478809	8.21195e-20	2.7622e-19
TNFB	4.81876	0.0439593	0.201405	0.236571
TNFRSF9	6.99346	0.0360719	0.22388	0.258862
TNFSF14	3.13189	0.0630871	0.0878577	0.110194
TRAIL	7.42936	0.265524	9.26858e-26	4.03456e-25
TRANCE	4.78299	-0.0457545	0.370234	0.408916
TWEAK	9.31108	0.293876	2.99206e-25	1.23007e-24
uPA	9.89298	0.218337	5.83238e-11	1.16648e-10
VEGFA	9.55403	-0.00700962	0.759842	0.759842
