# Supplementary material for: Differences in the inflammatory proteome of East African and Western European adults and associations with environmental and dietary factors
Source: eLife. 2023 Aug 9;12:e82297. doi: 10.7554/eLife.82297 (PMC10473835; doi:10.7554/eLife.82297)
Supplement: Supplementary file 3. — This table is related to the data displayed in Figure 3. [file elife-82297-supp3.xlsx]

## Sheet: Sheet1
Parameters		Lower expression inflammatory cluster (N = 167)	Higher expression inflammatory cluster (N = 124)	Pvalue	Statistics
|**age**	Median	|29.6262833675565	|32.7501711156742	0.010605	Mann-Whitney
	IQR	|16.5215605749487	|17.1382614647502
	Quantile1	|18.1273100616016	|17.7577002053388
	Quantile2	|22.2477754962355	|25.2443531827515
	Quantile3	|29.6262833675565	|32.7501711156742
	Quantile4	|38.7693360711841	|42.3826146475017
	Quantile5	|66.4312114989733	|59.5263518138261
|**BMI**	Median	|23.4509182190514	|24.39702678457	0.1362899	Mann-Whitney
	IQR	|5.50219705805573	|6.89105490184693
	Quantile1	|16.40625	|17.0433026133064
	Quantile2	|21.3319315685088	|21.7940897788516
	Quantile3	|23.4509182190514	|24.39702678457
	Quantile4	|26.8341286265645	|28.6851446806985
	Quantile5	|41.914342325865	|39.84375
|**Gender**	Female	|89/167 (53.3%)	|57/124 (46.0%)	0.2638188	Chi-square
	Male	|78/167 (46.7%)	|67/124 (54.0%)
|**Residency_Area**	Rural	|33/167 (19.8%)	|30/124 (24.2%)	0.4448202	Chi-square
	Urban	|134/167 (80.2%)	|94/124 (75.8%)
|**Seasonality**	Dry	|127/167 (76.0%)	|85/124 (68.5%)	0.1973038	Chi-square
	Rainy	|40/167 (24.0%)	|39/124 (31.5%)
|**Food Cluster**	Healthier food cluster	|89/167 (53.3%)	|46/124 (37.1%)	0.008769825	Chi-square
	Less healthy food cluster	|78/167 (46.7%)	|78/124 (62.9%)	0.0005506364	Log regression model corrected for age
