# Supplementary material for: Differences in the inflammatory proteome of East African and Western European adults and associations with environmental and dietary factors
Source: eLife. 2023 Aug 9;12:e82297. doi: 10.7554/eLife.82297 (PMC10473835; doi:10.7554/eLife.82297)
Supplement: Supplementary file 4. — This table is related to the data presented in Figure 4. [file elife-82297-supp4.xlsx]

## Sheet: Sheet1
Multivariate linear regression analysis between metabolites and protein expression concentrations in Tanzanian cohort
Proteins	Covariate	Estimate	Std. Error	t value	pvalue	fdr	class	sub class
SIRT2	Resveratrol 4''-(6-galloylglucoside)	3.83494	0.228358	16.7935	6.36282e-45	1.35604e-40	Prenol lipids	Sesterterpenoids
AXIN1	Resveratrol 4''-(6-galloylglucoside)	3.41382	0.204322	16.7081	1.33007e-44	1.41732e-40	Prenol lipids	Sesterterpenoids
STAMBP	Resveratrol 4''-(6-galloylglucoside)	2.62032	0.160185	16.3581	2.72255e-43	1.9341e-39	Prenol lipids	Sesterterpenoids
CASP-8	Resveratrol 4''-(6-galloylglucoside)	1.85272	0.127618	14.5177	1.96975e-36	1.04948e-32	Prenol lipids	Sesterterpenoids
ST1A1	Resveratrol 4''-(6-galloylglucoside)	3.45898	0.239056	14.4694	2.97312e-36	1.26726e-32	Prenol lipids	Sesterterpenoids
CXCL1	Resveratrol 4''-(6-galloylglucoside)	4.0944	0.310907	13.1692	1.73244e-31	6.15363e-28	Prenol lipids	Sesterterpenoids
CXCL6	Resveratrol 4''-(6-galloylglucoside)	3.06422	0.250801	12.2177	4.51705e-28	1.37525e-24	Prenol lipids	Sesterterpenoids
SIRT2	Triose	5.09702	0.452277	11.2697	9.45593e-25	2.51906e-21	Organooxygen compounds	Carbohydrates and carbohydrate conjugates
CXCL5	Resveratrol 4''-(6-galloylglucoside)	4.74856	0.423601	11.21	1.51909e-24	3.5972e-21	Prenol lipids	Sesterterpenoids
STAMBP	Triose	3.49449	0.314627	11.1067	3.43988e-24	7.33107e-21	Organooxygen compounds	Carbohydrates and carbohydrate conjugates
IL7	Resveratrol 4''-(6-galloylglucoside)	1.83957	0.169834	10.8315	2.99397e-23	5.80069e-20	Prenol lipids	Sesterterpenoids
AXIN1	Triose	4.35102	0.410982	10.5869	2.01044e-22	3.57055e-19	Organooxygen compounds	Carbohydrates and carbohydrate conjugates
CASP-8	Triose	2.40522	0.245962	9.77886	9.41559e-20	1.54358e-16	Organooxygen compounds	Carbohydrates and carbohydrate conjugates
ST1A1	Triose	4.41167	0.462958	9.5293	5.99653e-19	9.12843e-16	Organooxygen compounds	Carbohydrates and carbohydrate conjugates
CXCL1	Triose	5.47113	0.582183	9.39761	1.57738e-18	2.24113e-15	Organooxygen compounds	Carbohydrates and carbohydrate conjugates
MCP-4	Resveratrol 4''-(6-galloylglucoside)	1.83355	0.197898	9.26513	4.14392e-18	5.5197e-15	Prenol lipids	Sesterterpenoids
CXCL6	Triose	4.22196	0.459789	9.18239	7.54757e-18	9.46199e-15	Organooxygen compounds	Carbohydrates and carbohydrate conjugates
CXCL5	Triose	6.75246	0.761405	8.86842	7.15038e-17	8.46605e-14	Organooxygen compounds	Carbohydrates and carbohydrate conjugates
MCP-4	Triose	2.83964	0.343201	8.274	4.46793e-15	5.01161e-12	Organooxygen compounds	Carbohydrates and carbohydrate conjugates
FGF-21	Ethyl beta-D-glucopyranoside	1.38064	0.168157	8.21043	6.88359e-15	7.33516e-12	Organooxygen compounds	Carbohydrates and carbohydrate conjugates
TNFSF14	Resveratrol 4''-(6-galloylglucoside)	0.970162	0.118944	8.15648	9.91782e-15	1.00652e-11	Prenol lipids	Sesterterpenoids
IL7	Triose	2.50129	0.307378	8.13751	1.1273e-14	1.09205e-11	Organooxygen compounds	Carbohydrates and carbohydrate conjugates
AXIN1	Aminobutanoic acid (ABA)/3-Aminobutanoic acid	8.20383	1.02074	8.0371	2.21383e-14	2.05136e-11	Carboxylic acids and derivatives	Amino acids, peptides, and analogues
CASP-8	Aminobutanoic acid (ABA)/3-Aminobutanoic acid	4.57743	0.604568	7.57141	4.72883e-13	4.1992e-10	Carboxylic acids and derivatives	Amino acids, peptides, and analogues
ST1A1	Aminobutanoic acid (ABA)/3-Aminobutanoic acid	8.52711	1.13183	7.53395	6.01893e-13	5.13101e-10	Carboxylic acids and derivatives	Amino acids, peptides, and analogues
MCP-4	Heptadecanoic acid	1.59592	0.223731	7.13322	7.56414e-12	6.20027e-09	Fatty Acyls	Fatty acids and conjugates
4E-BP1	Resveratrol 4''-(6-galloylglucoside)	1.37178	0.193097	7.10409	9.05951e-12	7.15098e-09	Prenol lipids	Sesterterpenoids
SIRT2	Aminobutanoic acid (ABA)/3-Aminobutanoic acid	8.25806	1.16748	7.07342	1.09484e-11	8.3333e-09	Carboxylic acids and derivatives	Amino acids, peptides, and analogues
MCP-4	Gallic acid	-2.17626	0.311226	-6.99253	1.79949e-11	1.32244e-08	Benzene and substituted derivatives	Benzoic acids and derivatives
CD40	Resveratrol 4''-(6-galloylglucoside)	0.58599	0.0839068	6.98382	1.89791e-11	1.34827e-08	Prenol lipids	Sesterterpenoids
MCP-4	Brassinin	-1.2164	0.175136	-6.94548	2.39824e-11	1.64875e-08	Indoles and derivatives	Indoles
STAMBP	Aminobutanoic acid (ABA)/3-Aminobutanoic acid	5.6193	0.811031	6.92859	2.65785e-11	1.77013e-08	Carboxylic acids and derivatives	Amino acids, peptides, and analogues
LAP.TGF-beta-1	Resveratrol 4''-(6-galloylglucoside)	0.72982	0.108927	6.70006	1.04989e-10	6.78041e-08	Prenol lipids	Sesterterpenoids
MCP-4	Mangostenone B	2.33001	0.353563	6.59008	2.01043e-10	1.26018e-07	Benzopyrans	1-benzopyrans
MCP-4	Feruloylcholine	0.902194	0.139193	6.48162	3.7873e-10	2.30614e-07	Cinnamic acids and derivatives	Hydroxycinnamic acids and derivatives
MCP-4	Apigenin	-1.53904	0.241783	-6.36539	7.40391e-10	4.38311e-07	Flavonoids	Flavones
TNFSF14	Triose	1.32101	0.209392	6.30879	1.02297e-09	5.89231e-07	Organooxygen compounds	Carbohydrates and carbohydrate conjugates
CXCL11	Resveratrol 4''-(6-galloylglucoside)	1.61751	0.261349	6.18906	2.01319e-09	1.12908e-06	Prenol lipids	Sesterterpenoids
MCP-2	Gallic acid	-1.40852	0.227801	-6.1831	2.0817e-09	1.13757e-06	Benzene and substituted derivatives	Benzoic acids and derivatives
CD40	Triose	0.885676	0.144535	6.12777	2.83683e-09	1.51146e-06	Organooxygen compounds	Carbohydrates and carbohydrate conjugates
MMP-1	Resveratrol 4''-(6-galloylglucoside)	1.68457	0.27734	6.07401	3.82459e-09	1.98804e-06	Prenol lipids	Sesterterpenoids
FGF-21	Samin	2.77474	0.460878	6.02056	5.13745e-09	2.60689e-06	Benzodioxoles	NOT AVAILABLE
4E-BP1	Triose	1.99342	0.334455	5.9602	7.15289e-09	3.54517e-06	Organooxygen compounds	Carbohydrates and carbohydrate conjugates
MCP-1	5''''-(4-Hydroxy-(E)-cinnamoyl) alpha-L-arabinofuranosyl-(1->3)-beta-D-xylopyranosyl-(1->4)-D-xylopyranoside	0.553798	0.0935805	5.91788	9.00816e-09	4.26627e-06	Organooxygen compounds	Carbohydrates and carbohydrate conjugates
MCP-4	5''''-(4-Hydroxy-(E)-cinnamoyl) alpha-L-arabinofuranosyl-(1->3)-beta-D-xylopyranosyl-(1->4)-D-xylopyranoside	0.88977	0.150309	5.91961	8.92383e-09	4.26627e-06	Organooxygen compounds	Carbohydrates and carbohydrate conjugates
CXCL11	Triose	2.6243	0.445175	5.89498	1.01998e-08	4.72559e-06	Organooxygen compounds	Carbohydrates and carbohydrate conjugates
MCP-4	(-)-Dioxibrassinin	-2.35624	0.402417	-5.85523	1.26452e-08	5.73391e-06	Carboxylic acids and derivatives	Amino acids, peptides, and analogues
MCP-4	4'',5,6-Trimethylscutellarein 7-glucoside	2.1106	0.361016	5.84628	1.32698e-08	5.89181e-06	Anthracenes	Anthraquinones
MCP-4	1-(5Z,8Z,11Z,14Z-eicosatetraenoyl)-sn-glycero-3-phosphate	-1.58393	0.271796	-5.82764	1.4669e-08	6.38013e-06	Glycerophospholipids	Glycerophosphates
4E-BP1	Artonin D	1.61176	0.278694	5.78327	1.86062e-08	7.93071e-06	Linear 1,3-diarylpropanoids	Chalcones and dihydrochalcones
MCP-4	1-(11Z-eicosenoyl)-glycero-3-phosphate	-1.82168	0.315251	-5.7785	1.90861e-08	7.97576e-06	Glycerophospholipids	Glycerophosphates
MCP-4	1,6-Dihydroxy-3,7-dimethoxy-2-(3-methyl-2-butenyl)-8-(3-hydroxy-3-methyl-1E-butenyl)-xanthone	1.09634	0.191101	5.73697	2.38096e-08	9.75829e-06	Benzopyrans	1-benzopyrans
MCP-4	Sorgoleone 358	1.42526	0.2486	5.73312	2.43008e-08	9.77166e-06	Organooxygen compounds	Carbonyl compounds
CXCL5	Aminobutanoic acid (ABA)/3-Aminobutanoic acid	10.7427	1.89994	5.65423	3.68587e-08	1.45469e-05	Carboxylic acids and derivatives	Amino acids, peptides, and analogues
MCP-1	Feruloylcholine	0.496195	0.087997	5.63876	3.99757e-08	1.54902e-05	Cinnamic acids and derivatives	Hydroxycinnamic acids and derivatives
FGF-21	Syndesine	2.04503	0.364738	5.60684	4.7242e-08	1.7979e-05	Carboxylic acids and derivatives	Amino acids, peptides, and analogues
CXCL6	Gallic acid	-2.42731	0.437579	-5.54713	6.44364e-08	2.3677e-05	Benzene and substituted derivatives	Benzoic acids and derivatives
MCP-2	Resveratrol 4''-(6-galloylglucoside)	0.855159	0.15414	5.54794	6.41684e-08	2.3677e-05	Prenol lipids	Sesterterpenoids
MCP-4	Murrayanol	1.49509	0.27279	5.48076	9.07238e-08	3.27713e-05	Indoles and derivatives	Carbazoles
MCP-4	1-O-Galloylglycerol	-1.70104	0.312038	-5.45137	1.05457e-07	3.74582e-05	Benzene and substituted derivatives	Benzoic acids and derivatives
MCP-1	4'',5,6-Trimethylscutellarein 7-glucoside	1.22916	0.226373	5.42981	1.17721e-07	4.1129e-05	Anthracenes	Anthraquinones
LAP.TGF-beta-1	Triose	1.02421	0.188897	5.42207	1.22454e-07	4.20925e-05	Organooxygen compounds	Carbohydrates and carbohydrate conjugates
MCP-4	Oxobutanoic acid	-4.99127	0.924711	-5.39765	1.38624e-07	4.54516e-05	Keto acids and derivatives	Short-chain keto acids and derivatives
MCP-4	2-O-(Z-p-Hydroxycinnamoyl)-(x)-glyceric acid	-2.30487	0.426998	-5.39786	1.38478e-07	4.54516e-05	Cinnamic acids and derivatives	Hydroxycinnamic acids and derivatives
MCP-2	Triose	1.41425	0.261799	5.40207	1.35556e-07	4.54516e-05	Organooxygen compounds	Carbohydrates and carbohydrate conjugates
MCP-4	KB 2	1.10501	0.205764	5.37026	1.59243e-07	5.14209e-05	Flavonoids	Flavones
MCP-4	3-Methylcyclopentadecanone	1.0502	0.196026	5.35745	1.69883e-07	5.4038e-05	Organooxygen compounds	Carbonyl compounds
MCP-4	LysoPE(0:0/20:0)	-1.2751	0.239064	-5.33371	1.91446e-07	6.00016e-05	Glycerophospholipids	Glycerophosphoethanolamines
MCP-4	2-Methoxynaphthalene	-1.40087	0.262907	-5.32839	1.9663e-07	6.07329e-05	Naphthalenes	NOT AVAILABLE
MCP-1	Brassinin	-0.598031	0.112328	-5.32397	2.01048e-07	6.12106e-05	Indoles and derivatives	Indoles
MCP-4	Lyciumin A	-1.27924	0.242657	-5.27179	2.60968e-07	7.83345e-05	2-arylbenzofuran flavonoids	NOT AVAILABLE
MCP-2	Oxobutanoic acid	-3.51502	0.667758	-5.26391	2.71412e-07	7.95104e-05	Keto acids and derivatives	Short-chain keto acids and derivatives
MCP-4	[6]-Gingerdiol 3,5-diacetate	0.902931	0.171555	5.26322	2.72347e-07	7.95104e-05	Fatty Acyls	Fatty alcohol esters
CXCL1	Gallic acid	-2.93658	0.559756	-5.24618	2.96418e-07	8.53684e-05	Benzene and substituted derivatives	Benzoic acids and derivatives
CX3CL1	Cyanidin 3-(6-caffeoylglucoside) 5-glucoside	-0.776221	0.149273	-5.20002	3.72436e-07	0.000104793	Flavonoids	Flavonoid glycosides
MCP-4	1-Phenyl-1,3-heptadecanedione	1.17757	0.226484	5.19933	3.73699e-07	0.000104793	Organooxygen compounds	Carbonyl compounds
MCP-4	Curcumin	-1.84771	0.358148	-5.15906	4.55473e-07	0.000126066	Diarylheptanoids	Linear diarylheptanoids
MCP-4	3-hydroxynonanoyl carnitine	0.634097	0.123114	5.15049	4.74984e-07	0.00012978	Fatty Acyls	Fatty acid esters
MCP-1	(-)-Dioxibrassinin	-1.30275	0.25358	-5.13742	5.06314e-07	0.000136589	Carboxylic acids and derivatives	Amino acids, peptides, and analogues
MCP-1	Lyciumin A	-0.771376	0.151509	-5.0913	6.33709e-07	0.000167425	2-arylbenzofuran flavonoids	NOT AVAILABLE
MCP-2	1-Phenyl-1,3-heptadecanedione	0.832159	0.163475	5.09045	6.36327e-07	0.000167425	Organooxygen compounds	Carbonyl compounds
CXCL1	Aminobutanoic acid (ABA)/3-Aminobutanoic acid	7.52952	1.48565	5.06815	7.08843e-07	0.00018423	Carboxylic acids and derivatives	Amino acids, peptides, and analogues
SCF	LysoPE(0:0/20:2(11Z,14Z))	0.372598	0.0737907	5.04939	7.76e-07	0.000199254	Glycerophospholipids	Glycerophosphoethanolamines
MCP-4	Alpha-Linolenic acid	0.620012	0.123613	5.01576	9.12143e-07	0.00022937	Fatty Acyls	Lineolic acids and derivatives
MCP-2	Murrayanol	0.99323	0.198046	5.01515	9.14809e-07	0.00022937	Indoles and derivatives	Carbazoles
MCP-4	(S)-[8]-Gingerol	0.45793	0.0916533	4.99633	1.00104e-06	0.000248072	Phenols	Methoxyphenols
MCP-4	Myricanol 5-glucoside	-1.47952	0.296303	-4.99326	1.01583e-06	0.000248749	Lactones	Gamma butyrolactones
MCP-2	3-hydroxynonanoyl carnitine	0.443854	0.0889319	4.99094	1.02712e-06	0.000248749	Fatty Acyls	Fatty acid esters
MCP-1	1-O-Galloylglycerol	-0.974587	0.195752	-4.97867	1.08903e-06	0.000260366	Benzene and substituted derivatives	Benzoic acids and derivatives
MCP-2	Heptadecanoic acid	0.834294	0.167641	4.97666	1.09952e-06	0.000260366	Fatty Acyls	Fatty acids and conjugates
MCP-4	Kanzonol F	1.11931	0.225117	4.97214	1.12346e-06	0.000263112	Isoflavonoids	Furanoisoflavonoids
CCL4	Gallic acid	-1.13631	0.229232	-4.95702	1.20718e-06	0.000279645	Benzene and substituted derivatives	Benzoic acids and derivatives
MCP-2	[6]-Gingerdiol 3,5-diacetate	0.614339	0.124237	4.94488	1.2788e-06	0.000289934	Fatty Acyls	Fatty alcohol esters
MCP-4	Albanin B	1.23114	0.248865	4.94704	1.26574e-06	0.000289934	Flavonoids	Flavones
MCP-1	Ethyl cinnamate	1.69051	0.342535	4.93528	1.33827e-06	0.000300222	Cinnamic acids and derivatives	Cinnamic acid esters
MCP-1	14,16-Nonacosanedione	0.768844	0.156093	4.92557	1.40119e-06	0.000311063	Organooxygen compounds	Carbonyl compounds
MMP-1	LysoPE(0:0/20:0)	-1.54889	0.314892	-4.9188	1.44673e-06	0.000317862	Glycerophospholipids	Glycerophosphoethanolamines
LAP.TGF-beta-1	Cyanidin 3-(6-caffeoylglucoside) 5-glucoside	-0.841997	0.171257	-4.91658	1.46194e-06	0.000317928	Flavonoids	Flavonoid glycosides
MCP-4	FAHFA(18:0/9-O-18:0)	0.64211	0.130932	4.90415	1.55016e-06	0.000333707	Fatty Acyls	Fatty acids and conjugates
CCL4	Resveratrol 4''-(6-galloylglucoside)	0.752435	0.1535	4.90187	1.56687e-06	0.000333932	Prenol lipids	Sesterterpenoids
MMP-1	Oxobutanoic acid	-5.96954	1.21977	-4.89399	1.62606e-06	0.000340028	Keto acids and derivatives	Short-chain keto acids and derivatives
MCP-4	3-Hydroxymugineic acid	0.216	0.0441372	4.89382	1.62738e-06	0.000340028	Carboxylic acids and derivatives	Amino acids, peptides, and analogues
MCP-4	Marcanine A	-2.50589	0.512334	-4.89111	1.64822e-06	0.000341038	Quinolines and derivatives	Benzoquinolines
MCP-4	(2S,4S)-Monatin	-1.03893	0.214256	-4.84901	2.00763e-06	0.00041141	Carboxylic acids and derivatives	Amino acids, peptides, and analogues
MCP-4	Methylpicraquassioside A	0.960617	0.198681	4.83497	2.1434e-06	0.000435049	Organooxygen compounds	Carbohydrates and carbohydrate conjugates
MMP-1	1-Propenyl 1-(1-propenylthio)propyl disulfide	-1.94363	0.40466	-4.80311	2.48537e-06	0.000499699	Thioethers	Thioenol ethers
CXCL6	Brassinin	-1.19468	0.248972	-4.79845	2.53963e-06	0.000505838	Indoles and derivatives	Indoles
MCP-2	Lyciumin A	-0.843296	0.176177	-4.78665	2.68208e-06	0.000529263	2-arylbenzofuran flavonoids	NOT AVAILABLE
MCP-4	3-hydroxyundecanoyl carnitine	0.599737	0.125383	4.78325	2.72463e-06	0.000532727	Fatty Acyls	Fatty acid esters
MCP-4	6-Prenylnaringenin	0.280209	0.0586341	4.77895	2.77922e-06	0.00053846	Flavonoids	Flavans
MMP-1	3-Hydroxymyristate	1.93396	0.405274	4.77198	2.87005e-06	0.000551049	Fatty Acyls	Fatty acids and conjugates
MCP-2	Brassinin	-0.624549	0.131156	-4.76187	3.00685e-06	0.00057216	Indoles and derivatives	Indoles
CXCL6	(-)-Dioxibrassinin	-2.66077	0.560811	-4.7445	3.25675e-06	0.000611388	Carboxylic acids and derivatives	Amino acids, peptides, and analogues
MCP-2	Sorgoleone 358	0.863421	0.182018	4.74359	3.27038e-06	0.000611388	Organooxygen compounds	Carbonyl compounds
MCP-2	Shoyuflavone C	-4.79247	1.01113	-4.7397	3.32921e-06	0.000611656	Isoflavonoids	Isoflav-2-enes
HGF	Somniferine	-0.338082	0.0713202	-4.74034	3.31955e-06	0.000611656	Morphinans	NOT AVAILABLE
MCP-4	Distichonic acid A	-1.13328	0.239335	-4.73511	3.4e-06	0.000619322	Carboxylic acids and derivatives	Amino acids, peptides, and analogues
MCP-1	Myricanol 5-glucoside	-0.876346	0.185204	-4.73178	3.45228e-06	0.000623518	Lactones	Gamma butyrolactones
MCP-2	Methylpicraquassioside A	0.67806	0.143386	4.72893	3.49766e-06	0.000626405	Organooxygen compounds	Carbohydrates and carbohydrate conjugates
CXCL5	Gallic acid	-3.44028	0.728729	-4.72094	3.62797e-06	0.000636776	Benzene and substituted derivatives	Benzoic acids and derivatives
MMP-1	1-(11Z-eicosenoyl)-glycero-3-phosphate	-1.97934	0.419676	-4.71634	3.70497e-06	0.000636776	Glycerophospholipids	Glycerophosphates
MCP-4	LysoPE(0:0/20:1(11Z))	-1.06202	0.22513	-4.71735	3.68783e-06	0.000636776	Glycerophospholipids	Glycerophosphoethanolamines
MCP-2	1-Propenyl 1-(1-propenylthio)propyl disulfide	-1.0537	0.223093	-4.72315	3.59146e-06	0.000636776	Thioethers	Thioenol ethers
MMP-1	Triose	2.26758	0.480574	4.71849	3.66879e-06	0.000636776	Organooxygen compounds	Carbohydrates and carbohydrate conjugates
MCP-1	3,​4-​Dimethyl-​5-​pentyl-2-​furantridecanoic acid	0.777932	0.165055	4.71316	3.75909e-06	0.00064091	Fatty Acyls	Fatty acids and conjugates
MCP-2	(S)-[8]-Gingerol	0.311852	0.0663365	4.70106	3.97246e-06	0.000671914	Phenols	Methoxyphenols
MCP-1	Cyanidin 3-(6-caffeoylglucoside) 5-glucoside	-0.965797	0.205694	-4.69531	4.07778e-06	0.000684297	Flavonoids	Flavonoid glycosides
MCP-1	Apigenin	-0.72654	0.154844	-4.69208	4.13816e-06	0.000689004	Flavonoids	Flavones
MCP-4	3-Hydroxymyristate	1.45417	0.310099	4.68938	4.18936e-06	0.000692121	Fatty Acyls	Fatty acids and conjugates
MCP-4	14,16-Nonacosanedione	1.17449	0.251703	4.66617	4.6548e-06	0.0007631	Organooxygen compounds	Carbonyl compounds
CX3CL1	Hv-NCC-1	-0.808035	0.173556	-4.65576	4.87933e-06	0.000793804	Tetrapyrroles and derivatives	NOT AVAILABLE
MCP-2	Feruloylcholine	0.480502	0.103472	4.64377	5.15099e-06	0.00083165	Cinnamic acids and derivatives	Hydroxycinnamic acids and derivatives
CXCL11	Gallic acid	-1.86053	0.400796	-4.64209	5.19023e-06	0.000831686	Benzene and substituted derivatives	Benzoic acids and derivatives
MMP-1	Shoyuflavone C	-8.52866	1.83901	-4.63763	5.29555e-06	0.00084223	Isoflavonoids	Isoflav-2-enes
CXCL6	Myricanol 5-glucoside	-1.88886	0.407714	-4.6328	5.4121e-06	0.00085439	Lactones	Gamma butyrolactones
MCP-4	Histidine	0.812722	0.175915	4.61997	5.73382e-06	0.000891964	Carboxylic acids and derivatives	Amino acids, peptides, and analogues
MCP-4	Phenylethyl primeveroside	1.31782	0.285149	4.62151	5.69403e-06	0.000891964	Organooxygen compounds	Carbohydrates and carbohydrate conjugates
MCP-4	Naringenin	-0.864719	0.187387	-4.61463	5.873e-06	0.000906996	Flavonoids	Flavans
LIF-R	Erucic acid	-0.265654	0.0578228	-4.59428	6.43398e-06	0.000986482	Fatty Acyls	Fatty acids and conjugates
MCP-2	Alpha-Linolenic acid	0.41167	0.0896373	4.59261	6.48202e-06	0.000986749	Fatty Acyls	Lineolic acids and derivatives
LIF-R	Heptadecanoic acid	-0.302251	0.0659058	-4.58611	6.67333e-06	0.00100867	Fatty Acyls	Fatty acids and conjugates
MCP-4	Torvanol A	0.546032	0.119228	4.57972	6.86645e-06	0.00103055	Isoflavonoids	O-methylated isoflavonoids
MCP-2	Marcanine A	-1.69635	0.370904	-4.57356	7.05772e-06	0.00105185	Quinolines and derivatives	Benzoquinolines
OSM	Protogonyautoxin I	-1.68605	0.369192	-4.56688	7.27114e-06	0.00107443	Saxitoxins, gonyautoxins, and derivatives	NOT AVAILABLE
SCF	Syndesine	-0.382511	0.0838082	-4.56412	7.36095e-06	0.00107443	Carboxylic acids and derivatives	Amino acids, peptides, and analogues
MCP-1	Torvanol A	0.338926	0.0742435	4.56505	7.33038e-06	0.00107443	Isoflavonoids	O-methylated isoflavonoids
TNFSF14	C24:6	0.535697	0.117436	4.56161	7.44374e-06	0.00107443	Fatty Acyls	Fatty acyl thioesters
MCP-2	1,6-Dihydroxy-3,7-dimethoxy-2-(3-methyl-2-butenyl)-8-(3-hydroxy-3-methyl-1E-butenyl)-xanthone	0.639932	0.140303	4.56108	7.4613e-06	0.00107443	Benzopyrans	1-benzopyrans
MMP-1	Gallic acid	-1.93455	0.424974	-4.55215	7.76339e-06	0.00110302	Benzene and substituted derivatives	Benzoic acids and derivatives
FGF-21	Phenylethyl alcohol	3.86577	0.849007	4.55329	7.72418e-06	0.00110302	Benzene and substituted derivatives	NOT AVAILABLE
CXCL6	1-(11Z-eicosenoyl)-glycero-3-phosphate	-2.00171	0.439997	-4.54937	7.8599e-06	0.00110934	Glycerophospholipids	Glycerophosphates
MCP-1	Oxobutanoic acid	-2.64852	0.583395	-4.53985	8.19896e-06	0.00114948	Keto acids and derivatives	Short-chain keto acids and derivatives
MCP-4	7-Hydroxy-5-(4-hydroxy-2-oxopentyl)-2-methylchromone 7-glucoside	0.489823	0.107929	4.53839	8.25216e-06	0.00114948	Organooxygen compounds	Carbohydrates and carbohydrate conjugates
CXCL5	Heptadecanoic acid	2.38507	0.526855	4.527	8.67876e-06	0.00120105	Fatty Acyls	Fatty acids and conjugates
MCP-2	1-(2-Thienyl)-1,2-propanedione	-3.56335	0.788622	-4.51845	9.01319e-06	0.00123928	Organooxygen compounds	Carbonyl compounds
FGF-21	7-Methoxy-2-methylisoflavone	2.01528	0.446973	4.50872	9.40844e-06	0.00128534	Isoflavonoids	O-methylated isoflavonoids
MCP-4	1-(2-Thienyl)-1,2-propanedione	-4.93285	1.09468	-4.50621	9.51322e-06	0.00129137	Organooxygen compounds	Carbonyl compounds
CXCL1	2-Methoxynaphthalene	-2.08604	0.463842	-4.4973	9.89388e-06	0.00131786	Naphthalenes	NOT AVAILABLE
MCP-2	(-)-Dioxibrassinin	-1.33271	0.296333	-4.49735	9.8917e-06	0.00131786	Carboxylic acids and derivatives	Amino acids, peptides, and analogues
LAP.TGF-beta-1	Gallic acid	-0.760377	0.169035	-4.49835	9.84813e-06	0.00131786	Benzene and substituted derivatives	Benzoic acids and derivatives
MCP-1	Hv-NCC-1	-1.06441	0.237922	-4.47376	1.0971e-05	0.00145226	Tetrapyrroles and derivatives	NOT AVAILABLE
MMP-1	L-1,2,3,4-Tetrahydro-beta-carboline-3-carboxylic acid	-1.46035	0.32664	-4.4708	1.11142e-05	0.00146213	Indoles and derivatives	Pyridoindoles
MCP-1	Pectenotoxin 2	-1.02752	0.230026	-4.46697	1.13025e-05	0.00146877	Macrolides and analogues	Pectenotoxins and derivatives
SCF	1-(8Z,11Z,14Z-eicosatrienoyl)-glycero-3-phosphate	0.457322	0.102373	4.46721	1.12904e-05	0.00146877	Glycerophospholipids	Glycerophospholipids
MCP-2	Neferine	-0.884241	0.198486	-4.45492	1.19136e-05	0.0015388	Isoquinolines and derivatives	Benzylisoquinolines
HGF	Protogonyautoxin I	-0.674892	0.151761	-4.44708	1.23282e-05	0.00156168	Saxitoxins, gonyautoxins, and derivatives	NOT AVAILABLE
VEGFA	Somniferine	-0.297952	0.0670215	-4.44561	1.24077e-05	0.00156168	Morphinans	NOT AVAILABLE
CSF-1	LysoPE(0:0/20:0)	-0.276781	0.0622442	-4.4467	1.23489e-05	0.00156168	Glycerophospholipids	Glycerophosphoethanolamines
CCL4	Triose	1.16374	0.261827	4.4447	1.24571e-05	0.00156168	Organooxygen compounds	Carbohydrates and carbohydrate conjugates
CXCL5	Sorgoleone 358	2.53694	0.570674	4.44552	1.24123e-05	0.00156168	Organooxygen compounds	Carbonyl compounds
TNFSF14	Gallic acid	-0.842808	0.190548	-4.42307	1.36861e-05	0.00170572	Benzene and substituted derivatives	Benzoic acids and derivatives
MMP-1	(-)-Dioxibrassinin	-2.38152	0.538733	-4.4206	1.38338e-05	0.00171411	Carboxylic acids and derivatives	Amino acids, peptides, and analogues
MCP-2	1-O-Galloylglycerol	-1.00732	0.22847	-4.40898	1.45487e-05	0.00178001	Benzene and substituted derivatives	Benzoic acids and derivatives
MCP-4	C24:6	0.886029	0.200962	4.40894	1.45512e-05	0.00178001	Fatty Acyls	Fatty acyl thioesters
MCP-4	2'',4,4''-Trihydroxy-6''-methoxy-3'',5''-diprenylchalcone	1.63637	0.371235	4.40791	1.46163e-05	0.00178001	Linear 1,3-diarylpropanoids	Chalcones and dihydrochalcones
MCP-4	Shoyuflavone C	-6.21029	1.41011	-4.40413	1.48573e-05	0.0017809	Isoflavonoids	Isoflav-2-enes
MCP-2	7-Hydroxy-5-(4-hydroxy-2-oxopentyl)-2-methylchromone 7-glucoside	0.343128	0.0779152	4.40387	1.48742e-05	0.0017809	Organooxygen compounds	Carbohydrates and carbohydrate conjugates
MCP-1	3-Hydroxymyristate	0.853931	0.193847	4.40518	1.47899e-05	0.0017809	Fatty Acyls	Fatty acids and conjugates
TNFSF14	LysoPE(0:0/20:2(11Z,14Z))	-0.491287	0.111942	-4.38877	1.5877e-05	0.00189034	Glycerophospholipids	Glycerophosphoethanolamines
HGF	Gallic acid	-0.555961	0.127261	-4.36866	1.73136e-05	0.00204993	Benzene and substituted derivatives	Benzoic acids and derivatives
MCP-4	Hydrocortamate	1.37042	0.314639	4.35552	1.83184e-05	0.00215692	Steroids and steroid derivatives	Pregnane steroids
MCP-2	4'',5,6-Trimethylscutellarein 7-glucoside	1.15561	0.266398	4.33792	1.97528e-05	0.00231303	Anthracenes	Anthraquinones
FGF-21	Diacetoxyscirpenol	3.06462	0.70692	4.33517	1.99865e-05	0.00232761	Prenol lipids	Sesquiterpenoids
MCP-1	D-erythro-L-galacto-Nonulose	-0.346627	0.0800013	-4.33276	2.0193e-05	0.00233887	Organooxygen compounds	Carbohydrates and carbohydrate conjugates
CXCL6	Lyciumin A	-1.45459	0.336879	-4.31785	2.15198e-05	0.00247908	2-arylbenzofuran flavonoids	NOT AVAILABLE
DNER	Feruloylcholine	-0.164185	0.0381697	-4.30145	2.30745e-05	0.00264389	Cinnamic acids and derivatives	Hydroxycinnamic acids and derivatives
CCL4	(-)-Dioxibrassinin	-1.25853	0.292853	-4.29749	2.34655e-05	0.00267101	Carboxylic acids and derivatives	Amino acids, peptides, and analogues
MCP-2	N-Hexadecanoylpyrrolidine	0.691835	0.161022	4.29652	2.35618e-05	0.00267101	Pyrrolidines	N-acylpyrrolidines
MCP-2	L-1,2,3,4-Tetrahydro-beta-carboline-3-carboxylic acid	-0.774199	0.180308	-4.29375	2.38402e-05	0.00268827	Indoles and derivatives	Pyridoindoles
CXCL11	LysoPE(0:0/20:0)	-1.28491	0.300126	-4.28125	2.51373e-05	0.00281961	Glycerophospholipids	Glycerophosphoethanolamines
EN-RAGE	1-Arachidonoylglycerophosphoinositol	0.778839	0.181999	4.27936	2.53392e-05	0.00282738	Glycerophospholipids	Glycerophosphates
CXCL6	2-Methoxynaphthalene	-1.56171	0.365559	-4.27212	2.61266e-05	0.00290006	Naphthalenes	NOT AVAILABLE
LIF-R	1-heptadecanoyl-glycero-3-phosphate	-0.332416	0.0780679	-4.25804	2.77247e-05	0.00305346	Glycerophospholipids	Glycerophosphates
LIF-R	3-hydroxyundecanoyl carnitine	-0.151429	0.0355765	-4.25644	2.79129e-05	0.00305346	Fatty Acyls	Fatty acid esters
CXCL5	[6]-Gingerdiol 3,5-diacetate	1.66729	0.39173	4.25622	2.79384e-05	0.00305346	Fatty Acyls	Fatty alcohol esters
CXCL10	Murrayanol	1.02138	0.24041	4.24848	2.88632e-05	0.00313843	Indoles and derivatives	Carbazoles
CXCL6	Cyanidin 3-(6-caffeoylglucoside) 5-glucoside	-1.92703	0.455116	-4.23414	3.06552e-05	0.00331636	Flavonoids	Flavonoid glycosides
CXCL10	Gallic acid	-1.19372	0.282173	-4.23046	3.11318e-05	0.00335092	Benzene and substituted derivatives	Benzoic acids and derivatives
MCP-4	Theogallin	-2.13403	0.505271	-4.22354	3.20479e-05	0.00341613	Organooxygen compounds	Alcohols and polyols
IL18	Glycine	-0.815923	0.193188	-4.22346	3.20583e-05	0.00341613	Carboxylic acids and derivatives	Amino acids, peptides, and analogues
MCP-4	Hv-NCC-1	-1.61667	0.383528	-4.21527	3.3175e-05	0.00350447	Tetrapyrroles and derivatives	NOT AVAILABLE
CXCL6	Feruloylcholine	0.83336	0.197714	4.21497	3.32162e-05	0.00350447	Cinnamic acids and derivatives	Hydroxycinnamic acids and derivatives
MCP-4	Cyanidin 3-(6-caffeoylglucoside) 5-glucoside	-1.39985	0.332673	-4.20788	3.42147e-05	0.00353973	Flavonoids	Flavonoid glycosides
TNFSF14	(-)-Dioxibrassinin	-1.01779	0.241814	-4.20899	3.4057e-05	0.00353973	Carboxylic acids and derivatives	Amino acids, peptides, and analogues
MCP-2	(2S,4S)-Monatin	-0.655858	0.155798	-4.20966	3.39622e-05	0.00353973	Carboxylic acids and derivatives	Amino acids, peptides, and analogues
MCP-2	C24:6	0.611366	0.145195	4.21065	3.38219e-05	0.00353973	Fatty Acyls	Fatty acyl thioesters
CXCL10	Licoagrodin	-1.46345	0.348344	-4.20115	3.51894e-05	0.00362298	Flavonoids	Flavans
CXCL11	Oxobutanoic acid	-4.88298	1.16345	-4.19698	3.58056e-05	0.0036606	Keto acids and derivatives	Short-chain keto acids and derivatives
CXCL10	Methylpicraquassioside A	0.727551	0.173424	4.19521	3.60701e-05	0.0036606	Organooxygen compounds	Carbohydrates and carbohydrate conjugates
CXCL11	4'',5,6-Trimethylscutellarein 7-glucoside	1.92061	0.457739	4.19587	3.59724e-05	0.0036606	Anthracenes	Anthraquinones
CCL4	Feruloylcholine	0.428802	0.102639	4.17777	3.87825e-05	0.00391722	Cinnamic acids and derivatives	Hydroxycinnamic acids and derivatives
IL6	LysoPE(0:0/20:2(11Z,14Z))	-0.847706	0.203016	-4.17556	3.91402e-05	0.00393469	Glycerophospholipids	Glycerophosphoethanolamines
MCP-2	1-(8Z,11Z,14Z-eicosatrienoyl)-glycero-3-phosphate	-0.792646	0.189982	-4.17222	3.96861e-05	0.00397085	Glycerophospholipids	Glycerophospholipids
EN-RAGE	Glycine	-0.80543	0.193147	-4.17004	4.00457e-05	0.0039881	Carboxylic acids and derivatives	Amino acids, peptides, and analogues
CXCL11	Myricanol 5-glucoside	-1.54323	0.370544	-4.16476	4.09305e-05	0.00403847	Lactones	Gamma butyrolactones
MCP-2	3-hydroxyundecanoyl carnitine	0.379656	0.0911364	4.1658	4.0755e-05	0.00403847	Fatty Acyls	Fatty acid esters
MCP-2	Theogallin	-1.51586	0.364377	-4.16015	4.1719e-05	0.00409731	Organooxygen compounds	Alcohols and polyols
MCP-1	LysoPE(0:0/20:0)	-0.629882	0.15146	-4.15873	4.19642e-05	0.00410248	Glycerophospholipids	Glycerophosphoethanolamines
TNFSF14	L-1,2,3,4-Tetrahydro-beta-carboline-3-carboxylic acid	-0.6092	0.146836	-4.14885	4.37126e-05	0.00423456	Indoles and derivatives	Pyridoindoles
CX3CL1	Lyciumin A	-0.46617	0.112339	-4.14966	4.35664e-05	0.00423456	2-arylbenzofuran flavonoids	NOT AVAILABLE
IL7	Aminobutanoic acid (ABA)/3-Aminobutanoic acid	3.1935	0.771852	4.13745	4.58163e-05	0.00441827	Carboxylic acids and derivatives	Amino acids, peptides, and analogues
VEGFA	Divanillyltetrahydrofuran ferulate	-0.54131	0.130935	-4.1342	4.64333e-05	0.0044576	Furanoid lignans	Tetrahydrofuran lignans
DNER	Mangostenone B	-0.402471	0.0973778	-4.13309	4.6645e-05	0.00445784	Benzopyrans	1-benzopyrans
CSF-1	Cyanidin 3-(6-caffeoylglucoside) 5-glucoside	-0.35327	0.0855396	-4.12991	4.72602e-05	0.00449647	Flavonoids	Flavonoid glycosides
TNFSF14	1-Propenyl 1-(1-propenylthio)propyl disulfide	-0.754038	0.182854	-4.12372	4.84777e-05	0.00459181	Thioethers	Thioenol ethers
CXCL6	Oxobutanoic acid	-5.31271	1.28988	-4.11877	4.94719e-05	0.00466525	Keto acids and derivatives	Short-chain keto acids and derivatives
MCP-4	N-Hexadecanoylpyrrolidine	0.921895	0.224018	4.11528	5.0186e-05	0.00471174	Pyrrolidines	N-acylpyrrolidines
MCP-4	Erucic acid	0.849998	0.206697	4.11229	5.08039e-05	0.00474883	Fatty Acyls	Fatty acids and conjugates
MCP-1	Naringenin	-0.482904	0.117478	-4.11059	5.11589e-05	0.00476113	Flavonoids	Flavans
CSF-1	Dicyclohexyl disulfide	0.199559	0.0485938	4.10667	5.19875e-05	0.0048162	Organic disulfides	Dialkyldisulfides
CXCL1	C24:6	1.44316	0.351504	4.10566	5.22027e-05	0.0048162	Fatty Acyls	Fatty acyl thioesters
CX3CL1	LysoPE(0:0/20:0)	-0.454636	0.110859	-4.10102	5.32023e-05	0.00488728	Glycerophospholipids	Glycerophosphoethanolamines
CXCL6	LysoPE(0:0/20:0)	-1.36469	0.33322	-4.09545	5.44267e-05	0.00497829	Glycerophospholipids	Glycerophosphoethanolamines
FGF-21	(Iso)Leucine	-2.76074	0.674552	-4.09269	5.50431e-05	0.00501315	Carboxylic acids and derivatives	Amino acids, peptides, and analogues
CXCL11	Cyanidin 3-(6-caffeoylglucoside) 5-glucoside	-1.684	0.411721	-4.09015	5.56167e-05	0.00504089	Flavonoids	Flavonoid glycosides
TNFSF14	Protogonyautoxin I	-0.934442	0.228511	-4.08926	5.58206e-05	0.00504089	Saxitoxins, gonyautoxins, and derivatives	NOT AVAILABLE
MCP-2	gamma-Glutamyl-beta-(isoxazolin-5-on-2-yl)alanine	-0.788123	0.192835	-4.08703	5.63306e-05	0.00506548	Carboxylic acids and derivatives	Amino acids, peptides, and analogues
CXCL6	1-(5Z,8Z,11Z,14Z-eicosatetraenoyl)-sn-glycero-3-phosphate	-1.56032	0.382109	-4.08344	5.716e-05	0.00507581	Glycerophospholipids	Glycerophosphates
TNFSF14	Neferine	-0.662123	0.16214	-4.08365	5.71118e-05	0.00507581	Isoquinolines and derivatives	Benzylisoquinolines
MMP-1	4'',5,6-Trimethylscutellarein 7-glucoside	1.98287	0.485433	4.08474	5.68575e-05	0.00507581	Anthracenes	Anthraquinones
LAP.TGF-beta-1	Divanillyltetrahydrofuran ferulate	-0.759354	0.186344	-4.07502	5.91535e-05	0.0052161	Furanoid lignans	Tetrahydrofuran lignans
EN-RAGE	1-Oleoylglycerophosphoinositol	0.668945	0.16417	4.0747	5.92293e-05	0.0052161	Glycerophospholipids	Glycerophosphoinositols
OSM	Threonine	-0.899675	0.220913	-4.07253	5.97555e-05	0.00522988	Carboxylic acids and derivatives	Amino acids, peptides, and analogues
CSF-1	1-[(2,5-Dimethylphenyl)azo]-2-naphthalenol	0.113413	0.0278517	4.07203	5.98766e-05	0.00522988	Naphthalenes	Naphthols and derivatives
OSM	Glycine	-1.0139	0.249331	-4.0665	6.12383e-05	0.00528237	Carboxylic acids and derivatives	Amino acids, peptides, and analogues
MMP-1	Somniferine	-0.980243	0.241039	-4.06675	6.11765e-05	0.00528237	Morphinans	NOT AVAILABLE
MCP-1	(2S,4S)-Monatin	-0.548353	0.134871	-4.06576	6.14213e-05	0.00528237	Carboxylic acids and derivatives	Amino acids, peptides, and analogues
LIF-R	1,6-Dihydroxy-3,7-dimethoxy-2-(3-methyl-2-butenyl)-8-(3-hydroxy-3-methyl-1E-butenyl)-xanthone	-0.224459	0.0552097	-4.06557	6.1469e-05	0.00528237	Benzopyrans	1-benzopyrans
CCL4	Marcanine A	-1.49535	0.368101	-4.06233	6.22827e-05	0.0053308	Quinolines and derivatives	Benzoquinolines
MCP-1	Distichonic acid A	-0.610498	0.150414	-4.0588	6.3182e-05	0.00538614	Carboxylic acids and derivatives	Amino acids, peptides, and analogues
HGF	4'',5,6-Trimethylscutellarein 7-glucoside	0.588089	0.145047	4.05446	6.43014e-05	0.00545972	Anthracenes	Anthraquinones
LAP.TGF-beta-1	Neferine	-0.583717	0.144046	-4.0523	6.48669e-05	0.00548589	Isoquinolines and derivatives	Benzylisoquinolines
CXCL6	Heptadecanoic acid	1.30603	0.32265	4.04783	6.60531e-05	0.00556413	Fatty Acyls	Fatty acids and conjugates
CXCL11	1-(11Z-eicosenoyl)-glycero-3-phosphate	-1.61826	0.400028	-4.04538	6.6711e-05	0.00559742	Glycerophospholipids	Glycerophosphates
MCP-1	Cuminaldehyde	0.970065	0.239929	4.04313	6.73181e-05	0.00562621	Prenol lipids	Monoterpenoids
TNFSF14	1-(8Z,11Z,14Z-eicosatrienoyl)-glycero-3-phosphate	-0.623961	0.154694	-4.03353	6.99797e-05	0.00582581	Glycerophospholipids	Glycerophospholipids
CXCL6	Apigenin	-1.38483	0.343507	-4.03145	7.05702e-05	0.00585211	Flavonoids	Flavones
LIF-R	Kanzonol F	-0.25847	0.0642582	-4.02236	7.32037e-05	0.00604696	Isoflavonoids	Furanoisoflavonoids
CXCL5	3-hydroxynonanoyl carnitine	1.13178	0.281484	4.02078	7.36711e-05	0.00606208	Fatty Acyls	Fatty acid esters
CSF-1	N-(1-Deoxy-1-fructosyl)valine	0.302987	0.0754508	4.01569	7.51931e-05	0.00616352	Carboxylic acids and derivatives	Amino acids, peptides, and analogues
4E-BP1	(-)-Dioxibrassinin	-1.54304	0.384777	-4.01022	7.68639e-05	0.00627333	Carboxylic acids and derivatives	Amino acids, peptides, and analogues
VEGFA	1-Propenyl 1-(1-propenylthio)propyl disulfide	-0.458499	0.114356	-4.00939	7.71215e-05	0.00627333	Thioethers	Thioenol ethers
MCP-2	LysoPE(0:0/20:0)	-0.703752	0.175643	-4.00671	7.79541e-05	0.00629347	Glycerophospholipids	Glycerophosphoethanolamines
MCP-2	LysoPE(0:0/20:1(11Z))	-0.656372	0.163819	-4.0067	7.79596e-05	0.00629347	Glycerophospholipids	Glycerophosphoethanolamines
MCP-2	1-(11Z-eicosenoyl)-glycero-3-phosphate	-0.934363	0.233386	-4.00351	7.89615e-05	0.00635029	Glycerophospholipids	Glycerophosphates
LAP.TGF-beta-1	LysoPE(0:0/20:0)	-0.507069	0.126787	-3.99938	8.02799e-05	0.00643205	Glycerophospholipids	Glycerophosphoethanolamines
CCL4	Oxobutanoic acid	-2.6768	0.670373	-3.993	8.23583e-05	0.00657386	Keto acids and derivatives	Short-chain keto acids and derivatives
CXCL5	Brassinin	-1.65108	0.413848	-3.98959	8.34898e-05	0.00663931	Indoles and derivatives	Indoles
MCP-2	FAHFA(18:0/9-O-18:0)	0.380993	0.0955675	3.98664	8.44819e-05	0.00669323	Fatty Acyls	Fatty acids and conjugates
MCP-4	Calystegin B2	-2.02044	0.507331	-3.98248	8.58953e-05	0.00678	Tropane alkaloids	NOT AVAILABLE
MCP-1	1-(5Z,8Z,11Z,14Z-eicosatetraenoyl)-sn-glycero-3-phosphate	-0.692562	0.174061	-3.97884	8.71541e-05	0.00685398	Glycerophospholipids	Glycerophosphates
CXCL1	Brassinin	-1.27407	0.320553	-3.9746	8.86392e-05	0.00694515	Indoles and derivatives	Indoles
MCP-1	Licoagrodin	-0.999087	0.25148	-3.97284	8.92658e-05	0.00696862	Flavonoids	Flavans
CD8A	1-(11Z-eicosenoyl)-glycero-3-phosphate	-1.25507	0.316128	-3.97013	9.02353e-05	0.00701859	Glycerophospholipids	Glycerophosphates
CCL28	Hv-NCC-1	-0.713804	0.179919	-3.96736	9.12352e-05	0.00704494	Tetrapyrroles and derivatives	NOT AVAILABLE
CX3CL1	Myricanol 5-glucoside	-0.543103	0.136892	-3.96739	9.12248e-05	0.00704494	Lactones	Gamma butyrolactones
CX3CL1	Aminobutanoic acid (ABA)/3-Aminobutanoic acid	-1.5608	0.394548	-3.95591	9.54833e-05	0.00734635	Carboxylic acids and derivatives	Amino acids, peptides, and analogues
CXCL6	Marcanine A	-2.80908	0.710413	-3.95415	9.61549e-05	0.00737141	Quinolines and derivatives	Benzoquinolines
CXCL6	Divanillyltetrahydrofuran ferulate	-1.94068	0.491137	-3.95141	9.72053e-05	0.00742523	Furanoid lignans	Tetrahydrofuran lignans
CXCL5	Myricanol 5-glucoside	-2.67192	0.67639	-3.95027	9.76486e-05	0.00742645	Lactones	Gamma butyrolactones
MMP-1	Cyanidin 3-(6-caffeoylglucoside) 5-glucoside	-1.72472	0.436785	-3.94868	9.82666e-05	0.00742645	Flavonoids	Flavonoid glycosides
MCP-4	trans-Ferulic acid	-1.14669	0.290347	-3.94936	9.80011e-05	0.00742645	Organooxygen compounds	Carbohydrates and carbohydrate conjugates
MCP-1	KB 2	0.516276	0.1308	3.94707	9.88949e-05	0.00744752	Flavonoids	Flavones
VEGFA	Threonine	-0.335127	0.0849673	-3.94419	0.000100032	0.00750661	Carboxylic acids and derivatives	Amino acids, peptides, and analogues
CSF-1	Licoagrodin	-0.408672	0.103804	-3.93697	0.000102932	0.00769718	Flavonoids	Flavans
MCP-4	Pectenotoxin 2	-1.46293	0.372138	-3.93115	0.000105328	0.00780324	Macrolides and analogues	Pectenotoxins and derivatives
MCP-4	1-(8Z,11Z,14Z-eicosatrienoyl)-glycero-3-phosphate	-1.04002	0.264488	-3.9322	0.000104893	0.00780324	Glycerophospholipids	Glycerophospholipids
VEGFA	Peonidin-3-galactoside	-0.381167	0.0969927	-3.92985	0.000105869	0.00780324	Flavonoids	Flavonoid glycosides
LIF-R	Garcimangosone C	-0.302638	0.0770017	-3.93028	0.000105689	0.00780324	Benzopyrans	1-benzopyrans
FGF-19	Decarbamoylneosaxitoxin	1.78675	0.454748	3.92911	0.000106181	0.00780324	Saxitoxins, gonyautoxins, and derivatives	NOT AVAILABLE
MCP-1	Ximenoylacetone	0.435402	0.110943	3.92454	0.000108115	0.00791803	Organooxygen compounds	Carbonyl compounds
LIF-R	(S)-[8]-Gingerol	-0.102456	0.0262094	-3.90913	0.000114884	0.00838496	Phenols	Methoxyphenols
CXCL1	Apigenin	-1.71071	0.437925	-3.9064	0.000116125	0.00844663	Flavonoids	Flavones
MCP-4	Tamarixetin	-1.27878	0.327707	-3.9022	0.000118057	0.00855795	Flavonoids	O-methylated flavonoids
VEGFA	Cyanidin 3-(6-caffeoylglucoside) 5-glucoside	-0.476273	0.122151	-3.89907	0.000119519	0.00857684	Flavonoids	Flavonoid glycosides
MCP-1	Histidine	0.431124	0.110596	3.8982	0.000119928	0.00857684	Carboxylic acids and derivatives	Amino acids, peptides, and analogues
MMP-1	Ximenoylacetone	0.909387	0.233258	3.89863	0.000119725	0.00857684	Organooxygen compounds	Carbonyl compounds
CXCL5	Feruloylcholine	1.27269	0.326294	3.90046	0.000118868	0.00857684	Cinnamic acids and derivatives	Hydroxycinnamic acids and derivatives
FGF-21	[4]-Gingerdiol 3,5-diacetate	2.27065	0.582843	3.89581	0.000121058	0.00862871	Phenols	Methoxyphenols
MCP-2	Cyanidin 3-(6-caffeoylglucoside) 5-glucoside	-0.936415	0.240692	-3.89051	0.0001236	0.00875136	Flavonoids	Flavonoid glycosides
CD40	Aminobutanoic acid (ABA)/3-Aminobutanoic acid	1.35958	0.349384	3.89136	0.000123189	0.00875136	Carboxylic acids and derivatives	Amino acids, peptides, and analogues
DNER	Naringenin	0.194687	0.0500551	3.88944	0.000124116	0.0087588	Flavonoids	Flavans
MCP-2	Licoagrodin	-1.13252	0.29137	-3.88689	0.000125362	0.00879828	Flavonoids	Flavans
CXCL6	Sorgoleone 358	1.35953	0.349798	3.88661	0.000125501	0.00879828	Organooxygen compounds	Carbonyl compounds
VEGFA	(-)-Dioxibrassinin	-0.588933	0.151642	-3.8837	0.000126939	0.00886994	Carboxylic acids and derivatives	Amino acids, peptides, and analogues
FGF-21	LysoPE(0:0/20:1(11Z))	1.52415	0.392764	3.88056	0.000128508	0.0089502	Glycerophospholipids	Glycerophosphoethanolamines
CXCL6	Eriojaposide B	-2.02777	0.523383	-3.87435	0.000131669	0.00913939	Fatty Acyls	Fatty acyl glycosides
SCF	Benzyl alcohol	0.129489	0.033429	3.87354	0.000132082	0.00913939	Benzene and substituted derivatives	Benzyl alcohols
CSF-1	2-Amino-1,6-dimethylfuro[3,2-e]imidazo[4,5-b]pyridine	0.166492	0.0430212	3.87	0.000133921	0.00923663	Imidazopyridines	NOT AVAILABLE
LIF-R	FAHFA(18:0/9-O-18:0)	-0.144698	0.0374074	-3.86815	0.000134893	0.00927299	Fatty Acyls	Fatty acids and conjugates
MMP-1	Feruloylcholine	0.734241	0.189897	3.86652	0.000135753	0.00927299	Cinnamic acids and derivatives	Hydroxycinnamic acids and derivatives
FGF-23	Phthalate	3.12391	0.80792	3.8666	0.00013571	0.00927299	Benzene and substituted derivatives	Benzoic acids and derivatives
CXCL1	(-)-Dioxibrassinin	-2.79199	0.722465	-3.86454	0.000136808	0.00931519	Carboxylic acids and derivatives	Amino acids, peptides, and analogues
SCF	C24:6	-0.304792	0.0789111	-3.86248	0.000137911	0.00936035	Fatty Acyls	Fatty acyl thioesters
MMP-1	KB 2	1.06109	0.275234	3.85522	0.000141863	0.00959806	Flavonoids	Flavones
CXCL11	Lyciumin A	-1.1794	0.306025	-3.85394	0.000142573	0.00961556	2-arylbenzofuran flavonoids	NOT AVAILABLE
CXCL6	Histidine	0.936529	0.24326	3.84991	0.000144823	0.00973652	Carboxylic acids and derivatives	Amino acids, peptides, and analogues
CXCL6	1-O-Galloylglycerol	-1.68256	0.437156	-3.84887	0.000145411	0.00973777	Benzene and substituted derivatives	Benzoic acids and derivatives
MCP-1	Mangostenone B	0.885209	0.230028	3.84826	0.000145756	0.00973777	Benzopyrans	1-benzopyrans
MCP-2	Apigenin	-0.697287	0.181281	-3.84645	0.000146783	0.0097453	Flavonoids	Flavones
MCP-4	3,​4-​Dimethyl-​5-​pentyl-2-​furantridecanoic acid	1.03189	0.268265	3.84654	0.000146732	0.0097453	Fatty Acyls	Fatty acids and conjugates
ADA	Resveratrol 4''-(6-galloylglucoside)	0.489742	0.127487	3.8415	0.000149632	0.0099036	Prenol lipids	Sesterterpenoids
CXCL11	Apigenin	-1.1936	0.310915	-3.83899	0.000151098	0.00995219	Flavonoids	Flavones
CST5	Methyl 3,4-dihydroxy-5-prenylbenzoate 3-glucoside	-0.453925	0.118251	-3.83864	0.0001513	0.00995219	Prenol lipids	Terpene glycosides
MCP-4	Eriojaposide B	-1.4636	0.382674	-3.82466	0.000159719	0.0104736	Fatty Acyls	Fatty acyl glycosides
LIF-R	Rutin	-0.433693	0.113487	-3.82151	0.000161675	0.0105694	Flavonoids	Flavonoid glycosides
MCP-1	Octadecyl fumarate	0.376651	0.0986249	3.81902	0.000163233	0.0106386	Fatty Acyls	Fatty acid esters
DNER	5''''-(4-Hydroxy-(E)-cinnamoyl) alpha-L-arabinofuranosyl-(1->3)-beta-D-xylopyranosyl-(1->4)-D-xylopyranoside	-0.156568	0.0410497	-3.8141	0.000166362	0.0108095	Organooxygen compounds	Carbohydrates and carbohydrate conjugates
CXCL1	Marcanine A	-3.45127	0.90587	-3.80989	0.000169086	0.0108215	Quinolines and derivatives	Benzoquinolines
MCP-4	Erinapyrone C	-3.43842	0.902187	-3.8112	0.000168233	0.0108215	Pyrans	Pyranones and derivatives
TNFSF14	Divanillyltetrahydrofuran ferulate	-0.802763	0.210534	-3.81298	0.000167083	0.0108215	Furanoid lignans	Tetrahydrofuran lignans
SCF	Neferine	0.41275	0.108306	3.81096	0.000168392	0.0108215	Isoquinolines and derivatives	Benzylisoquinolines
FGF-21	5-Hydroxypentanoic acid	0.845836	0.22197	3.81058	0.000168637	0.0108215	Fatty Acyls	Fatty acids and conjugates
CXCL6	4'',5,6-Trimethylscutellarein 7-glucoside	1.93894	0.509497	3.80559	0.000171911	0.0109693	Anthracenes	Anthraquinones
MCP-4	N-(1-Deoxy-1-fructosyl)leucine	-1.48157	0.389406	-3.80468	0.000172515	0.0109751	Carboxylic acids and derivatives	Amino acids, peptides, and analogues
SCF	Diacetoxyscirpenol	-0.610285	0.160912	-3.79265	0.000180681	0.0114603	Prenol lipids	Sesquiterpenoids
MCP-2	Kanzonol F	0.624877	0.164891	3.78963	0.000182794	0.0115599	Isoflavonoids	Furanoisoflavonoids
DNER	LysoPE(0:0/20:2(11Z,14Z))	0.193032	0.0509592	3.78796	0.000183964	0.0115995	Glycerophospholipids	Glycerophosphoethanolamines
CCL28	(-)-Epigallocatechin 3,5-di-gallate	-0.647803	0.171086	-3.78641	0.000185065	0.0116345	Flavonoids	Flavans
DNER	Heptadecanoic acid	-0.236667	0.0625706	-3.7824	0.00018793	0.0117799	Fatty Acyls	Fatty acids and conjugates
CCL4	Brassinin	-0.495208	0.130989	-3.78052	0.000189289	0.0118303	Indoles and derivatives	Indoles
CXCL5	Kanzonol F	1.94562	0.514814	3.77928	0.000190192	0.011852	Isoflavonoids	Furanoisoflavonoids
LAP.TGF-beta-1	1-(11Z-eicosenoyl)-glycero-3-phosphate	-0.637469	0.168937	-3.77341	0.000194514	0.012086	Glycerophospholipids	Glycerophosphates
MCP-1	1-(11Z-eicosenoyl)-glycero-3-phosphate	-0.762926	0.202235	-3.77247	0.000195214	0.0120942	Glycerophospholipids	Glycerophosphates
CXCL5	Somniferine	-1.56784	0.415895	-3.7698	0.000197211	0.0121825	Morphinans	NOT AVAILABLE
MCP-2	N-(1-Deoxy-1-fructosyl)phenylalanine	-0.628874	0.166908	-3.7678	0.000198727	0.0122407	Carboxylic acids and derivatives	Amino acids, peptides, and analogues
EN-RAGE	Somniferine	-0.514423	0.136609	-3.76567	0.00020035	0.0122743	Morphinans	NOT AVAILABLE
LIF-R	1-Phenyl-1,3-heptadecanedione	-0.2451	0.0650897	-3.76557	0.000200424	0.0122743	Organooxygen compounds	Carbonyl compounds
TNFSF14	7-Acetoxy-6-methoxycoumarin	-0.375501	0.0997663	-3.76381	0.000201781	0.012322	Coumarins and derivatives	NOT AVAILABLE
CSF-1	1-(11Z-eicosenoyl)-glycero-3-phosphate	-0.313879	0.0834504	-3.76126	0.000203752	0.0124067	Glycerophospholipids	Glycerophosphates
CCL4	Cyanidin 3-(6-caffeoylglucoside) 5-glucoside	-0.892615	0.237594	-3.75689	0.000207171	0.012579	Flavonoids	Flavonoid glycosides
IL-18R1	Protogonyautoxin I	-0.682072	0.182169	-3.74417	0.000217451	0.0131553	Saxitoxins, gonyautoxins, and derivatives	NOT AVAILABLE
TRAIL	Tragopogonsaponin M	-0.329758	0.088085	-3.74363	0.000217897	0.0131553	Isoflavonoids	O-methylated isoflavonoids
SIRT2	Eremopetasinorol	-2.5733	0.68802	-3.74016	0.000220792	0.0132924	Organooxygen compounds	Alcohols and polyols
CXCL10	Lyciumin A	-0.801721	0.214514	-3.73738	0.000223136	0.0133957	2-arylbenzofuran flavonoids	NOT AVAILABLE
MMP-1	6-Methylquinoline	-1.40618	0.377038	-3.72955	0.000229856	0.0137403	Quinolines and derivatives	NOT AVAILABLE
CXCL5	3-Methylcyclopentadecanone	1.6831	0.451331	3.7292	0.000230166	0.0137403	Organooxygen compounds	Carbonyl compounds
CXCL11	Methylpicraquassioside A	0.929011	0.249236	3.72744	0.000231702	0.0137934	Organooxygen compounds	Carbohydrates and carbohydrate conjugates
MCP-1	Hydrocortamate	0.734484	0.197503	3.71885	0.000239354	0.0142092	Steroids and steroid derivatives	Pregnane steroids
IL6	Protogonyautoxin I	-1.54352	0.415152	-3.71797	0.000240156	0.0142173	Saxitoxins, gonyautoxins, and derivatives	NOT AVAILABLE
MCP-2	Erucic acid	0.556098	0.149679	3.71527	0.000242615	0.014323	Fatty Acyls	Fatty acids and conjugates
CXCL6	2-O-(Z-p-Hydroxycinnamoyl)-(x)-glyceric acid	-2.22299	0.598666	-3.71323	0.000244491	0.0143542	Cinnamic acids and derivatives	Hydroxycinnamic acids and derivatives
CX3CL1	LysoPE(0:0/22:4(7Z,10Z,13Z,16Z))	-0.375415	0.101095	-3.71349	0.000244254	0.0143542	Glycerophospholipids	Glycerophosphoethanolamines
MCP-4	LysoPE(0:0/22:4(7Z,10Z,13Z,16Z))	-0.824214	0.222027	-3.71223	0.000245415	0.0143689	Glycerophospholipids	Glycerophosphoethanolamines
4E-BP1	Divanillyltetrahydrofuran ferulate	-1.24115	0.334549	-3.70993	0.00024756	0.0144548	Furanoid lignans	Tetrahydrofuran lignans
CCL4	Theogallin	-1.33877	0.361156	-3.70689	0.000250415	0.0145418	Organooxygen compounds	Alcohols and polyols
DNER	4'',5,6-Trimethylscutellarein 7-glucoside	-0.365527	0.0985933	-3.70742	0.00024991	0.0145418	Anthracenes	Anthraquinones
MMP-1	(2S,4S)-Monatin	-1.05331	0.284775	-3.69877	0.000258196	0.0148605	Carboxylic acids and derivatives	Amino acids, peptides, and analogues
DNER	1-(8Z,11Z,14Z-eicosatrienoyl)-glycero-3-phosphate	0.259532	0.0701614	3.69908	0.000257896	0.0148605	Glycerophospholipids	Glycerophospholipids
CXCL5	Phenylethyl primeveroside	2.40129	0.649303	3.69826	0.000258691	0.0148605	Organooxygen compounds	Carbohydrates and carbohydrate conjugates
FGF-23	3-Furanmethanol glucoside	2.43129	0.657309	3.69886	0.000258106	0.0148605	Organooxygen compounds	Carbohydrates and carbohydrate conjugates
LIF-R	2-Phenylethyl beta-D-glucopyranoside	-0.535281	0.144836	-3.69578	0.000261114	0.0149593	Organooxygen compounds	Carbohydrates and carbohydrate conjugates
CCL4	Apigenin	-0.660403	0.178994	-3.68953	0.000267326	0.0152741	Flavonoids	Flavones
SCF	8-Propanoylneosolaniol	-0.395684	0.107269	-3.6887	0.000268154	0.0152805	Isoquinolines and derivatives	Benzylisoquinolines
CCL28	Linoleamide	0.495229	0.134284	3.68791	0.000268955	0.0152852	Fatty Acyls	Fatty amides
TNFSF14	Aminobutanoic acid (ABA)/3-Aminobutanoic acid	1.87505	0.509164	3.68261	0.000274354	0.0155506	Carboxylic acids and derivatives	Amino acids, peptides, and analogues
CDCP1	7-Methoxy-2-methylisoflavone	0.672273	0.182695	3.67975	0.000277316	0.0156768	Isoflavonoids	O-methylated isoflavonoids
CST5	1,6-Dihydroxy-3,7-dimethoxy-2-(3-methyl-2-butenyl)-8-(3-hydroxy-3-methyl-1E-butenyl)-xanthone	-0.477078	0.12969	-3.67861	0.000278505	0.0157023	Benzopyrans	1-benzopyrans
MMP-1	Peonidin-3-galactoside	-1.28023	0.348116	-3.67758	0.000279578	0.0157213	Flavonoids	Flavonoid glycosides
SIRT2	C24:6	1.0579	0.288041	3.67273	0.000284699	0.0159671	Fatty Acyls	Fatty acyl thioesters
MCP-4	Neferine	-1.02151	0.27829	-3.67065	0.000286924	0.0160497	Isoquinolines and derivatives	Benzylisoquinolines
MCP-1	3-Hydroxymugineic acid	0.102458	0.0279409	3.66694	0.000290939	0.0162317	Carboxylic acids and derivatives	Amino acids, peptides, and analogues
CCL4	1-Phenyl-1,3-heptadecanedione	0.602164	0.164323	3.66452	0.000293582	0.0163363	Organooxygen compounds	Carbonyl compounds
CXCL5	Alpha-Linolenic acid	1.03769	0.283273	3.6632	0.000295029	0.0163741	Fatty Acyls	Lineolic acids and derivatives
CXCL6	Dide-O-methylsimmondsin	-1.9565	0.534766	-3.65862	0.000300122	0.0164914	Organooxygen compounds	Carbohydrates and carbohydrate conjugates
CXCL10	Marcanine A	-1.64901	0.450621	-3.65941	0.000299235	0.0164914	Quinolines and derivatives	Benzoquinolines
MCP-1	N-(1-Deoxy-1-fructosyl)leucine	-0.888417	0.24286	-3.65814	0.000300651	0.0164914	Carboxylic acids and derivatives	Amino acids, peptides, and analogues
MMP-1	Artonin D	1.481	0.404886	3.65782	0.000301011	0.0164914	Linear 1,3-diarylpropanoids	Chalcones and dihydrochalcones
CXCL5	Murrayanol	2.3057	0.629881	3.66053	0.000297985	0.0164914	Indoles and derivatives	Carbazoles
MCP-4	7-Methoxy-6-methyl-2H-1-benzopyran-2-one	-1.26607	0.346386	-3.6551	0.000304085	0.0165054	Coumarins and derivatives	NOT AVAILABLE
MCP-2	Distichonic acid A	-0.639639	0.174956	-3.656	0.000303063	0.0165054	Carboxylic acids and derivatives	Amino acids, peptides, and analogues
VEGFA	Dicyclohexyl disulfide	0.254249	0.0695778	3.65417	0.000305138	0.0165054	Organic disulfides	Dialkyldisulfides
MCP-1	Murrayanol	0.637188	0.174349	3.65466	0.000304581	0.0165054	Indoles and derivatives	Carbazoles
MMP-1	5''''-(4-Hydroxy-(E)-cinnamoyl) alpha-L-arabinofuranosyl-(1->3)-beta-D-xylopyranosyl-(1->4)-D-xylopyranoside	0.743743	0.203457	3.65552	0.000303609	0.0165054	Organooxygen compounds	Carbohydrates and carbohydrate conjugates
MCP-4	Divanillyltetrahydrofuran ferulate	-1.31568	0.360191	-3.65274	0.000306775	0.0165101	Furanoid lignans	Tetrahydrofuran lignans
MCP-4	Ximenoylacetone	0.653171	0.178794	3.65321	0.000306235	0.0165101	Organooxygen compounds	Carbonyl compounds
FGF-21	LysoPE(0:0/18:3(6Z,9Z,12Z))	1.39753	0.382695	3.65182	0.000307825	0.0165248	Glycerophospholipids	Glycerophosphoethanolamines
CXCL11	Thymol	-2.29296	0.628514	-3.64822	0.000311984	0.016706	Prenol lipids	Monoterpenoids
TRANCE	Decarbamoylneosaxitoxin	-1.21625	0.333926	-3.64227	0.000318963	0.0170369	Saxitoxins, gonyautoxins, and derivatives	NOT AVAILABLE
SCF	Acesulfame	0.887453	0.243867	3.63908	0.000322765	0.0171969	Organic sulfuric acids and derivatives	NOT AVAILABLE
MCP-4	Artonin D	1.12593	0.309494	3.63797	0.000324106	0.0172253	Linear 1,3-diarylpropanoids	Chalcones and dihydrochalcones
MCP-1	Eriojaposide B	-0.866558	0.238803	-3.62876	0.000335364	0.0177584	Fatty Acyls	Fatty acyl glycosides
CXCL10	LysoPE(0:0/20:1(11Z))	-0.716852	0.197566	-3.62841	0.000335804	0.0177584	Glycerophospholipids	Glycerophosphoethanolamines
IL6	LysoPE(0:0/18:2(9Z,12Z))	-0.577525	0.159268	-3.62613	0.000338658	0.0178383	Glycerophospholipids	Glycerophosphoethanolamines
SCF	Ethyl beta-D-glucopyranoside	-0.149414	0.0412087	-3.62578	0.000339097	0.0178383	Organooxygen compounds	Carbohydrates and carbohydrate conjugates
LAP.TGF-beta-1	Feruloylcholine	0.274407	0.0756944	3.6252	0.000339825	0.0178383	Cinnamic acids and derivatives	Hydroxycinnamic acids and derivatives
CXCL6	C24:6	1.00646	0.27782	3.62269	0.000342998	0.0179606	Fatty Acyls	Fatty acyl thioesters
MCP-4	Hesperetin	-1.36565	0.377273	-3.6198	0.000346682	0.0180647	Flavonoids	O-methylated flavonoids
CCL4	Torvanol A	0.310374	0.0857343	3.62018	0.000346189	0.0180647	Isoflavonoids	O-methylated isoflavonoids
CXCL11	2-Methoxynaphthalene	-1.20402	0.332817	-3.61767	0.000349425	0.0181633	Naphthalenes	NOT AVAILABLE
CCL4	Lyciumin A	-0.637466	0.176367	-3.61442	0.000353644	0.0183379	2-arylbenzofuran flavonoids	NOT AVAILABLE
CXCL6	1-(2-Thienyl)-1,2-propanedione	-5.47495	1.5156	-3.6124	0.000356296	0.0184305	Organooxygen compounds	Carbonyl compounds
CXCL6	Hydrocortamate	1.5693	0.434715	3.60996	0.00035952	0.0185523	Steroids and steroid derivatives	Pregnane steroids
MCP-2	1-(5Z,8Z,11Z,14Z-eicosatetraenoyl)-sn-glycero-3-phosphate	-0.730269	0.202366	-3.60865	0.000361266	0.0185974	Glycerophospholipids	Glycerophosphates
IL6	1-(8Z,11Z,14Z-eicosatrienoyl)-glycero-3-phosphate	-1.01443	0.281206	-3.60742	0.000362903	0.0186366	Glycerophospholipids	Glycerophospholipids
FGF-21	LysoPE(0:0/18:1(11Z))	0.96456	0.267458	3.60639	0.000364283	0.0186625	Glycerophospholipids	Glycerophosphoethanolamines
CXCL11	(-)-Dioxibrassinin	-1.85193	0.514123	-3.60212	0.000370066	0.0189133	Carboxylic acids and derivatives	Amino acids, peptides, and analogues
CD8A	LysoPE(0:0/20:0)	-0.860282	0.239001	-3.59949	0.000373673	0.0189159	Glycerophospholipids	Glycerophosphoethanolamines
Flt3L	Protogonyautoxin I	-0.674337	0.187371	-3.59894	0.000374431	0.0189159	Saxitoxins, gonyautoxins, and derivatives	NOT AVAILABLE
MCP-1	5-Hydroxypentanoic acid	-0.289076	0.0803245	-3.59885	0.000374556	0.0189159	Fatty Acyls	Fatty acids and conjugates
HGF	Feruloylcholine	0.204905	0.0569005	3.60112	0.000371438	0.0189159	Cinnamic acids and derivatives	Hydroxycinnamic acids and derivatives
TNF	Triose	1.18554	0.329328	3.59988	0.000373138	0.0189159	Organooxygen compounds	Carbohydrates and carbohydrate conjugates
CX3CL1	Ovalicin	0.554027	0.154071	3.59592	0.000378617	0.0190758	Organooxygen compounds	Alcohols and polyols
MMP-1	FAHFA(16:0/9-O-18:0)	0.53302	0.148348	3.59305	0.000382638	0.019233	Fatty Acyls	Fatty acids and conjugates
MMP-1	Brassinin	-0.86907	0.241921	-3.59237	0.000383592	0.0192355	Indoles and derivatives	Indoles
CASP-8	Madlongiside C	-0.593873	0.165583	-3.58656	0.000391865	0.0195584	Prenol lipids	Triterpenoids
TWEAK	Syndesine	-0.30718	0.085643	-3.58675	0.000391597	0.0195584	Carboxylic acids and derivatives	Amino acids, peptides, and analogues
OSM	1-Arachidonoylglycerophosphoinositol	0.848267	0.236688	3.5839	0.000395717	0.0197045	Glycerophospholipids	Glycerophosphates
CCL28	(Iso)Leucine	-0.65905	0.184034	-3.58114	0.00039974	0.0198311	Carboxylic acids and derivatives	Amino acids, peptides, and analogues
IL6	3-hydroxyundecanoyl carnitine	0.483161	0.134928	3.58088	0.000400121	0.0198311	Fatty Acyls	Fatty acid esters
SIRT2	L-1,2,3,4-Tetrahydro-beta-carboline-3-carboxylic acid	-1.283	0.358496	-3.57884	0.000403122	0.0198446	Indoles and derivatives	Pyridoindoles
MCP-4	Riboflavin	-0.668325	0.18668	-3.58005	0.000401336	0.0198446	Pteridines and derivatives	Alloxazines and isoalloxazines
MCP-1	Ovalicin	0.754053	0.2107	3.5788	0.000403187	0.0198446	Organooxygen compounds	Alcohols and polyols
CCL4	2-Methoxynaphthalene	-0.683253	0.19136	-3.5705	0.000415625	0.0203628	Naphthalenes	NOT AVAILABLE
CCL4	Riboflavin	-0.473399	0.132575	-3.5708	0.000415175	0.0203628	Pteridines and derivatives	Alloxazines and isoalloxazines
CXCL1	Thymol	-3.16321	0.886851	-3.56679	0.000421309	0.0204499	Prenol lipids	Monoterpenoids
SIRT2	Gallic acid	-1.66525	0.467033	-3.56559	0.000423161	0.0204499	Benzene and substituted derivatives	Benzoic acids and derivatives
VEGFA	1-[(2,5-Dimethylphenyl)azo]-2-naphthalenol	0.142347	0.039901	3.56749	0.00042023	0.0204499	Naphthalenes	Naphthols and derivatives
CCL25	LysoPE(0:0/18:1(11Z))	0.321831	0.0901816	3.5687	0.000418381	0.0204499	Glycerophospholipids	Glycerophosphoethanolamines
MCP-2	3-Methylcyclopentadecanone	0.516561	0.144855	3.56605	0.000422443	0.0204499	Organooxygen compounds	Carbonyl compounds
CXCL6	Murrayanol	1.36808	0.383656	3.56589	0.00042269	0.0204499	Indoles and derivatives	Carbazoles
IL6	1,6-Dihydroxy-3,7-dimethoxy-2-(3-methyl-2-butenyl)-8-(3-hydroxy-3-methyl-1E-butenyl)-xanthone	0.74434	0.208902	3.56311	0.00042702	0.0205897	Benzopyrans	1-benzopyrans
OPG	1-Oleoylglycerophosphoinositol	0.440315	0.123696	3.55965	0.000432439	0.0208039	Glycerophospholipids	Glycerophosphoinositols
CXCL6	1-(8Z,11Z,14Z-eicosatrienoyl)-glycero-3-phosphate	-1.29392	0.3636	-3.55862	0.000434064	0.0208351	Glycerophospholipids	Glycerophospholipids
CCL25	1-Oleoylglycerophosphoinositol	0.462479	0.129996	3.55764	0.000435634	0.0208634	Glycerophospholipids	Glycerophosphoinositols
SIRT2	(-)-Dioxibrassinin	-2.1021	0.591006	-3.55681	0.000436939	0.020879	Carboxylic acids and derivatives	Amino acids, peptides, and analogues
CXCL5	PA(20:1(11Z)/15:0)	-2.0507	0.576755	-3.55559	0.000438902	0.0209259	Glycerophospholipids	Glycerophosphates
CXCL1	Oxobutanoic acid	-5.8762	1.65329	-3.55425	0.000441042	0.020981	Keto acids and derivatives	Short-chain keto acids and derivatives
CXCL6	Hv-NCC-1	-1.88036	0.529231	-3.55301	0.00044304	0.0209824	Tetrapyrroles and derivatives	NOT AVAILABLE
CXCL6	Aminobutanoic acid (ABA)/3-Aminobutanoic acid/3-Aminobutanoic acid	4.23433	1.19164	3.55337	0.000442468	0.0209824	Carboxylic acids and derivatives	Amino acids, peptides, and analogues
IL6	Neferine	-1.04556	0.295157	-3.54239	0.000460514	0.0217134	Isoquinolines and derivatives	Benzylisoquinolines
TRAIL	N-Methylcalystegine B2	0.586501	0.165564	3.54244	0.000460423	0.0217134	Tropane alkaloids	NOT AVAILABLE
LIF-R	3-hydroxynonanoyl carnitine	-0.125512	0.0354482	-3.54072	0.000463309	0.021797	Fatty Acyls	Fatty acid esters
CXCL11	Alpha-Linolenic acid	0.551257	0.155846	3.53719	0.000469296	0.02203	Fatty Acyls	Lineolic acids and derivatives
MCP-2	Curcumin	-0.932343	0.263906	-3.53285	0.000476735	0.0222323	Diarylheptanoids	Linear diarylheptanoids
LAP.TGF-beta-1	(-)-Dioxibrassinin	-0.76507	0.216554	-3.53293	0.00047661	0.0222323	Carboxylic acids and derivatives	Amino acids, peptides, and analogues
CXCL11	Murrayanol	1.22449	0.34654	3.53347	0.000475665	0.0222323	Indoles and derivatives	Carbazoles
FGF-19	2-Phenylethyl beta-D-glucopyranoside	-1.89402	0.536397	-3.531	0.00047995	0.0223334	Organooxygen compounds	Carbohydrates and carbohydrate conjugates
CST5	Methyl 4,6-di-O-galloyl-beta-D-glucopyranoside	-0.484701	0.137371	-3.5284	0.000484493	0.0224467	Tannins	NOT AVAILABLE
MCP-2	D-erythro-L-galacto-Nonulose	-0.330034	0.093535	-3.52846	0.000484398	0.0224467	Organooxygen compounds	Carbohydrates and carbohydrate conjugates
DNER	3,​4-​Dimethyl-​5-​pentyl-2-​furantridecanoic acid	-0.25127	0.0712297	-3.5276	0.000485913	0.0224486	Fatty Acyls	Fatty acids and conjugates
MCP-2	Phenylethyl primeveroside	0.735101	0.20841	3.52718	0.000486639	0.0224486	Organooxygen compounds	Carbohydrates and carbohydrate conjugates
CSF-1	N1-trans-Feruloylagmatine	0.172988	0.049069	3.52541	0.000489777	0.0225273	Cinnamic acids and derivatives	Hydroxycinnamic acids and derivatives
CSF-1	Austrobailignan 7	0.190192	0.0539578	3.52483	0.000490804	0.0225273	Furanoid lignans	Tetrahydrofuran lignans
MCP-1	Heptadecanoic acid	0.520621	0.147718	3.52443	0.000491516	0.0225273	Fatty Acyls	Fatty acids and conjugates
STAMBP	Eremopetasinorol	-1.68072	0.477802	-3.51761	0.000503802	0.0230408	Organooxygen compounds	Alcohols and polyols
OSM	Divanillyltetrahydrofuran ferulate	-1.20793	0.343596	-3.51555	0.000507557	0.0231451	Furanoid lignans	Tetrahydrofuran lignans
Flt3L	(-)-Dioxibrassinin	-0.698763	0.198785	-3.51517	0.000508254	0.0231451	Carboxylic acids and derivatives	Amino acids, peptides, and analogues
MCP-1	Salvianolic acid L	-0.783358	0.223095	-3.51132	0.000515375	0.0234194	Naphthalenes	Phenylnaphthalenes
MCP-2	(±)-2-Butylthiazolidine	-0.705743	0.201032	-3.51061	0.000516709	0.02343	Azolidines	Thiazolidines
CXCL6	Peonidin-3-galactoside	-1.27961	0.364804	-3.50768	0.000522196	0.0236285	Flavonoids	Flavonoid glycosides
CXCL5	1,6-Dihydroxy-3,7-dimethoxy-2-(3-methyl-2-butenyl)-8-(3-hydroxy-3-methyl-1E-butenyl)-xanthone	1.55576	0.444005	3.50393	0.000529311	0.0238997	Benzopyrans	1-benzopyrans
LAP.TGF-beta-1	Lyciumin A	-0.45293	0.129338	-3.50192	0.000533151	0.0240222	2-arylbenzofuran flavonoids	NOT AVAILABLE
4E-BP1	1-Isothiocyanato-7-(methylsulfinyl)heptane	-1.27166	0.36347	-3.49867	0.000539421	0.0242535	Sulfoxides	NOT AVAILABLE
AXIN1	Dide-O-methylsimmondsin	-1.73471	0.496071	-3.49689	0.000542887	0.024325	Organooxygen compounds	Carbohydrates and carbohydrate conjugates
LAP.TGF-beta-1	Somniferine	-0.337318	0.0964678	-3.49668	0.000543295	0.024325	Morphinans	NOT AVAILABLE
DNER	14,16-Nonacosanedione	-0.236262	0.0676035	-3.49482	0.000546947	0.0244372	Organooxygen compounds	Carbonyl compounds
MCP-2	LysoPE(0:0/20:2(11Z,14Z))	-0.48637	0.139299	-3.49155	0.000553418	0.0246746	Glycerophospholipids	Glycerophosphoethanolamines
DNER	Methylpicraquassioside A	-0.186737	0.0534998	-3.49043	0.000555646	0.0247222	Organooxygen compounds	Carbohydrates and carbohydrate conjugates
MCP-1	Sorgoleone 358	0.557784	0.159884	3.48868	0.000559149	0.0248262	Organooxygen compounds	Carbonyl compounds
IL6	(2S,4R)-4-(9H-Pyrido[3,4-b]indol-1-yl)-1,2,4-butanetriol	0.811205	0.232697	3.4861	0.000564355	0.0250053	Harmala alkaloids	NOT AVAILABLE
CXCL11	Divanillyltetrahydrofuran ferulate	-1.55425	0.445945	-3.48528	0.000566017	0.0250189	Furanoid lignans	Tetrahydrofuran lignans
CSF-1	Calystegine C1	0.403175	0.115695	3.48479	0.00056701	0.0250189	Tropane alkaloids	NOT AVAILABLE
SIRT2	Divanillyltetrahydrofuran ferulate	-1.78462	0.512377	-3.48302	0.000570633	0.0251267	Furanoid lignans	Tetrahydrofuran lignans
MCP-1	5-Phenylvaleric acid	1.36917	0.393351	3.48078	0.000575235	0.0252771	Fatty Acyls	Fatty acids and conjugates
MCP-4	D-erythro-L-galacto-Nonulose	-0.4518	0.129886	-3.47843	0.000580104	0.025412	Organooxygen compounds	Carbohydrates and carbohydrate conjugates
MCP-2	Mangostenone B	0.930044	0.267396	3.47815	0.000580689	0.025412	Benzopyrans	1-benzopyrans
FGF-19	LysoPE(0:0/22:6(4Z,7Z,10Z,13Z,16Z,19Z))	-0.682942	0.196413	-3.47707	0.000582923	0.0254509	Glycerophospholipids	Glycerophosphoethanolamines
CCL23	Butyl 3-O-caffeoylquinate	-0.510813	0.146954	-3.47601	0.00058516	0.0254509	Organooxygen compounds	Alcohols and polyols
MCP-1	6-Prenylnaringenin	0.129097	0.0371353	3.47639	0.000584357	0.0254509	Flavonoids	Flavans
CXCL5	C24:6	1.58903	0.457408	3.47398	0.000589419	0.0255839	Fatty Acyls	Fatty acyl thioesters
MCP-4	Licoagrodin	-1.41012	0.406386	-3.4699	0.000598092	0.0259076	Flavonoids	Flavans
TNFSF14	Peonidin-3-galactoside	-0.541441	0.156182	-3.46673	0.000604895	0.0260962	Flavonoids	Flavonoid glycosides
SCF	Murrayanol	-0.379304	0.109412	-3.46675	0.000604851	0.0260962	Indoles and derivatives	Carbazoles
CCL4	4'',5,6-Trimethylscutellarein 7-glucoside	0.919972	0.26542	3.4661	0.00060627	0.0261027	Anthracenes	Anthraquinones
FGF-19	Egonol glucoside	-0.927996	0.2678	-3.46526	0.00060809	0.0261282	2-arylbenzofuran flavonoids	NOT AVAILABLE
LAP.TGF-beta-1	1-(8Z,11Z,14Z-eicosatrienoyl)-glycero-3-phosphate	-0.478949	0.138325	-3.46248	0.000614155	0.0262352	Glycerophospholipids	Glycerophospholipids
LIF-R	Alpha-Linolenic acid	-0.123082	0.0355479	-3.46243	0.000614273	0.0262352	Fatty Acyls	Lineolic acids and derivatives
MCP-4	Crosatoside B	0.854357	0.246707	3.46304	0.000612919	0.0262352	Organooxygen compounds	Carbohydrates and carbohydrate conjugates
CCL28	Eriojaposide B	-0.622022	0.179705	-3.46136	0.000616625	0.026283	Fatty Acyls	Fatty acyl glycosides
CX3CL1	Licoagrodin	-0.639505	0.185071	-3.45545	0.000629756	0.0267891	Flavonoids	Flavans
HGF	LysoPE(0:0/20:2(11Z,14Z))	-0.260993	0.075591	-3.4527	0.000635954	0.0269989	Glycerophospholipids	Glycerophosphoethanolamines
CXCL10	3-hydroxynonanoyl carnitine	0.37558	0.108992	3.44596	0.000651403	0.0275998	Fatty Acyls	Fatty acid esters
ST1A1	Dide-O-methylsimmondsin	-1.87439	0.544375	-3.4432	0.000657826	0.027812	Organooxygen compounds	Carbohydrates and carbohydrate conjugates
TNFSF14	3-Methylcyclopentadecanone	0.405859	0.1179	3.4424	0.000659681	0.027812	Organooxygen compounds	Carbonyl compounds
CXCL1	Sorgoleone 358	1.54065	0.447585	3.44213	0.000660325	0.027812	Organooxygen compounds	Carbonyl compounds
CCL4	Myricanol 5-glucoside	-0.738806	0.214836	-3.43893	0.000667878	0.0280746	Lactones	Gamma butyrolactones
VEGFA	Gallic acid	-0.41415	0.120479	-3.43752	0.000671221	0.0281343	Benzene and substituted derivatives	Benzoic acids and derivatives
FGF-21	9-(4-Hydroxyphenyl)-2-methoxy-1H-phenalen-1-one	1.23185	0.358386	3.43722	0.000671938	0.0281343	Naphthalenes	Phenylnaphthalenes
CXCL11	Licoagrodin	-1.72598	0.502358	-3.43575	0.000675448	0.0282258	Flavonoids	Flavans
MMP-1	gamma-Glutamyl-beta-(isoxazolin-5-on-2-yl)alanine	-1.21168	0.352983	-3.4327	0.000682803	0.0282566	Carboxylic acids and derivatives	Amino acids, peptides, and analogues
CXCL11	Neferine	-1.18386	0.34482	-3.43327	0.000681414	0.0282566	Isoquinolines and derivatives	Benzylisoquinolines
DNER	Albanin B	-0.230695	0.0671701	-3.43449	0.000678473	0.0282566	Flavonoids	Flavones
VEGFA	S-3-oxodecanoyl cysteamine	0.446718	0.130136	3.43269	0.000682815	0.0282566	Fatty Acyls	Fatty acyl thioesters
MMP-10	2-Methoxynaphthalene	0.705366	0.205467	3.43299	0.000682099	0.0282566	Naphthalenes	NOT AVAILABLE
STAMBP	Divanillyltetrahydrofuran ferulate	-1.2182	0.355106	-3.43052	0.000688106	0.0284204	Furanoid lignans	Tetrahydrofuran lignans
STAMBP	(-)-Dioxibrassinin	-1.40367	0.409976	-3.42379	0.000704687	0.0289211	Carboxylic acids and derivatives	Amino acids, peptides, and analogues
MCP-2	Myricanol 5-glucoside	-0.746272	0.218036	-3.4227	0.000707401	0.0289211	Lactones	Gamma butyrolactones
HGF	Marcanine A	-0.699099	0.204167	-3.42415	0.000703782	0.0289211	Quinolines and derivatives	Benzoquinolines
CCL28	Cyanidin 3-(6-caffeoylglucoside) 5-glucoside	-0.537526	0.157065	-3.42232	0.000708371	0.0289211	Flavonoids	Flavonoid glycosides
VEGFA	Hv-NCC-1	-0.484724	0.141634	-3.42238	0.00070822	0.0289211	Tetrapyrroles and derivatives	NOT AVAILABLE
FGF-21	LysoPE(0:0/22:5(4Z,7Z,10Z,13Z,16Z))	1.42828	0.417114	3.4242	0.000703667	0.0289211	Glycerophospholipids	Glycerophosphoethanolamines
CST5	Kanzonol F	-0.517279	0.151312	-3.41862	0.000717703	0.029246	Isoflavonoids	Furanoisoflavonoids
CX3CL1	1-(5Z,8Z,11Z,14Z-eicosatetraenoyl)-sn-glycero-3-phosphate	-0.437728	0.128164	-3.41537	0.000725971	0.0294703	Glycerophospholipids	Glycerophosphates
LAP.TGF-beta-1	C24:6	0.361486	0.105826	3.41586	0.000724719	0.0294703	Fatty Acyls	Fatty acyl thioesters
IL-10RB	Medicarpin 3-O-(6''-malonylglucoside)	-0.263051	0.0770747	-3.41293	0.000732254	0.029649	Isoflavonoids	Furanoisoflavonoids
CXCL5	1-Phenyl-1,3-heptadecanedione	1.78145	0.522025	3.41258	0.000733156	0.029649	Organooxygen compounds	Carbonyl compounds
MMP-1	(-)-Epigallocatechin 3,5-di-gallate	-1.6407	0.48086	-3.41202	0.000734626	0.0296522	Flavonoids	Flavans
VEGFA	1,2,4,5,7-Pentathiocane	-0.32897	0.0964368	-3.41125	0.000736621	0.0296765	Organic disulfides	NOT AVAILABLE
IL-18R1	1-Arachidonoylglycerophosphoinositol	0.394753	0.115749	3.41042	0.000738764	0.0297067	Glycerophospholipids	Glycerophosphates
SCF	(S,E)-Zearalenone	-0.159218	0.0466968	-3.40961	0.000740874	0.0297354	Macrolides and analogues	Zearalenones
CXCL11	Brassinin	-0.780366	0.228932	-3.40872	0.000743208	0.029773	Indoles and derivatives	Indoles
CCL4	Shoyuflavone C	-3.45392	1.01391	-3.40652	0.000749	0.0298927	Isoflavonoids	Isoflav-2-enes
CXCL6	LysoPE(0:0/20:1(11Z))	-1.06771	0.313386	-3.40703	0.000747657	0.0298927	Glycerophospholipids	Glycerophosphoethanolamines
TNFSF14	Cyanidin 3-(6-caffeoylglucoside) 5-glucoside	-0.669718	0.196754	-3.40383	0.000756132	0.0300647	Flavonoids	Flavonoid glycosides
DNER	LysoPE(0:0/20:1(11Z))	0.206203	0.0605735	3.40418	0.000755189	0.0300647	Glycerophospholipids	Glycerophosphoethanolamines
CSF-1	Camelinin	0.33769	0.0992482	3.40248	0.000759738	0.0301518	Sulfoxides	NOT AVAILABLE
VEGFA	N-(1-Deoxy-1-fructosyl)valine	0.368063	0.108217	3.40115	0.000763312	0.0302039	Carboxylic acids and derivatives	Amino acids, peptides, and analogues
CXCL1	Feruloylcholine	0.864326	0.254183	3.40041	0.000765301	0.0302039	Cinnamic acids and derivatives	Hydroxycinnamic acids and derivatives
MMP-1	3,​4-​Dimethyl-​5-​pentyl-2-​furantridecanoic acid	1.20005	0.352869	3.40083	0.000764149	0.0302039	Fatty Acyls	Fatty acids and conjugates
4E-BP1	1-Propenyl 1-(1-propenylthio)propyl disulfide	-0.994924	0.292764	-3.39839	0.000770755	0.0303629	Thioethers	Thioenol ethers
TNF	Methyl 4,6-di-O-galloyl-beta-D-glucopyranoside	0.627231	0.184623	3.39736	0.000773548	0.0304167	Tannins	NOT AVAILABLE
CXCL11	Theogallin	-2.14224	0.630722	-3.39648	0.00077593	0.0304542	Organooxygen compounds	Alcohols and polyols
CST5	(S)-[8]-Gingerol	-0.209201	0.0616449	-3.39364	0.000783725	0.0307036	Phenols	Methoxyphenols
DNER	LysoPE(0:0/18:2(9Z,12Z))	0.135317	0.0398865	3.39257	0.00078669	0.0307632	Glycerophospholipids	Glycerophosphoethanolamines
TNFB	Butyl 3-O-caffeoylquinate	-0.355531	0.104854	-3.39074	0.000791741	0.030904	Organooxygen compounds	Alcohols and polyols
CST5	Methylpicraquassioside A	-0.451271	0.133312	-3.38507	0.000807666	0.031468	Organooxygen compounds	Carbohydrates and carbohydrate conjugates
MMP-1	Protogonyautoxin I	-1.74216	0.514939	-3.38323	0.000812878	0.0315971	Saxitoxins, gonyautoxins, and derivatives	NOT AVAILABLE
VEGFA	Resveratrol 4''-(6-galloylglucoside)	0.27285	0.0806565	3.38286	0.000813946	0.0315971	Prenol lipids	Sesterterpenoids
CXCL5	Cyanidin 3-(6-caffeoylglucoside) 5-glucoside	-2.55499	0.755901	-3.38006	0.000821953	0.0316404	Flavonoids	Flavonoid glycosides
AXIN1	Eremopetasinorol	-2.08455	0.616625	-3.38058	0.000820458	0.0316404	Organooxygen compounds	Alcohols and polyols
MCP-1	Acesulfame	-1.31987	0.390603	-3.37906	0.00082485	0.0316404	Organic sulfuric acids and derivatives	NOT AVAILABLE
OSM	Peonidin-3-galactoside	-0.859052	0.254244	-3.37885	0.000825452	0.0316404	Flavonoids	Flavonoid glycosides
LAP.TGF-beta-1	Myricanol 5-glucoside	-0.532272	0.157446	-3.38067	0.000820215	0.0316404	Lactones	Gamma butyrolactones
SLAMF1	Cyanidin 3-(6-caffeoylglucoside) 5-glucoside	-0.395766	0.117111	-3.37942	0.000823811	0.0316404	Flavonoids	Flavonoid glycosides
CSF-1	Hv-NCC-1	-0.336385	0.099525	-3.3799	0.000822408	0.0316404	Tetrapyrroles and derivatives	NOT AVAILABLE
MCP-1	Indole-3-acetylglutamic acid	-0.8606	0.254768	-3.37798	0.000827965	0.0316797	Carboxylic acids and derivatives	Amino acids, peptides, and analogues
MCP-2	Riboflavin	-0.455237	0.13482	-3.37663	0.000831881	0.0317725	Pteridines and derivatives	Alloxazines and isoalloxazines
MCP-1	1-Phenyl-1,3-heptadecanedione	0.487484	0.144549	3.37245	0.000844152	0.0321835	Organooxygen compounds	Carbonyl compounds
MCP-4	Ethyl cinnamate	1.89176	0.561725	3.36777	0.000858065	0.0326555	Cinnamic acids and derivatives	Cinnamic acid esters
MCP-2	Divanillyltetrahydrofuran ferulate	-0.876352	0.260381	-3.36565	0.00086444	0.0328395	Furanoid lignans	Tetrahydrofuran lignans
IL6	Mangostenone B	1.32399	0.393505	3.3646	0.000867592	0.0329006	Benzopyrans	1-benzopyrans
CCL4	Sorgoleone 358	0.614089	0.182618	3.3627	0.00087337	0.0330609	Organooxygen compounds	Carbonyl compounds
MCP-1	LysoPE(0:0/20:1(11Z))	-0.479501	0.142634	-3.36174	0.000876289	0.0331125	Glycerophospholipids	Glycerophosphoethanolamines
CCL4	(2S,4S)-Monatin	-0.520964	0.155142	-3.35798	0.000887863	0.0334905	Carboxylic acids and derivatives	Amino acids, peptides, and analogues
CXCL5	4'',5,6-Trimethylscutellarein 7-glucoside	2.82476	0.84179	3.35566	0.000895059	0.0337023	Anthracenes	Anthraquinones
HGF	Neferine	-0.366179	0.109157	-3.35461	0.000898341	0.0337068	Isoquinolines and derivatives	Benzylisoquinolines
MMP-1	Hydrocortamate	1.3985	0.416849	3.35494	0.000897314	0.0337068	Steroids and steroid derivatives	Pregnane steroids
4E-BP1	L-1,2,3,4-Tetrahydro-beta-carboline-3-carboxylic acid	-0.789069	0.235289	-3.35361	0.000901476	0.0337649	Indoles and derivatives	Pyridoindoles
MMP-1	N-(1-Deoxy-1-fructosyl)leucine	-1.71647	0.512232	-3.35095	0.00090985	0.0340188	Carboxylic acids and derivatives	Amino acids, peptides, and analogues
ADA	Benzothiazole	-0.146785	0.0438285	-3.34908	0.000915797	0.0341812	Benzothiazoles	NOT AVAILABLE
CXCL11	Eriojaposide B	-1.59135	0.475496	-3.34672	0.000923345	0.0343749	Fatty Acyls	Fatty acyl glycosides
CXCL10	Neferine	-0.808487	0.241596	-3.34645	0.000924211	0.0343749	Isoquinolines and derivatives	Benzylisoquinolines
HGF	1-Propenyl 1-(1-propenylthio)propyl disulfide	-0.411833	0.123182	-3.34329	0.0009344	0.0346933	Thioethers	Thioenol ethers
CXCL11	Marcanine A	-2.15967	0.646089	-3.34268	0.00093637	0.0347059	Quinolines and derivatives	Benzoquinolines
MCP-4	2-Methoxystypandrone	-3.74397	1.12068	-3.34081	0.000942476	0.0348543	Naphthalenes	Naphthoquinones
TNFSF14	1-Phenyl-1,3-heptadecanedione	0.454374	0.136022	3.34045	0.000943643	0.0348543	Organooxygen compounds	Carbonyl compounds
CCL20	Hv-NCC-1	-1.34336	0.40264	-3.33638	0.000957063	0.0351066	Tetrapyrroles and derivatives	NOT AVAILABLE
MCP-4	L-1,2,3,4-Tetrahydro-beta-carboline-3-carboxylic acid	-0.844878	0.253197	-3.33683	0.000955559	0.0351066	Indoles and derivatives	Pyridoindoles
MCP-2	2'',4,4''-Trihydroxy-6''-methoxy-3'',5''-diprenylchalcone	0.904751	0.271076	3.33763	0.000952913	0.0351066	Linear 1,3-diarylpropanoids	Chalcones and dihydrochalcones
CXCL5	Egonol glucoside	1.93372	0.579496	3.33691	0.000955316	0.0351066	2-arylbenzofuran flavonoids	NOT AVAILABLE
DNER	KB 2	-0.186673	0.0559754	-3.33492	0.000961928	0.0352244	Flavonoids	Flavones
CCL4	Divanillyltetrahydrofuran ferulate	-0.85554	0.256699	-3.33285	0.000968822	0.0353554	Furanoid lignans	Tetrahydrofuran lignans
MMP-1	Naringenin	-0.830674	0.249233	-3.33292	0.000968598	0.0353554	Flavonoids	Flavans
VEGFA	N-(1-Deoxy-1-fructosyl)phenylalanine	-0.283667	0.08514	-3.33178	0.000972448	0.035427	Carboxylic acids and derivatives	Amino acids, peptides, and analogues
CXCL10	Oxobutanoic acid	-2.74136	0.822982	-3.33101	0.000975038	0.0354608	Keto acids and derivatives	Short-chain keto acids and derivatives
TNFSF14	Marcanine A	-1.01944	0.306251	-3.32875	0.000982669	0.0356167	Quinolines and derivatives	Benzoquinolines
CXCL11	Heptadecanoic acid	0.978213	0.293831	3.32917	0.000981272	0.0356167	Fatty Acyls	Fatty acids and conjugates
MCP-2	Crosatoside B	0.592487	0.178027	3.32806	0.000985017	0.0356412	Organooxygen compounds	Carbohydrates and carbohydrate conjugates
EN-RAGE	1-(5Z,8Z,11Z,14Z-eicosatetraenoyl)-sn-glycero-3-phosphate	0.692387	0.208156	3.32629	0.000991077	0.0357997	Glycerophospholipids	Glycerophosphates
MCP-4	1,2,4,5,7-Pentathiocane	-0.877486	0.263947	-3.32447	0.000997326	0.0358432	Organic disulfides	NOT AVAILABLE
DNER	Histidine	-0.157305	0.0473049	-3.32533	0.00099436	0.0358432	Carboxylic acids and derivatives	Amino acids, peptides, and analogues
FGF-21	1-Arachidonoylglycerophosphoinositol	1.42915	0.429883	3.32451	0.000997194	0.0358432	Glycerophospholipids	Glycerophosphates
CXCL5	Apigenin	-1.8925	0.569354	-3.32394	0.000999171	0.0358491	Flavonoids	Flavones
IL18	Protogonyautoxin I	-0.966734	0.29121	-3.31971	0.00101387	0.0363154	Saxitoxins, gonyautoxins, and derivatives	NOT AVAILABLE
MMP-1	1-Isothiocyanato-7-(methylsulfinyl)heptane	-1.69792	0.512777	-3.31122	0.001044	0.0372643	Sulfoxides	NOT AVAILABLE
TNFRSF9	Marmesin	0.645438	0.194942	3.31092	0.00104505	0.0372643	Coumarins and derivatives	Furanocoumarins
MCP-4	5-Phenylvaleric acid	2.09574	0.633006	3.31077	0.00104561	0.0372643	Fatty Acyls	Fatty acids and conjugates
CXCL1	1-(2-Thienyl)-1,2-propanedione	-6.40146	1.93574	-3.30699	0.00105932	0.0376899	Organooxygen compounds	Carbonyl compounds
MCP-1	Shoyuflavone C	-2.94213	0.889914	-3.30609	0.0010626	0.0377436	Carboxylic acids and derivatives	Amino acids, peptides, and analogues
TNFSF14	Murrayanol	0.544009	0.164657	3.30388	0.00107069	0.0379677	Indoles and derivatives	Carbazoles
CXCL10	LysoPE(0:0/20:2(11Z,14Z))	-0.553152	0.167569	-3.30105	0.00108117	0.0382121	Glycerophospholipids	Glycerophosphoethanolamines
MMP-1	Octadecyl fumarate	0.688459	0.208532	3.30146	0.00107966	0.0382121	Fatty Acyls	Fatty acid esters
MCP-4	PA(20:1(11Z)/15:0)	-0.848478	0.257142	-3.29964	0.0010864	0.0383333	Glycerophospholipids	Glycerophosphates
CXCL10	LysoPE(0:0/20:0)	-0.701315	0.212614	-3.29854	0.00109054	0.0383808	Glycerophospholipids	Glycerophosphoethanolamines
IL6	Methylpicraquassioside A	0.707983	0.214649	3.29832	0.00109135	0.0383808	Organooxygen compounds	Carbohydrates and carbohydrate conjugates
MCP-1	Gallic acid	-0.677333	0.205413	-3.29742	0.00109473	0.0384364	Benzene and substituted derivatives	Benzoic acids and derivatives
MCP-2	Eriojaposide B	-0.913906	0.277423	-3.29427	0.00110665	0.0386637	Fatty Acyls	Fatty acyl glycosides
CSF-1	Aminobutanoic acid (ABA)/3-Aminobutanoic acid	-0.738992	0.224303	-3.29461	0.00110533	0.0386637	Carboxylic acids and derivatives	Amino acids, peptides, and analogues
NT-3	1-Propenyl 1-(1-propenylthio)propyl disulfide	-0.602955	0.183015	-3.29457	0.0011055	0.0386637	Thioethers	Thioenol ethers
CXCL5	LysoPE(0:0/20:1(11Z))	-1.69751	0.515731	-3.29146	0.00111735	0.0387834	Glycerophospholipids	Glycerophosphoethanolamines
PD-L1	Eriojaposide B	-0.54936	0.166886	-3.29184	0.00111591	0.0387834	Fatty Acyls	Fatty acyl glycosides
CX3CL1	1-(11Z-eicosenoyl)-glycero-3-phosphate	-0.489532	0.148728	-3.29147	0.00111733	0.0387834	Glycerophospholipids	Glycerophosphates
LAP.TGF-beta-1	Artonin D	0.531966	0.161586	3.29216	0.00111468	0.0387834	Linear 1,3-diarylpropanoids	Chalcones and dihydrochalcones
FGF-19	Heptadecanoic acid	-0.814369	0.247635	-3.28859	0.00112838	0.03906	Fatty Acyls	Fatty acids and conjugates
MCP-2	3-Hydroxymyristate	0.748027	0.227472	3.28844	0.00112899	0.03906	Fatty Acyls	Fatty acids and conjugates
CCL28	Indole-3-acetylglutamic acid	-0.628841	0.191548	-3.28295	0.0011504	0.0396722	Carboxylic acids and derivatives	Amino acids, peptides, and analogues
MMP-1	Ovalicin	1.45884	0.444313	3.28337	0.00114873	0.0396722	Organooxygen compounds	Alcohols and polyols
NT-3	L-1,2,3,4-Tetrahydro-beta-carboline-3-carboxylic acid	-0.48262	0.147033	-3.28239	0.00115258	0.0396831	Indoles and derivatives	Pyridoindoles
TNFSF14	4'',5,6-Trimethylscutellarein 7-glucoside	0.719516	0.219346	3.28027	0.00116098	0.0399077	Anthracenes	Anthraquinones
MCP-4	Cuminaldehyde	1.27494	0.388887	3.27843	0.00116831	0.040095	Prenol lipids	Monoterpenoids
LIF-R	3-Methylcyclopentadecanone	-0.186144	0.0567972	-3.27734	0.00117269	0.0401765	Organooxygen compounds	Carbonyl compounds
TNF	3-hydroxynonanoyl carnitine	0.36549	0.111535	3.2769	0.00117445	0.0401765	Fatty Acyls	Fatty acid esters
LAP.TGF-beta-1	Mangostenone B	0.633409	0.193432	3.27458	0.00118377	0.0404304	Benzopyrans	1-benzopyrans
MMP-1	Thymol	-2.18795	0.668369	-3.27357	0.00118788	0.0405056	Prenol lipids	Monoterpenoids
LAP.TGF-beta-1	Hv-NCC-1	-0.659959	0.201746	-3.27124	0.00119735	0.0407633	Tetrapyrroles and derivatives	NOT AVAILABLE
MCP-2	Decenoic (C10:1)	0.293034	0.0895969	3.27058	0.00120004	0.0407899
CXCL5	1-(5Z,8Z,11Z,14Z-eicosatetraenoyl)-sn-glycero-3-phosphate	-2.07286	0.634139	-3.26878	0.00120742	0.0409753	Glycerophospholipids	Glycerophosphates
LAP.TGF-beta-1	Apigenin	-0.430443	0.131719	-3.26789	0.00121112	0.0410355	Flavonoids	Flavones
CXCL10	[6]-Gingerdiol 3,5-diacetate	0.498018	0.15245	3.26676	0.00121576	0.0411276	Fatty Acyls	Fatty alcohol esters
CST5	N-(1-Deoxy-1-fructosyl)threonine	-0.558969	0.171169	-3.2656	0.00122059	0.0412254	Organooxygen compounds	Carbohydrates and carbohydrate conjugates
DNER	1,6-Dihydroxy-3,7-dimethoxy-2-(3-methyl-2-butenyl)-8-(3-hydroxy-3-methyl-1E-butenyl)-xanthone	-0.17093	0.0523506	-3.2651	0.00122266	0.0412299	Benzopyrans	1-benzopyrans
MCP-2	Protogonyautoxin I	-0.926111	0.283925	-3.26182	0.00123642	0.041628	Saxitoxins, gonyautoxins, and derivatives	NOT AVAILABLE
CXCL11	1-Propenyl 1-(1-propenylthio)propyl disulfide	-1.27121	0.389807	-3.26112	0.00123937	0.0416615	Thioethers	Thioenol ethers
4E-BP1	3,​4-​Dimethyl-​5-​pentyl-2-​furantridecanoic acid	0.818478	0.251024	3.26055	0.00124175	0.0416757	Fatty Acyls	Fatty acids and conjugates
CCL4	Heptadecanoic acid	0.550632	0.16898	3.25856	0.00125021	0.0418939	Fatty Acyls	Fatty acids and conjugates
CXCL5	(-)-Dioxibrassinin	-3.05892	0.939483	-3.25596	0.0012613	0.0419775	Carboxylic acids and derivatives	Amino acids, peptides, and analogues
CXCL5	2-Methoxynaphthalene	-1.98038	0.608286	-3.25567	0.00126256	0.0419775	Naphthalenes	NOT AVAILABLE
TNFSF14	PS(18:4(6Z,9Z,12Z,15Z)/18:4(6Z,9Z,12Z,15Z))	-0.998215	0.306524	-3.25656	0.00125871	0.0419775	Glycerophospholipids	Glycerophosphoserines
CSF-1	Lyciumin A	-0.208572	0.0640525	-3.25627	0.00125998	0.0419775	2-arylbenzofuran flavonoids	NOT AVAILABLE
MCP-1	3-Hydroxy-1-phenyl-1-heptadecanone	0.312152	0.0958615	3.25628	0.00125992	0.0419775	Fatty Acyls	Fatty alcohols
TNFSF14	Somniferine	-0.354494	0.108919	-3.25465	0.00126693	0.0420572	Morphinans	NOT AVAILABLE
CXCL1	Murrayanol	1.59267	0.490043	3.25007	0.00128678	0.0426498	Indoles and derivatives	Carbazoles
CASP-8	Eremopetasinorol	-1.17484	0.362046	-3.24501	0.00130907	0.0433214	Organooxygen compounds	Alcohols and polyols
MMP-1	1-(2-Thienyl)-1,2-propanedione	-4.72006	1.45509	-3.24382	0.00131433	0.0433475	Organooxygen compounds	Carbonyl compounds
MCP-1	Riboflavin	-0.378368	0.116656	-3.24346	0.00131596	0.0433475	Pteridines and derivatives	Alloxazines and isoalloxazines
CXCL5	3-hydroxyundecanoyl carnitine	0.933112	0.287657	3.24383	0.0013143	0.0433475	Fatty Acyls	Fatty acid esters
IL6	3-Methylcyclopentadecanone	0.692547	0.213669	3.24121	0.00132601	0.043611	Organooxygen compounds	Carbonyl compounds
CCL4	2-O-(Z-p-Hydroxycinnamoyl)-(x)-glyceric acid	-1.01155	0.312296	-3.23906	0.00133572	0.0438628	Cinnamic acids and derivatives	Hydroxycinnamic acids and derivatives
CXCL1	Myricanol 5-glucoside	-1.71025	0.528165	-3.23809	0.00134009	0.0439386	Lactones	Gamma butyrolactones
SLAMF1	(-)-cis-Rotenolone	-0.446842	0.138105	-3.23554	0.00135173	0.0441841	Isoflavonoids	Rotenoids
FGF-19	5-Hydroxypentanoic acid	0.436308	0.134848	3.23556	0.00135164	0.0441841	Fatty Acyls	Fatty acids and conjugates
CXCL5	3-Hydroxy-1-phenyl-1-eicosanone	-1.47542	0.456524	-3.23187	0.0013686	0.0445952	Fatty Acyls	Fatty alcohols
DNER	Coumestrin	-0.276984	0.0857155	-3.23144	0.00137058	0.0445952	Isoflavonoids	Coumestans
MCP-2	Docosadienoate (22:2n6)	0.780292	0.241433	3.23192	0.00136838	0.0445952	Fatty Acyls	Fatty acids and conjugates
MMP-1	Distichonic acid A	-1.03125	0.319241	-3.23031	0.00137581	0.0446324	Carboxylic acids and derivatives	Amino acids, peptides, and analogues
CD40	3-O-Methylglycyrol	-0.411143	0.127278	-3.23029	0.00137591	0.0446324	Isoflavonoids	Coumestans
MCP-4	(±)-2-Butylthiazolidine	-0.902174	0.279881	-3.22342	0.00140816	0.0453003	Azolidines	Thiazolidines
MCP-1	2-O-(Z-p-Hydroxycinnamoyl)-(x)-glyceric acid	-0.883081	0.273843	-3.22477	0.0014018	0.0453003	Cinnamic acids and derivatives	Hydroxycinnamic acids and derivatives
CASP-8	Divanillyltetrahydrofuran ferulate	-0.866591	0.268873	-3.22305	0.00140995	0.0453003	Furanoid lignans	Tetrahydrofuran lignans
MCP-1	Ternatin	-0.540224	0.167623	-3.22284	0.00141093	0.0453003	Carboxylic acids and derivatives	Amino acids, peptides, and analogues
HGF	1-(8Z,11Z,14Z-eicosatrienoyl)-glycero-3-phosphate	-0.335885	0.104223	-3.22275	0.00141138	0.0453003	Glycerophospholipids	Glycerophospholipids
CXCL10	4'',5,6-Trimethylscutellarein 7-glucoside	1.04552	0.324148	3.22543	0.00139866	0.0453003	Anthracenes	Anthraquinones
FGF-21	6-(2-Carboxyethyl)-7-hydroxy-2,2-dimethyl-4-chromanone glucoside	1.50106	0.465644	3.22362	0.00140724	0.0453003	Organooxygen compounds	Carbohydrates and carbohydrate conjugates
TNF	3-hydroxyundecanoyl carnitine	0.363912	0.113015	3.22004	0.00142433	0.045647	Fatty Acyls	Fatty acid esters
CCL20	Decenoic (C10:1)	0.415918	0.129227	3.21851	0.00143166	0.0458131	Fatty Acyls	Fatty acids and conjugates
CXCL1	Cyanidin 3-(6-caffeoylglucoside) 5-glucoside	-1.88535	0.586423	-3.215	0.00144868	0.0460125	Flavonoids	Flavonoid glycosides
CSF-1	1-(8Z,11Z,14Z-eicosatrienoyl)-glycero-3-phosphate	-0.220351	0.0685016	-3.21673	0.00144028	0.0460125	Glycerophospholipids	Glycerophospholipids
MCP-2	Methyl 3,4-dihydroxy-5-prenylbenzoate 3-glucoside	0.419176	0.130347	3.21585	0.00144458	0.0460125	Prenol lipids	Terpene glycosides
CX3CL1	Linoleamide	0.422671	0.131457	3.21527	0.00144737	0.0460125	Fatty Acyls	Fatty amides
FGF-23	Madlongiside C	0.817847	0.254315	3.21589	0.00144438	0.0460125	Prenol lipids	Triterpenoids
CXCL10	Theogallin	-1.42128	0.442361	-3.21293	0.0014588	0.0462647	Organooxygen compounds	Alcohols and polyols
CX3CL1	(-)-Dioxibrassinin	-0.611187	0.190267	-3.21226	0.00146213	0.0463014	Carboxylic acids and derivatives	Amino acids, peptides, and analogues
LAP.TGF-beta-1	Marcanine A	-0.874537	0.272303	-3.21163	0.00146521	0.0463302	Quinolines and derivatives	Benzoquinolines
CXCL6	Neferine	-1.22888	0.382817	-3.2101	0.00147277	0.0464093	Isoquinolines and derivatives	Benzylisoquinolines
CSF-1	Peonidin-3-galactoside	-0.220533	0.0686928	-3.21042	0.0014712	0.0464093	Flavonoids	Flavonoid glycosides
IL6	(S)-[8]-Gingerol	0.318921	0.0993586	3.2098	0.00147424	0.0464093	Phenols	Methoxyphenols
MCP-4	Protogonyautoxin I	-1.26439	0.394273	-3.20689	0.00148873	0.0466586	Saxitoxins, gonyautoxins, and derivatives	NOT AVAILABLE
Flt3L	Hv-NCC-1	-0.594211	0.185279	-3.20711	0.00148764	0.0466586	Tetrapyrroles and derivatives	NOT AVAILABLE
CCL4	3-hydroxynonanoyl carnitine	0.28774	0.0897105	3.20743	0.00148604	0.0466586	Fatty Acyls	Fatty acid esters
CXCL10	Naringenin	-0.528788	0.164969	-3.20537	0.00149634	0.0467597	Flavonoids	Flavans
DNER	Hydrocortamate	-0.270562	0.0843993	-3.20574	0.0014945	0.0467597	Steroids and steroid derivatives	Pregnane steroids
CCL20	Caffeine	1.1112	0.346735	3.20475	0.00149945	0.0467881	Imidazopyrimidines	Purines and purine derivatives
MCP-4	Bis(2-furanylmethyl) sulfide	-0.717739	0.224031	-3.20375	0.00150451	0.0468773	Heteroaromatic compounds	NOT AVAILABLE
CXCL11	1-(8Z,11Z,14Z-eicosatrienoyl)-glycero-3-phosphate	-1.05536	0.329592	-3.20201	0.00151332	0.0470832	Glycerophospholipids	Glycerophospholipids
MCP-4	Ternatin	-0.860965	0.269318	-3.19683	0.0015398	0.0478372	Carboxylic acids and derivatives	Amino acids, peptides, and analogues
MCP-4	Egonol glucoside	0.824182	0.258021	3.19425	0.00155319	0.0481828	2-arylbenzofuran flavonoids	NOT AVAILABLE
CXCL1	1-Phenyl-1,3-heptadecanedione	1.29389	0.405222	3.19304	0.00155946	0.048307	Organooxygen compounds	Carbonyl compounds
CCL28	Alpha-Tocopherol	0.271329	0.0849876	3.19257	0.00156192	0.0483129	Prenol lipids	Quinone and hydroquinone lipids
IL-18R1	Peonidin-3-galactoside	-0.396771	0.12434	-3.19102	0.00157004	0.0484938	Flavonoids	Flavonoid glycosides
CXCL6	Thymol	-2.23139	0.699647	-3.1893	0.0015791	0.0487031	Prenol lipids	Monoterpenoids
CXCL6	(-)-Epigallocatechin 3,5-di-gallate	-1.60663	0.504135	-3.18691	0.00159175	0.0488564	Flavonoids	Flavans
MCP-4	PS(20:1(11Z)/22:6(4Z,7Z,10Z,13Z,16Z,19Z))	-0.808633	0.25378	-3.18635	0.00159475	0.0488564	Glycerophospholipids	Glycerophosphoserines
CSF-1	Divanillyltetrahydrofuran ferulate	-0.296452	0.0929986	-3.18771	0.00158754	0.0488564	Furanoid lignans	Tetrahydrofuran lignans
IL18	Ethyl beta-D-glucopyranoside	0.250275	0.0785497	3.1862	0.00159553	0.0488564	Organooxygen compounds	Carbohydrates and carbohydrate conjugates
SCF	Protogonyautoxin I	0.489987	0.153736	3.1872	0.00159025	0.0488564	Saxitoxins, gonyautoxins, and derivatives	NOT AVAILABLE
HGF	Resveratrol 4''-(6-galloylglucoside)	0.275148	0.0863793	3.18534	0.00160013	0.0489268	Prenol lipids	Sesterterpenoids
CXCL11	1-(5Z,8Z,11Z,14Z-eicosatetraenoyl)-sn-glycero-3-phosphate	-1.11045	0.348676	-3.18475	0.0016033	0.0489534	Glycerophospholipids	Glycerophosphates
TRAIL	Secoisolariciresinol 9,9''-diglucoside	-0.402169	0.126463	-3.18012	0.0016283	0.0496455	Lignan glycosides	NOT AVAILABLE
MCP-4	gamma-Glutamyl-beta-(isoxazolin-5-on-2-yl)alanine	-0.85987	0.270495	-3.17887	0.00163505	0.0497803	Carboxylic acids and derivatives	Amino acids, peptides, and analogues
LAP.TGF-beta-1	Histidine	0.296057	0.0931529	3.17818	0.00163883	0.0498242	Carboxylic acids and derivatives	Amino acids, peptides, and analogues
EN-RAGE	Madlongiside C	-0.525536	0.165412	-3.17712	0.00164462	0.049858	Prenol lipids	Triterpenoids
TNFSF14	Alpha-Linolenic acid	0.235614	0.0741519	3.17745	0.00164285	0.049858	Fatty Acyls	Lineolic acids and derivatives
